# Supplementary material for: DenHunt - A Comprehensive Database of the Intricate Network of Dengue-Human Interactions
Source: PLOS journal article supplement (doi:10.1371/journal.pntd.0004965), 2016-09-12

S1 Fig: Representation of dengue viral interacting protein in signal transduction and immune system pathway. Representation of dengue viral interacting proteins in (a) PI3K-Akt signaling pathway, (b) TNF signaling pathway, (c) NF-kappa B signaling pathway, (d) Jak-STAT signaling pathway, (e) MAPK signaling pathway, (f) HIF-1 signaling pathway, (g) Rap1 signaling pathway, (h) Sphingolipid signaling pathway, (i) Ras signaling pathway, (j) Cytokine-cytokine receptor interaction, (k) Toll-like receptor signaling pathway, (l) Chemokine signaling pathway, (m) RIG-I-like receptor signaling pathway, (n) T cell receptor signaling pathway, (o) NOD-like receptor signaling pathway, (p) Complement and coagulation cascades, (q) Natural killer cell mediated cytotoxicity, (r) Antigen processing and presentation, (s) Cytosolic DNA-sensing pathway and (t) Leukocyte transendothelial migration. The dengue virus interacting proteins are mapped to the pathways using the “Search&Colour Pathway” tool from the KEGG database. The proteins that are involved in direct interactions are colored orange, indirect interactions are colored in pink, up-regulated proteins are colored red and down-regulated proteins are colored green. The viral components are depicted as blue hexagons.

a

## PI3K-AKT SIGNALING PATHWAY

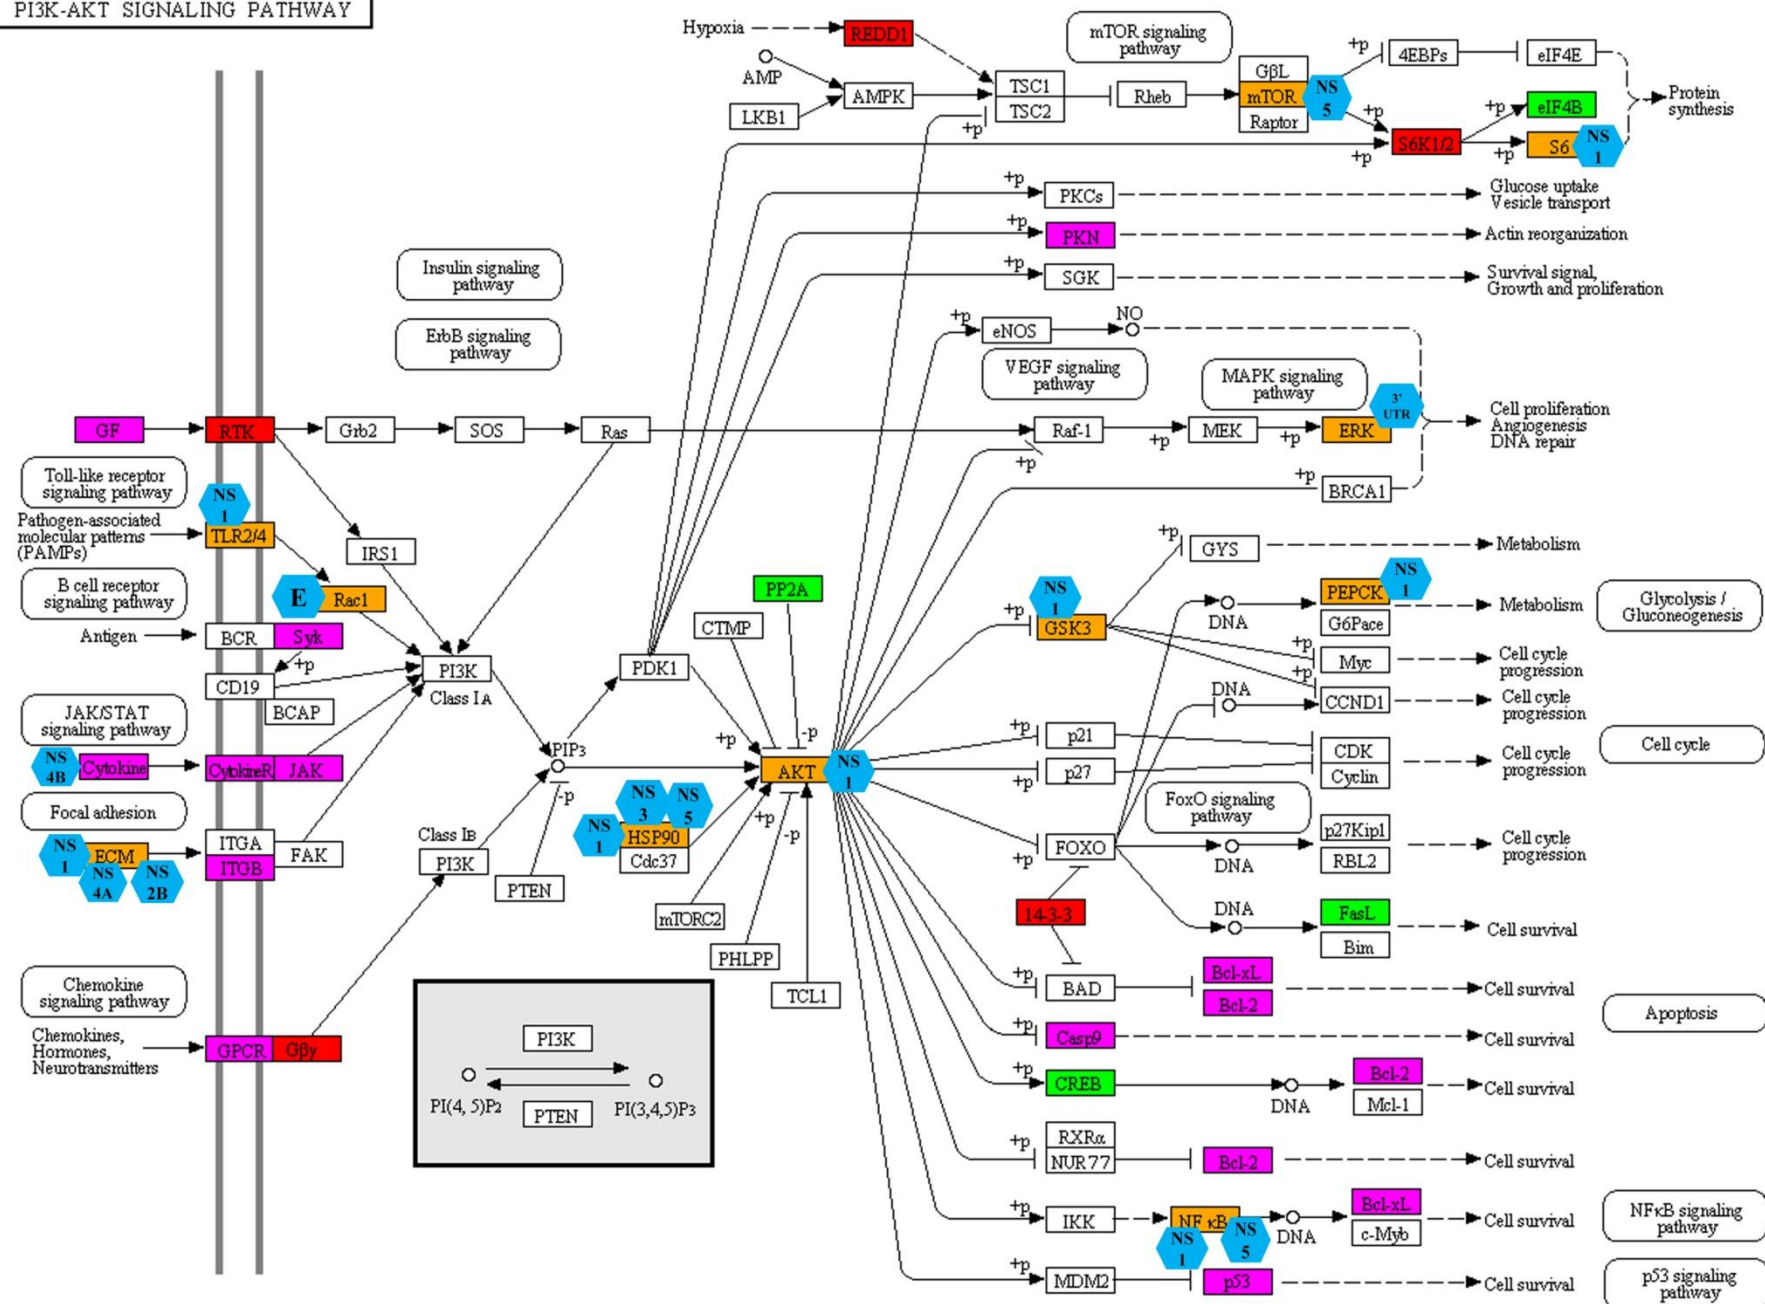

b

TNF SIGNALING PATHWAY

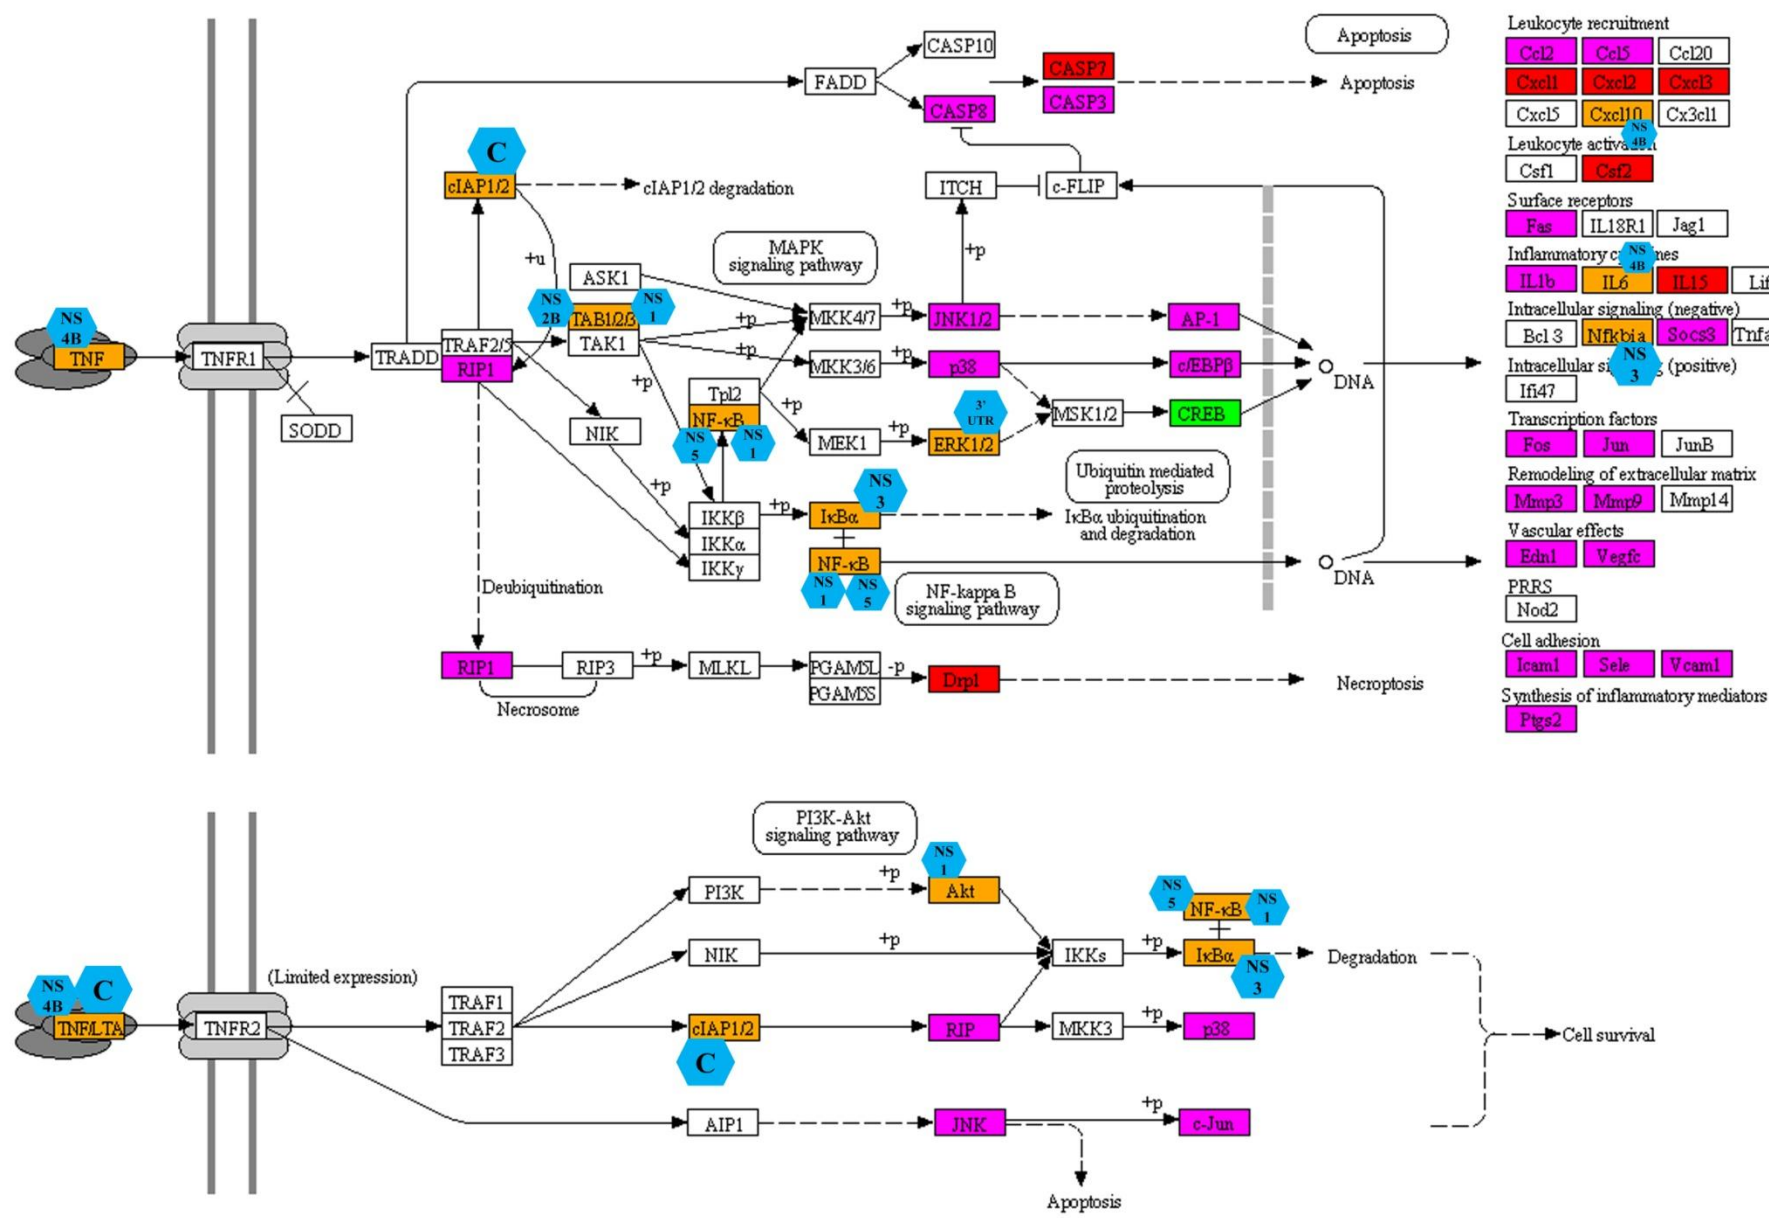

C

## NF-KAPPA B SIGNALING PATHWAY

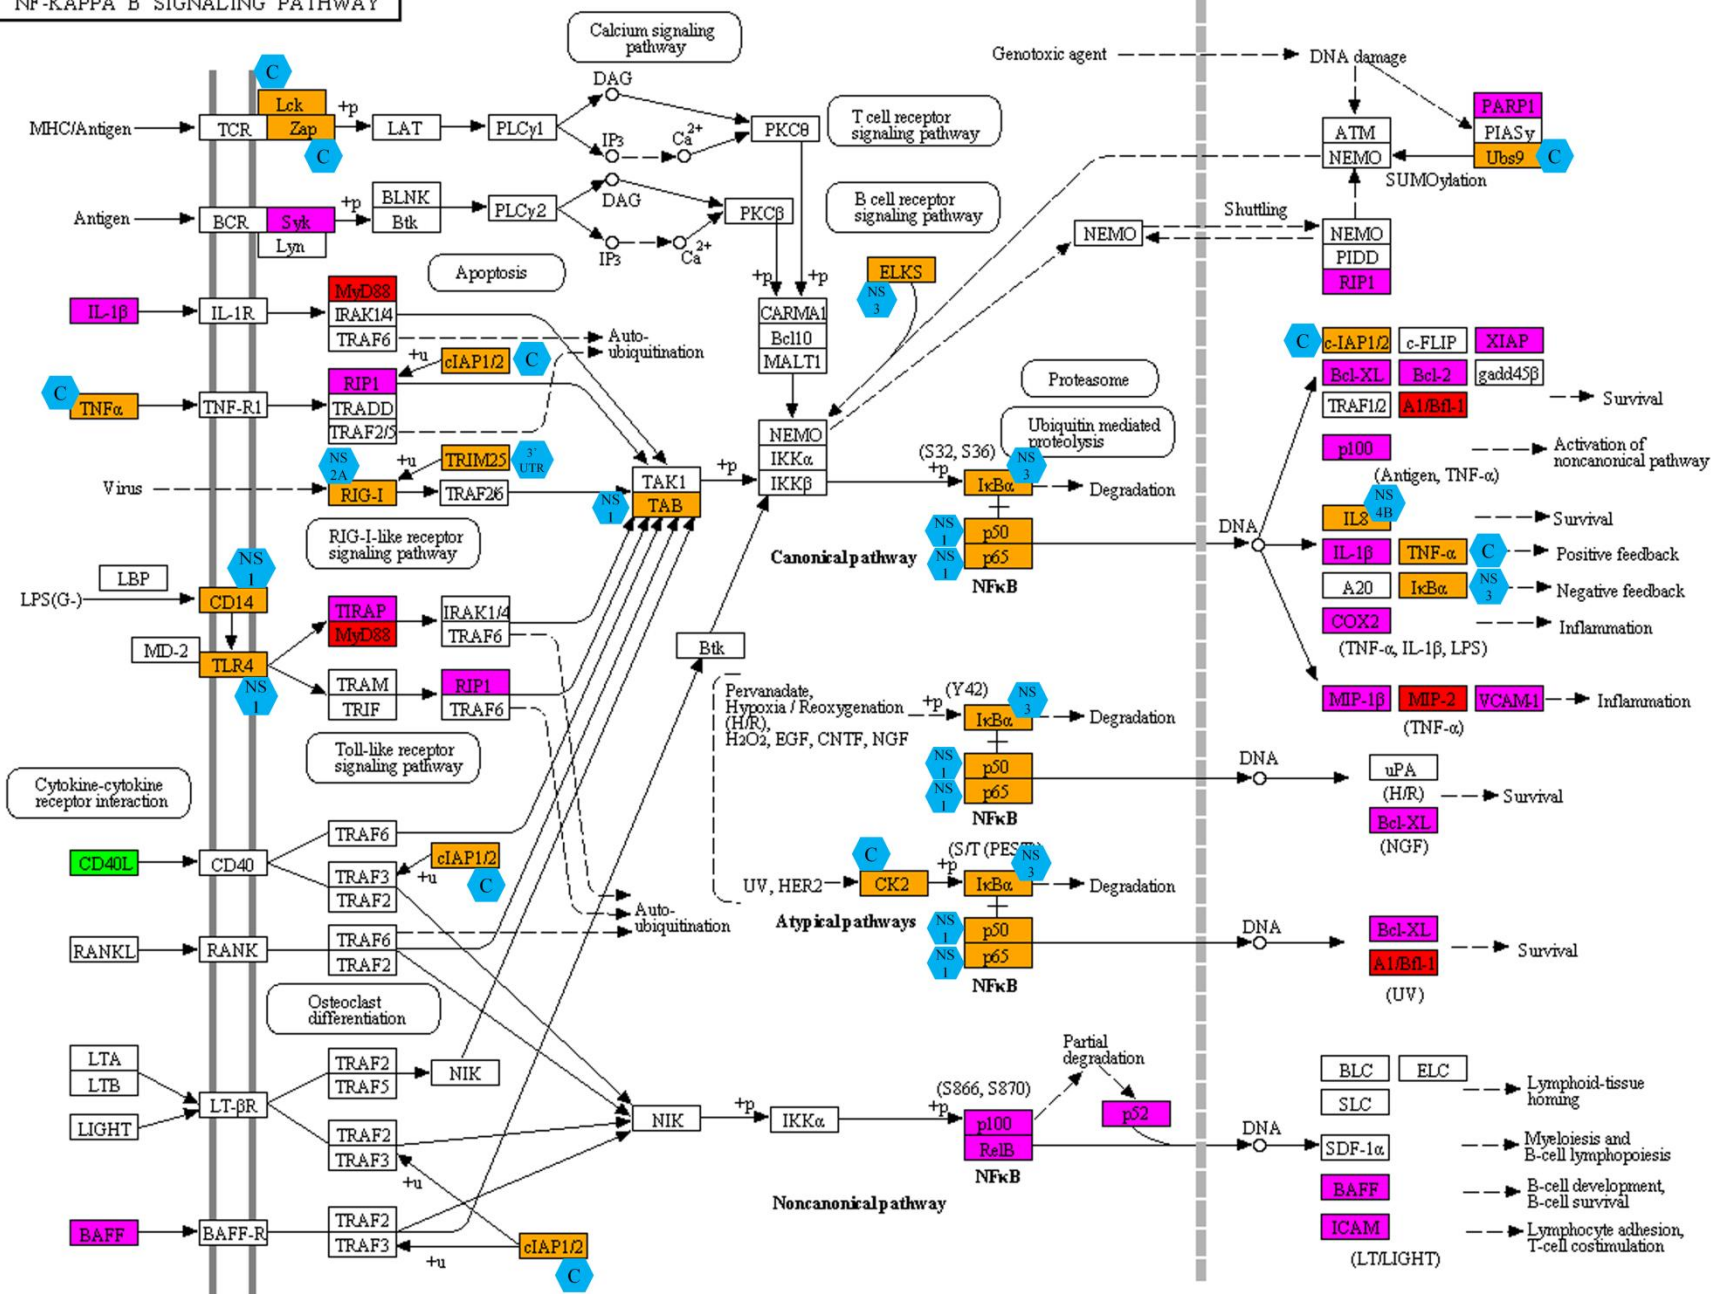

d

JAK-STAT SIGNALING PATHWAY

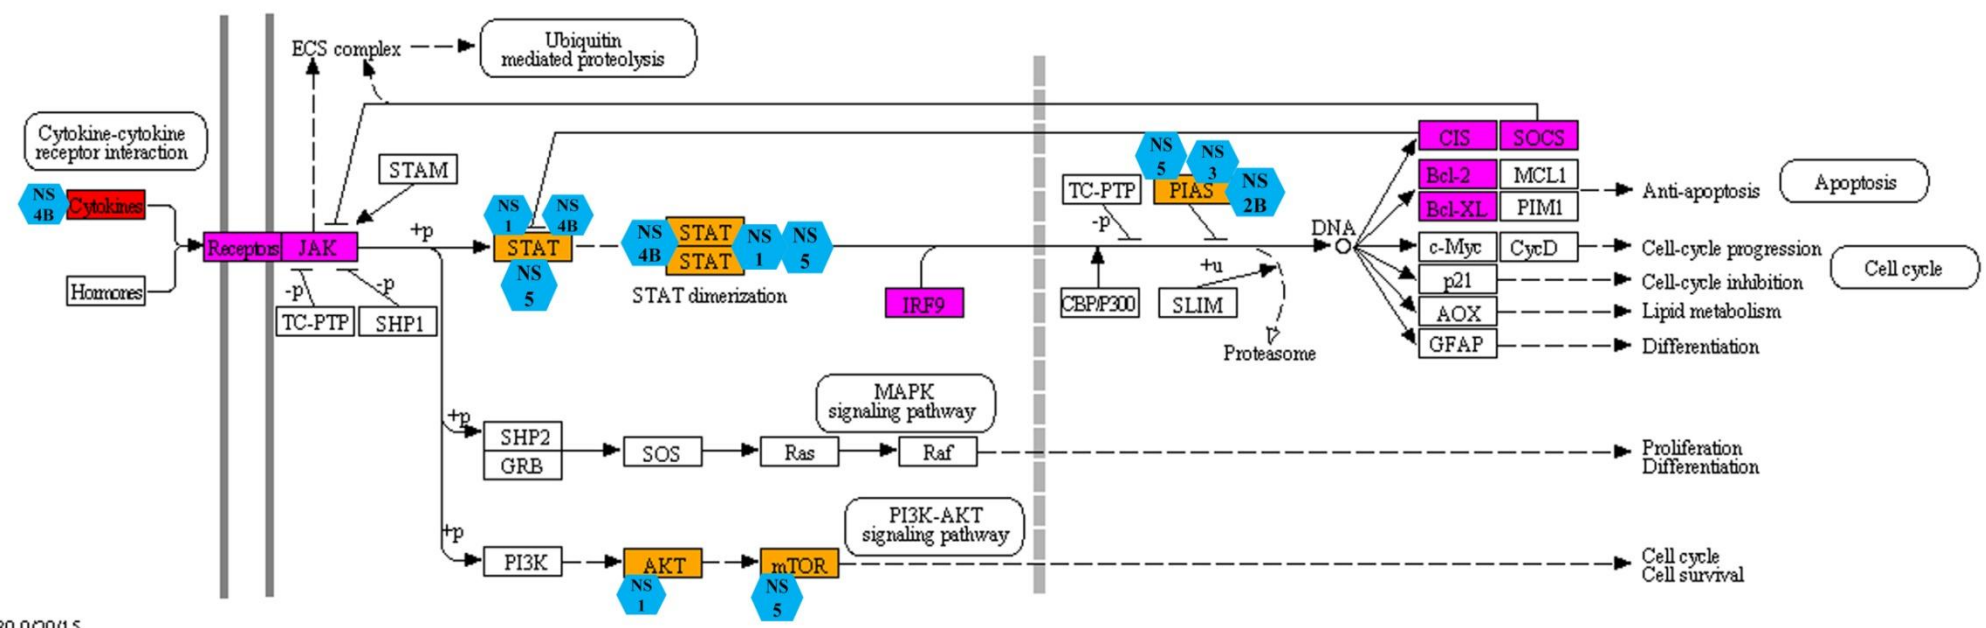



e

MAPK SIGNALING PATHWAY

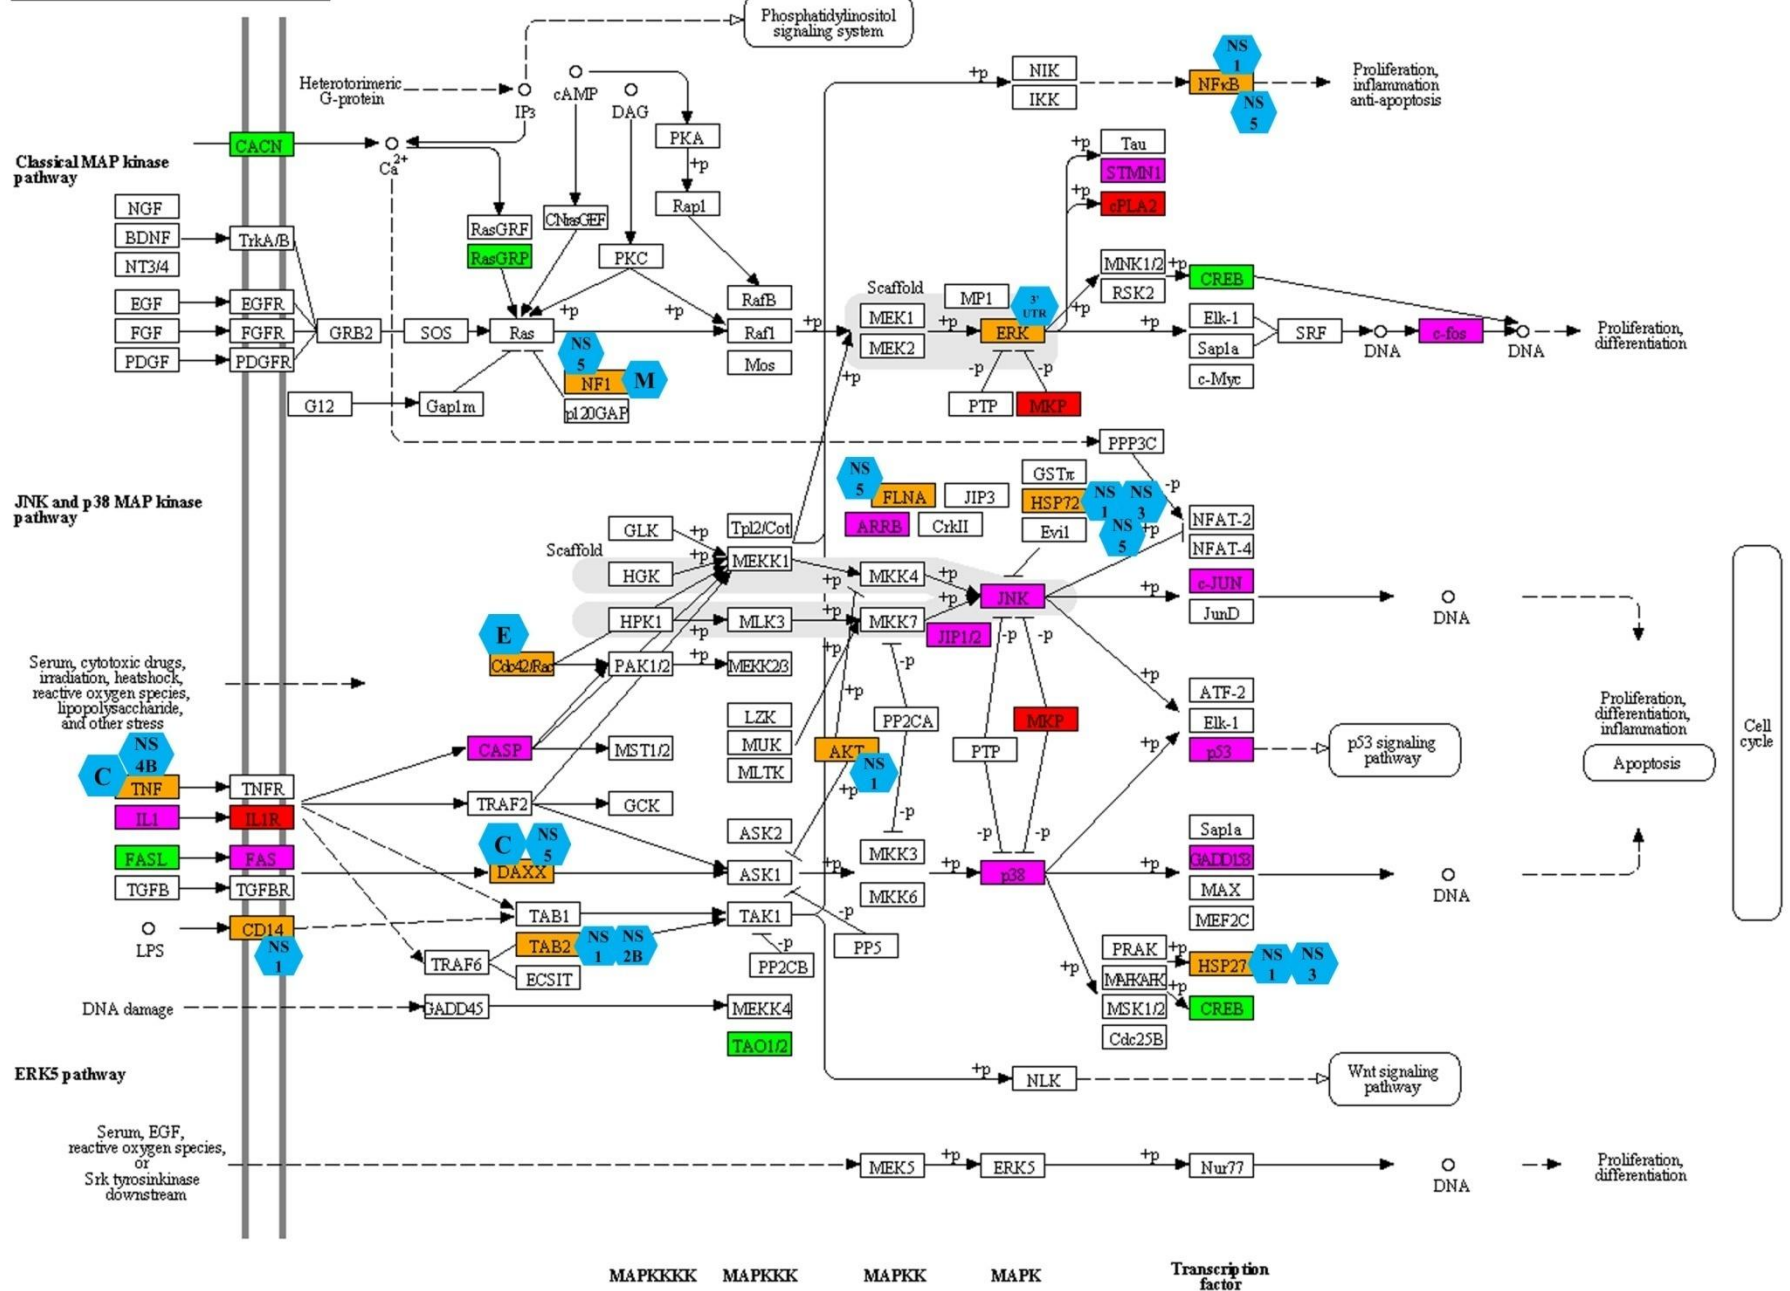

f

# HIF-1 SIGNALING PATHWAY

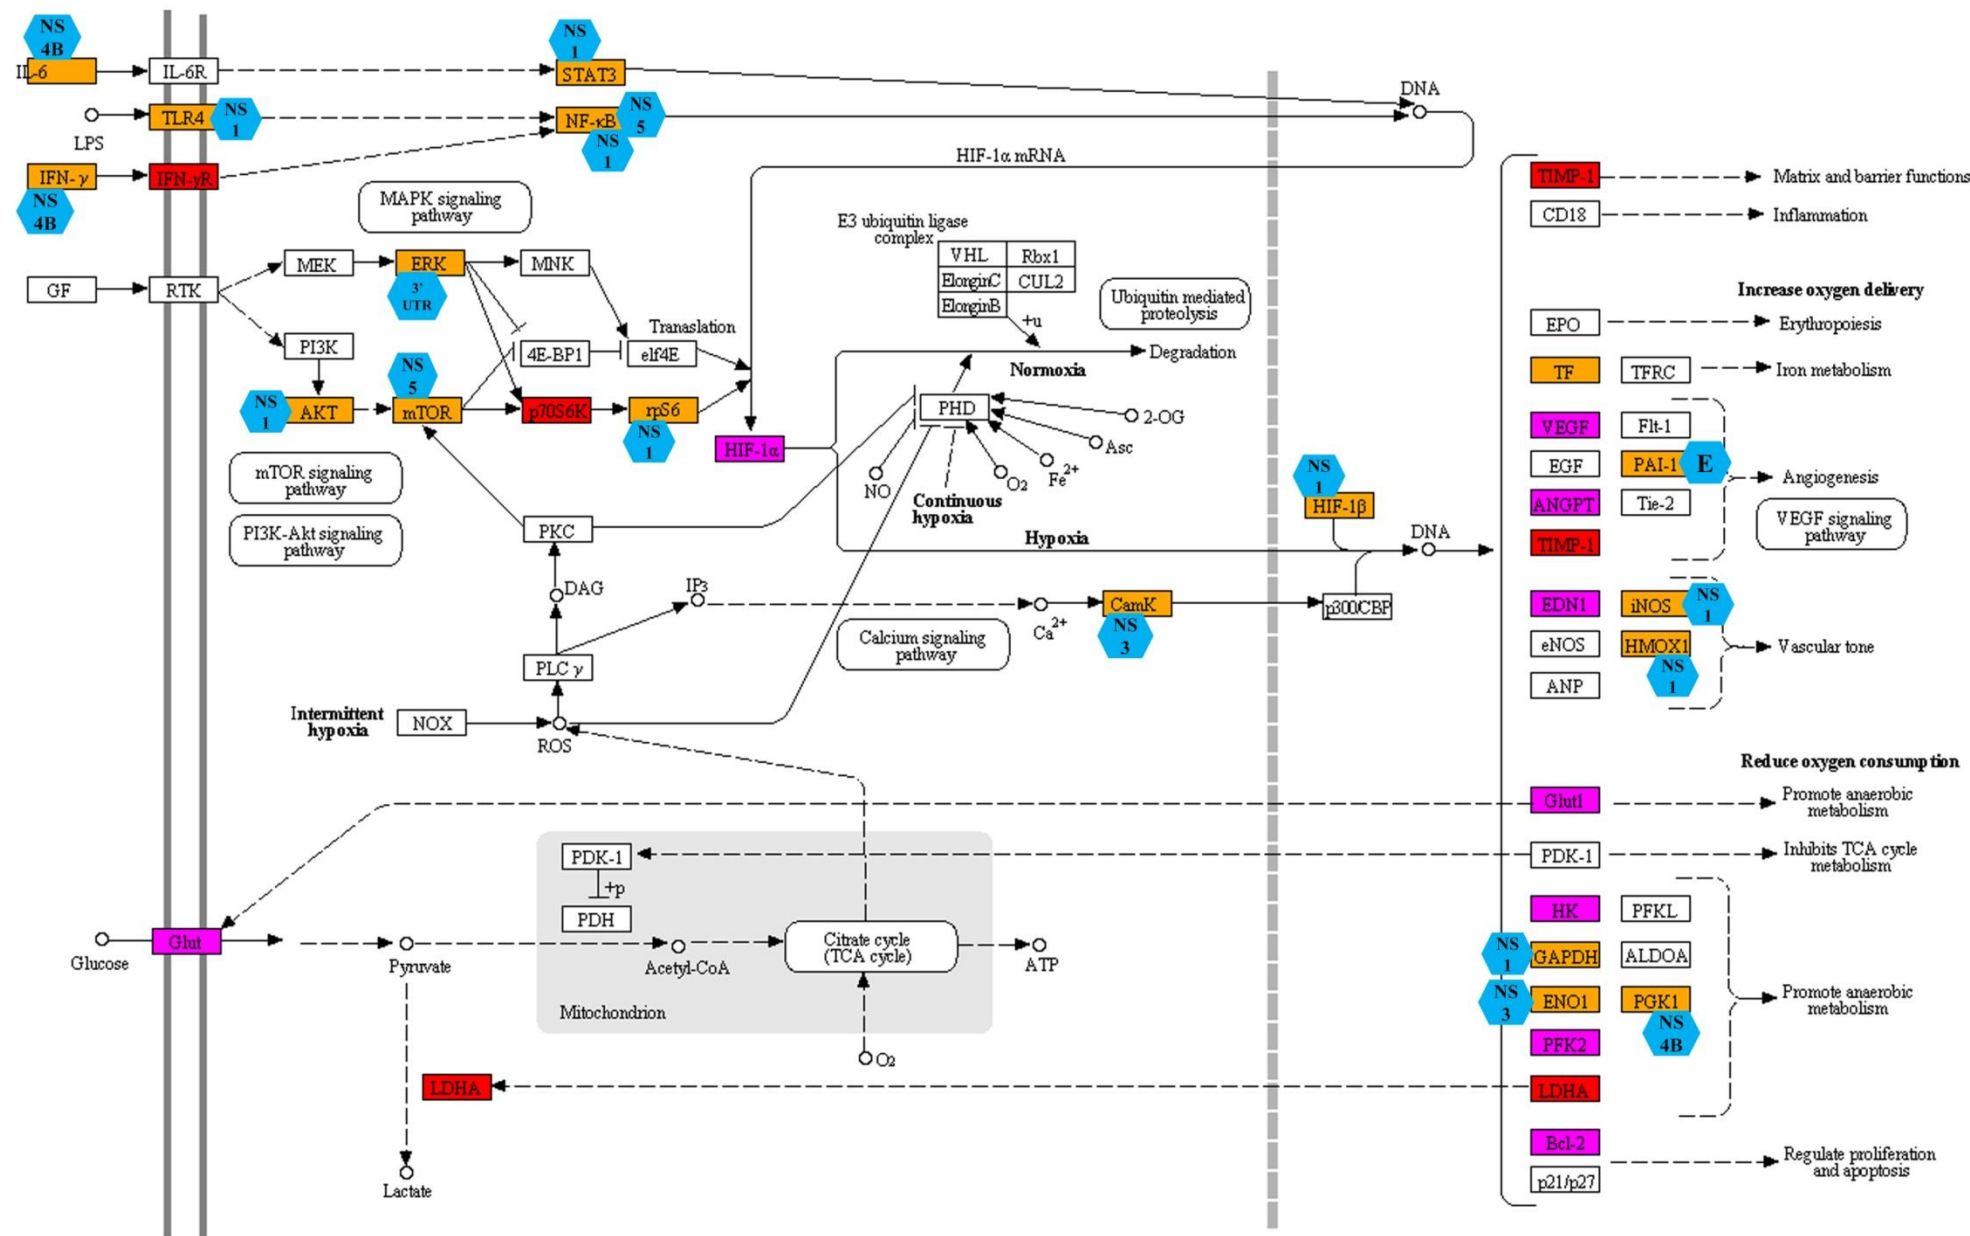

RAP1 SIGNALING PATHWAY

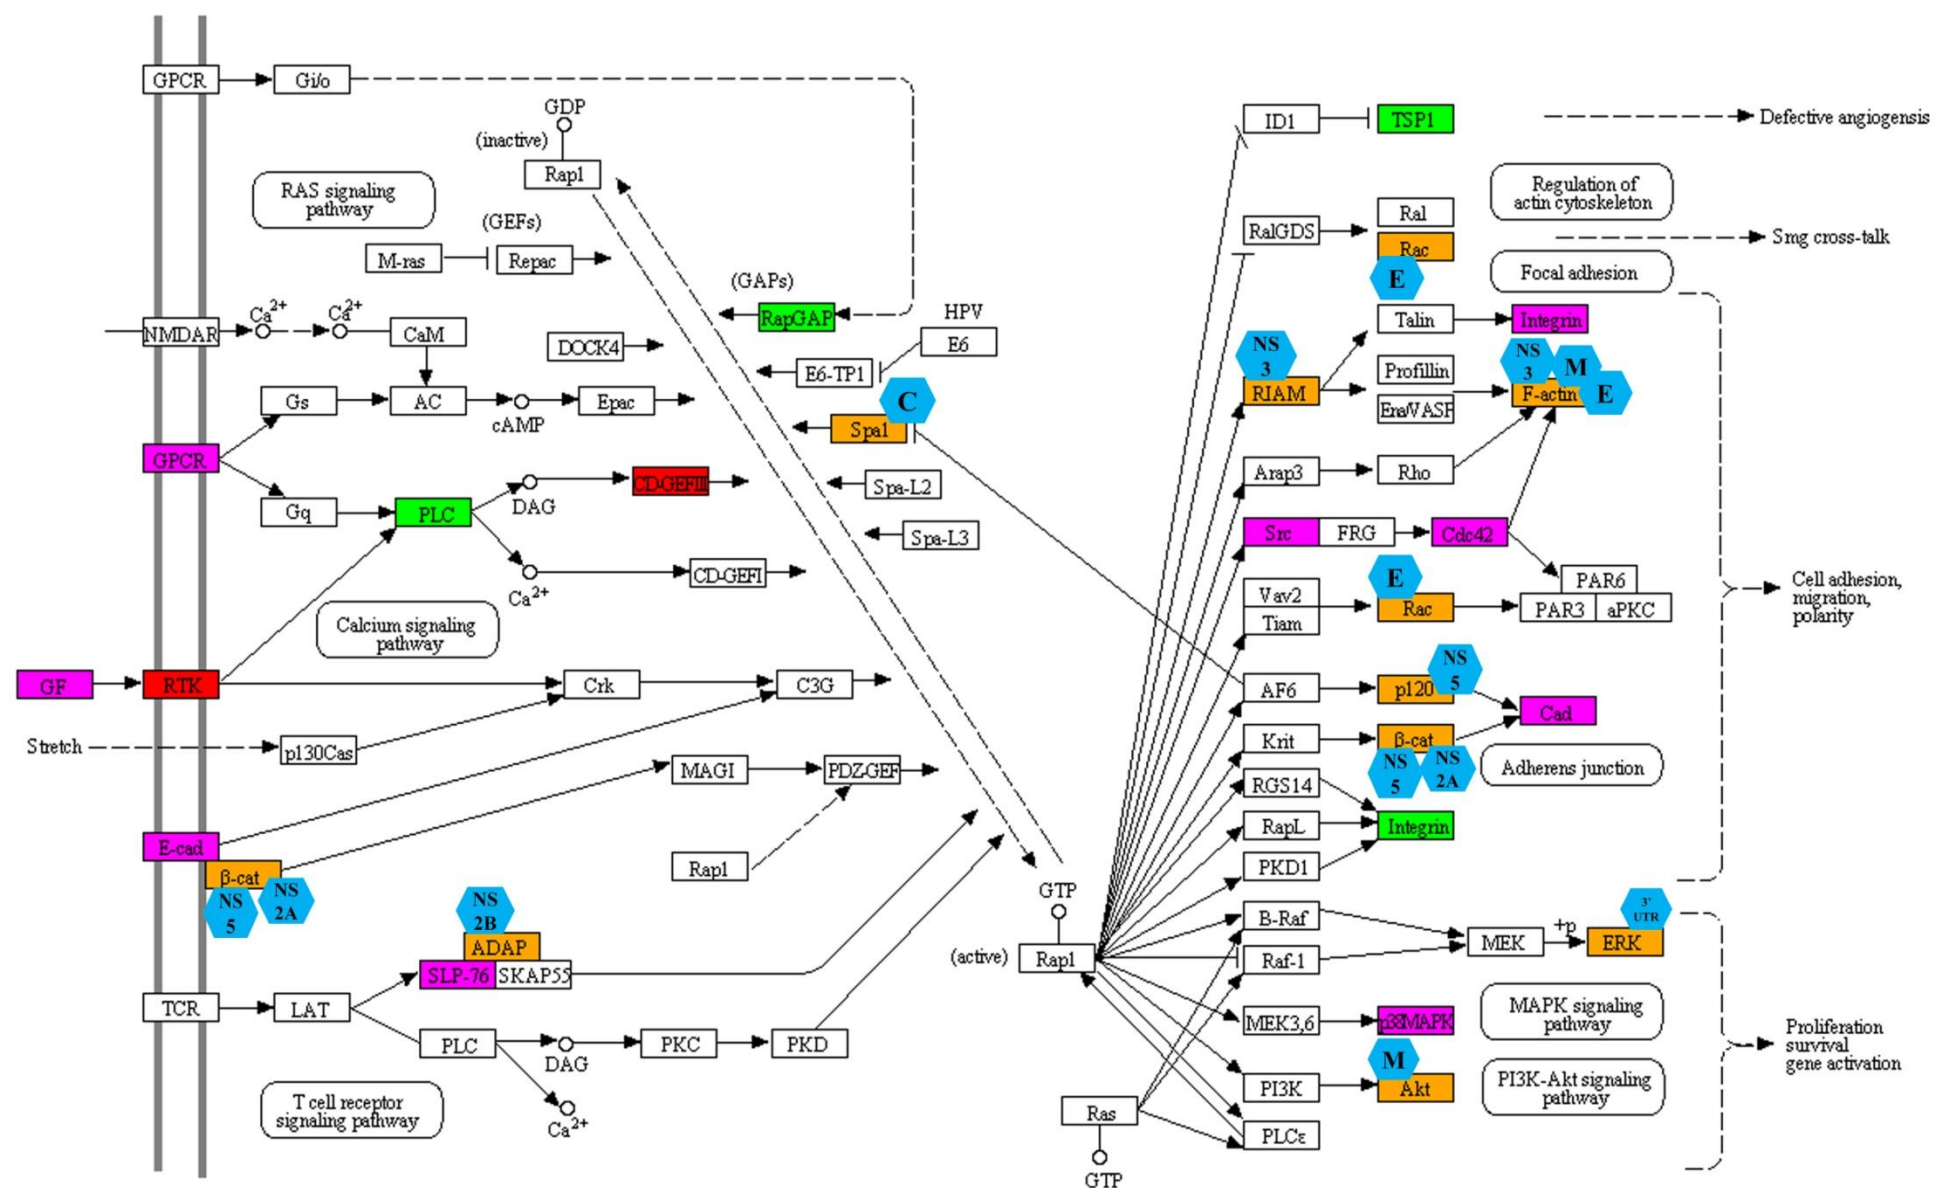



# SPHINGOLIPID SIGNALING PATHWAY

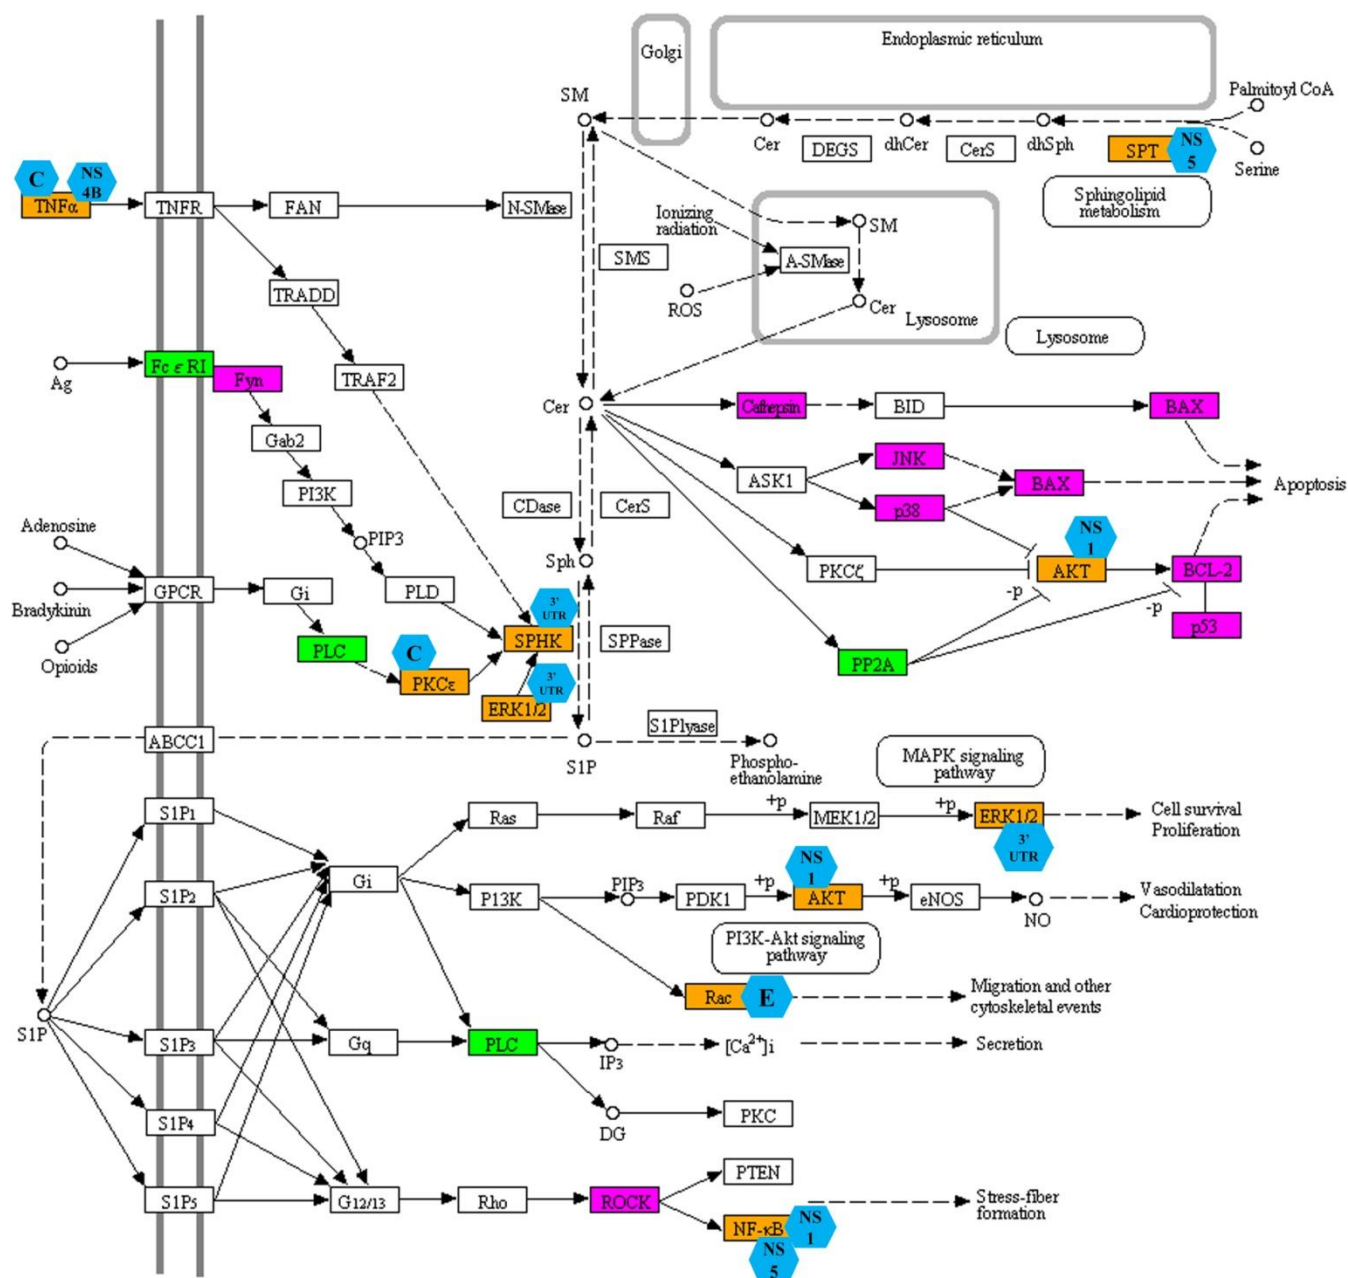

# RAS SIGNALING PATHWAY

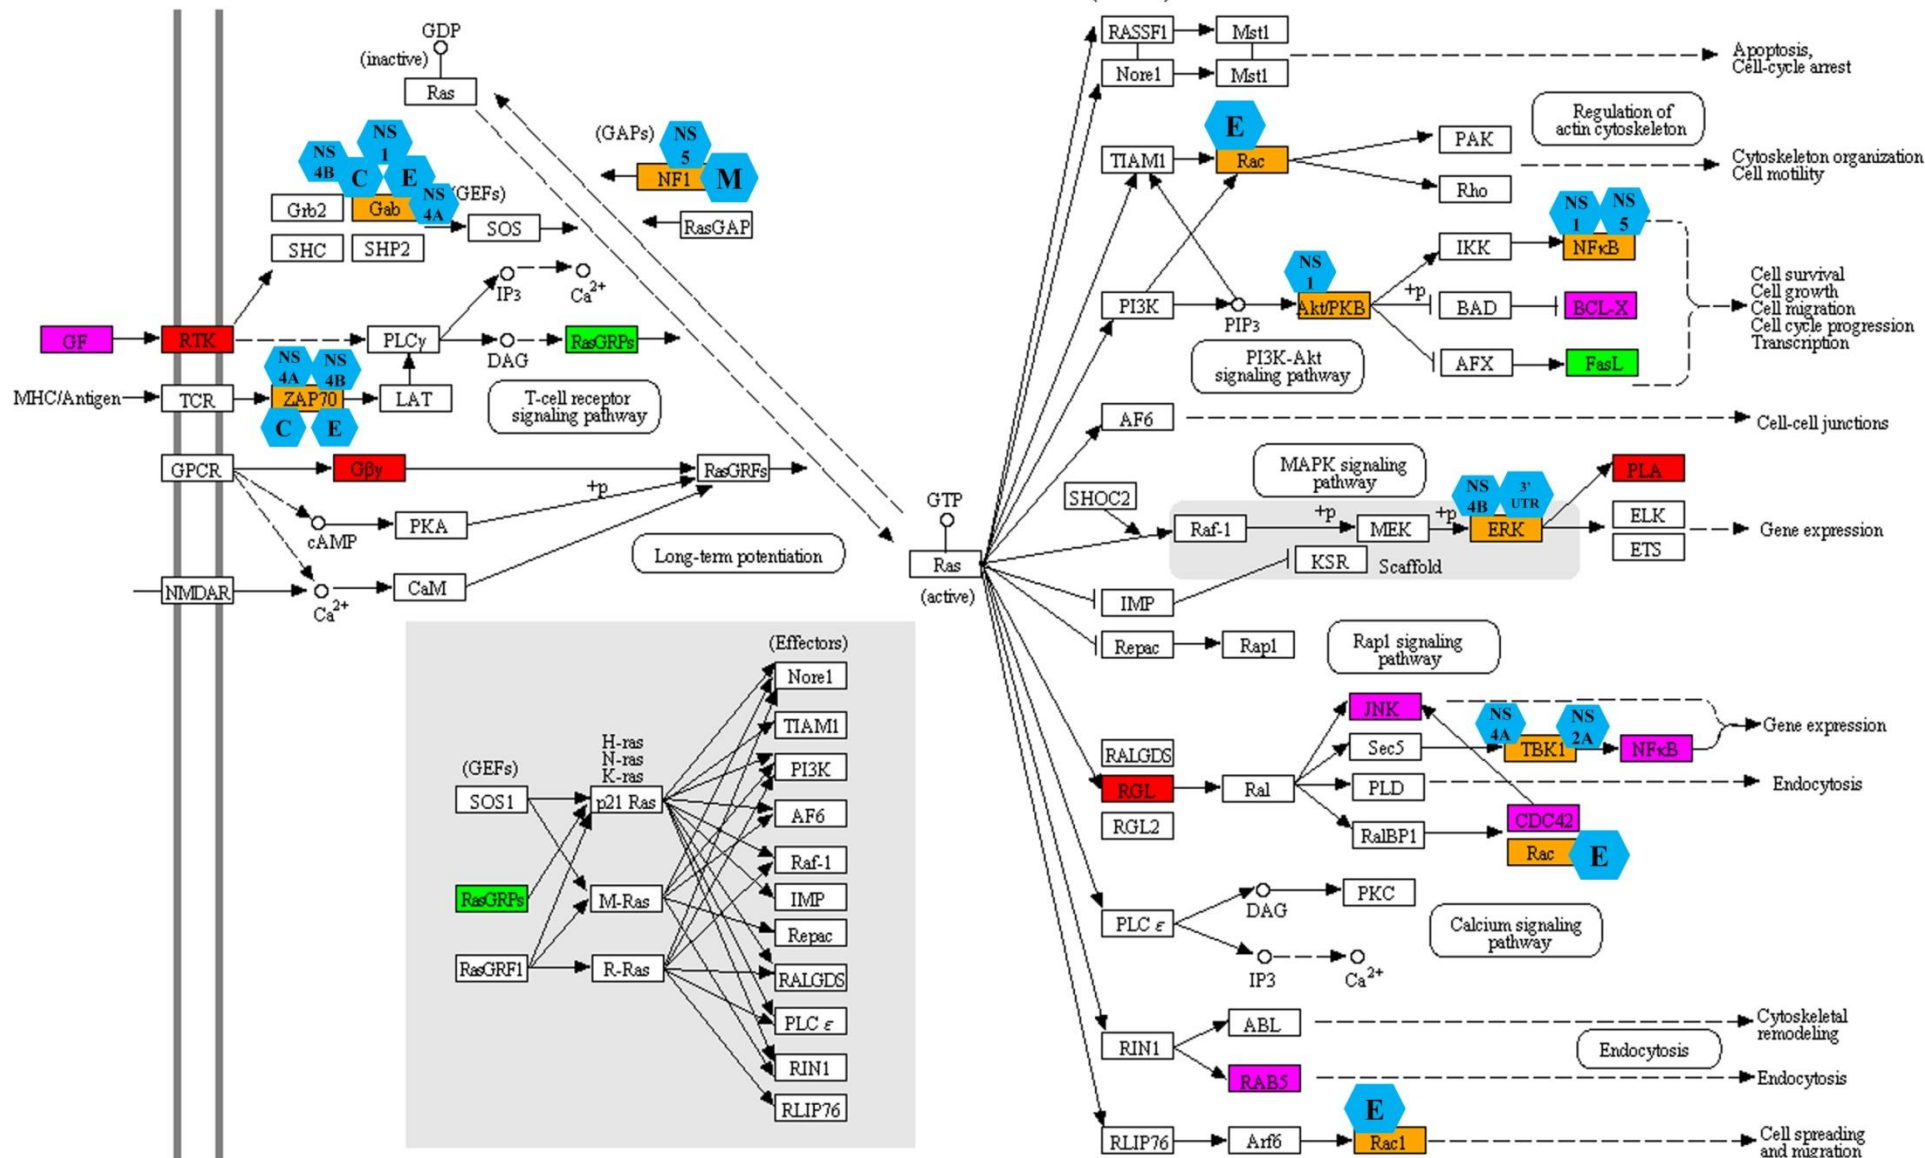

# CYTOKINE-CYTOKINE RECEPTOR INTERACTION

## Chemokines

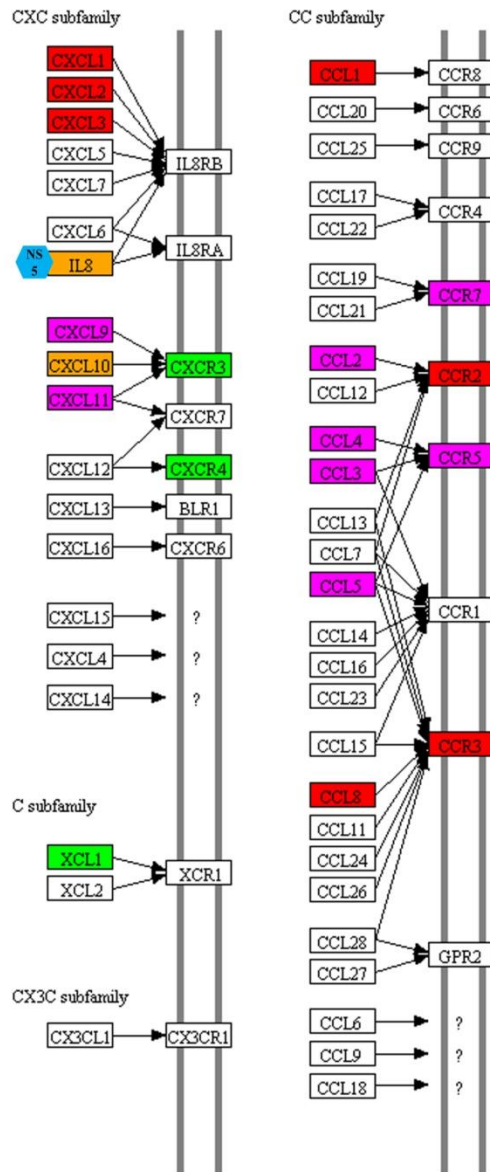

## Hematopoietins

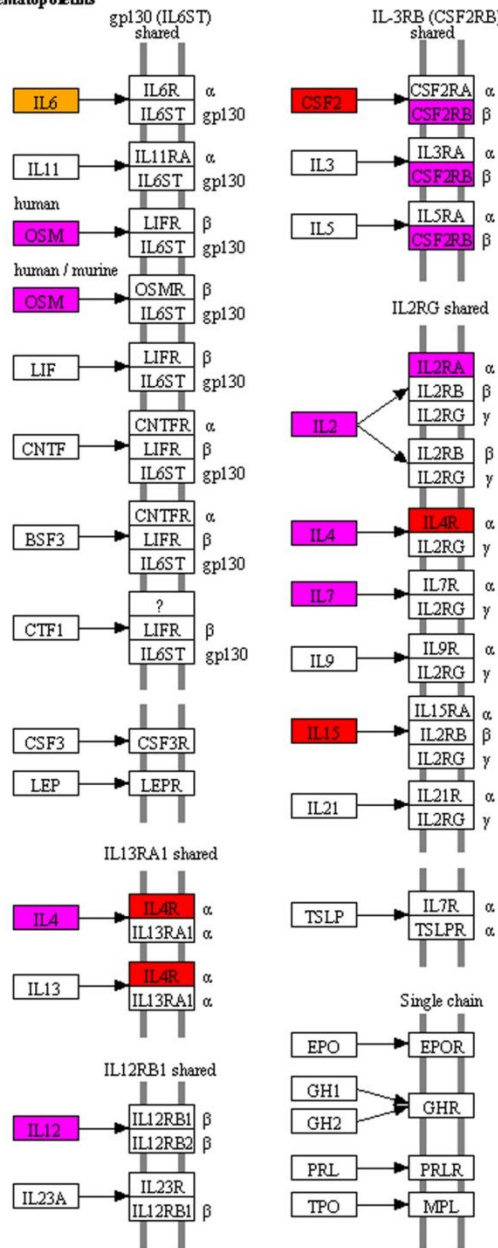

## PDGF Family

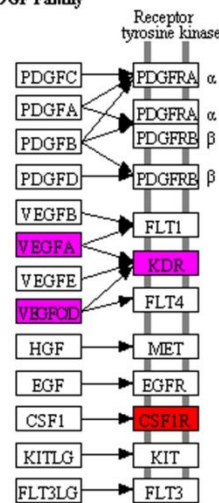

## Interferon family

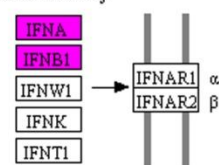

## IL-10 family

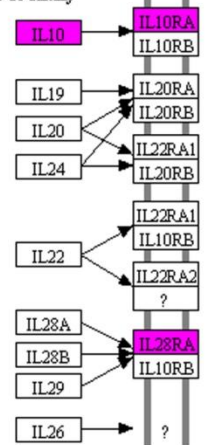

## TNF Family

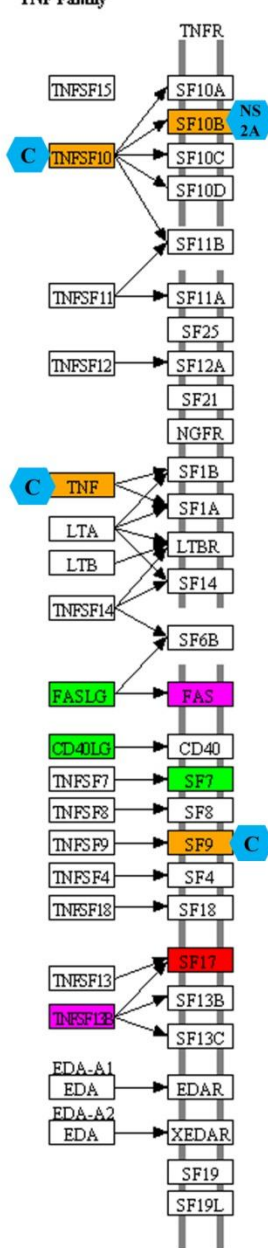

## TGF-β family

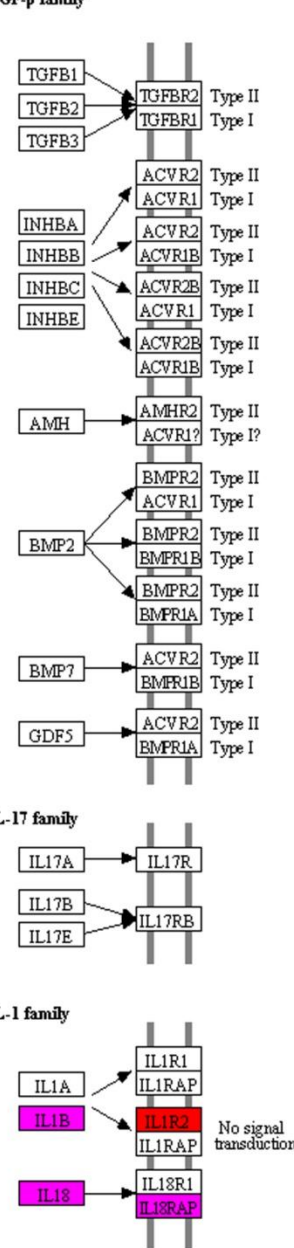



TOLL-LIKE RECEPTOR SIGNALING PATHWAY

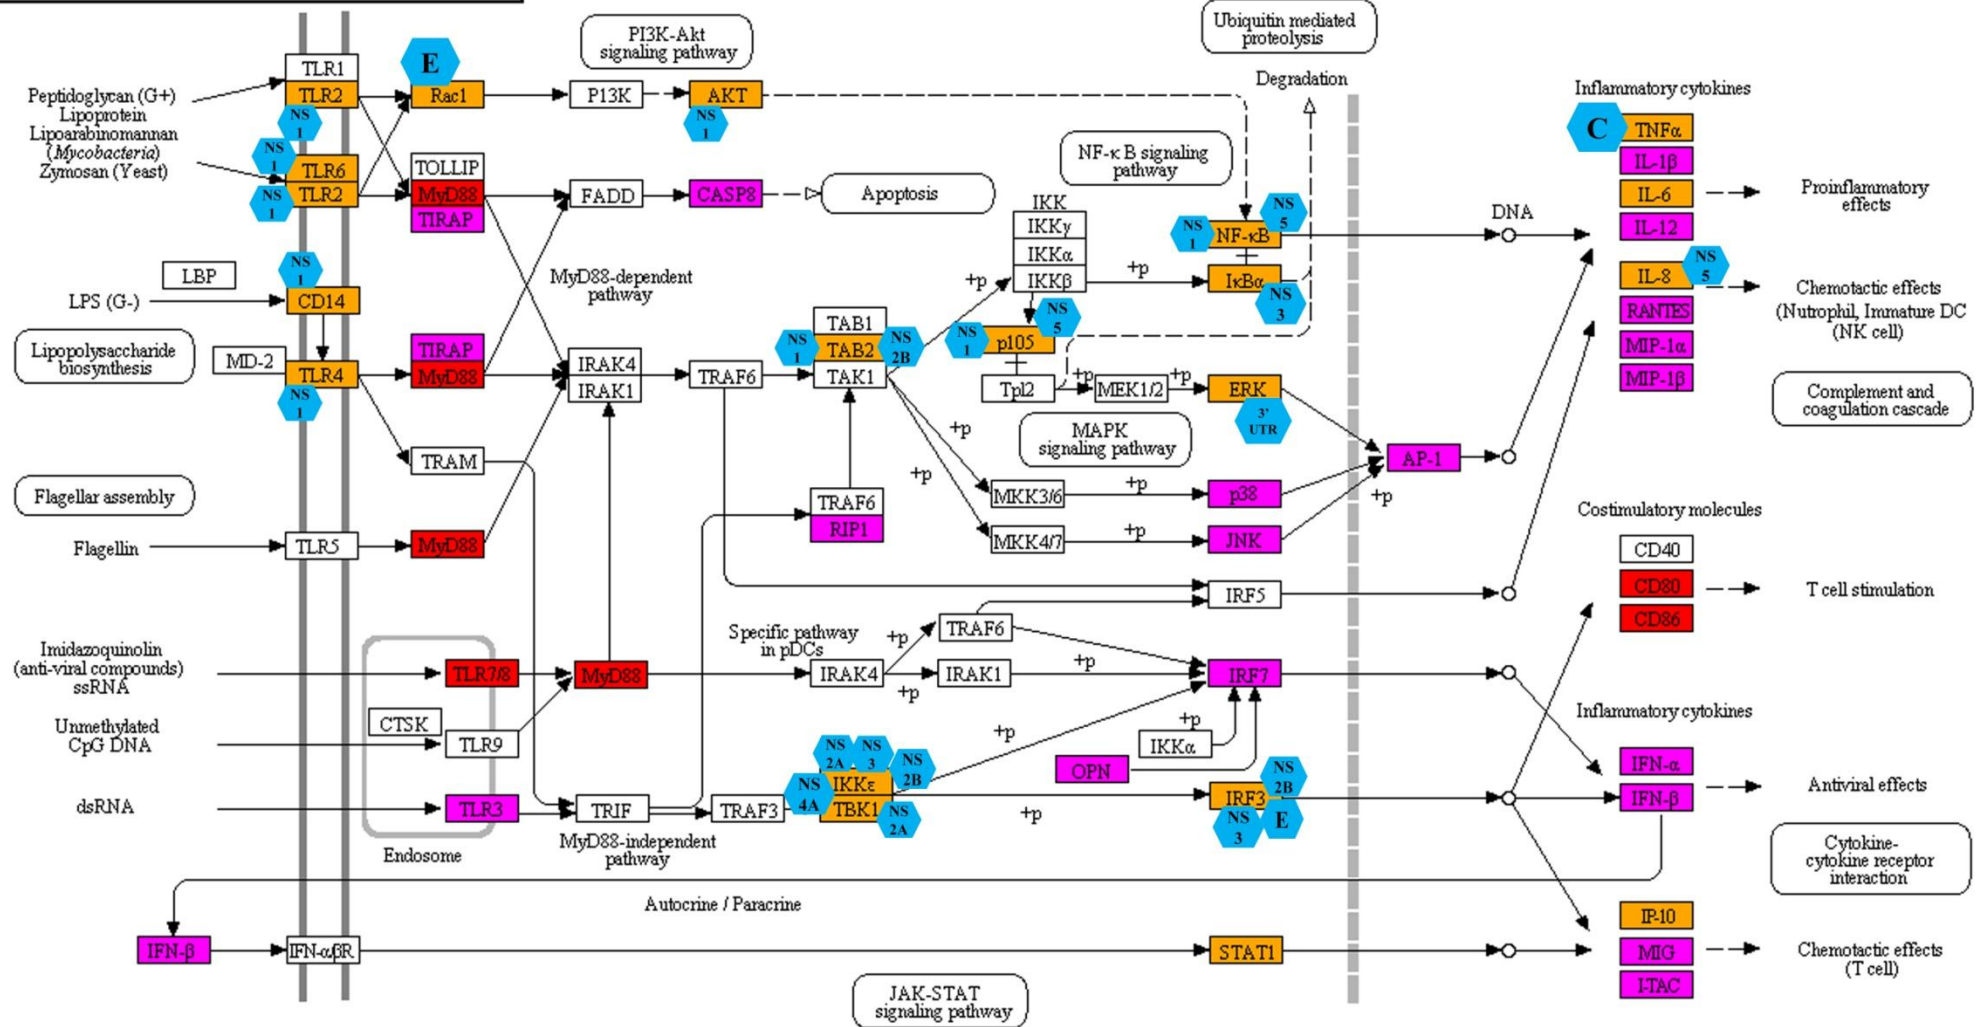



# CHEMOKINE SIGNALING PATHWAY

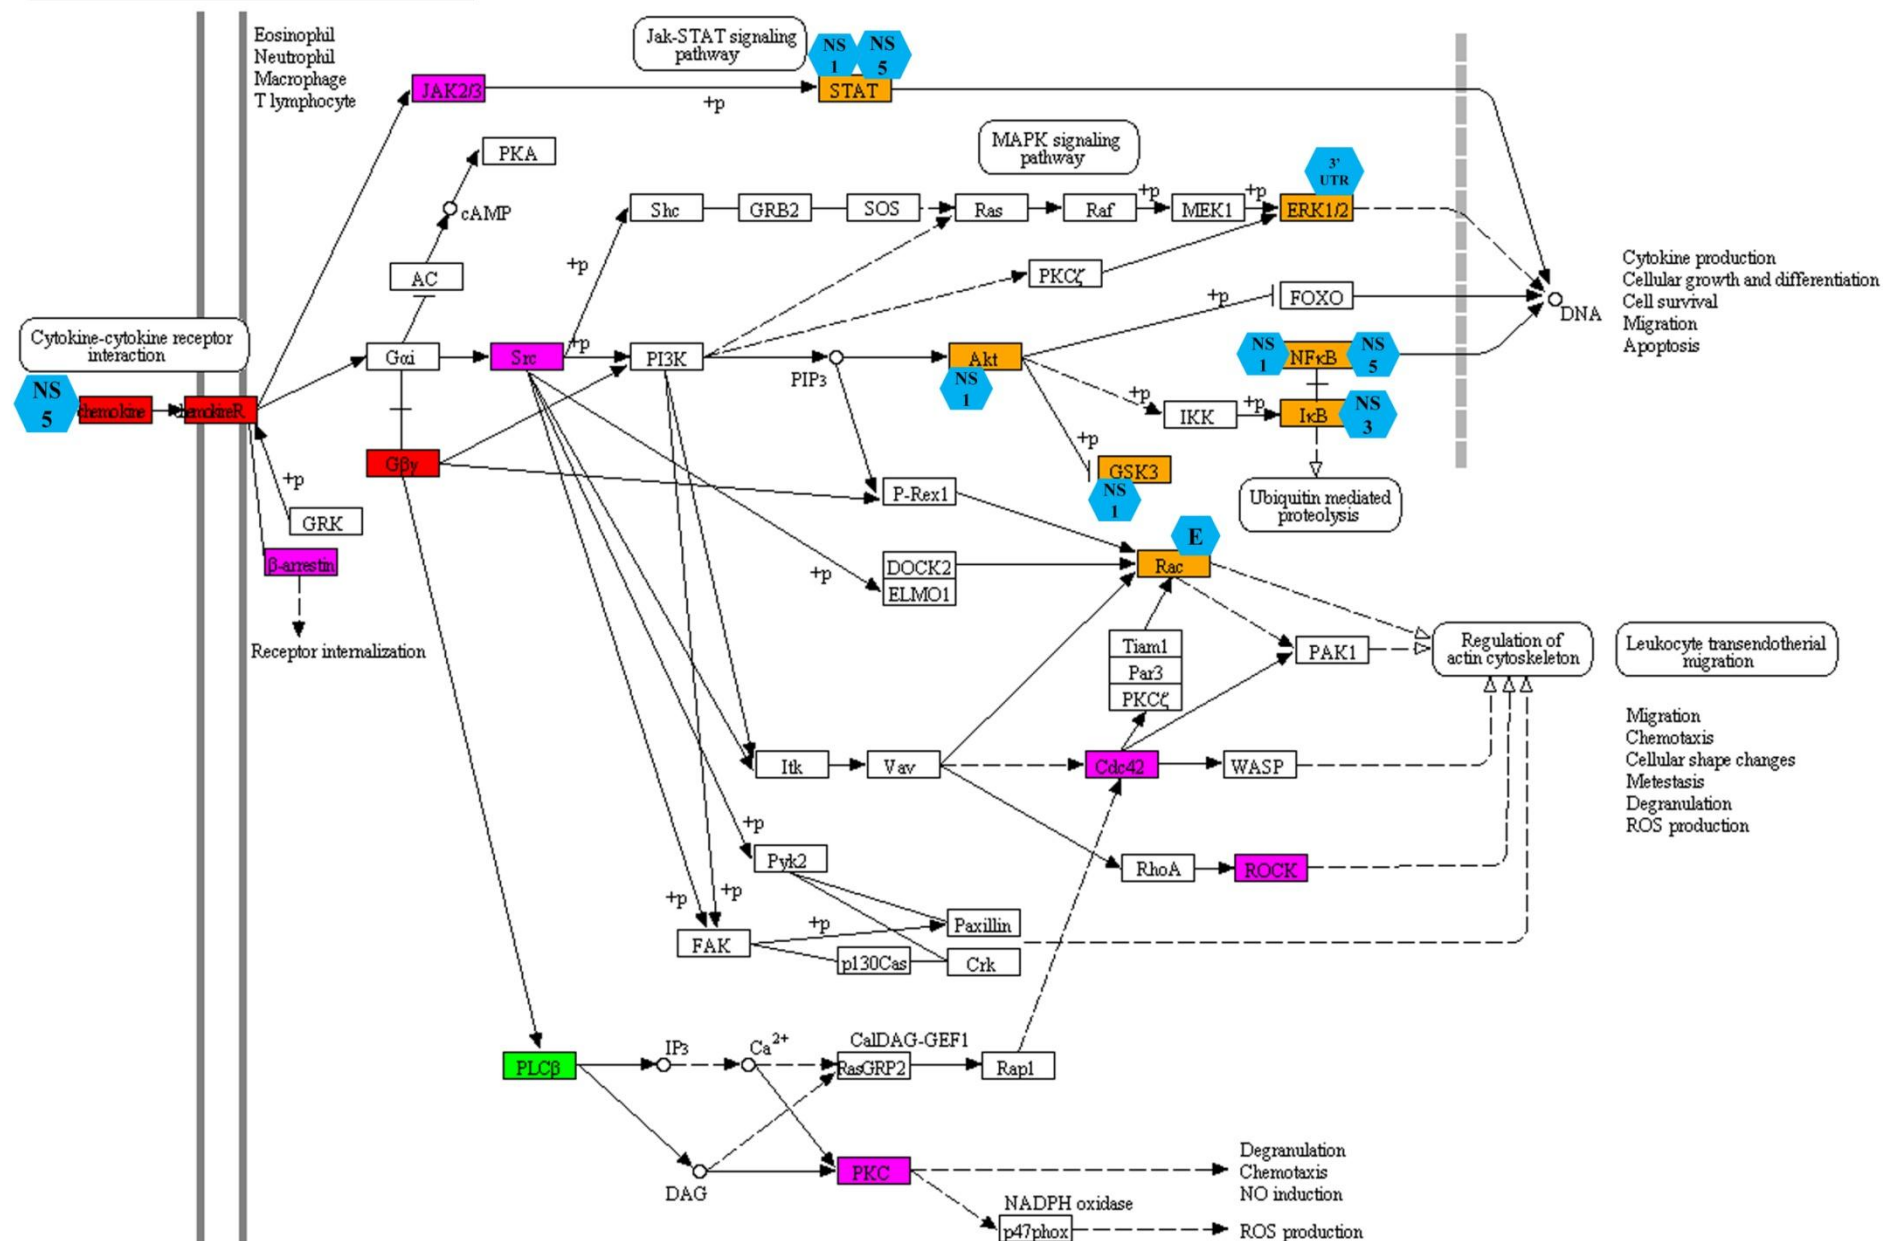

RIG-I-LIKE RECEPTOR SIGNALING PATHWAY

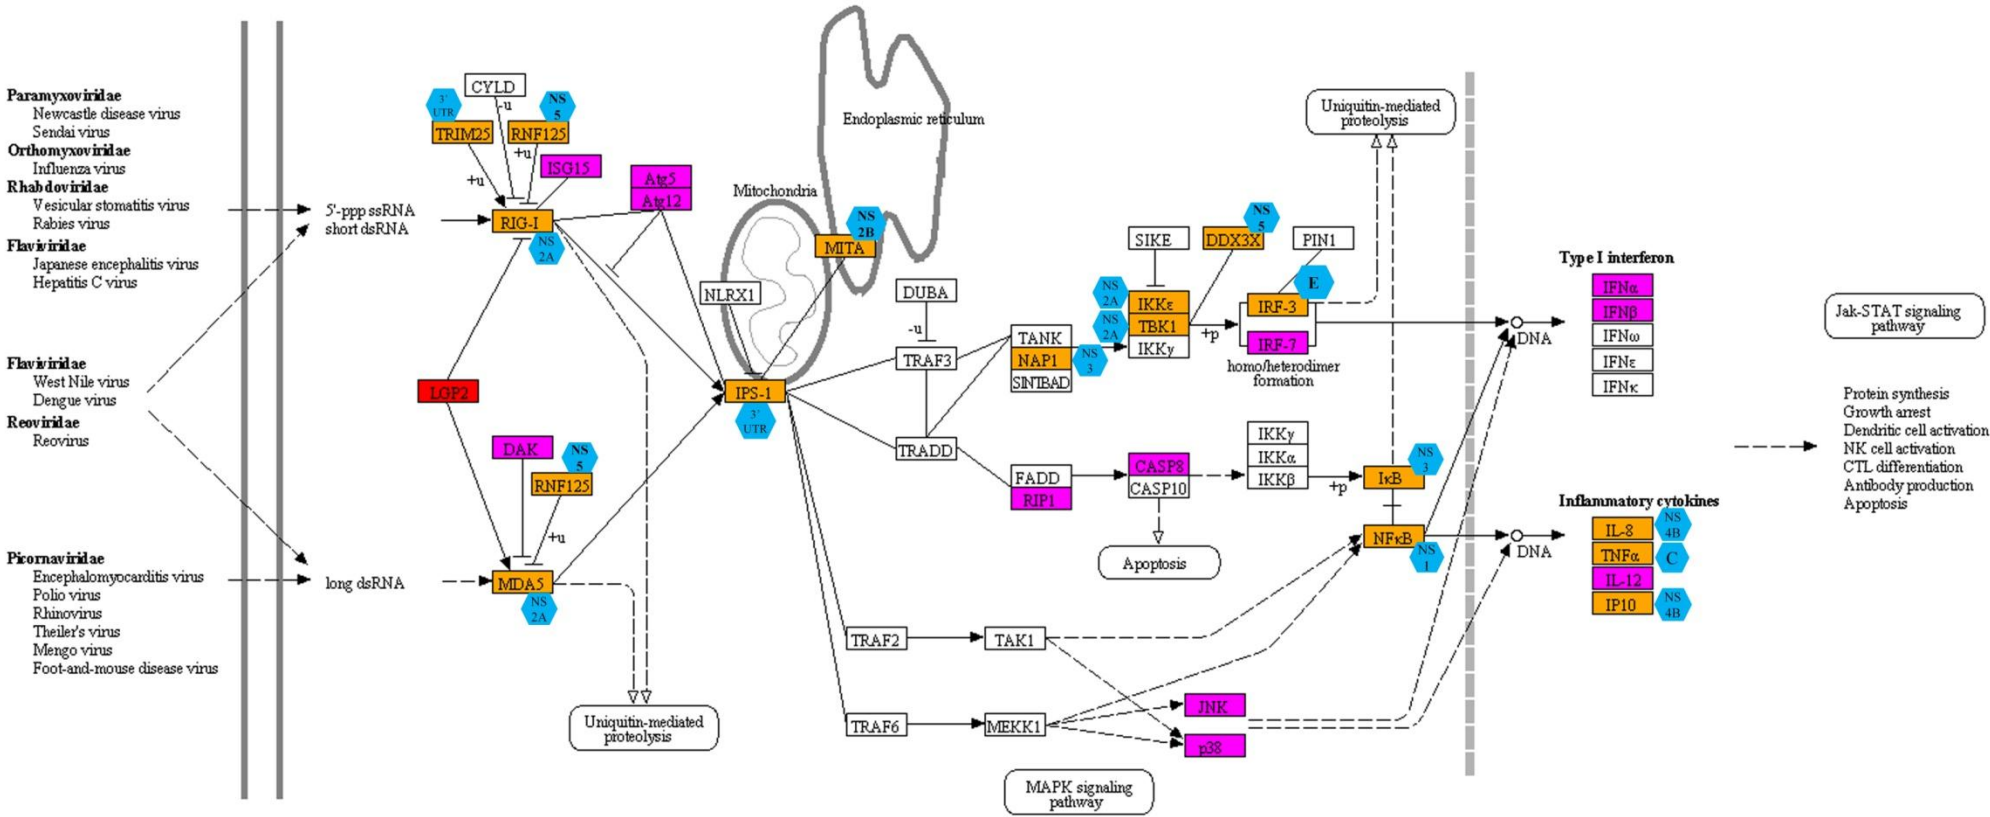

# T CELL RECEPTOR SIGNALING PATHWAY

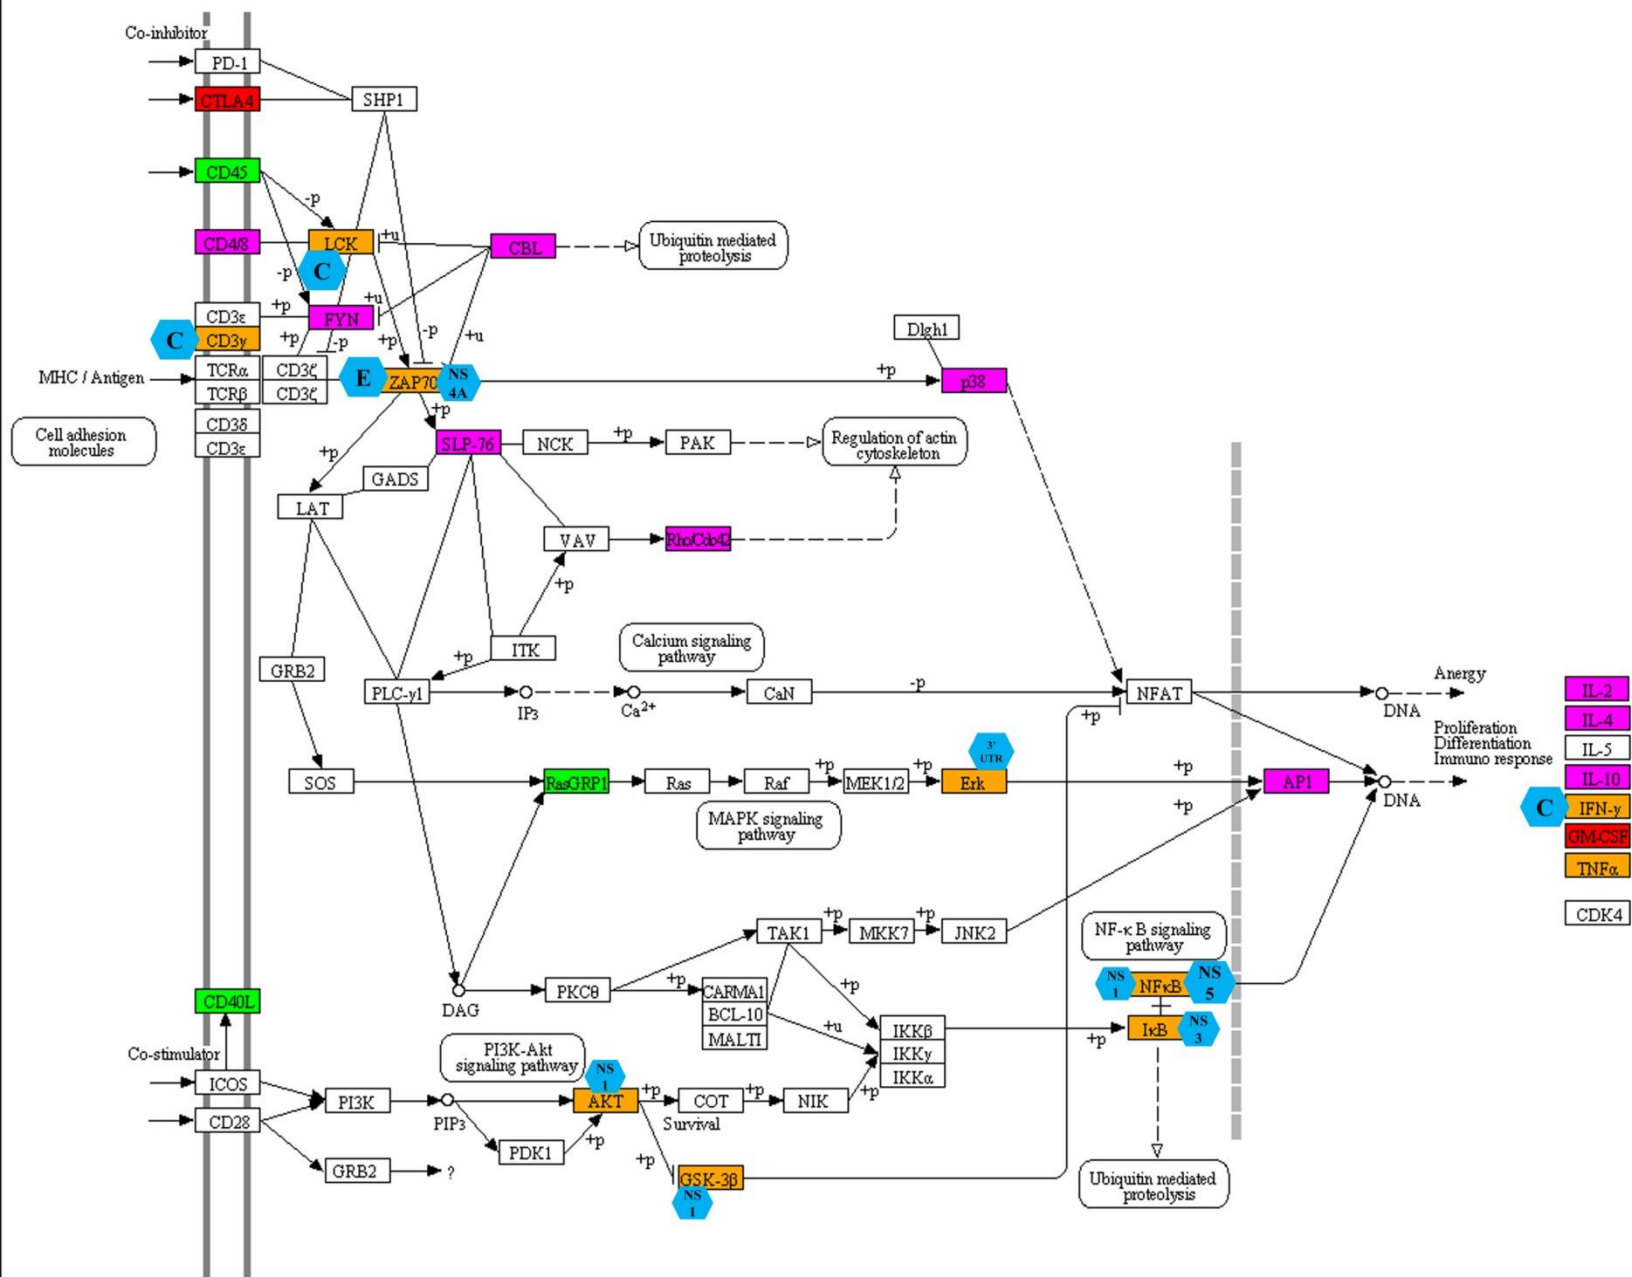

NOD-LIKE RECEPTOR SIGNALING PATHWAY

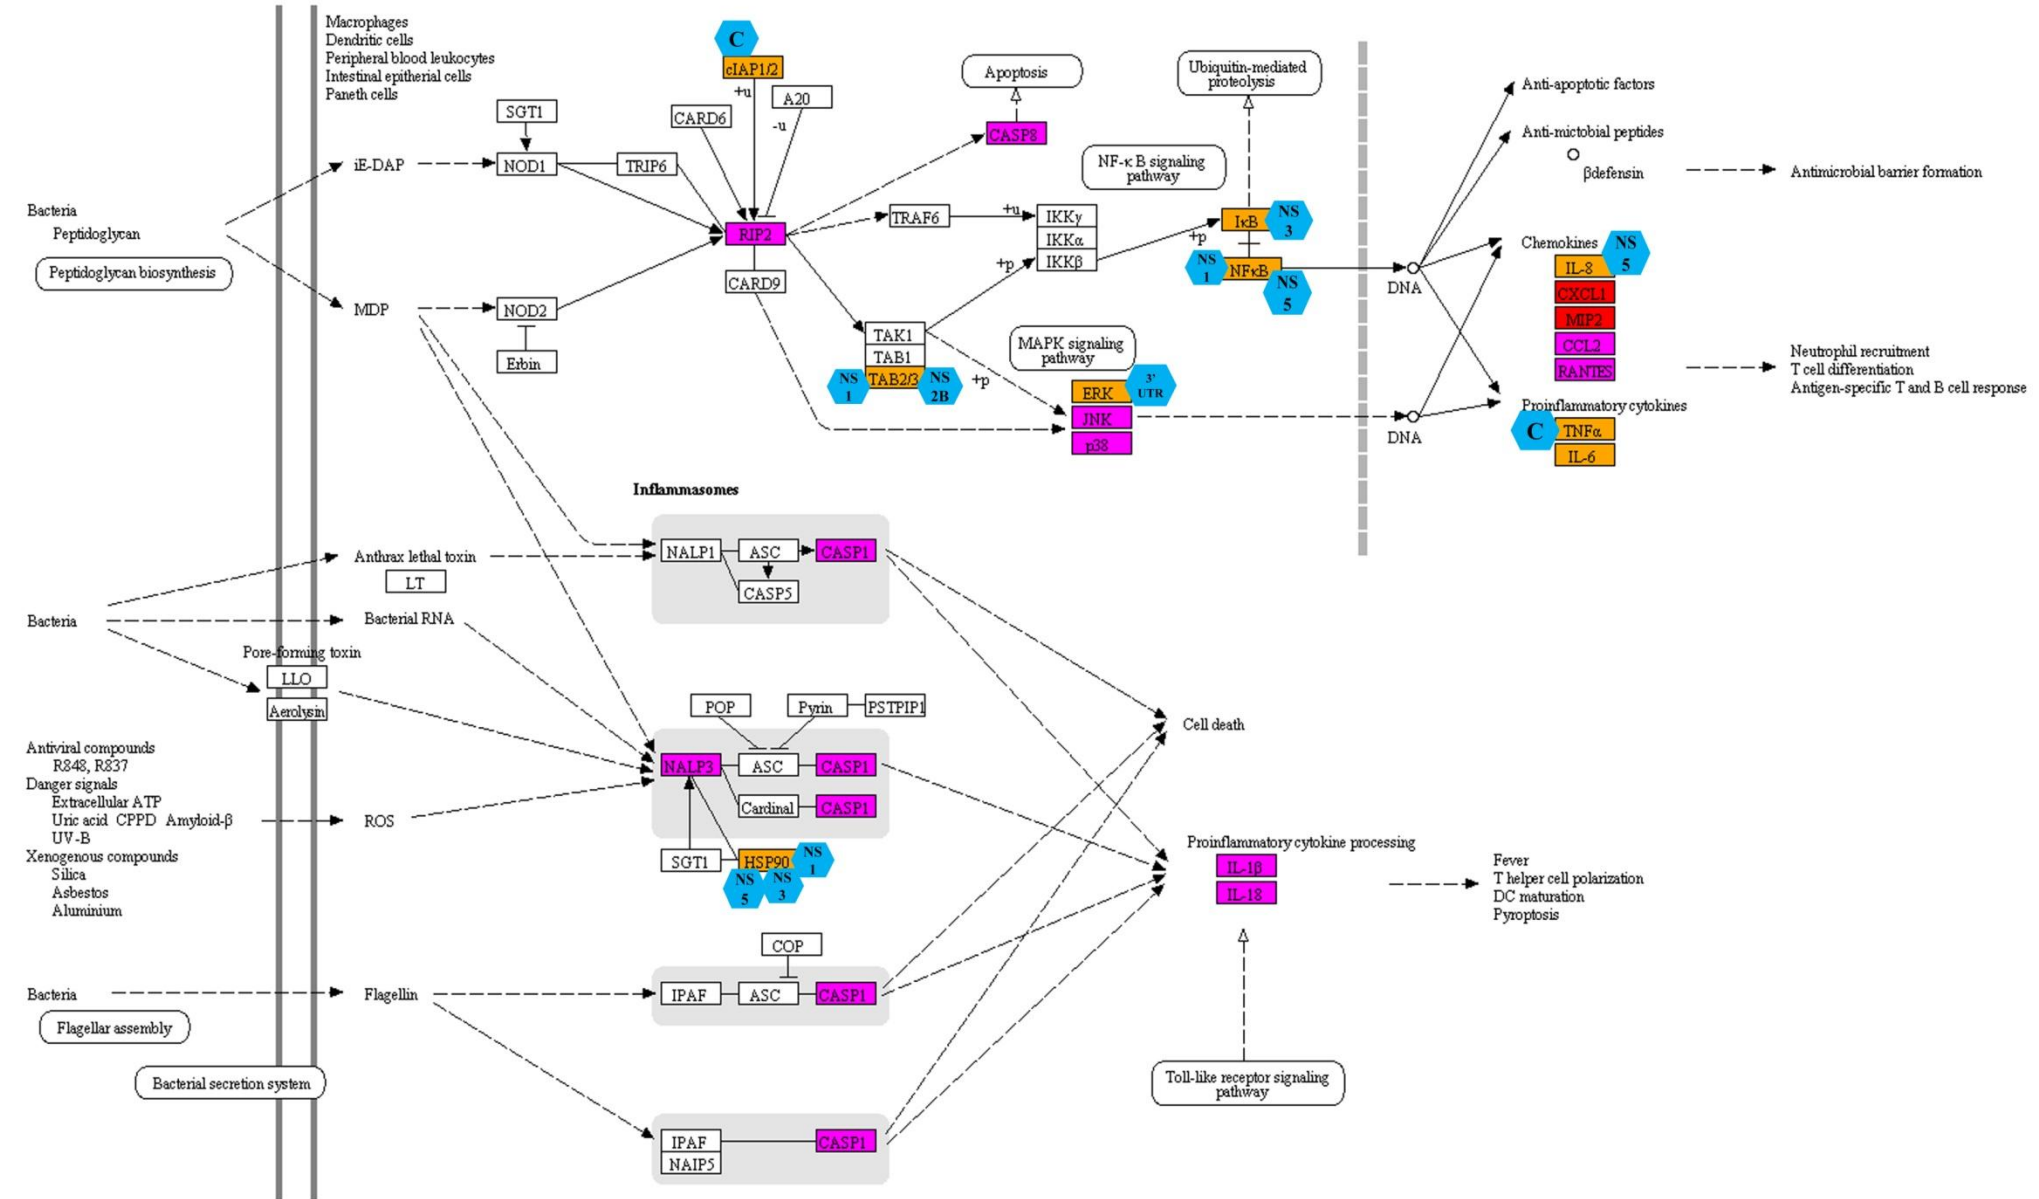





## NATURAL KILLER CELL MEDIATED CYTOTOXICITY

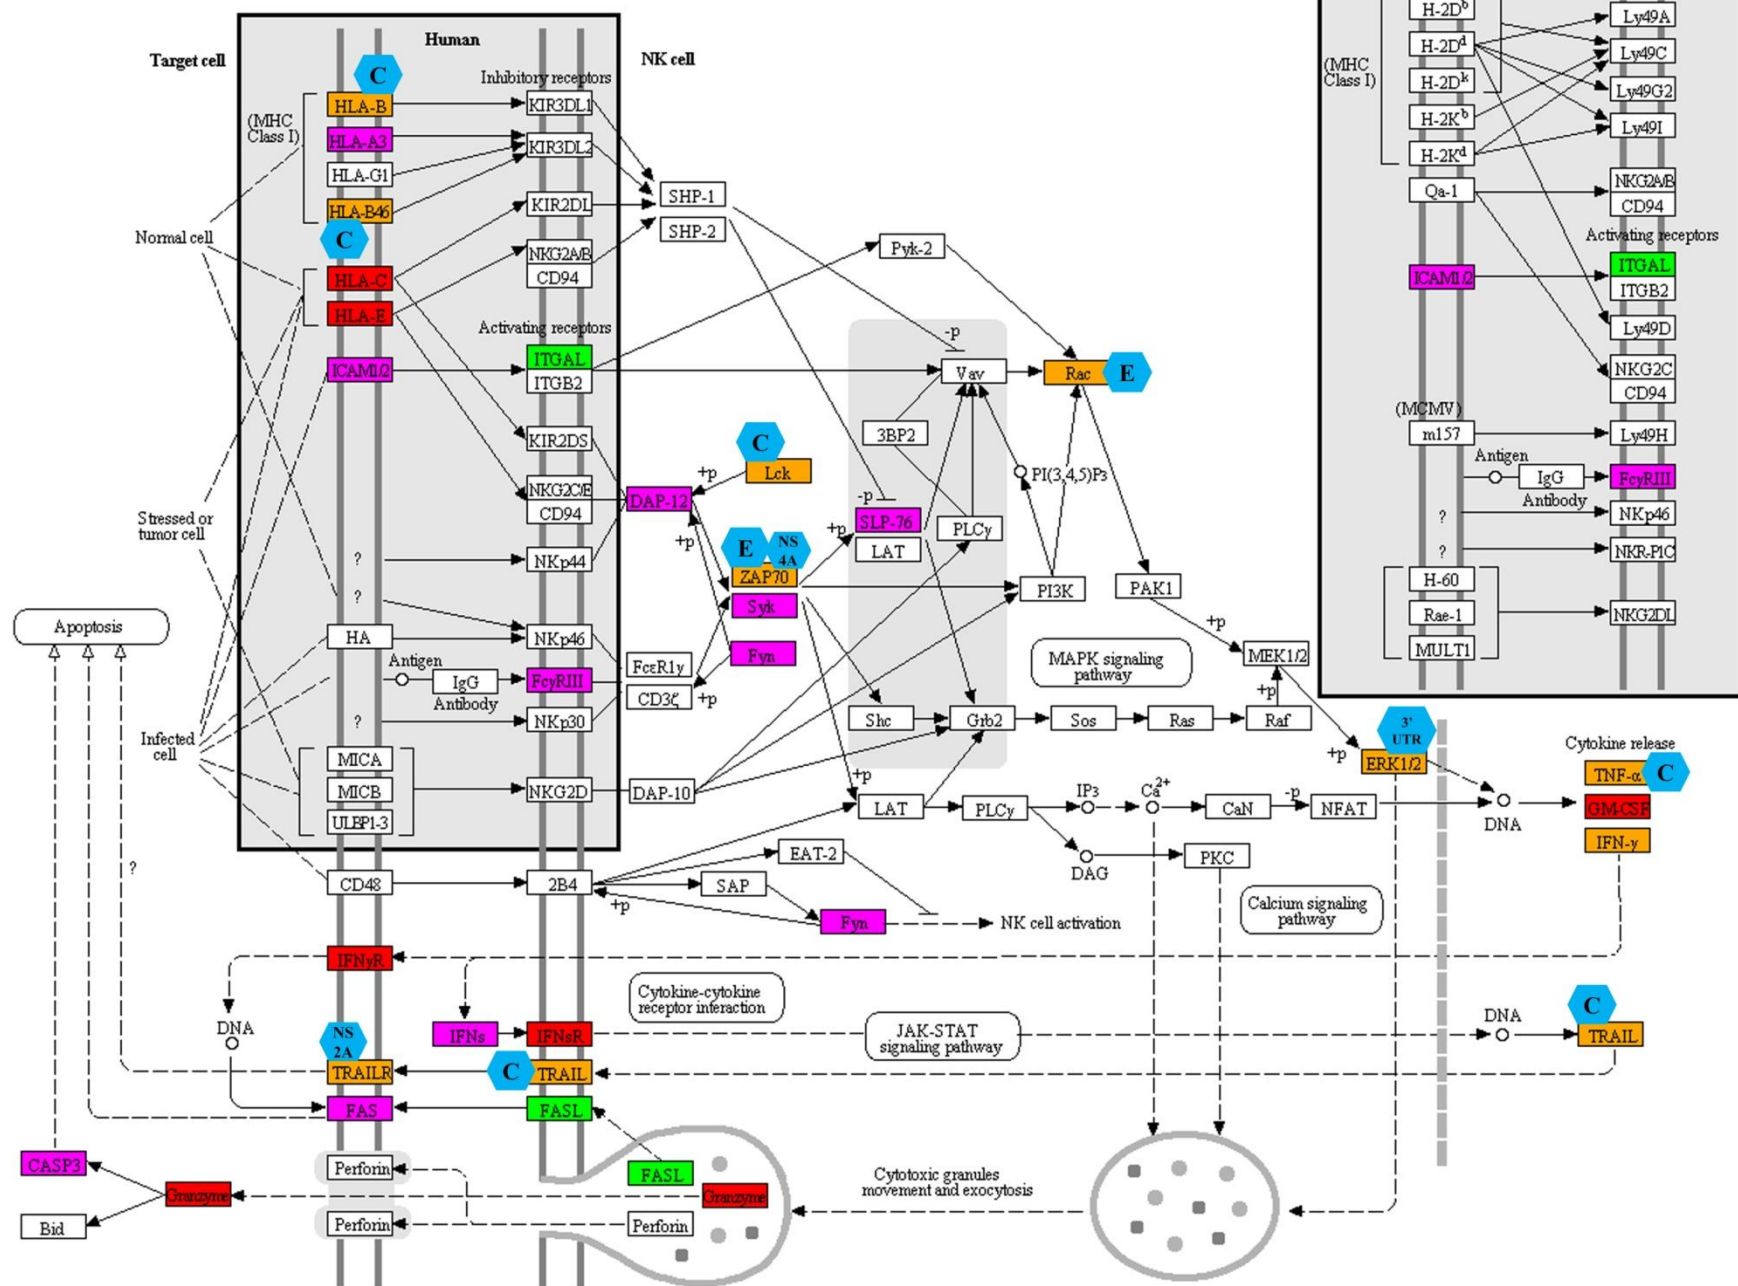

# ANTIGEN PROCESSING AND PRESENTATION

## MHC I pathway

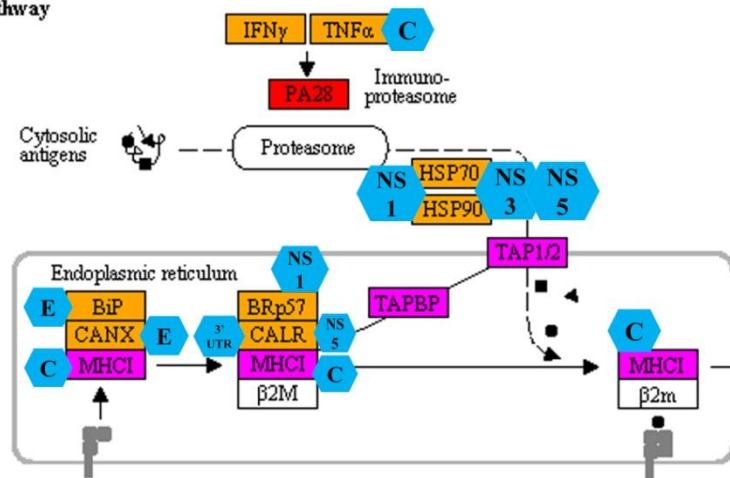

## MHC II pathway

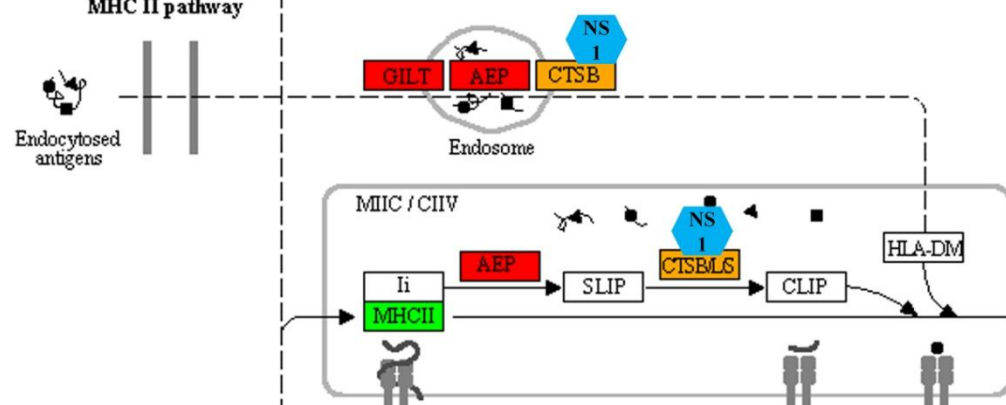

Nucleus

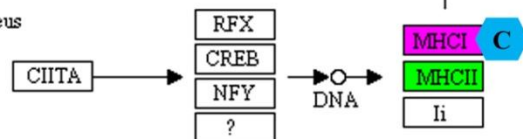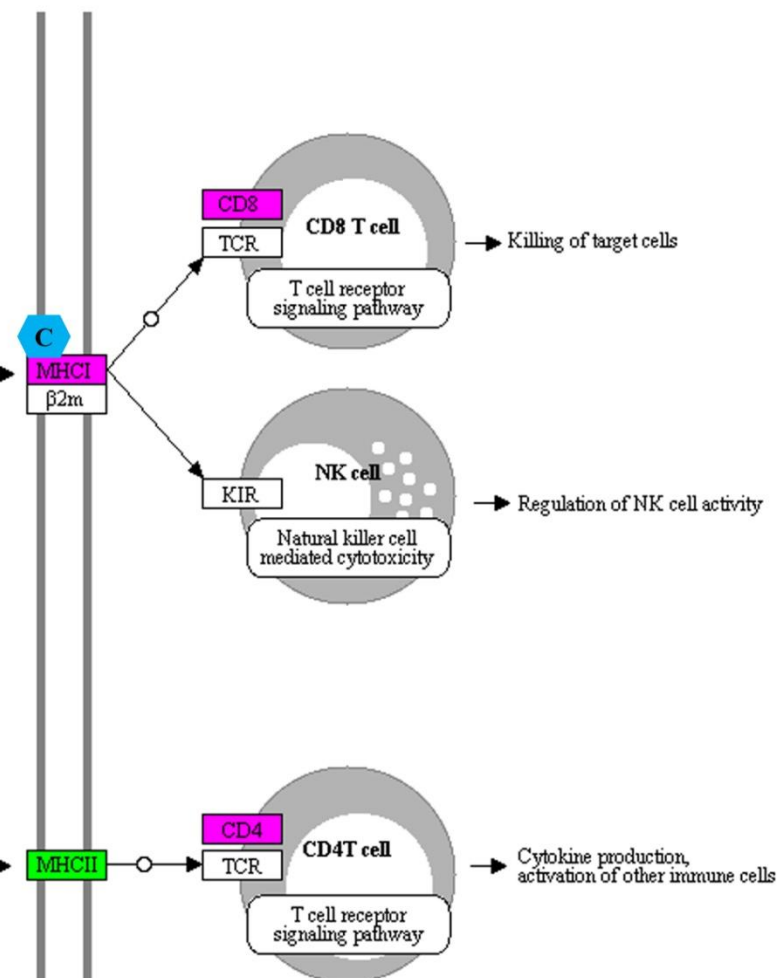

CYTOSOLIC DNA-SENSING PATHWAY

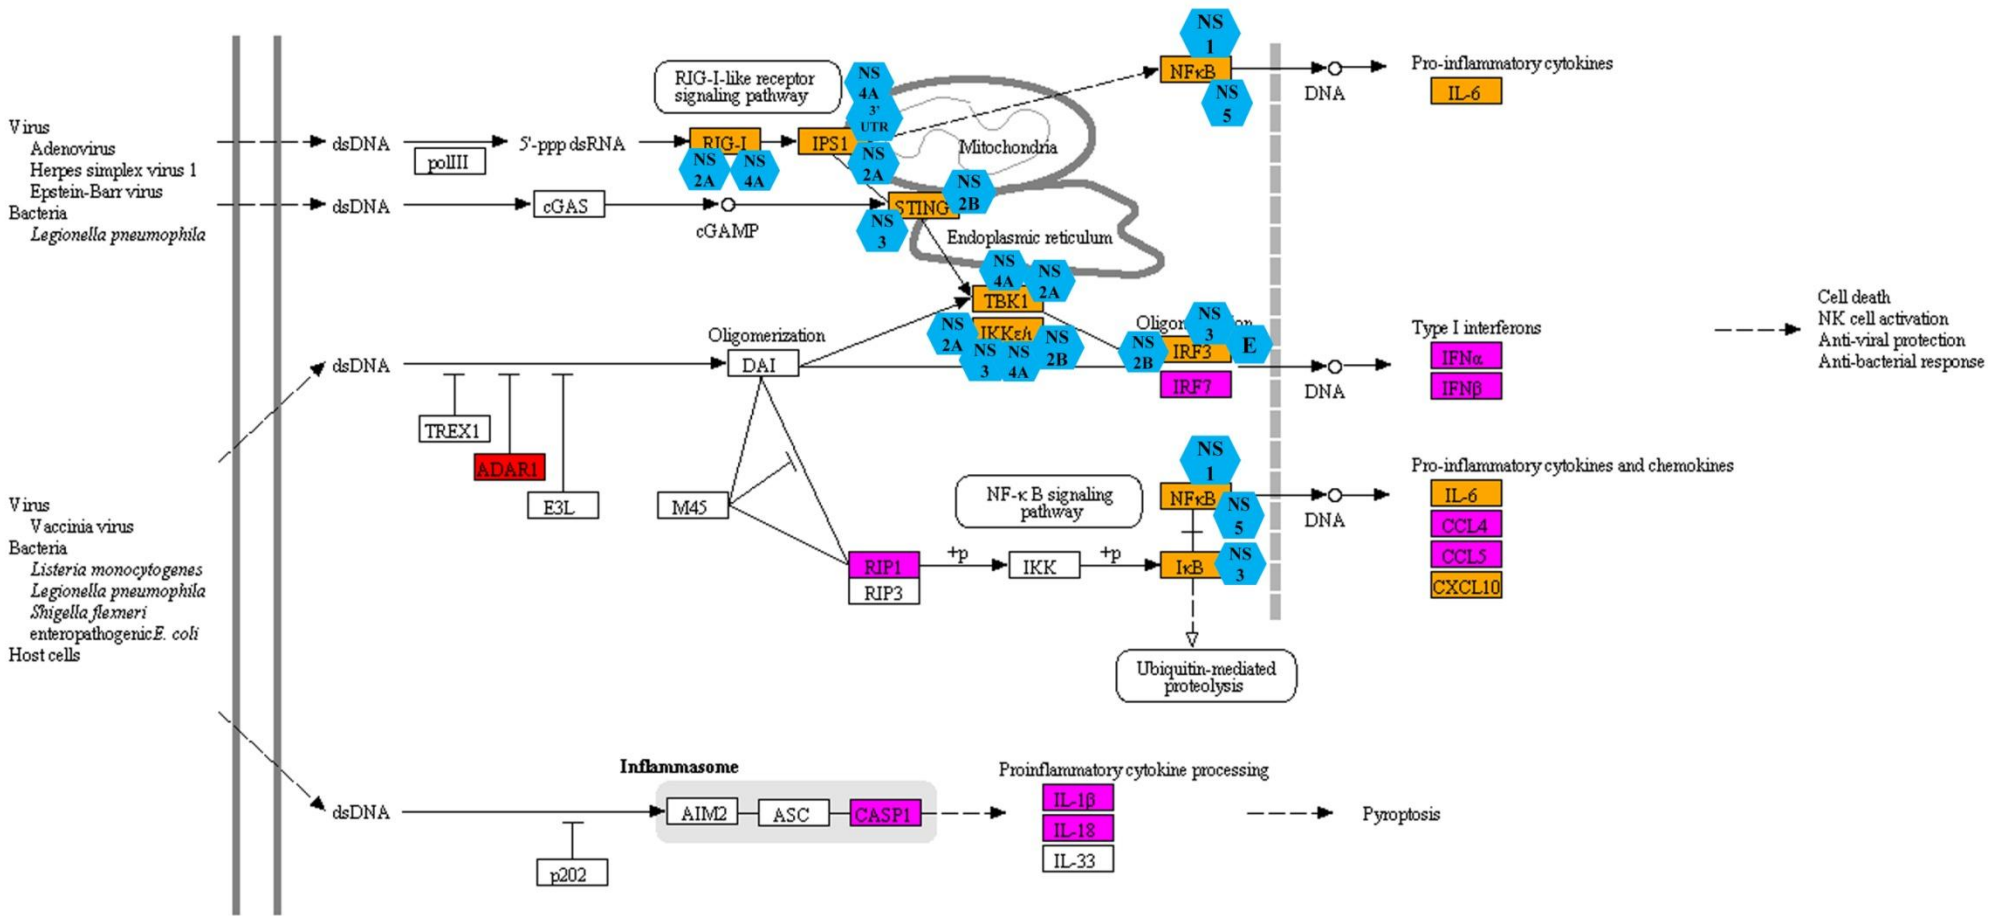



# LEUKOCYTE TRANSENDOTHELIAL MIGRATION

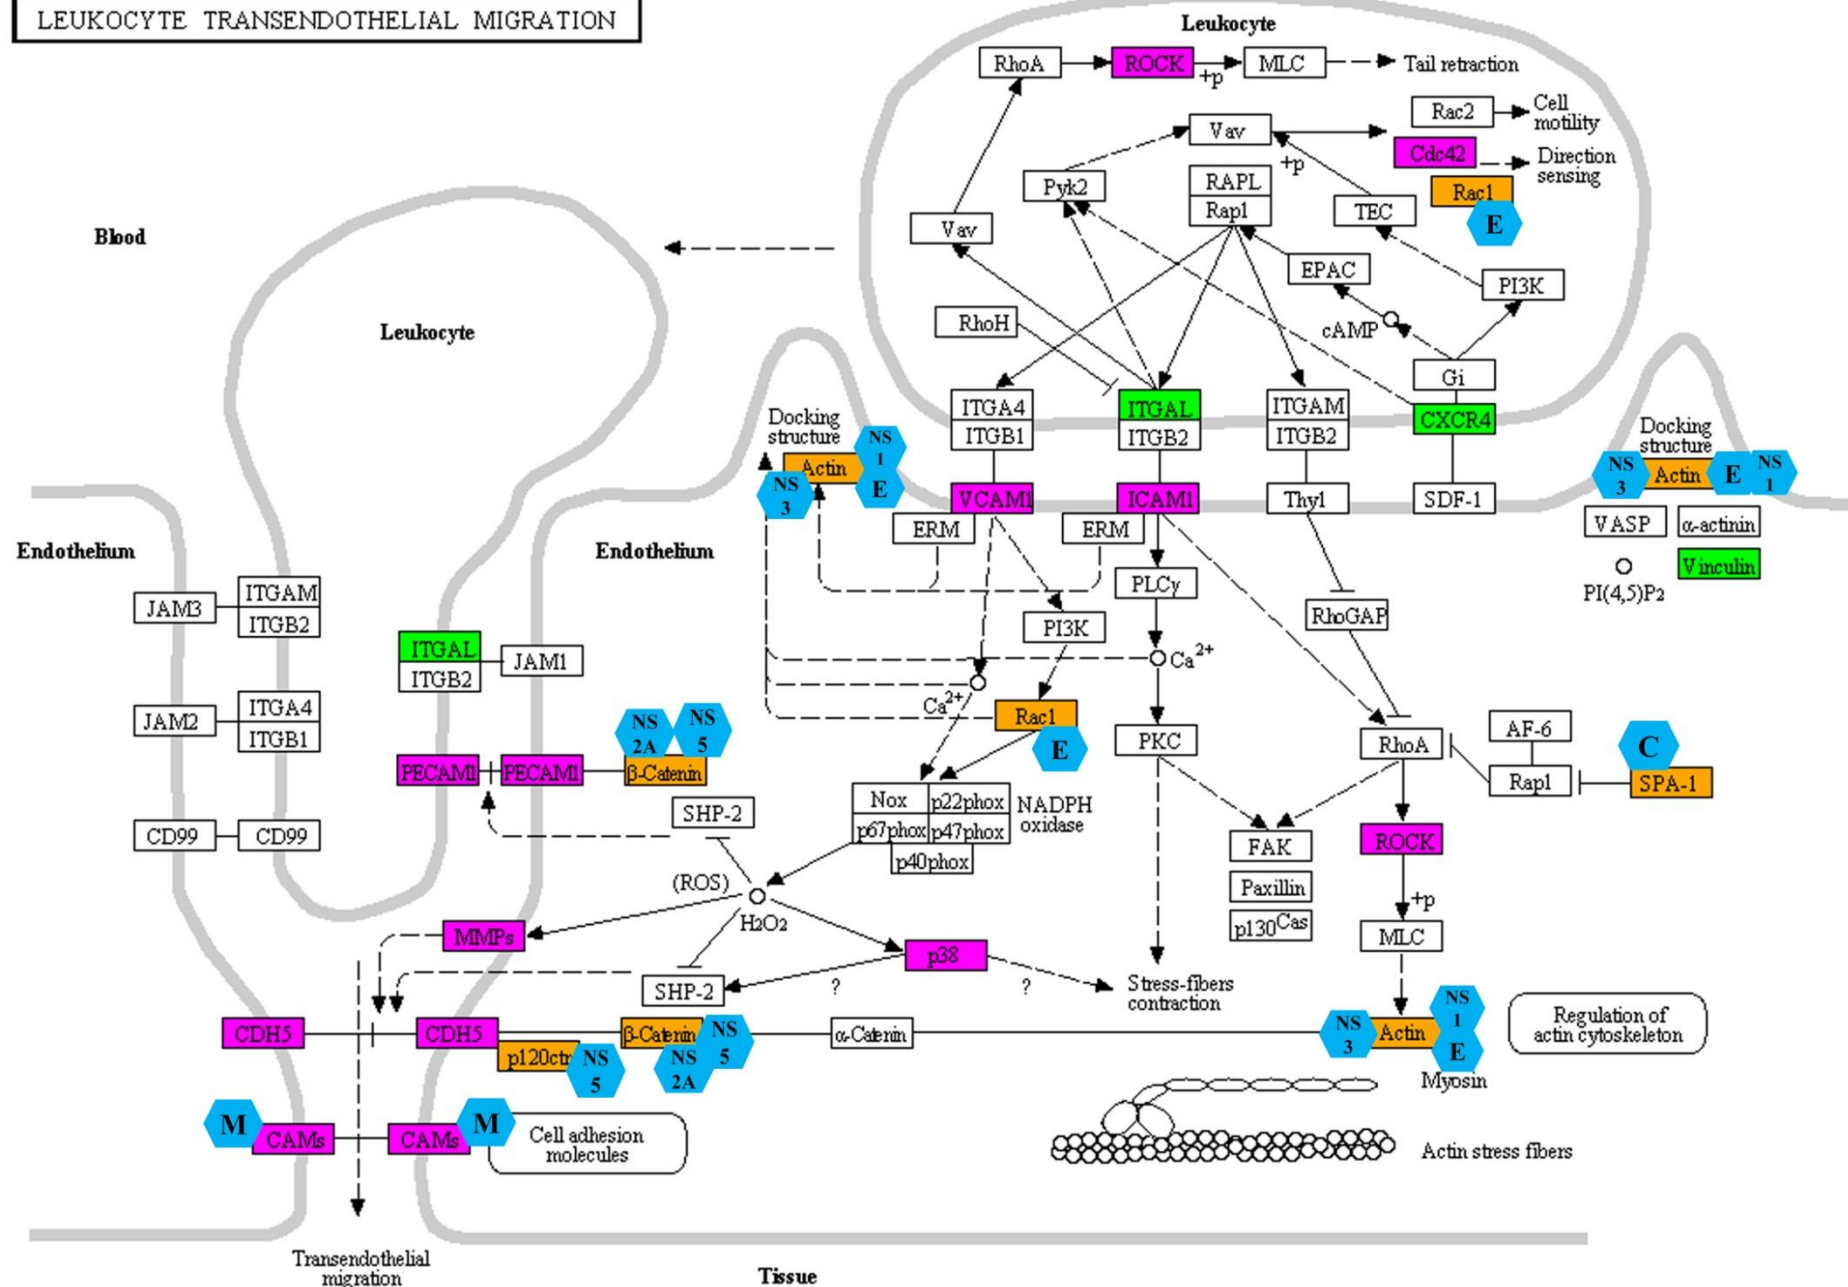

Supplement: S3 (10.1371/journal.pntd.0004965.s003) [file journal.pntd.0004965.s003]
