# Supplementary material for: DenHunt - A Comprehensive Database of the Intricate Network of Dengue-Human Interactions
Source: PLoS Negl Trop Dis. 2016 Sep 12;10(9):e0004965. doi: 10.1371/journal.pntd.0004965 (PMC5019383; doi:10.1371/journal.pntd.0004965)
Supplement: S1 Dataset — List of dengue virus interacting human genes that are identified to: i) interact directly with viral proteins, ii) indirectly affect dengue infection and iii) are reported to be DEGs (consistently up or down regulated in dengue infection) in at least 4 different publications in dengue infected cell lines or patients. This list is used for subsequent pathway and disease analyses. (XLSX) [file pntd.0004965.s004.xlsx]

## Sheet: Readme
		S1 Dataset:	List of dengue viral interacting human proteins used for pathway analysis. List of dengue virus interacting human genes that are identified to: i) interact directly with viral proteins, ii) indirectly affect dengue infection and iii) are reported to be DEGs (consistently up or down regulated in dengue infection) in at least 4 different publications in dengue infected cell lines or patients. This …
		Column headers
		Human Gene symbol	Gene symbol of Human protein
		Human Gene Entrez Id	Entrez gene id of the Human protein
		Type of interaction	Type of interaction the human gene is involved in.

## Sheet: Human-gene-list
Gene symbol	Entrez Id	Type of interaction
ALPL	249	differentially expressed, down																			ABCD3	direct		ACACA	indirect
FASLG	356	differentially expressed, down																			ACTA2	direct		ACTR2	indirect
ATF4	468	differentially expressed, down																			ACTB	direct		ADM	indirect
MS4A1	931	differentially expressed, down																			ACTG1	direct		AKT1	indirect
CD27	939	differentially expressed, down																			ACTG2	direct		ALPK3	indirect
CD40LG	959	differentially expressed, down																			ACY1	direct		AMPH	indirect
CD44	960	differentially expressed, down																			ADCK3	direct		ANGPT1	indirect
CDKN1C	1028	differentially expressed, down																			ADGRE2	direct		ANGPT2	indirect
HBEGF	1839	differentially expressed, down																			ADH1B	direct		ANGPTL3	indirect
EIF4B	1975	differentially expressed, down																			ADRA1D	direct		ANLN	indirect
FCER1A	2205	differentially expressed, down																			AFTPH	direct		AP1B1	indirect
KLRB1	3820	differentially expressed, down																			AGGF1	direct		AP1M1	indirect
NELL2	4753	differentially expressed, down																			AHSG	direct		AP2A1	indirect
PI3	5266	differentially expressed, down																			AIFM1	direct		AP2B1	indirect
VCL	7414	differentially expressed, down																			AKAP1	direct		AP2M1	indirect
CXCR4	7852	differentially expressed, down																			AKAP8L	direct		APOA1	indirect
IRS2	8660	differentially expressed, down																			AKAP9	direct		APOE	indirect
SELENBP1	8991	differentially expressed, down																			AKR7A3	direct		ARPC1B	indirect
DLG5	9231	differentially expressed, down																			AKT1	direct		ARPC3	indirect
CD83	9308	differentially expressed, down																			ALDH1L1	direct		ARRB1	indirect
KLF4	9314	differentially expressed, down																			ALDH3A2	direct		ATF6	indirect
SESN3	143686	differentially expressed, down																			ALDH7A1	direct		ATG12	indirect
BIRC3	330	differentially expressed, up																			ALDOB	direct		ATG5	indirect
BIRC5	332	differentially expressed, up																			AMBP	direct		ATP6AP1	indirect
ATF3	467	differentially expressed, up																			AMER1	direct		ATP6AP2	indirect
BCL2A1	597	differentially expressed, up																			ANKHD1	direct		ATP6V0A1	indirect
TNFRSF17	608	differentially expressed, up																			ANKRD12	direct		ATP6V0B	indirect
CFB	629	differentially expressed, up																			ANKRD50	direct		ATP6V0C	indirect
BUB1	699	differentially expressed, up																			ANP32B	direct		ATP6V0D1	indirect
SERPING1	710	differentially expressed, up																			ANXA2	direct		ATP6V1B1	indirect
C1QB	713	differentially expressed, up																			AP1M1	direct		ATP6V1B2	indirect
CALU	813	differentially expressed, up																			AP3B1	direct		ATP6V1C2	indirect
CAPZA2	830	differentially expressed, up																			APBB1IP	direct		ATP6V1G2	indirect
CBR1	873	differentially expressed, up																			APCS	direct		ATP6V1G3	indirect
CDC20	991	differentially expressed, up																			APEH	direct		ATP6V1H	indirect
CDC25A	993	differentially expressed, up																			APOA1	direct		AVPR1B	indirect
CKS2	1164	differentially expressed, up																			APOA2	direct		AXL	indirect
SLC31A2	1318	differentially expressed, up																			APOB	direct		BAX	indirect
CTSL	1514	differentially expressed, up																			APOE	direct		BBC3	indirect
DDOST	1650	differentially expressed, up																			APOH	direct		BCL2	indirect
DEFB1	1672	differentially expressed, up																			ARF1	direct		BCL2L1	indirect
DHFR	1719	differentially expressed, up																			ARF4	direct		BST2	indirect
FABP5	2171	differentially expressed, up																			ARF5	direct		C5	indirect
GLUL	2752	differentially expressed, up																			ARHGEF11	direct		CAMK1	indirect
CXCL2	2920	differentially expressed, up																			ARHGEF2	direct		CAPRIN1	indirect
CXCL3	2921	differentially expressed, up																			ARID2	direct		CASP1	indirect
HIST1H1C	3006	differentially expressed, up																			ARL6IP5	direct		CASP3	indirect
H2AFX	3014	differentially expressed, up																			ARNT	direct		CASP8	indirect
HIST1H2BD	3017	differentially expressed, up																			ATAD3A	direct		CASP9	indirect
HADH	3033	differentially expressed, up																			ATP1A1	direct		CBL	indirect
HLA-C	3107	differentially expressed, up																			ATP2A2	direct		CBLB	indirect
HMMR	3161	differentially expressed, up																			ATP5B	direct		CBLC	indirect
IDH2	3418	differentially expressed, up																			ATP6V0E1	direct		CCL2	indirect
IFI27	3429	differentially expressed, up																			AXIN1	direct		CCL3	indirect
SP110	3431	differentially expressed, up																			AZGP1	direct		CCL4	indirect
IL1RN	3557	differentially expressed, up																			AZI2	direct		CCL5	indirect
IRF4	3662	differentially expressed, up																			BAAT	direct		CCR5	indirect
ISG20	3669	differentially expressed, up																			BCKDHA	direct		CCR7	indirect
JUP	3728	differentially expressed, up																			BCL2L14	direct		CD14	indirect
KIF11	3832	differentially expressed, up																			BDH1	direct		CD4	indirect
KPNA2	3838	differentially expressed, up																			BIRC2	direct		CD73	indirect
LGALS3BP	3959	differentially expressed, up																			BMS1	direct		CD8	indirect
LY6E	4061	differentially expressed, up																			BOD1L1	direct		CD9	indirect
MAN1A1	4121	differentially expressed, up																			BRAT1	direct		CDC27	indirect
MCM2	4171	differentially expressed, up																			C1QA	direct		CDC42	indirect
MCM4	4173	differentially expressed, up																			C1S	direct		CDH1	indirect
MCM6	4175	differentially expressed, up																			C4A	direct		CDH5	indirect
MT1H	4496	differentially expressed, up																			C4B	direct		CDKN3	indirect
MT1X	4501	differentially expressed, up																			C4BPA	direct		CEBPB	indirect
MYBL2	4605	differentially expressed, up																			CAD	direct		CFD	indirect
NFE2	4778	differentially expressed, up																			CALCOCO2	direct		CHI3L1	indirect
OAS2	4939	differentially expressed, up																			CALR	direct		CHRNA2	indirect
PCNA	5111	differentially expressed, up																			CAMK2B	direct		CIB2	indirect
PLSCR1	5359	differentially expressed, up																			CAMLG	direct		CISH	indirect
POLE2	5427	differentially expressed, up																			CANX	direct		CLEC5A	indirect
PPIB	5479	differentially expressed, up																			CAPRIN1	direct		CLTB	indirect
EIF2AK2	5610	differentially expressed, up																			CAT	direct		CLTC	indirect
PSME2	5721	differentially expressed, up																			CAV1	direct		CNOT2	indirect
RFC4	5984	differentially expressed, up																			CCAR2	direct		COPB2	indirect
RNASE1	6035	differentially expressed, up																			CCDC66	direct		CRP	indirect
RPLP0	6175	differentially expressed, up																			CCDC88C	direct		CSF2RB	indirect
RPN2	6185	differentially expressed, up																			CCNT1	direct		CSNK1D	indirect
RRM1	6240	differentially expressed, up																			CCS	direct		CTSB	indirect
RRM2	6241	differentially expressed, up																			CD14	direct		CTSD	indirect
CCL8	6355	differentially expressed, up																			CD209	direct		CTSS	indirect
SDC1	6382	differentially expressed, up																			CD38	direct		CXCL10	indirect
UAP1	6675	differentially expressed, up																			CD3G	direct		CXCL11	indirect
SSR3	6747	differentially expressed, up																			CD59	direct		CXCL8	indirect
TCN2	6948	differentially expressed, up																			CDK1	direct		CXCL9	indirect
TGM2	7052	differentially expressed, up																			CDK9	direct		DCST2	indirect
TOP2A	7153	differentially expressed, up																			CENPQ	direct		DDIT3	indirect
TPD52	7163	differentially expressed, up																			CEP135	direct		DDX3X	indirect
TPM4	7171	differentially expressed, up																			CEP250	direct		DDX58	indirect
HSP90B1	7184	differentially expressed, up																			CEP63	direct		DIAPH1	indirect
TUBG1	7283	differentially expressed, up																			CES1	direct		DIAPH3	indirect
TYMS	7298	differentially expressed, up																			CFL1	direct		DLL1	indirect
WARS	7453	differentially expressed, up																			CGNL1	direct		DLL4	indirect
WRB	7485	differentially expressed, up																			CHEK1	direct		DNM1	indirect
CDC45	8318	differentially expressed, up																			CHML	direct		DNM2	indirect
HIST2H2AA3	8337	differentially expressed, up																			CLDN1	direct		DRD4	indirect
HIST1H2BH	8345	differentially expressed, up																			CLIC2	direct		DST	indirect
HIST1H2BC	8347	differentially expressed, up																			CLK1	direct		EDN1	indirect
HIST2H4A	8370	differentially expressed, up																			CLU	direct		EEA1	indirect
HESX1	8820	differentially expressed, up																			CNOT1	direct		EGR1	indirect
GGH	8836	differentially expressed, up																			COBLL1	direct		EIF2AK1	indirect
CCNB2	9133	differentially expressed, up																			COIL	direct		EIF2AK3	indirect
EXO1	9156	differentially expressed, up																			COL12A1	direct		EIF2S1	indirect
PTTG1	9232	differentially expressed, up																			COL18A1	direct		EIF3A	indirect
UBE2L6	9246	differentially expressed, up																			COMMD1	direct		EIF5B	indirect
TRIP13	9319	differentially expressed, up																			COPG2	direct		ELP2	indirect
OTOF	9381	differentially expressed, up																			COPS2	direct		ENG	indirect
KIF23	9493	differentially expressed, up																			CORO1A	direct		ENO1	indirect
MAGED1	9500	differentially expressed, up																			CSE1L	direct		EPAS1	indirect
PDIA4	9601	differentially expressed, up																			CSNK2A1	direct		EPN1	indirect
KIAA0101	9768	differentially expressed, up																			CST3	direct		EPN2	indirect
TRIM14	9830	differentially expressed, up																			CTNNB1	direct		EPS15	indirect
SLC35B1	10237	differentially expressed, up																			CTNND1	direct		ERC1	indirect
NDC80	10403	differentially expressed, up																			CTSB	direct		ERN1	indirect
IFI44	10561	differentially expressed, up																			CUL3	direct		ETNK2	indirect
IGF2BP3	10643	differentially expressed, up																			CUL7	direct		EXOC7	indirect
RUVBL2	10856	differentially expressed, up																			CUTA	direct		F2	indirect
PDIA5	10954	differentially expressed, up																			CXCL10	direct		F2R	indirect
IFI44L	10964	differentially expressed, up																			CXCL8	direct		F3	indirect
UBE2C	11065	differentially expressed, up																			CYTIP	direct		FAS	indirect
FICD	11153	differentially expressed, up																			DAXX	direct		FASL	indirect
AKAP2	11217	differentially expressed, up																			DCTN1	direct		FASTKD5	indirect
USP18	11274	differentially expressed, up																			DCTN2	direct		FCGR3A	indirect
ELL2	22936	differentially expressed, up																			DCUN1D4	direct		FDFT1	indirect
TPX2	22974	differentially expressed, up																			DDX24	direct		FES	indirect
MMD	23531	differentially expressed, up																			DDX3X	direct		FH	indirect
SDF2L1	23753	differentially expressed, up																			DDX5	direct		FOS	indirect
MTHFD1L	25902	differentially expressed, up																			DDX58	direct		FYN	indirect
PTTG3P	26255	differentially expressed, up																			DDX6	direct		G3BP1	indirect
LAMP3	27074	differentially expressed, up																			DENND1C	direct		G3BP2	indirect
UBE2S	27338	differentially expressed, up																			DERL2	direct		G6PD	indirect
RACGAP1	29127	differentially expressed, up																			DHCR7	direct		GALNT10	indirect
GMPPB	29925	differentially expressed, up																			DHX15	direct		GANAB	indirect
G0S2	50486	differentially expressed, up																			DHX9	direct		GBP1	indirect
GMNN	51053	differentially expressed, up																			DIRAS2	direct		GCH1	indirect
SAR1B	51128	differentially expressed, up																			DNAAF5	direct		GCLC	indirect
HERC5	51191	differentially expressed, up																			DNM2	direct		GCLM	indirect
NUSAP1	51203	differentially expressed, up																			DNTTIP2	direct		GNB2L1	indirect
TLR7	51284	differentially expressed, up																			DPM1	direct		GORASP1	indirect
FKBP11	51303	differentially expressed, up																			DSCR3	direct		GSX1	indirect
UBE2J1	51465	differentially expressed, up																			DST	direct		HAVCR1	indirect
GINS2	51659	differentially expressed, up																			DYNC1H1	direct		HIF1A	indirect
RIN2	54453	differentially expressed, up																			DYNLT1	direct		HIP1	indirect
CEP55	55165	differentially expressed, up																			EAF1	direct		HIP1R	indirect
HES4	57801	differentially expressed, up																			EAF2	direct		HK2	indirect
SPCS3	60559	differentially expressed, up																			EARS2	direct		HLA-A	indirect
RTP4	64108	differentially expressed, up																			ECHDC1	direct		HLA-B	indirect
NCAPG	64151	differentially expressed, up																			ECI2	direct		HLA-DRB1	indirect
TOR3A	64222	differentially expressed, up																			EEF1A1	direct		HMGB1	indirect
CENPM	79019	differentially expressed, up																			EEF1B2	direct		HMGCR	indirect
SLC25A23	79085	differentially expressed, up																			EEF1G	direct		HMGCS1	indirect
CRELD2	79174	differentially expressed, up																			EID1	direct		HMOX1	indirect
ITM2C	81618	differentially expressed, up																			EIF2A	direct		HNRNPH1	indirect
HIST1H2BK	85236	differentially expressed, up																			EIF4A1	direct		HPSE	indirect
TRIM5	85363	differentially expressed, up																			EIF4G2	direct		HPX	indirect
SIGLEC11	114132	differentially expressed, up																			EMILIN1	direct		HRNR	indirect
TRIM69	140691	differentially expressed, up																			ENO1	direct		HSP90AA1	indirect
DSPA2D	144383	differentially expressed, up																			ENOX2	direct		HSPA4	indirect
CCR2	729230	differentially expressed, up																			ENTPD5	direct		HSPA5	indirect
ACTG1	71	direct																			ERC1	direct		HSPD1	indirect
ACTG2	72	direct																			ERLIN2	direct		HTR2A	indirect
ACY1	95	direct																			EXOC1	direct		ICAM1	indirect
ADH1B	125	direct																			EXOSC9	direct		ICAM1	indirect
ADRA1D	146	direct																			F2	direct		IDO1	indirect
ALDH3A2	224	direct																			F8	direct		IFI6	indirect
ALDOB	229	direct																			FAF2	direct		IFI6	indirect
AMBP	259	direct																			FAH	direct		IFIH1	indirect
APEH	327	direct																			FAM132A	direct		IFIT1	indirect
BIRC2	329	direct																			FAM184A	direct		IFIT2	indirect
APOA2	336	direct																			FAM192A	direct		IFIT3	indirect
APOB	338	direct																			FASN	direct		IFIT5	indirect
APOH	350	direct																			FGA	direct		IFITM1	indirect
ARF5	381	direct																			FGB	direct		IFITM2	indirect
ARNT	405	direct																			FH	direct		IFITM3	indirect
ATP2A2	488	direct																			FLNA	direct		IFNA1	indirect
ALDH7A1	501	direct																			FMR1	direct		IFNA2	indirect
ATP5B	506	direct																			FN1	direct		IFNB1	indirect
AZGP1	563	direct																			FUNDC1	direct		IFNG	indirect
BAAT	570	direct																			FUNDC2	direct		IFNLR1	indirect
BCKDHA	593	direct																			FYB	direct		IFN-β	indirect
BDH1	622	direct																			G3BP1	direct		IL10	indirect
CAD	790	direct																			G3BP2	direct		IL10RA	indirect
CALR	811	direct																			GAB1	direct		IL12A	indirect
CAMK2B	816	direct																			GAPDH	direct		IL12B	indirect
CAMLG	819	direct																			GBF1	direct		IL18	indirect
CAT	847	direct																			GC	direct		IL18RAP	indirect
CAV1	857	direct																			GCN1L1	direct		IL1B	indirect
SERPINH1	871	direct																			GGA1	direct		IL2	indirect
CCNT1	904	direct																			GOLGA2	direct		IL2RA	indirect
CD3G	917	direct																			GOLGB1	direct		IL4	indirect
ENTPD5	957	direct																			GPI	direct		IL6	indirect
CLIC2	1193	direct																			GPX2	direct		IL7	indirect
CLK1	1195	direct																			GSK3B	direct		IRF1	indirect
COL12A1	1303	direct																			GTPBP4	direct		IRF3	indirect
CST3	1471	direct																			H3F3C	direct		IRF7	indirect
CTNND1	1500	direct																			HACD3	direct		IRF9	indirect
DCTN1	1639	direct																			HAUS4	direct		ISG15	indirect
DDX5	1655	direct																			HAX1	direct		ITGB3	indirect
DDX6	1656	direct																			HBA1	direct		ITSN2	indirect
DHCR7	1717	direct																			HBB	direct		JAK2	indirect
DYNC1H1	1778	direct																			HEATR1	direct		JAK3	indirect
EEF1G	1937	direct																			HIST1H2BA	direct		JNK	indirect
EIF4G2	1982	direct																			HIST1H2BB	direct		JUN	indirect
F8	2157	direct																			HIST1H4H	direct		KDR	indirect
FAH	2184	direct																			HIST2H2AC	direct		LCP2	indirect
FGB	2244	direct																			HIST2H2BE	direct		LDLR	indirect
FYB	2533	direct																			HIST2H3C	direct		LGALS9	indirect
GC	2638	direct																			HIST4H4	direct		LILRB1	indirect
GOLGA2	2801	direct																			HLA-B	direct		LRIG3	indirect
GOLGB1	2804	direct																			HMGB1	direct		MAK	indirect
GPX2	2877	direct																			HMGXB3	direct		MAP1LC3A	indirect
GSK3B	2932	direct																			HMOX1	direct		MAP4K5	indirect
HIST1H2BB	3018	direct																			HNRNPA1	direct		MAPK1	indirect
SERPIND1	3053	direct																			HNRNPA2B1	direct		MAPK11	indirect
HNRNPA1	3178	direct																			HNRNPC	direct		MAPK14	indirect
HPN	3249	direct																			HNRNPF	direct		MAPK3	indirect
ILF3	3609	direct																			HNRNPK	direct		MAPK8IP2	indirect
ITIH3	3699	direct																			HOOK1	direct		MIF	indirect
KPNB1	3837	direct																			HP	direct		MIR146A	indirect
KPNA3	3839	direct																			HPN	direct		MIR30E	indirect
LAMB1	3912	direct																			HPX	direct		MIRLET7C	indirect
MAOB	4129	direct																			HRK	direct		MMP2	indirect
MBL2	4153	direct																			HSD17B12	direct		MMP2	indirect
MBP	4155	direct																			HSP90AA1	direct		MMP3	indirect
MTF1	4520	direct																			HSP90AB1	direct		MMP9	indirect
MYH9	4627	direct																			HSPA1A	direct		MUC2	indirect
NF1	4763	direct																			HSPA5	direct		MVD	indirect
NID1	4811	direct																			HSPA8	direct		MX1	indirect
NME3	4832	direct																			HSPB1	direct		NAA35	indirect
NUMA1	4926	direct																			HSPD1	direct		NACA	indirect
PCK2	5106	direct																			IFI16	direct		NAPA	indirect
PCM1	5108	direct																			IFIH1	direct		NEK6	indirect
PCNT	5116	direct																			IFNG	direct		NFE2L2	indirect
SLC25A3	5250	direct																			IGF2BP2	direct		NFKB1	indirect
PKM	5315	direct																			IKBKE	direct		NFKB2	indirect
PLEC	5339	direct																			IL6	direct		NFKBIA	indirect
EXOSC9	5393	direct																			ILF2	direct		NLRP3	indirect
RELN	5649	direct																			ILF3	direct		NOS2	indirect
PTB	5725	direct																			IMPDH2	direct		NOTCH4	indirect
ABCD3	5825	direct																			IPO13	direct		NPR2	indirect
RPL5	6125	direct																			IPO4	direct		NQO1	indirect
RPL6	6128	direct																			IRF3	direct		NRG1	indirect
RPL7	6129	direct																			ITIH3	direct		OAS1	indirect
RPL12	6136	direct																			KAT2B	direct		OAS3	indirect
RPL19	6143	direct																			KDELR1	direct		OASL	indirect
RPL21	6144	direct																			KIAA0368	direct		OCLN	indirect
RPL24	6152	direct																			KIAA1524	direct		OPHN1	indirect
RPL31	6160	direct																			KIF17	direct		OSM	indirect
MRPL12	6182	direct																			KIF1B	direct		PACSIN3	indirect
RPS2	6187	direct																			KNG1	direct		PARP1	indirect
RPS4X	6191	direct																			KNTC1	direct		PDIA2	indirect
RPS7	6201	direct																			KPNA3	direct		PDIA3	indirect
RPS8	6202	direct																			KPNB1	direct		PECAM1	indirect
RPS18	6222	direct																			KRT8	direct		PFKFB3	indirect
RPS23	6228	direct																			KTN1	direct		PHF2	indirect
RPS24	6229	direct																			LAMB1	direct		PHF20	indirect
S100A6	6277	direct																			LCK	direct		PHOSPHO2	indirect
RANTES	6352	direct																			LMNA	direct		PIAS1	indirect
SEPP1	6414	direct																			LOC642846	direct		PICK1	indirect
SIAH2	6478	direct																			LRRFIP1	direct		PIP4K2B	indirect
SIPA1	6494	direct																			LSM1	direct		PIP5K1A	indirect
SLC1A5	6510	direct																			LSR	direct		PKIB	indirect
SLC16A1	6566	direct																			LUC7L3	direct		PKN3	indirect
SLC25A1	6576	direct																			M6PR	direct		PLA2G7	indirect
SPTBN2	6712	direct																			MAD2L1	direct		PLAT	indirect
SSB	6741	direct																			MAGED2	direct		PLIN3	indirect
SURF4	6836	direct																			MAOB	direct		PLK3	indirect
TARBP2	6895	direct																			MAPK1	direct		PMAIP1	indirect
TESK1	7016	direct																			MAPRE2	direct		PML	indirect
TIA1	7072	direct																			MATR3	direct		PNLIPRP1	indirect
TIAL1	7073	direct																			MAVS	direct		PPP1R15A	indirect
TMF1	7110	direct																			MBL2	direct		PPP2R2A	indirect
TMOD1	7111	direct																			MBP	direct		PRG4	indirect
TP53BP2	7159	direct																			MFAP3L	direct		PRKCD	indirect
TP73	7161	direct																			MIR548G	direct		PRKDC	indirect
TTC1	7265	direct																			MLPH	direct		PRKRA	indirect
UBE2I	7329	direct																			MMS19	direct		PROC	indirect
UBE3A	7337	direct																			MPND	direct		PRR12	indirect
VDAC3	7419	direct																			MPRIP	direct		PSMB9	indirect
XPA	7507	direct																			MRPL12	direct		PTGER2	indirect
XPO1	7514	direct																			MRPS15	direct		PTGER4	indirect
TAF15	8148	direct																			MT2A	direct		PTGS2	indirect
COIL	8161	direct																			MTERF4	direct		RAB11B	indirect
USP9X	8239	direct																			MTF1	direct		RAB29	indirect
HIST2H2AC	8338	direct																			MTHFD1	direct		RAB3A	indirect
SLC25A11	8402	direct																			MTOR	direct		RAB3D	indirect
CUL3	8452	direct																			MTRNR2L1	direct		RAB5A	indirect
RNASET2	8635	direct																			MX1	direct		RAB8A	indirect
GBF1	8729	direct																			MYCBP2	direct		RAB8B	indirect
TNFRSF10B	8795	direct																			MYH14	direct		RAC1	indirect
TAX1BP1	8887	direct																			MYH9	direct		REL	indirect
RPL14	9045	direct																			NAP1L1	direct		RELA	indirect
USP10	9100	direct																			NCAPG2	direct		RELB	indirect
ZW10	9183	direct																			NCL	direct		RIPK1	indirect
NUMBL	9253	direct																			NCLN	direct		RIPK2	indirect
SRSF11	9295	direct																			NECAB2	direct		RNASEK	indirect
COPS2	9318	direct																			NF1	direct		RNASEL	indirect
TRIP11	9321	direct																			NFKB1	direct		ROCK1	indirect
TECR	9524	direct																			NFKBIA	direct		RPSA	indirect
PRDX6	9588	direct																			NID1	direct		RSAD2	indirect
CYTIP	9595	direct																			NLRP2	direct		SCARB1	indirect
TRAF4	9618	direct																			NME3	direct		SDC2	indirect
CEP135	9662	direct																			NOC4L	direct		SEC61B	indirect
IPO13	9670	direct																			NOS2	direct		SELE	indirect
BMS1	9790	direct																			NRBP1	direct		SERPINE1	indirect
CUL7	9820	direct																			NRGN	direct		SHPK	indirect
ARHGEF11	9826	direct																			NUCKS1	direct		SIK3	indirect
MFAP3L	9848	direct																			NUMA1	direct		SLC2A1	indirect
TELO2	9894	direct																			NUMBL	direct		SLC5A12	indirect
OXSR1	9943	direct																			NUP50	direct		SMAD7	indirect
CCS	9973	direct																			OS9	direct		SOCS1	indirect
TOM1L1	10040	direct																			OXNAD1	direct		SOCS3	indirect
TSPAN3	10099	direct																			OXSR1	direct		SOD2	indirect
TOB1	10140	direct																			PABPC1	direct		SP1	indirect
AKAP9	10142	direct																			PAIP1	direct		SPHK1	indirect
CALCOCO2	10241	direct																			PARP12	direct		SPP1	indirect
DSCR3	10311	direct																			PCK2	direct		SQSTM1	indirect
TNIP1	10318	direct																			PCM1	direct		SRC	indirect
TUBB4B	10383	direct																			PCNT	direct		STAT1	indirect
ECI2	10455	direct																			PCP4L1	direct		STAT2	indirect
ENOX2	10495	direct																			PDCD5	direct		STAT3	indirect
DCTN2	10540	direct																			PDCD6IP	direct		STAU1	indirect
ANP32B	10541	direct																			PDIA2	direct		STK32B	indirect
SIVA1	10572	direct																			PDIA3	direct		STMN1	indirect
IGF2BP2	10644	direct																			PDIA6	direct		STYK1	indirect
SDCCAG8	10806	direct																			PEBP1	direct		SYK	indirect
ALDH1L1	10840	direct																			PGK1	direct		SYNGR1	indirect
OS9	10956	direct																			PHGDH	direct		SYNJ1	indirect
GCN1L1	10985	direct																			PHLDB3	direct		SYNJ2	indirect
WWP1	11059	direct																			PIAS1	direct		TABP	indirect
EMILIN1	11117	direct																			PIAS2	direct		TAP1	indirect
XPOT	11260	direct																			PKD1	direct		TAZ	indirect
SEC31A	22872	direct																			PKM	direct		TBX20	indirect
ZNF365	22891	direct																			PLEC	direct		TESK2	indirect
RAB18	22931	direct																			PLG	direct		TF	indirect
SCMH1	22955	direct																			PLIN3	direct		TFPI	indirect
AKR7A3	22977	direct																			PLS3	direct		THBD	indirect
HMGXB3	22993	direct																			PMAIP1	direct		TIMD4	indirect
CNOT1	23019	direct																			PRDX1	direct		TIRAP	indirect
XPO7	23039	direct																			PRDX3	direct		TJP1	indirect
MYCBP2	23077	direct																			PRDX6	direct		TJP2	indirect
TAB2	23118	direct																			PRKCE	direct		TKFC	indirect
DCUN1D4	23142	direct																			PRKDC	direct		TLR2	indirect
WWC1	23286	direct																			PRKRA	direct		TLR3	indirect
TRIM2	23321	direct																			PRMT5	direct		TLR4	indirect
SYNE1	23345	direct																			PSAP	direct		TLR6	indirect
UBR4	23352	direct																			PSMA8	direct		TNF	indirect
KIAA0368	23392	direct																			PSMC1	direct		TNFRSF9	indirect
GTPBP4	23560	direct																			PSMD1	direct		TNFSF10	indirect
EID1	23741	direct																			PTB	direct		TNFSF13B	indirect
SLC24A2	25769	direct																			PTBP1	direct		TP53	indirect
RAI14	26064	direct																			RAB18	direct		TRAPPC10	indirect
GGA1	26088	direct																			RAC1	direct		TREM1	indirect
COPG2	26958	direct																			RAI14	direct		TRIM56	indirect
AKAP8L	26993	direct																			RANTES	direct		TTK	indirect
SND1	27044	direct																			RBMX	direct		TUBE1	indirect
LSM1	27257	direct																			RBP4	direct		TXNRD1	indirect
RBMX	27316	direct																			RCN2	direct		TYK2	indirect
TBK1	29110	direct																			RELA	direct		TYRO3	indirect
SEC61A1	29927	direct																			RELN	direct		TYROBP	indirect
NRBP1	29959	direct																			RILPL2	direct		UBE2E3	indirect
ADGRE2	30817	direct																			RNASET2	direct		UGP2	indirect
DNTTIP2	30836	direct																			RNF125	direct		UHMK1	indirect
HSD17B12	51144	direct																			RNF213	direct		USP13	indirect
HOOK1	51361	direct																			RPL10	direct		USP14	indirect
HACD3	51495	direct																			RPL11	direct		VCAM1	indirect
CUTA	51596	direct																			RPL12	direct		VEGFA	indirect
LSR	51599	direct																			RPL13	direct		VEGFC	indirect
LUC7L3	51747	direct																			RPL14	direct		VIM	indirect
APBB1IP	54518	direct																			RPL17	direct		VTN	indirect
NECAB2	54550	direct																			RPL18	direct		WASF2	indirect
DIRAS2	54769	direct																			RPL18A	direct		XAF1	indirect
AFTPH	54812	direct																			RPL19	direct		XBP1	indirect
DNAAF5	54919	direct																			RPL21	direct		XIAP	indirect
HAUS4	54930	direct																			RPL23A	direct		ZBTB41	indirect
RNF125	54941	direct																			RPL24	direct		ZNF91	indirect
UACA	55075	direct																			RPL26	direct
AGGF1	55109	direct																			RPL27A	direct
HEATR1	55127	direct																			RPL31	direct
CENPQ	55166	direct																			RPL36	direct
ATAD3A	55210	direct																			RPL5	direct
SYBU	55638	direct																			RPL6	direct
ECHDC1	55862	direct																			RPL7	direct
TMEM167B	56900	direct																			RPS13	direct
NCLN	56926	direct																			RPS14	direct
ADCK3	56997	direct																			RPS15	direct
ANKRD50	57182	direct																			RPS15A	direct
KIF17	57576	direct																			RPS16	direct
KIAA1524	57650	direct																			RPS18	direct
CCAR2	57805	direct																			RPS2	direct
ZNF410	57862	direct																			RPS23	direct
MMS19	64210	direct																			RPS24	direct
AZI2	64343	direct																			RPS25	direct
NUCKS1	64710	direct																			RPS27	direct
FUNDC2	65991	direct																			RPS27A	direct
NOC4L	79050	direct																			RPS3A	direct
MLPH	79083	direct																			RPS4X	direct
BCL2L14	79370	direct																			RPS5	direct
FAM184A	79632	direct																			RPS6	direct
IPO4	79711	direct																			RPS7	direct
SUGCT	79783	direct																			RPS8	direct
MYH14	79784	direct																			RPSA	direct
TTC21B	79809	direct																			RRP12	direct
FAM192A	80011	direct																			RSAD2	direct
CEP63	80254	direct																			RUFY3	direct
COL18A1	80781	direct																			S100A6	direct
SLIRP	81892	direct																			S100A9	direct
EIF2A	83939	direct																			SAT1	direct
ZNF394	84124	direct																			SCLT1	direct
TUBB6	84617	direct																			SCMH1	direct
CGNL1	84952	direct																			SDCCAG8	direct
MPND	84954	direct																			SEC31A	direct
OXNAD1	92106	direct																			SEC61A1	direct
TIMM50	92609	direct																			SEPP1	direct
SFXN1	94081	direct																			SERPIND1	direct
HIST4H4	121504	direct																			SERPINE1	direct
EARS2	124454	direct																			SERPINH1	direct
HIST2H3C	126961	direct																			SFXN1	direct
MTERF4	130916	direct																			SIAH2	direct
SCLT1	132320	direct																			SIK3	direct
VPS37A	137492	direct																			SIPA1	direct
AMER1	139285	direct																			SIVA1	direct
FUNDC1	139341	direct																			SKA2	direct
PSMA8	143471	direct																			SLC16A1	direct
ZNF688	146542	direct																			SLC1A5	direct
COMMD1	150684	direct																			SLC24A2	direct
SRFBP1	153443	direct																			SLC25A1	direct
UBXN2A	165324	direct																			SLC25A11	direct
RILPL2	196383	direct																			SLC25A13	direct
ARID2	196528	direct																			SLC25A22	direct
TUBB	203068	direct																			SLC25A3	direct
BRAT1	221927	direct																			SLC25A5	direct
HIST1H2BA	255626	direct																			SLC25A6	direct
BOD1L1	259282	direct																			SLIRP	direct
CCDC66	285331	direct																			SMU1	direct
YIPF6	286451	direct																			SND1	direct
ZBTB8OS	339487	direct																			SPG7	direct
TMEM173	340061	direct																			SPHK1	direct
SKA2	348235	direct																			SPTAN1	direct
FAM132A	388581	direct																			SPTBN2	direct
H3F3C	440093	direct																			SPTLC1	direct
LOC642846	642846	direct																			SRFBP1	direct
PHLDB3	653583	direct																			SRSF11	direct
PCP4L1	654790	direct																			SSB	direct
MIR548G	100313938	direct																			STAT1	direct
MTRNR2L1	100462977	direct																			STAT2	direct
ACTA2	59	direct, differentially expressed																			STAT3	direct
ACTB	60	direct, differentially expressed																			SUGCT	direct
AHSG	197	direct, differentially expressed																			SURF4	direct
SLC25A5	292	direct, differentially expressed																			SYBU	direct
SLC25A6	293	direct, differentially expressed																			SYNE1	direct
ANXA2	302	direct, differentially expressed																			SYNE2	direct
APCS	325	direct, differentially expressed																			SYNGR1	direct
ARF1	375	direct, differentially expressed																			TAB2	direct
ARF4	378	direct, differentially expressed																			TAF15	direct
ATP1A1	476	direct, differentially expressed																			TARBP2	direct
C1QA	712	direct, differentially expressed																			TAX1BP1	direct
C1S	716	direct, differentially expressed																			TAZ	direct
C4A	720	direct, differentially expressed																			TBK1	direct
C4B	721	direct, differentially expressed																			TCF7L2	direct
C4BPA	722	direct, differentially expressed																			TECR	direct
CANX	821	direct, differentially expressed																			TELO2	direct
CD38	952	direct, differentially expressed																			TESK1	direct
CD59	966	direct, differentially expressed																			TF	direct
CDK1	983	direct, differentially expressed																			THNSL1	direct
CDK9	1025	direct, differentially expressed																			TIA1	direct
CES1	1066	direct, differentially expressed																			TIAL1	direct
CFL1	1072	direct, differentially expressed																			TIMM50	direct
CHEK1	1111	direct, differentially expressed																			TJP1	direct
CHML	1122	direct, differentially expressed																			TLR2	direct
CLU	1191	direct, differentially expressed																			TLR4	direct
CSE1L	1434	direct, differentially expressed																			TLR6	direct
CSNK2A1	1457	direct, differentially expressed																			TMEM167B	direct
CTNNB1	1499	direct, differentially expressed																			TMEM173	direct
DAXX	1616	direct, differentially expressed																			TMF1	direct
DHX9	1660	direct, differentially expressed																			TMOD1	direct
DHX15	1665	direct, differentially expressed																			TNF	direct
EEF1A1	1915	direct, differentially expressed																			TNFRSF10B	direct
EEF1B2	1933	direct, differentially expressed																			TNFRSF9	direct
EIF4A1	1973	direct, differentially expressed																			TNFSF10	direct
FASN	2194	direct, differentially expressed																			TNIP1	direct
FGA	2243	direct, differentially expressed																			TOB1	direct
FLNA	2316	direct, differentially expressed																			TOM1L1	direct
FMR1	2332	direct, differentially expressed																			TP53BP2	direct
FN1	2335	direct, differentially expressed																			TP73	direct
MTOR	2475	direct, differentially expressed																			TRAF4	direct
GAB1	2549	direct, differentially expressed																			TRAFD1	direct
GAPDH	2597	direct, differentially expressed																			TRIM2	direct
GPI	2821	direct, differentially expressed																			TRIM25	direct
HBA1	3039	direct, differentially expressed																			TRIM62	direct
HBB	3043	direct, differentially expressed																			TRIP11	direct
HNRNPA2B1	3181	direct, differentially expressed																			TSPAN3	direct
HNRNPC	3183	direct, differentially expressed																			TTC1	direct
HNRNPF	3185	direct, differentially expressed																			TTC21B	direct
HNRNPK	3190	direct, differentially expressed																			TUBA1A	direct
HP	3240	direct, differentially expressed																			TUBA1C	direct
HSPA1A	3303	direct, differentially expressed																			TUBA4A	direct
HSPA8	3312	direct, differentially expressed																			TUBB	direct
HSPB1	3315	direct, differentially expressed																			TUBB2A	direct
HSP90AB1	3326	direct, differentially expressed																			TUBB4B	direct
IFI16	3428	direct, differentially expressed																			TUBB6	direct
ILF2	3608	direct, differentially expressed																			UACA	direct
IMPDH2	3615	direct, differentially expressed																			UBE2I	direct
KNG1	3827	direct, differentially expressed																			UBE3A	direct
KRT8	3856	direct, differentially expressed																			UBR4	direct
KTN1	3895	direct, differentially expressed																			UBXN2A	direct
LCK	3932	direct, differentially expressed																			USP10	direct
LMNA	4000	direct, differentially expressed																			USP9X	direct
M6PR	4074	direct, differentially expressed																			VDAC3	direct
MAD2L1	4085	direct, differentially expressed																			VIM	direct
MT2A	4502	direct, differentially expressed																			VPS11	direct
MTHFD1	4522	direct, differentially expressed																			VPS37A	direct
NAP1L1	4673	direct, differentially expressed																			WWC1	direct
NCL	4691	direct, differentially expressed																			WWP1	direct
NRGN	4900	direct, differentially expressed																			XPA	direct
YBX1	4904	direct, differentially expressed																			XPO1	direct
PEBP1	5037	direct, differentially expressed																			XPO7	direct
PRDX1	5052	direct, differentially expressed																			XPOT	direct
PGK1	5230	direct, differentially expressed																			XRN1	direct
PKD1	5310	direct, differentially expressed																			YBX1	direct
PLG	5340	direct, differentially expressed																			YIPF6	direct
PLS3	5358	direct, differentially expressed																			ZAP70	direct
PRKCE	5581	direct, differentially expressed																			ZBTB8OS	direct
PSAP	5660	direct, differentially expressed																			ZNF365	direct
PSMC1	5700	direct, differentially expressed																			ZNF394	direct
PSMD1	5707	direct, differentially expressed																			ZNF410	direct
PTBP1	5725	direct, differentially expressed																			ZNF688	direct
RBP4	5950	direct, differentially expressed																			ZW10	direct
RCN2	5955	direct, differentially expressed
RPL10	6134	direct, differentially expressed
RPL11	6135	direct, differentially expressed
RPL13	6137	direct, differentially expressed
RPL17	6139	direct, differentially expressed
RPL18	6141	direct, differentially expressed
RPL18A	6142	direct, differentially expressed
RPL23A	6147	direct, differentially expressed
RPL26	6154	direct, differentially expressed
RPL27A	6157	direct, differentially expressed
RPS3A	6189	direct, differentially expressed
RPS5	6193	direct, differentially expressed
RPS6	6194	direct, differentially expressed
RPS13	6207	direct, differentially expressed
RPS14	6208	direct, differentially expressed
RPS15	6209	direct, differentially expressed
RPS15A	6210	direct, differentially expressed
RPS16	6217	direct, differentially expressed
RPS25	6230	direct, differentially expressed
RPS27	6232	direct, differentially expressed
RPS27A	6233	direct, differentially expressed
S100A9	6280	direct, differentially expressed
SAT1	6303	direct, differentially expressed
SPG7	6687	direct, differentially expressed
SPTAN1	6709	direct, differentially expressed
TCF7L2	6934	direct, differentially expressed
DYNLT1	6993	direct, differentially expressed
TUBA4A	7277	direct, differentially expressed
TUBB2A	7280	direct, differentially expressed
ZAP70	7535	direct, differentially expressed
TRIM25	7706	direct, differentially expressed
TUBA1A	7846	direct, differentially expressed
AKAP1	8165	direct, differentially expressed
AXIN1	8312	direct, differentially expressed
HIST2H2BE	8349	direct, differentially expressed
HIST1H4H	8365	direct, differentially expressed
AP3B1	8546	direct, differentially expressed
HRK	8739	direct, differentially expressed
DPM1	8813	direct, differentially expressed
KAT2B	8850	direct, differentially expressed
ATP6V0E1	8992	direct, differentially expressed
PIAS2	9063	direct, differentially expressed
CLDN1	9076	direct, differentially expressed
AIFM1	9131	direct, differentially expressed
PDCD5	9141	direct, differentially expressed
ARHGEF2	9181	direct, differentially expressed
LRRFIP1	9208	direct, differentially expressed
IKBKE	9641	direct, differentially expressed
KNTC1	9735	direct, differentially expressed
MATR3	9782	direct, differentially expressed
PDCD6IP	10015	direct, differentially expressed
PDIA6	10130	direct, differentially expressed
SLC25A13	10165	direct, differentially expressed
PRMT5	10419	direct, differentially expressed
HAX1	10456	direct, differentially expressed
ARL6IP5	10550	direct, differentially expressed
SPTLC1	10558	direct, differentially expressed
PAIP1	10605	direct, differentially expressed
NUP50	10762	direct, differentially expressed
TRAFD1	10906	direct, differentially expressed
MAGED2	10916	direct, differentially expressed
PRDX3	10935	direct, differentially expressed
KDELR1	10945	direct, differentially expressed
MAPRE2	10982	direct, differentially expressed
CORO1A	11151	direct, differentially expressed
ERLIN2	11160	direct, differentially expressed
CEP250	11190	direct, differentially expressed
COBLL1	22837	direct, differentially expressed
RUFY3	22902	direct, differentially expressed
KIF1B	23095	direct, differentially expressed
MPRIP	23164	direct, differentially expressed
FAF2	23197	direct, differentially expressed
RRP12	23223	direct, differentially expressed
SYNE2	23224	direct, differentially expressed
ANKRD12	23253	direct, differentially expressed
RPL36	25873	direct, differentially expressed
PHGDH	26227	direct, differentially expressed
PABPC1	26986	direct, differentially expressed
CD209	30835	direct, differentially expressed
DERL2	51009	direct, differentially expressed
XRN1	54464	direct, differentially expressed
ANKHD1	54882	direct, differentially expressed
NCAPG2	54892	direct, differentially expressed
TRIM62	55223	direct, differentially expressed
SMU1	55234	direct, differentially expressed
NLRP2	55655	direct, differentially expressed
EXOC1	55763	direct, differentially expressed
VPS11	55823	direct, differentially expressed
EAF2	55840	direct, differentially expressed
DDX24	57062	direct, differentially expressed
MAVS	57506	direct, differentially expressed
RNF213	57674	direct, differentially expressed
PARP12	64761	direct, differentially expressed
MRPS15	64960	direct, differentially expressed
SLC25A22	79751	direct, differentially expressed
THNSL1	79896	direct, differentially expressed
DENND1C	79958	direct, differentially expressed
TUBA1C	84790	direct, differentially expressed
EAF1	85403	direct, differentially expressed
CCDC88C	440193	direct, differentially expressed
APOA1	335	direct, indirect
APOE	348	direct, indirect
DST	667	direct, indirect
DDX3X	1654	direct, indirect
DNM2	1785	direct, indirect
F2	2147	direct, indirect
HMGB1	3146	direct, indirect
NOS2	4843	direct, indirect
PRKDC	5591	direct, indirect
STAT3	6774	direct, indirect
TAZ	6901	direct, indirect
TF	7018	direct, indirect
TJP1	7082	direct, indirect
TLR2	7097	direct, indirect
TLR4	7099	direct, indirect
PIAS1	8554	direct, indirect
SPHK1	8877	direct, indirect
AP1M1	8907	direct, indirect
SYNGR1	9145	direct, indirect
PLIN3	10226	direct, indirect
SIK3	23387	direct, indirect
PDIA2	64714	direct, indirect
AKT1	207	direct, indirect, differentially expressed
CD14	929	direct, indirect, differentially expressed
CTSB	1508	direct, indirect, differentially expressed
ENO1	2023	direct, indirect, differentially expressed
FH	2271	direct, indirect, differentially expressed
PDIA3	2923	direct, indirect, differentially expressed
HLA-B	3106	direct, indirect, differentially expressed
HMOX1	3162	direct, indirect, differentially expressed
HPX	3263	direct, indirect, differentially expressed
HSPA5	3309	direct, indirect, differentially expressed
HSP90AA1	3320	direct, indirect, differentially expressed
HSPD1	3329	direct, indirect, differentially expressed
IFNG	3458	direct, indirect, differentially expressed
IL6	3569	direct, indirect, differentially expressed
CXCL8	3576	direct, indirect, differentially expressed
TNFRSF9	3604	direct, indirect, differentially expressed
CXCL10	3627	direct, indirect, differentially expressed
IRF3	3661	direct, indirect, differentially expressed
RPSA	3921	direct, indirect, differentially expressed
CAPRIN1	4076	direct, indirect, differentially expressed
MX1	4599	direct, indirect, differentially expressed
NFKB1	4790	direct, indirect, differentially expressed
NFKBIA	4792	direct, indirect, differentially expressed
SERPINE1	5054	direct, indirect, differentially expressed
PMAIP1	5366	direct, indirect, differentially expressed
MAPK1	5594	direct, indirect, differentially expressed
RAC1	5879	direct, indirect, differentially expressed
RELA	5970	direct, indirect, differentially expressed
STAT1	6772	direct, indirect, differentially expressed
STAT2	6773	direct, indirect, differentially expressed
TNF	7124	direct, indirect, differentially expressed
VIM	7431	direct, indirect, differentially expressed
PRKRA	8575	direct, indirect, differentially expressed
TNFSF10	8743	direct, indirect, differentially expressed
G3BP2	9908	direct, indirect, differentially expressed
G3BP1	10146	direct, indirect, differentially expressed
TLR6	10333	direct, indirect, differentially expressed
ERC1	23085	direct, indirect, differentially expressed
DDX58	23586	direct, indirect, differentially expressed
IFIH1	64135	direct, indirect, differentially expressed
RSAD2	91543	direct, indirect, differentially expressed
ACACA	31	indirect
AP2A1	160	indirect
AMPH	273	indirect
ANGPT1	284	indirect
ANGPT2	285	indirect
XIAP	331	indirect
FASL	356	indirect
ARRB1	408	indirect
ATP6V1B1	525	indirect
ATP6V1B2	526	indirect
ATP6V0C	527	indirect
ATP6V0B	533	indirect
ATP6V1G2	534	indirect
ATP6V0A1	535	indirect
AVPR1B	553	indirect
BCL2	596	indirect
CASP9	842	indirect
CBL	867	indirect
CBLB	868	indirect
CD4	920	indirect
CD8	925	indirect
SCARB1	949	indirect
CDC27	996	indirect
CDH1	999	indirect
CDH5	1003	indirect
CHI3L1	1116	indirect
CHRNA2	1135	indirect
CISH	1154	indirect
AP2M1	1173	indirect
CLTB	1212	indirect
CLTC	1213	indirect
PLK3	1263	indirect
MAPK14	1432	indirect
CSF2RB	1439	indirect
CSNK1D	1453	indirect
DDIT3	1649	indirect
NQO1	1728	indirect
DNM1	1759	indirect
DRD4	1815	indirect
EDN1	1906	indirect
ENG	2022	indirect
EPAS1	2034	indirect
ERN1	2081	indirect
F2R	2149	indirect
F3	2152	indirect
FCGR3A	2214	indirect
FES	2242	indirect
FYN	2534	indirect
IFI6	2537	indirect
GCLC	2729	indirect
GCLM	2730	indirect
NRG1	3084	indirect
HIF1A	3091	indirect
HIP1	3092	indirect
HLA-A	3105	indirect
HLA-DRB1	3123	indirect
HMGCR	3156	indirect
HMGCS1	3157	indirect
HTR2A	3356	indirect
ICAM1	3383	indirect
ICAM1	3383	indirect
IFNA2	3440	indirect
IFN-β	3456	indirect
KDR	3791	indirect
LCP2	3937	indirect
SMAD7	4092	indirect
MAK	4117	indirect
MMP2	4313	indirect
MMP2	4313	indirect
MMP3	4314	indirect
MUC2	4583	indirect
MVD	4597	indirect
NACA	4666	indirect
NFE2L2	4780	indirect
CNOT2	4848	indirect
NPR2	4882	indirect
CD73	4907	indirect
OPHN1	4983	indirect
OSM	5008	indirect
PECAM1	5175	indirect
PHF2	5253	indirect
PLAT	5327	indirect
PNLIPRP1	5407	indirect
PPP2R2A	5520	indirect
PKIB	5570	indirect
PRKCD	5580	indirect
MAPK3	5595	indirect
JNK	5599	indirect
MAPK11	5600	indirect
PROC	5624	indirect
PTGER2	5732	indirect
PTGER4	5734	indirect
RAB3A	5864	indirect
RAB5A	5868	indirect
REL	5966	indirect
RELB	5971	indirect
ROCK1	6093	indirect
SDC2	6383	indirect
SP1	6667	indirect
SRC	6714	indirect
STAU1	6780	indirect
SYK	6850	indirect
TABP	6892	indirect
TFPI	7035	indirect
THBD	7056	indirect
TRAPPC10	7109	indirect
TYK2	7297	indirect
TYRO3	7301	indirect
TYROBP	7305	indirect
UGP2	7360	indirect
VCAM1	7412	indirect
VEGFC	7424	indirect
VTN	7448	indirect
PLA2G7	7941	indirect
CAMK1	8536	indirect
RIPK1	8737	indirect
SYNJ1	8867	indirect
SYNJ2	8871	indirect
RAB29	8934	indirect
USP13	8975	indirect
SOCS3	9021	indirect
HIP1R	9026	indirect
USP14	9097	indirect
TJP2	9414	indirect
PICK1	9463	indirect
RAB3D	9545	indirect
ARPC3	10094	indirect
ARPC1B	10095	indirect
PRG4	10216	indirect
GNB2L1	10399	indirect
TESK2	10420	indirect
UBE2E3	10477	indirect
CIB2	10518	indirect
NEK6	10783	indirect
EPN2	22905	indirect
ATF6	22926	indirect
GANAB	23193	indirect
EXOC7	23265	indirect
MAPK8IP2	23542	indirect
CBLC	23624	indirect
SHPK	23729	indirect
TKFC	26007	indirect
HAVCR1	26762	indirect
BBC3	27113	indirect
ANGPTL3	27329	indirect
PACSIN3	29763	indirect
EPN1	29924	indirect
PKN3	29941	indirect
TUBE1	51175	indirect
PHF20	51230	indirect
DLL4	54567	indirect
ETNK2	55224	indirect
ELP2	55250	indirect
STK32B	55351	indirect
STYK1	55359	indirect
GALNT10	55568	indirect
TBX20	57057	indirect
PRR12	57479	indirect
ALPK3	57538	indirect
FASTKD5	60493	indirect
NAA35	60560	indirect
GORASP1	64689	indirect
DIAPH3	81624	indirect
TRIM56	81844	indirect
TIMD4	91937	indirect
NLRP3	114548	indirect
TIRAP	114609	indirect
ATP6V1G3	127124	indirect
DCST2	127579	indirect
UHMK1	127933	indirect
SLC5A12	159963	indirect
IFNLR1	163702	indirect
GSX1	219409	indirect
ATP6V1C2	245973	indirect
ZBTB41	360023	indirect
HRNR	388697	indirect
MIRLET7C	406885	indirect
MIR146A	406938	indirect
MIR30E	407034	indirect
RNASEK	440400	indirect
PHOSPHO2	493911	indirect
OCLN	100506658	indirect
ADM	133	indirect, differentially expressed
PARP1	142	indirect, differentially expressed
AP1B1	162	indirect, differentially expressed
AP2B1	163	indirect, differentially expressed
FAS	355	indirect, differentially expressed
ATP6AP1	537	indirect, differentially expressed
AXL	558	indirect, differentially expressed
BAX	581	indirect, differentially expressed
BCL2L1	598	indirect, differentially expressed
BST2	684	indirect, differentially expressed
C5	727	indirect, differentially expressed
CASP1	834	indirect, differentially expressed
CASP3	836	indirect, differentially expressed
CASP8	841	indirect, differentially expressed
CD9	928	indirect, differentially expressed
CDC42	998	indirect, differentially expressed
CDKN3	1033	indirect, differentially expressed
CEBPB	1051	indirect, differentially expressed
CCR5	1234	indirect, differentially expressed
CCR7	1236	indirect, differentially expressed
CRP	1401	indirect, differentially expressed
CTSD	1509	indirect, differentially expressed
CTSS	1520	indirect, differentially expressed
CFD	1675	indirect, differentially expressed
DIAPH1	1729	indirect, differentially expressed
EGR1	1958	indirect, differentially expressed
EIF2S1	1965	indirect, differentially expressed
EPS15	2060	indirect, differentially expressed
FDFT1	2222	indirect, differentially expressed
FOS	2353	indirect, differentially expressed
IFI6	2537	indirect, differentially expressed
G6PD	2539	indirect, differentially expressed
GBP1	2633	indirect, differentially expressed
GCH1	2643	indirect, differentially expressed
HK2	3099	indirect, differentially expressed
HNRNPH1	3187	indirect, differentially expressed
HSPA4	3308	indirect, differentially expressed
IFIT2	3433	indirect, differentially expressed
IFIT1	3434	indirect, differentially expressed
IFIT3	3437	indirect, differentially expressed
IFNA1	3439	indirect, differentially expressed
IFNB1	3456	indirect, differentially expressed
IL1B	3553	indirect, differentially expressed
IL2	3558	indirect, differentially expressed
IL2RA	3559	indirect, differentially expressed
IL4	3565	indirect, differentially expressed
IL7	3574	indirect, differentially expressed
IL10	3586	indirect, differentially expressed
IL10RA	3587	indirect, differentially expressed
IL12A	3592	indirect, differentially expressed
IL12B	3593	indirect, differentially expressed
IL18	3606	indirect, differentially expressed
IDO1	3620	indirect, differentially expressed
IRF1	3659	indirect, differentially expressed
IRF7	3665	indirect, differentially expressed
ITGB3	3690	indirect, differentially expressed
JAK2	3717	indirect, differentially expressed
JAK3	3718	indirect, differentially expressed
JUN	3725	indirect, differentially expressed
STMN1	3925	indirect, differentially expressed
LDLR	3949	indirect, differentially expressed
LGALS9	3965	indirect, differentially expressed
RAB8A	4218	indirect, differentially expressed
MIF	4282	indirect, differentially expressed
CXCL9	4283	indirect, differentially expressed
MMP9	4318	indirect, differentially expressed
NFKB2	4791	indirect, differentially expressed
NOTCH4	4855	indirect, differentially expressed
OAS1	4938	indirect, differentially expressed
OAS3	4940	indirect, differentially expressed
PFKFB3	5209	indirect, differentially expressed
PML	5371	indirect, differentially expressed
PSMB9	5698	indirect, differentially expressed
PTGS2	5743	indirect, differentially expressed
RNASEL	6041	indirect, differentially expressed
CCL2	6347	indirect, differentially expressed
CCL3	6348	indirect, differentially expressed
CCL4	6351	indirect, differentially expressed
CCL5	6352	indirect, differentially expressed
CXCL11	6373	indirect, differentially expressed
SELE	6401	indirect, differentially expressed
SLC2A1	6513	indirect, differentially expressed
SOD2	6648	indirect, differentially expressed
SPP1	6696	indirect, differentially expressed
TAP1	6890	indirect, differentially expressed
TLR3	7098	indirect, differentially expressed
TP53	7157	indirect, differentially expressed
TTK	7272	indirect, differentially expressed
TXNRD1	7296	indirect, differentially expressed
VEGFA	7422	indirect, differentially expressed
XBP1	7494	indirect, differentially expressed
ZNF91	7644	indirect, differentially expressed
PIP5K1A	8394	indirect, differentially expressed
PIP4K2B	8396	indirect, differentially expressed
EEA1	8411	indirect, differentially expressed
IFITM1	8519	indirect, differentially expressed
OASL	8638	indirect, differentially expressed
SOCS1	8651	indirect, differentially expressed
EIF3A	8661	indirect, differentially expressed
RIPK2	8767	indirect, differentially expressed
NAPA	8775	indirect, differentially expressed
IL18RAP	8807	indirect, differentially expressed
SQSTM1	8878	indirect, differentially expressed
ATP6V0D1	9114	indirect, differentially expressed
ATG12	9140	indirect, differentially expressed
RAB11B	9230	indirect, differentially expressed
COPB2	9276	indirect, differentially expressed
EIF2AK3	9451	indirect, differentially expressed
ATG5	9474	indirect, differentially expressed
ISG15	9636	indirect, differentially expressed
EIF5B	9669	indirect, differentially expressed
ACTR2	10097	indirect, differentially expressed
ATP6AP2	10159	indirect, differentially expressed
WASF2	10163	indirect, differentially expressed
IRF9	10379	indirect, differentially expressed
IFITM3	10410	indirect, differentially expressed
IFITM2	10581	indirect, differentially expressed
TNFSF13B	10673	indirect, differentially expressed
HPSE	10855	indirect, differentially expressed
LILRB1	10859	indirect, differentially expressed
SEC61B	10952	indirect, differentially expressed
MAP4K5	11183	indirect, differentially expressed
CLEC5A	23601	indirect, differentially expressed
PPP1R15A	23645	indirect, differentially expressed
IFIT5	24138	indirect, differentially expressed
EIF2AK1	27102	indirect, differentially expressed
DLL1	28514	indirect, differentially expressed
ITSN2	50618	indirect, differentially expressed
ATP6V1H	51606	indirect, differentially expressed
RAB8B	51762	indirect, differentially expressed
TREM1	54210	indirect, differentially expressed
ANLN	54443	indirect, differentially expressed
XAF1	54739	indirect, differentially expressed
MAP1LC3A	84557	indirect, differentially expressed
LRIG3	121227	indirect, differentially expressed
