# Supplementary material for: DenHunt - A Comprehensive Database of the Intricate Network of Dengue-Human Interactions
Source: PLoS Negl Trop Dis. 2016 Sep 12;10(9):e0004965. doi: 10.1371/journal.pntd.0004965 (PMC5019383; doi:10.1371/journal.pntd.0004965)
Supplement: S2 Dataset — This excel file contains the manually curated dengue virus-human interactions that belong to the 1) direct physical interactions, 2) indirect interactions and 3) differentially expressed genes. (XLSX) [file pntd.0004965.s005.xlsx]

## Sheet: Readme
		S3 Dataset:	The consolidated list of direct, indirect and differentially expressed dengue virus interacting genes. This excel file contains the manually curated dengue virus-human interactions that belong to the 1) direct physical interactions, 2) indirect interactions and 3) differentially expressed genes.
		Worksheets
		Sheet 1 (Direct-Interactions):	Direct interactions detected by Y2H assay, CoIP, Colocalization
		Sheet 2 (Indirect-Interactions):	Genes involved in Dengue infection determined by small scale studies or siRNA studies.
		Sheet 3 (Differentially-Expressed-Genes):	Differentially expressed genes identified in DENV infected different cell lines and patients.
		Column headers
		Dengue viral component	Dengue viral protein or RNA
		Human Gene symbol	Gene symbol of Human protein
		Human gene Entrez Id	Entrez gene id of the Human protein
		Pubmed Id	Pubmed Id from which the interaction was extracted
		Patient type or Serotype	What type of patient sample was used in the study
		System	What type of sample used. Ex: cell line, Blood etc
		Experiment	What kind of experiments were used to detect the interaction
		Comparision	This column is basically for the expresion studies. It tells which condition was compared with which condition
		Variation	What type of variation Up or Down
		Title	Title of the paper
		GEO Datasets	GEO series id if available

## Sheet: Direct-Interactions
Dengue viral component	Human Gene symbol	Human gene Entrez Id	Pubmed Id	Serotype	System	Experiment	Title
3'-UTR	CALR	811	12584332	DENV4	U937	Crosslinking followed by immunoprecipitation and mobility shift assay	Cellular proteins from human monocytes bind to dengue 4 virus minus-strand 3' untranslated region RNA.
3'-UTR	PDIA2	64714	12584332	DENV4	U937	Crosslinking followed by immunoprecipitation and mobility shift assay	Cellular proteins from human monocytes bind to dengue 4 virus minus-strand 3' untranslated region RNA.
3'-UTR	SSB	6741	12584332	DENV4	U937	Crosslinking followed by immunoprecipitation and mobility shift assay	Cellular proteins from human monocytes bind to dengue 4 virus minus-strand 3' untranslated region RNA.
3'-UTR	TIA1	7072	17502609	DENV2	BHK-21	Co-immunoprecipitation, Western blot, Co-localization by Confocal Microscopy	Interaction of TIA-1/TIAR with West Nile and dengue virus products in infected cells interferes with stress granule formation and processing body assembly
3'-UTR	TIAL1	7073	17502609	DENV2	BHK-21	Co-immunoprecipitation, Western blot, Co-localization by Confocal Microscopy	Interaction of TIA-1/TIAR with West Nile and dengue virus products in infected cells interferes with stress granule formation and processing body assembly
3'-UTR	HNRNPA1	3178	17726010	DENV2	BHK-21, Immortalized mouse embryo fibroblasts	Affinity Chromatography followed by Mass Spectrometry, Viral RNA Immunoprecipitation	Y box-binding protein-1 binds to the dengue virus 3'-untranslated region and mediates antiviral effects.
3'-UTR	HNRNPA2B1	3181	17726010	DENV2	BHK-21, Immortalized mouse embryo fibroblasts	Affinity Chromatography followed by Mass Spectrometry and Viral RNA Immunoprecipitation	Y box-binding protein-1 binds to the dengue virus 3'-untranslated region and mediates antiviral effects.
3'-UTR	YBX1	4904	17726010	DENV2	BHK-21, Immortalized mouse embryo fibroblasts	Affinity Chromatography followed by Mass Spectrometry and Viral RNA Immunoprecipitation	Y box-binding protein-1 binds to the dengue virus 3'-untranslated region and mediates antiviral effects.
3'-UTR	PABPC1	26986	19218215	DENV2	Cell free assays	RNA binding followed by EMSA	Poly(A)-binding protein binds to the non-polyadenylated 3′ untranslated region of dengue virus and modulates translation efficiency
3'-UTR	PTBP1	5725	19380576	DENV2	BHK-21, Vero	RNA immunoprecipitation followed by mass spectrometry, Confocal immunofluorescence analysis, siRNA,	The polypyrimidine tract-binding protein is required for efficient dengue virus propagation and associates with the viral replication machinery.
3'-UTR	PTBP1	5725	21148275	DENV2	A549	RNA immunoprecipitation followed by mass spectrometry, Confocal immunofluorescence analysis	Functional interaction between cellular p100 and the dengue virus 3' UTR.
3'-UTR	RBMX	27316	21148275	DENV2	A549	RNA immunoprecipitation followed by mass spectrometry, Confocal immunofluorescence analysis	Functional interaction between cellular p100 and the dengue virus 3' UTR.
3'-UTR	SND1	27044	21148275	DENV2	A549	RNA immunoprecipitation followed by mass spectrometry, Confocal immunofluorescence analysis	Functional interaction between cellular p100 and the dengue virus 3' UTR.
3'-UTR	DHX9	1660	21386893	DENV2, DENV4	K562, HeLa	RNA affinity chromatography, Electrophoretic mobility shift assay	NF90 binds the dengue virus RNA 3' terminus and is a positive regulator of dengue virus replication.
3'-UTR	ILF2	3608	21386893	DENV2, DENV4	K562, HeLa	RNA affinity chromatography, Electrophoretic mobility shift assay	NF90 binds the dengue virus RNA 3' terminus and is a positive regulator of dengue virus replication.
3'-UTR	ILF3	3609	21386893	DENV2, DENV4	K562, HeLa	RNA affinity chromatography, Electrophoretic mobility shift assay	NF90 binds the dengue virus RNA 3' terminus and is a positive regulator of dengue virus replication.
3'-UTR	CAPRIN1	4076	21957497	DENV2	HeLa, HuH7	RNA affinity chromatography, Electrophoretic mobility shift assay	Quantitative mass spectrometry of DENV-2 RNA-interacting proteins reveals that the DEAD-box RNA helicase DDX6 binds the DB1 and DB2 3' UTR structures.
3'-UTR	DDX6	1656	21957497	DENV2	HeLa, HuH7	RNA affinity chromatography, Electrophoretic mobility shift assay	Quantitative mass spectrometry of DENV-2 RNA-interacting proteins reveals that the DEAD-box RNA helicase DDX6 binds the DB1 and DB2 3' UTR structures.
3'-UTR	G3BP1	10146	21957497	DENV2	HeLa, HuH7	RNA affinity chromatography, Electrophoretic mobility shift assay	Quantitative mass spectrometry of DENV-2 RNA-interacting proteins reveals that the DEAD-box RNA helicase DDX6 binds the DB1 and DB2 3' UTR structures.
3'-UTR	G3BP2	9908	21957497	DENV2	HeLa, HuH7	RNA affinity chromatography, Electrophoretic mobility shift assay	Quantitative mass spectrometry of DENV-2 RNA-interacting proteins reveals that the DEAD-box RNA helicase DDX6 binds the DB1 and DB2 3' UTR structures.
3'-UTR	USP10	9100	21957497	DENV2	HeLa, HuH7	RNA affinity chromatography, Electrophoretic mobility shift assay	Quantitative mass spectrometry of DENV-2 RNA-interacting proteins reveals that the DEAD-box RNA helicase DDX6 binds the DB1 and DB2 3' UTR structures.
3'-UTR	EEF1A1	1915	23939980	DENV2	293, Monocyte derived Macrophages (MDM)		Reduced sphingosine kinase 1 activity in dengue virus type-2 infected cells can be mediated by the 3' untranslated region of dengue virus type-2 RNA.
3'-UTR	SPHK1	8877	23939980	DENV2	293, Monocyte derived Macrophages (MDM)		Reduced sphingosine kinase 1 activity in dengue virus type-2 infected cells can be mediated by the 3' untranslated region of dengue virus type-2 RNA.
3'-UTR	LSM1	27257	25872476			Co-localization by confocal immunofluorescence, siRNA	LSm1 binds to the Dengue virus RNA 3'Â UTR and is a positive regulator of Dengue virus replication.
3'-UTR	MAPK1	5594	26138103	DENV2	Huh7	RNA-immunoprecipitation followed by mass spectrometry	Dengue subgenomic RNA binds TRIM25 to inhibit interferon expression for epidemiological fitness
3'-UTR	MAVS	57506	26138103	DENV2	Huh7	RNA-immunoprecipitation followed by mass spectrometry	Dengue subgenomic RNA binds TRIM25 to inhibit interferon expression for epidemiological fitness
3'-UTR	PRDX3	10935	26138103	DENV2	Huh7	RNA-immunoprecipitation followed by mass spectrometry	Dengue subgenomic RNA binds TRIM25 to inhibit interferon expression for epidemiological fitness
3'-UTR	TRIM25	7706	26138103	DENV2	Huh7	RNA-immunoprecipitation followed by mass spectrometry	Dengue subgenomic RNA binds TRIM25 to inhibit interferon expression for epidemiological fitness
5'-UTR	PTBP1	5725	19380576	DENV2	BHK-21, Vero	RNA immunoprecipitation followed by mass spectrometry, Confocal immunofluorescence analysis, siRNA,	The polypyrimidine tract-binding protein is required for efficient dengue virus propagation and associates with the viral replication machinery.
5'-UTR	MIR548G	100313938	25499200	DENV1, DENV2, DENV3, DENV4	293T, BHK-21, Vero	ELISA, real-time RT-PCR	Cellular microRNA-miR-548g-3p modulates the replication of dengue virus.
C	HNRNPK	3190	11747608	DENV2	293T, BHK	In vitro binding assay, Co-immunoprecipitation analysis, GST pull-down assay	The heterogeneous nuclear ribonucleoprotein K (hnRNP K) interacts with dengue virus core protein.
C	DAXX	1616	17707345	DENV2	Yeast, HepG2	Y2H assay, Co-immunoprecipitation, Co-localization by double immunofluorescence staining	Sensitization to Fas-mediated apoptosis by dengue virus capsid protein.
C	EXOC1	55763	19889084	DENV2	HEK293	Y2H assay, Knock-down and over-expression studies, Co-immunoprecipitation	Human Sec3 protein is a novel transcriptional and translational repressor of flavivirus.
C	DAXX	1616	19944121	DENV2	HepG2	Co-localization analysis, Deletion analysis, Co-localization, Apoptosis assays	Nuclear localization of dengue virus capsid protein is required for DAXX interaction and apoptosis.
C	CLDN1	9076	19962368	DENV2	Yeast, Huh-7 cells	Y2H assay, Knock-down analysis, Co-immunoprecipitation	Novel binding between pre-membrane protein and claudin-1 is required for efficient dengue virus entry.
C	CCNT1	904	20618343	DENV2	Vero E6, Huh7, HepG2	siRNA, Immunofluorscence staining, Co-immunoprecipitation, Chromatin immunoprecipitation	Positive transcription elongation factor b (P-TEFb) contributes to dengue virus-stimulated induction of interleukin-8 (IL-8).
C	CDK9	1025	20618343	DENV2	Vero E6, Huh7, HepG2	siRNA, Immunofluorscence staining, Co-immunoprecipitation, Chromatin immunoprecipitation	Positive transcription elongation factor b (P-TEFb) contributes to dengue virus-stimulated induction of interleukin-8 (IL-8).
C	MX1	4599	20718508	DENV2	HUVECs	Co-localization studies	The ubiquitin-proteasome pathway is important for dengue virus infection in primary human endothelial cells.
C	ACY1	95	21281507	DENV2	Bacteria	Bacterial two hybrid assay	Dengue-2 structural proteins associate with human proteins to produce a coagulation and innate immune response biased interactome.
C	ALDOB	229	21281507	DENV2	Bacteria	Bacterial two hybrid assay	Dengue-2 structural proteins associate with human proteins to produce a coagulation and innate immune response biased interactome.
C	CLU	1191	21281507	DENV2	Bacteria	Bacterial two hybrid assay	Dengue-2 structural proteins associate with human proteins to produce a coagulation and innate immune response biased interactome.
C	HLA-B	3106	21281507	DENV2	Bacteria	Bacterial two hybrid assay	Dengue-2 structural proteins associate with human proteins to produce a coagulation and innate immune response biased interactome.
C	MBP	4155	21281507	DENV2	Bacteria	Bacterial two hybrid assay	Dengue-2 structural proteins associate with human proteins to produce a coagulation and innate immune response biased interactome.
C	MFAP3L	9848	21281507	DENV2	Bacteria	Bacterial two hybrid assay	Dengue-2 structural proteins associate with human proteins to produce a coagulation and innate immune response biased interactome.
C	MPRIP	23164	21281507	DENV2	Bacteria	Bacterial two hybrid assay	Dengue-2 structural proteins associate with human proteins to produce a coagulation and innate immune response biased interactome.
C	PCP4L1	654790	21281507	DENV2	Bacteria	Bacterial two hybrid assay	Dengue-2 structural proteins associate with human proteins to produce a coagulation and innate immune response biased interactome.
C	SLC24A2	25769	21281507	DENV2	Bacteria	Bacterial two hybrid assay	Dengue-2 structural proteins associate with human proteins to produce a coagulation and innate immune response biased interactome.
C	TUBA1A	7846	21281507	DENV2	Bacteria	Bacterial two hybrid assay	Dengue-2 structural proteins associate with human proteins to produce a coagulation and innate immune response biased interactome.
C	AFTPH	54812	21358811	DENV2	insilico	Computational analysis	Mapping protein interactions between Dengue virus and its human and insect hosts.
C	CSNK2A1	1457	21358811	DENV2	insilico	Computational analysis	Mapping protein interactions between Dengue virus and its human and insect hosts.
C	GAB1	2549	21358811	DENV2	insilico	Computational analysis	Mapping protein interactions between Dengue virus and its human and insect hosts.
C	UBE2I	7329	21358811	DENV2	insilico	Computational analysis	Mapping protein interactions between Dengue virus and its human and insect hosts.
C	ZAP70	7535	21358811	DENV2	insilico	Computational analysis	Mapping protein interactions between Dengue virus and its human and insect hosts.
C	CD38	952	21669186		HepG2	qRT-PCR, FACS	Role of CD137 signaling in dengue virus-mediated apoptosis
C	CUL3	8452	21669186		HepG2	qRT-PCR, FACS	Role of CD137 signaling in dengue virus-mediated apoptosis
C	HRK	8739	21669186		HepG2	qRT-PCR, FACS	Role of CD137 signaling in dengue virus-mediated apoptosis
C	IFI16	3428	21669186		HepG2	qRT-PCR, FACS	Role of CD137 signaling in dengue virus-mediated apoptosis
C	LCK	3932	21669186		HepG2	qRT-PCR, FACS	Role of CD137 signaling in dengue virus-mediated apoptosis
C	NLRP2	55655	21669186		HepG2	qRT-PCR, FACS	Role of CD137 signaling in dengue virus-mediated apoptosis
C	PDCD5	9141	21669186		HepG2	qRT-PCR, FACS	Role of CD137 signaling in dengue virus-mediated apoptosis
C	PLG	5340	21669186		HepG2	qRT-PCR, FACS	Role of CD137 signaling in dengue virus-mediated apoptosis
C	PMAIP1	5366	21669186		HepG2	qRT-PCR, FACS	Role of CD137 signaling in dengue virus-mediated apoptosis
C	PRKCE	5581	21669186		HepG2	qRT-PCR, FACS	Role of CD137 signaling in dengue virus-mediated apoptosis
C	SIPA1	6494	21669186		HepG2	qRT-PCR, FACS	Role of CD137 signaling in dengue virus-mediated apoptosis
C	TNF	7124	21669186		HepG2	qRT-PCR, FACS	Role of CD137 signaling in dengue virus-mediated apoptosis
C	TNFRSF9	3604	21669186	DENV2	HepG2	Real-time PCR, FACS	Role of CD137 signaling in dengue virus-mediated apoptosis.
C	TNFRSF9	3604	21669186		HepG2	qRT-PCR, FACS	Role of CD137 signaling in dengue virus-mediated apoptosis
C	TNFSF10	8743	21669186		HepG2	qRT-PCR, FACS	Role of CD137 signaling in dengue virus-mediated apoptosis
C	TP73	7161	21669186		HepG2	qRT-PCR, FACS	Role of CD137 signaling in dengue virus-mediated apoptosis
C	HIST2H2AC	8338	21909430	DENV2	Huh7	Tandem affinity purification followed by mass spectrometry, Co-immunoprecipitation, siRNA	Dengue virus capsid protein binds core histones and inhibits nucleosome formation in human liver cells.
C	HIST2H2BE	8349	21909430	DENV2	Huh7	Tandem affinity purification followed by mass spectrometry, Co-immunoprecipitation, siRNA	Dengue virus capsid protein binds core histones and inhibits nucleosome formation in human liver cells.
C	HIST2H3C	126961	21909430	DENV2	Huh7	Tandem affinity purification followed by mass spectrometry, Co-immunoprecipitation, siRNA	Dengue virus capsid protein binds core histones and inhibits nucleosome formation in human liver cells.
C	HIST4H4	121504	21909430	DENV2	Huh7	Tandem affinity purification followed by mass spectrometry, Co-immunoprecipitation, siRNA	Dengue virus capsid protein binds core histones and inhibits nucleosome formation in human liver cells.
C	CAMLG	819	22281498	DENV2	Yeast, Huh7	Y2H assay, Co-immunoprecipitation, Knock down and over-expression studies	Dengue virus utilizes calcium modulating cyclophilin-binding ligand to subvert apoptosis.
C	HMGB1	3146	22860034	DENV2	K562, HUVEC	Indirect Immunofluorescence Microscopy, Western Blot, siRNA, ELISA	Dengue virus infection mediates HMGB1 release from monocytes involving PCAF acetylase complex and induces vascular leakage in endothelial cells.
C	KAT2B	8850	22860034	DENV2	K562, HUVEC	Indirect Immunofluorescence Microscopy, Western Blot, siRNA, ELISA	Dengue virus infection mediates HMGB1 release from monocytes involving PCAF acetylase complex and induces vascular leakage in endothelial cells.
C	ANKRD12	23253	23326450	DENV1, DENV2, DENV3, DENV4	Yeast	Y2H assay	Identification of new protein interactions between dengue fever virus and its hosts, human and mosquito.
C	AP3B1	8546	23326450	DENV1, DENV2, DENV3, DENV4	Yeast	Y2H assay	Identification of new protein interactions between dengue fever virus and its hosts, human and mosquito.
C	BIRC2	329	23326450	DENV1, DENV2, DENV3, DENV4	Yeast	Y2H assay	Identification of new protein interactions between dengue fever virus and its hosts, human and mosquito.
C	BOD1L1	259282	23326450	DENV1, DENV2, DENV3, DENV4	Yeast	Y2H assay	Identification of new protein interactions between dengue fever virus and its hosts, human and mosquito.
C	CD3G	917	23326450	DENV1, DENV2, DENV3, DENV4	Yeast	Y2H assay	Identification of new protein interactions between dengue fever virus and its hosts, human and mosquito.
C	DENND1C	79958	23326450	DENV1, DENV2, DENV3, DENV4	Yeast	Y2H assay	Identification of new protein interactions between dengue fever virus and its hosts, human and mosquito.
C	GTPBP4	23560	23326450	DENV1, DENV2, DENV3, DENV4	Yeast	Y2H assay	Identification of new protein interactions between dengue fever virus and its hosts, human and mosquito.
C	HBA1	3039	23326450	DENV1, DENV2, DENV3, DENV4	Yeast	Y2H assay	Identification of new protein interactions between dengue fever virus and its hosts, human and mosquito.
C	HBB	3043	23326450	DENV1, DENV2, DENV3, DENV4	Yeast	Y2H assay	Identification of new protein interactions between dengue fever virus and its hosts, human and mosquito.
C	NAP1L1	4673	23326450	DENV1, DENV2, DENV3, DENV4	Yeast	Y2H assay	Identification of new protein interactions between dengue fever virus and its hosts, human and mosquito.
C	OS9	10956	23326450	DENV1, DENV2, DENV3, DENV4	Yeast	Y2H assay	Identification of new protein interactions between dengue fever virus and its hosts, human and mosquito.
C	RPL5	6125	23326450	DENV1, DENV2, DENV3, DENV4	Yeast	Y2H assay	Identification of new protein interactions between dengue fever virus and its hosts, human and mosquito.
C	RPL6	6128	23326450	DENV1, DENV2, DENV3, DENV4	Yeast	Y2H assay	Identification of new protein interactions between dengue fever virus and its hosts, human and mosquito.
C	RPS27	6232	23326450	DENV1, DENV2, DENV3, DENV4	Yeast	Y2H assay	Identification of new protein interactions between dengue fever virus and its hosts, human and mosquito.
C	RPS7	6201	23326450	DENV1, DENV2, DENV3, DENV4	Yeast	Y2H assay	Identification of new protein interactions between dengue fever virus and its hosts, human and mosquito.
C	RRP12	23223	23326450	DENV1, DENV2, DENV3, DENV4	Yeast	Y2H assay	Identification of new protein interactions between dengue fever virus and its hosts, human and mosquito.
C	S100A9	6280	23326450	DENV1, DENV2, DENV3, DENV4	Yeast	Y2H assay	Identification of new protein interactions between dengue fever virus and its hosts, human and mosquito.
C	TMF1	7110	23326450	DENV1, DENV2, DENV3, DENV4	Yeast	Y2H assay	Identification of new protein interactions between dengue fever virus and its hosts, human and mosquito.
C	ZNF394	84124	23326450	DENV1, DENV2, DENV3, DENV4	Yeast	Y2H assay	Identification of new protein interactions between dengue fever virus and its hosts, human and mosquito.
C	EXOC1	55763	23522008	DENV2	293, hSec3pOE (hSec3p overexpressing_x000D_ 293 cells), hSec3pKD (293 cells knocked down for hSec3p)_x000D_	Co-immunoprecipitation, Mutational analysis, Inhibition studies	West Nile virus and dengue virus capsid protein negates the antiviral activity of human Sec3 protein through the proteasome pathway.
C	APOE	348	23792329	DENV2	Human lipoproteins isolated from human blood plasma	Atomic force microscopy-based force spectroscopy, Dynamic light scattering, NMR, Computational analysis	Dengue virus capsid protein interacts specifically with very low-density lipoproteins.
C	PLIN3	10226	23792329	DENV2	Human lipoproteins isolated from human blood plasma	Atomic force microscopy-based force spectroscopy, Dynamic light scattering, NMR, Computational analysis	Dengue virus capsid protein interacts specifically with very low-density lipoproteins.
C	NCL	4691	24027323	DENV2	293, Vero	Co-localization, siRNA, Co-immunoprecipitation followed by mass spectrometry	Nucleolin interacts with the dengue virus capsid protein and plays a role in formation of infectious virus particles.
C	DAXX	1616	25019989	DENV2	HepG2	Co-immunoprecipitation_x000D_, siRNA	Dengue virus disrupts Daxx and NF-?B interaction to induce CD137-mediated apoptosis.
C	APOE	348	26161501			Structure and sequence comparison, AFM-based force spectroscopy inhibition assay,	Understanding Dengue Virus Capsid Protein Interaction with Key Biological Targets.
C	PLIN3	10226	26161501			Structure and sequence comparison, AFM-based force spectroscopy inhibition assay,	Understanding Dengue Virus Capsid Protein Interaction with Key Biological Targets.
DENV RNA	XRN1	54464	24692447	DENV2	Cell free systems	Native gel electrophoresis, Chemical probing assay	RNA structures that resist degradation by Xrn1 produce a pathogenic Dengue virus RNA.
DENV RNA	HNRNPC	3183	25890165	DENV2	Huh7	Co-immunoprecipitation, siRNA	Role of human heterogeneous nuclear ribonucleoprotein C1/C2 in dengue virus replication.
E	PLG	5340	11129636	DENV1, DENV2, DENV3, DENV4	Cell free assays	Fibrin/Fibrinolysis assays, Fibrinogen/Fibrinolysis assays, Binding assays	Participation of the Dengue Virus in the Fibrinolytic Process
E	UBE2I	7329	17265167	DENV2	Yeast, BHK-21, 293	Y2H assay, Co-immunoprecipitation, site directed mutagenesis	The type 2 dengue virus envelope protein interacts with small ubiquitin-like modifier-1 (SUMO-1) conjugating enzyme 9 (Ubc9).
E	M6PR	4074	18266465	DENV2	NIH3T3	Cell binding assay, FACS, Immunofluorescence microscopy	The Mannose Receptor Mediates Dengue Virus Infection of Macrophages
E	CALR	811	19105951	DENV2	Yeast, Vero	Y2H assay, Co-immunoprecipitation analysis, Co-localization analysis, siRNA	Interaction of dengue virus envelope protein with endoplasmic reticulum-resident chaperones facilitates dengue virus production.
E	CANX	821	19105951	DENV2	Yeast, Vero	Y2H assay, Co-immunoprecipitation analysis, Co-localization analysis, siRNA	Interaction of dengue virus envelope protein with endoplasmic reticulum-resident chaperones facilitates dengue virus production.
E	HSPA5	3309	19105951	DENV2	Yeast, Vero	Y2H assay, Co-immunoprecipitation analysis, Co-localization analysis, siRNA	Interaction of dengue virus envelope protein with endoplasmic reticulum-resident chaperones facilitates dengue virus production.
E	RAC1	5879	20824170	DENV2	ECV304, Vero	Inhibition studies, Co-localization with Confocal microscopy, Co-immunoprecipitation	Roles of small GTPase Rac1 in the regulation of actin cytoskeleton during dengue virus infection.
E	SERPINE1	5054	20886187	DENV2	Huh7	RT-PCR, Western blot, immunofluorescence, inhibition assay	The dengue virus envelope protein induced PAI-1 gene expression via MEK/ERK pathways.
E	ARHGEF11	9826	21281507	DENV2	Bacteria	Bacterial two hybrid assay	Dengue-2 structural proteins associate with human proteins to produce a coagulation and innate immune response biased interactome.
E	BAAT	570	21281507	DENV2	Bacteria	Bacterial two hybrid assay	Dengue-2 structural proteins associate with human proteins to produce a coagulation and innate immune response biased interactome.
E	CLIC2	1193	21281507	DENV2	Bacteria	Bacterial two hybrid assay	Dengue-2 structural proteins associate with human proteins to produce a coagulation and innate immune response biased interactome.
E	F8	2157	21281507	DENV2	Bacteria	Bacterial two hybrid assay	Dengue-2 structural proteins associate with human proteins to produce a coagulation and innate immune response biased interactome.
E	HPX	3263	21281507	DENV2	Bacteria	Bacterial two hybrid assay	Dengue-2 structural proteins associate with human proteins to produce a coagulation and innate immune response biased interactome.
E	IPO13	9670	21281507	DENV2	Bacteria	Bacterial two hybrid assay	Dengue-2 structural proteins associate with human proteins to produce a coagulation and innate immune response biased interactome.
E	MTRNR2L1	100462977	21281507	DENV2	Bacteria	Bacterial two hybrid assay	Dengue-2 structural proteins associate with human proteins to produce a coagulation and innate immune response biased interactome.
E	NRGN	4900	21281507	DENV2	Bacteria	Bacterial two hybrid assay	Dengue-2 structural proteins associate with human proteins to produce a coagulation and innate immune response biased interactome.
E	PLG	5340	21281507	DENV2	Bacteria	Bacterial two hybrid assay	Dengue-2 structural proteins associate with human proteins to produce a coagulation and innate immune response biased interactome.
E	RUFY3	22902	21281507	DENV2	Bacteria	Bacterial two hybrid assay	Dengue-2 structural proteins associate with human proteins to produce a coagulation and innate immune response biased interactome.
E	SMU1	55234	21281507	DENV2	Bacteria	Bacterial two hybrid assay	Dengue-2 structural proteins associate with human proteins to produce a coagulation and innate immune response biased interactome.
E	TMOD1	7111	21281507	DENV2	Bacteria	Bacterial two hybrid assay	Dengue-2 structural proteins associate with human proteins to produce a coagulation and innate immune response biased interactome.
E	ADRA1D	146	21358811	DENV2	insilico	Computational analysis	Mapping protein interactions between Dengue virus and its human and insect hosts.
E	AFTPH	54812	21358811	DENV2	insilico	Computational analysis	Mapping protein interactions between Dengue virus and its human and insect hosts.
E	AP1M1	8907	21358811	DENV2	insilico	Computational analysis	Mapping protein interactions between Dengue virus and its human and insect hosts.
E	CSNK2A1	1457	21358811	DENV2	insilico	Computational analysis	Mapping protein interactions between Dengue virus and its human and insect hosts.
E	GAB1	2549	21358811	DENV2	insilico	Computational analysis	Mapping protein interactions between Dengue virus and its human and insect hosts.
E	IRF3	3661	21358811	DENV2	insilico	Computational analysis	Mapping protein interactions between Dengue virus and its human and insect hosts.
E	UBE3A	7337	21358811	DENV2	insilico	Computational analysis	Mapping protein interactions between Dengue virus and its human and insect hosts.
E	ZAP70	7535	21358811	DENV2	insilico	Computational analysis	Mapping protein interactions between Dengue virus and its human and insect hosts.
E	CD209	30835	23124109	DENV2	Raji/DC-SIGN+ cells, Monocyte derived Dendritic cells (MDDCs)	Mutation analysis	Crucial role of the N-glycans on the viral E-envelope glycoprotein in DC-SIGN-mediated dengue virus infection.
E	RPSA	3921	23137297	DENV1, DENV2	invitro studies	in-vitro immunochemical and spectrofluorimetric methods, Indirect ELISA, Competitive ELISA	The folded and disordered domains of human ribosomal protein SA have both idiosyncratic and shared functions as membrane receptors.
E	ACTB	60	23376163	DENV2	Vero, ECV304	Modified virus overlay protein binding assay, Competition studies, Co-immunoprecipitation assays, Co-localization assays	Identification and characterization of a 43Â kDa actin protein involved in the DENV-2 binding and infection of ECV304 cells.
E	CD209	30835	23527139	DENV1, DENV2, DENV3, DENV4	insilico	Computational analysis	Interaction and inhibition of dengue envelope glycoprotein with mammalian receptor DC-sign, an in-silico approach.
E	APCS	325	25100798	DENV1, DENV2, DENV3, DENV4	Vero, Huh7.5	Affinity chromatography, Surface Plasmon Resonance (SPR)	Receptor-activated human ?2-macroglobulin interacts with the envelope protein of dengue virus and protects virions from temperature-induced inactivation through multivalent binding.
E	ARF1	375	26031340	DENV2		Immunofluorescence assays, Subcellular fractionation, Inhibition studies	Dengue Virus Uses a Non-Canonical Function of the Host GBF1-Arf-COPI System for Capsid Protein Accumulation on Lipid Droplets.
E	ARF4	378	26031340	DENV2		Immunofluorescence assays, Subcellular fractionation, Inhibition studies	Dengue Virus Uses a Non-Canonical Function of the Host GBF1-Arf-COPI System for Capsid Protein Accumulation on Lipid Droplets.
E	GBF1	8729	26031340	DENV2		Immunofluorescence assays, Subcellular fractionation, Inhibition studies	Dengue Virus Uses a Non-Canonical Function of the Host GBF1-Arf-COPI System for Capsid Protein Accumulation on Lipid Droplets.
M	DYNLT1	6993	21767858	DENV1, DENV2, DENV3, DENV4	Yeast, 293A, 293T, HepG2, Vero	Y2H assay, GST pull-down assays, siRNA	The interaction of flavivirus M protein with light chain Tctex-1 of human dynein plays a role in late stages of virus replication.
M	DDX24	57062	21911577	DENV2	Yeast	Y2H assay	A physical interaction network of dengue virus and human proteins.
M	FUNDC1	139341	21911577	DENV2	Yeast	Y2H assay	A physical interaction network of dengue virus and human proteins.
M	FUNDC2	65991	21911577	DENV2	Yeast	Y2H assay	A physical interaction network of dengue virus and human proteins.
M	ARF4	378	22105072	DENV1, DENV2, DENV3, DENV4	HeLa, 293T, HepG2	Co-immunoprecipitation, siRNA, Co-localization	Class II ADP-ribosylation factors are required for efficient secretion of dengue viruses.
M	ARF5	381	22105072	DENV1, DENV2, DENV3, DENV4	HeLa, 293T, HepG2	Co-immunoprecipitation, siRNA, Co-localization	Class II ADP-ribosylation factors are required for efficient secretion of dengue viruses.
M	CLDN1	9076	24074594	DENV1, DENV2, DENV3, DENV4	Huh7.5	siRNA, Pull-down assay, Knock-down analysis	The interaction between claudin-1 and dengue viral prM/M protein for its entry.
NS1	STAT3	6774	15878791	DENV2	BHK-21	Y2H assay, Co-immunoprecipitation, Co-localization by immunofluorescence microscopy	Recombinant non-structural 1 (NS1) protein of dengue-2 virus interacts with human STAT3beta protein.
NS1	CLU	1191	17825259	DENV2	Vero, 293T	Affinity purification followed by mass spectrometry	Secreted complement regulatory protein clusterin interacts with dengue virus nonstructural protein 1.
NS1	HNRNPC	3183	18471994	DENV2	293T	Co-immunoprecipitation, Two-dimensional gel electrophoresis and Mass spectrometry	Identification of human hnRNP C1/C2 as a dengue virus NS1-interacting protein.
NS1	ATP5B	506	18997103	DHF, DENV1, DENV2, DENV3, DENV4	HMEC-1, Sera from DHF patients	2-D PAGE followed MS Analyses, Western blot, Confocal microscopy, Cell binding assay, ELISA	Proteomic Analysis of Endothelial Cell Autoantigens Recognized by Anti-Dengue Virus Nonstructural Protein 1 Antibodies
NS1	HSPD1	3329	18997103	DHF, DENV1, DENV2, DENV3, DENV4	HMEC-1, Sera from DHF patients	2-D PAGE followed MS Analyses, Western blot, Confocal microscopy, Cell binding assay, ELISA	Proteomic Analysis of Endothelial Cell Autoantigens Recognized by Anti-Dengue Virus Nonstructural Protein 1 Antibodies
NS1	PDIA3	2923	18997103	DHF, DENV1, DENV2, DENV3, DENV4	HMEC-1, Sera from DHF patients	2-D PAGE followed MS Analyses, Western blot, Confocal microscopy, Cell binding assay, ELISA	Proteomic Analysis of Endothelial Cell Autoantigens Recognized by Anti-Dengue Virus Nonstructural Protein 1 Antibodies
NS1	PDIA6	10130	18997103	DHF, DENV1, DENV2, DENV3, DENV4	HMEC-1, Sera from DHF patients	2-D PAGE followed MS Analyses, Western blot, Confocal microscopy, Cell binding assay, ELISA	Proteomic Analysis of Endothelial Cell Autoantigens Recognized by Anti-Dengue Virus Nonstructural Protein 1 Antibodies
NS1	VIM	7431	18997103	DHF, DENV1, DENV2, DENV3, DENV4	HMEC-1, Sera from DHF patients	2-D PAGE followed MS Analyses, Western blot, Confocal microscopy, Cell binding assay, ELISA	Proteomic Analysis of Endothelial Cell Autoantigens Recognized by Anti-Dengue Virus Nonstructural Protein 1 Antibodies
NS1	PTB	5725	19692542	DENV2	Vero, Huh7	Immunofluorescence microscopy, siRNA	Polypyrimidine tract-binding protein is relocated to the cytoplasm and is required during dengue virus infection in Vero cells.
NS1	PDIA2	64714	19822367	DHF	Platelets isolated from Human peripheral blood	Western blotting, ELISA, Thiol isomerase activity, ADP-stimulated platelet aggregation assay, Platelet binding assay	Anti-dengue virus nonstructural protein 1 antibodies recognize protein disulfide isomerase on platelets and inhibit platelet aggregation.
NS1	VIM	7431	20567765	DENV2	EA.hy926	Immunoprecipitation, 2-D PAGE, Mass spectrometric analyses	Vimentin interacts with heterogeneous nuclear ribonucleoproteins and dengue nonstructural protein 1 and is important for viral replication and release.
NS1	CSNK2A1	1457	21358811	DENV2	insilico	Computational analysis	Mapping protein interactions between Dengue virus and its human and insect hosts.
NS1	GAB1	2549	21358811	DENV2	insilico	Computational analysis	Mapping protein interactions between Dengue virus and its human and insect hosts.
NS1	RELA	5970	21424730	DENV1	HepG2	Western blot, Confocal microscopy	The dengue virus nonstructural protein 1 (NS1) increases NF-κB transcriptional activity in HepG2 cells.
NS1	C1S	716	21429549	DENV2	BHK-21	ELISA	N-linked glycosylation of dengue virus NS1 protein modulates secretion, cell-surface expression, hexamer stability, and interactions with human complement.
NS1	C4A	720	21429549	DENV2	BHK-21	ELISA	N-linked glycosylation of dengue virus NS1 protein modulates secretion, cell-surface expression, hexamer stability, and interactions with human complement.
NS1	C4B	721	21429549	DENV2	BHK-21	ELISA	N-linked glycosylation of dengue virus NS1 protein modulates secretion, cell-surface expression, hexamer stability, and interactions with human complement.
NS1	C4BPA	722	21642539	DENV2	BHK	Binding ELISA assay, Co-immunoprecipitation, Mutation analysis	Binding of flavivirus nonstructural protein NS1 to C4b binding protein modulates complement activation.
NS1	AMER1	139285	21911577	DENV2	Yeast	Y2H assay	A physical interaction network of dengue virus and human proteins.
NS1	EIF4G2	1982	21911577	DENV2	Yeast	Y2H assay	A physical interaction network of dengue virus and human proteins.
NS1	FGB	2244	21911577	DENV2	Yeast	Y2H assay	A physical interaction network of dengue virus and human proteins.
NS1	LAMB1	3912	21911577	DENV2	Yeast	Y2H assay	A physical interaction network of dengue virus and human proteins.
NS1	PAIP1	10605	21911577	DENV2	Yeast	Y2H assay	A physical interaction network of dengue virus and human proteins.
NS1	PTBP1	5725	21911577	DENV2	Yeast	Y2H assay	A physical interaction network of dengue virus and human proteins.
NS1	SERPIND1	3053	21911577	DENV2	Yeast	Y2H assay	A physical interaction network of dengue virus and human proteins.
NS1	SPTBN2	6712	21911577	DENV2	Yeast	Y2H assay	A physical interaction network of dengue virus and human proteins.
NS1	SRFBP1	153443	21911577	DENV2	Yeast	Y2H assay	A physical interaction network of dengue virus and human proteins.
NS1	TAB2	23118	21911577	DENV2	Yeast	Y2H assay	A physical interaction network of dengue virus and human proteins.
NS1	TCF7L2	6934	21911577	DENV2	Yeast	Y2H assay	A physical interaction network of dengue virus and human proteins.
NS1	WWC1	23286	21911577	DENV2	Yeast	Y2H assay	A physical interaction network of dengue virus and human proteins.
NS1	F2	2147	22138554	DENV2, DHF	Patient serum	Western blotting, binding ELISA, Pull down assay, Thrombin activity assay, Prothrombin activation assay	Dengue virus nonstructural protein NS1 binds to prothrombin/thrombin and inhibits prothrombin activation.
NS1	AKT1	207	23103292	DHF	Serum from DHF patient, HUVEC	Western blot, Inhibition assay, FACS	Antibodies against dengue virus nonstructural protein-1 induce heme oxygenase-1 via a redox-dependent pathway in human endothelial cells.
NS1	HMOX1	3162	23103292	DHF	Serum from DHF patient, HUVEC	Western blot, Inhibition assay, FACS	Antibodies against dengue virus nonstructural protein-1 induce heme oxygenase-1 via a redox-dependent pathway in human endothelial cells.
NS1	PDIA2	64714	23103292	DHF	Serum from DHF patient, HUVEC	Western blot, Inhibition assay, FACS	Antibodies against dengue virus nonstructural protein-1 induce heme oxygenase-1 via a redox-dependent pathway in human endothelial cells.
NS1	ACTG1	71	23516407	DENV2	Yeast	Y2H assay	Mapping the interactions of dengue virus NS1 protein with human liver proteins using a yeast two-hybrid system: identification of C1q as an interacting partner.
NS1	ADGRE2	30817	23516407	DENV2	Yeast	Y2H assay	Mapping the interactions of dengue virus NS1 protein with human liver proteins using a yeast two-hybrid system: identification of C1q as an interacting partner.
NS1	ADH1B	125	23516407	DENV2	Yeast	Y2H assay	Mapping the interactions of dengue virus NS1 protein with human liver proteins using a yeast two-hybrid system: identification of C1q as an interacting partner.
NS1	AHSG	197	23516407	DENV2	Yeast	Y2H assay	Mapping the interactions of dengue virus NS1 protein with human liver proteins using a yeast two-hybrid system: identification of C1q as an interacting partner.
NS1	ALDH1L1	10840	23516407	DENV2	Yeast	Y2H assay	Mapping the interactions of dengue virus NS1 protein with human liver proteins using a yeast two-hybrid system: identification of C1q as an interacting partner.
NS1	ALDH7A1	501	23516407	DENV2	Yeast	Y2H assay	Mapping the interactions of dengue virus NS1 protein with human liver proteins using a yeast two-hybrid system: identification of C1q as an interacting partner.
NS1	ALDOB	229	23516407	DENV2	Yeast	Y2H assay	Mapping the interactions of dengue virus NS1 protein with human liver proteins using a yeast two-hybrid system: identification of C1q as an interacting partner.
NS1	AMBP	259	23516407	DENV2	Yeast	Y2H assay	Mapping the interactions of dengue virus NS1 protein with human liver proteins using a yeast two-hybrid system: identification of C1q as an interacting partner.
NS1	APEH	327	23516407	DENV2	Yeast	Y2H assay	Mapping the interactions of dengue virus NS1 protein with human liver proteins using a yeast two-hybrid system: identification of C1q as an interacting partner.
NS1	APOA2	336	23516407	DENV2	Yeast	Y2H assay	Mapping the interactions of dengue virus NS1 protein with human liver proteins using a yeast two-hybrid system: identification of C1q as an interacting partner.
NS1	APOH	350	23516407	DENV2	Yeast	Y2H assay	Mapping the interactions of dengue virus NS1 protein with human liver proteins using a yeast two-hybrid system: identification of C1q as an interacting partner.
NS1	AZGP1	563	23516407	DENV2	Yeast	Y2H assay	Mapping the interactions of dengue virus NS1 protein with human liver proteins using a yeast two-hybrid system: identification of C1q as an interacting partner.
NS1	BCKDHA	593	23516407	DENV2	Yeast	Y2H assay	Mapping the interactions of dengue virus NS1 protein with human liver proteins using a yeast two-hybrid system: identification of C1q as an interacting partner.
NS1	BDH1	622	23516407	DENV2	Yeast	Y2H assay	Mapping the interactions of dengue virus NS1 protein with human liver proteins using a yeast two-hybrid system: identification of C1q as an interacting partner.
NS1	C1QA	712	23516407	DENV2	Yeast	Y2H assay	Mapping the interactions of dengue virus NS1 protein with human liver proteins using a yeast two-hybrid system: identification of C1q as an interacting partner.
NS1	C4A	720	23516407	DENV2	Yeast	Y2H assay	Mapping the interactions of dengue virus NS1 protein with human liver proteins using a yeast two-hybrid system: identification of C1q as an interacting partner.
NS1	CCS	9973	23516407	DENV2	Yeast	Y2H assay	Mapping the interactions of dengue virus NS1 protein with human liver proteins using a yeast two-hybrid system: identification of C1q as an interacting partner.
NS1	CD14	929	23516407	DENV2	Yeast	Y2H assay	Mapping the interactions of dengue virus NS1 protein with human liver proteins using a yeast two-hybrid system: identification of C1q as an interacting partner.
NS1	CES1	1066	23516407	DENV2	Yeast	Y2H assay	Mapping the interactions of dengue virus NS1 protein with human liver proteins using a yeast two-hybrid system: identification of C1q as an interacting partner.
NS1	COL18A1	80781	23516407	DENV2	Yeast	Y2H assay	Mapping the interactions of dengue virus NS1 protein with human liver proteins using a yeast two-hybrid system: identification of C1q as an interacting partner.
NS1	CTSB	1508	23516407	DENV2	Yeast	Y2H assay	Mapping the interactions of dengue virus NS1 protein with human liver proteins using a yeast two-hybrid system: identification of C1q as an interacting partner.
NS1	CUTA	51596	23516407	DENV2	Yeast	Y2H assay	Mapping the interactions of dengue virus NS1 protein with human liver proteins using a yeast two-hybrid system: identification of C1q as an interacting partner.
NS1	ECHDC1	55862	23516407	DENV2	Yeast	Y2H assay	Mapping the interactions of dengue virus NS1 protein with human liver proteins using a yeast two-hybrid system: identification of C1q as an interacting partner.
NS1	EEF1A1	1915	23516407	DENV2	Yeast	Y2H assay	Mapping the interactions of dengue virus NS1 protein with human liver proteins using a yeast two-hybrid system: identification of C1q as an interacting partner.
NS1	ENTPD5	957	23516407	DENV2	Yeast	Y2H assay	Mapping the interactions of dengue virus NS1 protein with human liver proteins using a yeast two-hybrid system: identification of C1q as an interacting partner.
NS1	FAH	2184	23516407	DENV2	Yeast	Y2H assay	Mapping the interactions of dengue virus NS1 protein with human liver proteins using a yeast two-hybrid system: identification of C1q as an interacting partner.
NS1	FH	2271	23516407	DENV2	Yeast	Y2H assay	Mapping the interactions of dengue virus NS1 protein with human liver proteins using a yeast two-hybrid system: identification of C1q as an interacting partner.
NS1	GPX2	2877	23516407	DENV2	Yeast	Y2H assay	Mapping the interactions of dengue virus NS1 protein with human liver proteins using a yeast two-hybrid system: identification of C1q as an interacting partner.
NS1	HP	3240	23516407	DENV2	Yeast	Y2H assay	Mapping the interactions of dengue virus NS1 protein with human liver proteins using a yeast two-hybrid system: identification of C1q as an interacting partner.
NS1	HPN	3249	23516407	DENV2	Yeast	Y2H assay	Mapping the interactions of dengue virus NS1 protein with human liver proteins using a yeast two-hybrid system: identification of C1q as an interacting partner.
NS1	HPX	3263	23516407	DENV2	Yeast	Y2H assay	Mapping the interactions of dengue virus NS1 protein with human liver proteins using a yeast two-hybrid system: identification of C1q as an interacting partner.
NS1	LSR	51599	23516407	DENV2	Yeast	Y2H assay	Mapping the interactions of dengue virus NS1 protein with human liver proteins using a yeast two-hybrid system: identification of C1q as an interacting partner.
NS1	MAOB	4129	23516407	DENV2	Yeast	Y2H assay	Mapping the interactions of dengue virus NS1 protein with human liver proteins using a yeast two-hybrid system: identification of C1q as an interacting partner.
NS1	MPND	84954	23516407	DENV2	Yeast	Y2H assay	Mapping the interactions of dengue virus NS1 protein with human liver proteins using a yeast two-hybrid system: identification of C1q as an interacting partner.
NS1	MT2A	4502	23516407	DENV2	Yeast	Y2H assay	Mapping the interactions of dengue virus NS1 protein with human liver proteins using a yeast two-hybrid system: identification of C1q as an interacting partner.
NS1	MTERF4	130916	23516407	DENV2	Yeast	Y2H assay	Mapping the interactions of dengue virus NS1 protein with human liver proteins using a yeast two-hybrid system: identification of C1q as an interacting partner.
NS1	MTHFD1	4522	23516407	DENV2	Yeast	Y2H assay	Mapping the interactions of dengue virus NS1 protein with human liver proteins using a yeast two-hybrid system: identification of C1q as an interacting partner.
NS1	PARP12	64761	23516407	DENV2	Yeast	Y2H assay	Mapping the interactions of dengue virus NS1 protein with human liver proteins using a yeast two-hybrid system: identification of C1q as an interacting partner.
NS1	PCK2	5106	23516407	DENV2	Yeast	Y2H assay	Mapping the interactions of dengue virus NS1 protein with human liver proteins using a yeast two-hybrid system: identification of C1q as an interacting partner.
NS1	PKD1	5310	23516407	DENV2	Yeast	Y2H assay	Mapping the interactions of dengue virus NS1 protein with human liver proteins using a yeast two-hybrid system: identification of C1q as an interacting partner.
NS1	PLG	5340	23516407	DENV2	Yeast	Y2H assay	Mapping the interactions of dengue virus NS1 protein with human liver proteins using a yeast two-hybrid system: identification of C1q as an interacting partner.
NS1	PSAP	5660	23516407	DENV2	Yeast	Y2H assay	Mapping the interactions of dengue virus NS1 protein with human liver proteins using a yeast two-hybrid system: identification of C1q as an interacting partner.
NS1	RBP4	5950	23516407	DENV2	Yeast	Y2H assay	Mapping the interactions of dengue virus NS1 protein with human liver proteins using a yeast two-hybrid system: identification of C1q as an interacting partner.
NS1	RELN	5649	23516407	DENV2	Yeast	Y2H assay	Mapping the interactions of dengue virus NS1 protein with human liver proteins using a yeast two-hybrid system: identification of C1q as an interacting partner.
NS1	SAT1	6303	23516407	DENV2	Yeast	Y2H assay	Mapping the interactions of dengue virus NS1 protein with human liver proteins using a yeast two-hybrid system: identification of C1q as an interacting partner.
NS1	SEPP1	6414	23516407	DENV2	Yeast	Y2H assay	Mapping the interactions of dengue virus NS1 protein with human liver proteins using a yeast two-hybrid system: identification of C1q as an interacting partner.
NS1	SIVA1	10572	23516407	DENV2	Yeast	Y2H assay	Mapping the interactions of dengue virus NS1 protein with human liver proteins using a yeast two-hybrid system: identification of C1q as an interacting partner.
NS1	SUGCT	79783	23516407	DENV2	Yeast	Y2H assay	Mapping the interactions of dengue virus NS1 protein with human liver proteins using a yeast two-hybrid system: identification of C1q as an interacting partner.
NS1	TF	7018	23516407	DENV2	Yeast	Y2H assay	Mapping the interactions of dengue virus NS1 protein with human liver proteins using a yeast two-hybrid system: identification of C1q as an interacting partner.
NS1	THNSL1	79896	23516407	DENV2	Yeast	Y2H assay	Mapping the interactions of dengue virus NS1 protein with human liver proteins using a yeast two-hybrid system: identification of C1q as an interacting partner.
NS1	ANXA2	302	23697814	DENV2	HMEC-1	Suppression subtractive hybridization, qRT-PCR	Differentially expressed genes of human microvascular endothelial cells in response to anti-dengue virus NS1 antibodies by suppression subtractive hybridization.
NS1	ARL6IP5	10550	23697814	DENV2	HMEC-1	Suppression subtractive hybridization, qRT-PCR	Differentially expressed genes of human microvascular endothelial cells in response to anti-dengue virus NS1 antibodies by suppression subtractive hybridization.
NS1	ARNT	405	23697814	DENV2	HMEC-1	Suppression subtractive hybridization, qRT-PCR	Differentially expressed genes of human microvascular endothelial cells in response to anti-dengue virus NS1 antibodies by suppression subtractive hybridization.
NS1	CD59	966	23697814	DENV2	HMEC-1	Suppression subtractive hybridization, qRT-PCR	Differentially expressed genes of human microvascular endothelial cells in response to anti-dengue virus NS1 antibodies by suppression subtractive hybridization.
NS1	CENPQ	55166	23697814	DENV2	HMEC-1	Suppression subtractive hybridization, qRT-PCR	Differentially expressed genes of human microvascular endothelial cells in response to anti-dengue virus NS1 antibodies by suppression subtractive hybridization.
NS1	COMMD1	150684	23697814	DENV2	HMEC-1	Suppression subtractive hybridization, qRT-PCR	Differentially expressed genes of human microvascular endothelial cells in response to anti-dengue virus NS1 antibodies by suppression subtractive hybridization.
NS1	EIF2A	83939	23697814	DENV2	HMEC-1	Suppression subtractive hybridization, qRT-PCR	Differentially expressed genes of human microvascular endothelial cells in response to anti-dengue virus NS1 antibodies by suppression subtractive hybridization.
NS1	MAD2L1	4085	23697814	DENV2	HMEC-1	Suppression subtractive hybridization, qRT-PCR	Differentially expressed genes of human microvascular endothelial cells in response to anti-dengue virus NS1 antibodies by suppression subtractive hybridization.
NS1	NUCKS1	64710	23697814	DENV2	HMEC-1	Suppression subtractive hybridization, qRT-PCR	Differentially expressed genes of human microvascular endothelial cells in response to anti-dengue virus NS1 antibodies by suppression subtractive hybridization.
NS1	PSMA8	143471	23697814	DENV2	HMEC-1	Suppression subtractive hybridization, qRT-PCR	Differentially expressed genes of human microvascular endothelial cells in response to anti-dengue virus NS1 antibodies by suppression subtractive hybridization.
NS1	RPL10	6134	23697814	DENV2	HMEC-1	Suppression subtractive hybridization, qRT-PCR	Differentially expressed genes of human microvascular endothelial cells in response to anti-dengue virus NS1 antibodies by suppression subtractive hybridization.
NS1	S100A6	6277	23697814	DENV2	HMEC-1	Suppression subtractive hybridization, qRT-PCR	Differentially expressed genes of human microvascular endothelial cells in response to anti-dengue virus NS1 antibodies by suppression subtractive hybridization.
NS1	SKA2	348235	23697814	DENV2	HMEC-1	Suppression subtractive hybridization, qRT-PCR	Differentially expressed genes of human microvascular endothelial cells in response to anti-dengue virus NS1 antibodies by suppression subtractive hybridization.
NS1	YIPF6	286451	23697814	DENV2	HMEC-1	Suppression subtractive hybridization, qRT-PCR	Differentially expressed genes of human microvascular endothelial cells in response to anti-dengue virus NS1 antibodies by suppression subtractive hybridization.
NS1	GSK3B	2932	23851680	DENV2	HMEC-1	Immunofluorescence microscopy, Western blot	Anti-dengue virus nonstructural protein 1 antibodies cause NO-mediated endothelial cell apoptosis via ceramide-regulated glycogen synthase kinase-3β and NF-κB activation.
NS1	NFKB1	4790	23851680	DENV2	HMEC-1	Immunofluorescence microscopy, Western blot	Anti-dengue virus nonstructural protein 1 antibodies cause NO-mediated endothelial cell apoptosis via ceramide-regulated glycogen synthase kinase-3β and NF-κB activation.
NS1	NOS2	4843	23851680	DENV2	HMEC-1	Immunofluorescence microscopy, Western blot	Anti-dengue virus nonstructural protein 1 antibodies cause NO-mediated endothelial cell apoptosis via ceramide-regulated glycogen synthase kinase-3β and NF-κB activation.
NS1	RELA	5970	23851680	DENV2	HMEC-1	Immunofluorescence microscopy, Western blot	Anti-dengue virus nonstructural protein 1 antibodies cause NO-mediated endothelial cell apoptosis via ceramide-regulated glycogen synthase kinase-3β and NF-κB activation.
NS1	PDIA2	64714	25664880	DENV2	THP-1	Co-immunoprecipitation, Co-localization	Protein disulfide isomerase mediates dengue virus entry in association with lipid rafts.
NS1	ANKHD1	54882	26092250	DENV2	Huh7	Co-immunoprecipitation followed by Mass spectrometry	Dengue virus NS1 protein interacts with the ribosomal protein RPL18: This interaction is required for viraltranslation and replication in Huh-7 cells.
NS1	CFL1	1072	26092250	DENV2	Huh7	Co-immunoprecipitation followed by Mass spectrometry	Dengue virus NS1 protein interacts with the ribosomal protein RPL18: This interaction is required for viraltranslation and replication in Huh-7 cells.
NS1	CHEK1	1111	26092250	DENV2	Huh7	Co-immunoprecipitation followed by Mass spectrometry	Dengue virus NS1 protein interacts with the ribosomal protein RPL18: This interaction is required for viraltranslation and replication in Huh-7 cells.
NS1	DIRAS2	54769	26092250	DENV2	Huh7	Co-immunoprecipitation followed by Mass spectrometry	Dengue virus NS1 protein interacts with the ribosomal protein RPL18: This interaction is required for viraltranslation and replication in Huh-7 cells.
NS1	DYNC1H1	1778	26092250	DENV2	Huh7	Co-immunoprecipitation followed by Mass spectrometry	Dengue virus NS1 protein interacts with the ribosomal protein RPL18: This interaction is required for viraltranslation and replication in Huh-7 cells.
NS1	EEF1A1	1915	26092250	DENV2	Huh7	Co-immunoprecipitation followed by Mass spectrometry	Dengue virus NS1 protein interacts with the ribosomal protein RPL18: This interaction is required for viraltranslation and replication in Huh-7 cells.
NS1	FAM132A	388581	26092250	DENV2	Huh7	Co-immunoprecipitation followed by Mass spectrometry	Dengue virus NS1 protein interacts with the ribosomal protein RPL18: This interaction is required for viraltranslation and replication in Huh-7 cells.
NS1	GAPDH	2597	26092250	DENV2	Huh7	Co-immunoprecipitation followed by Mass spectrometry	Dengue virus NS1 protein interacts with the ribosomal protein RPL18: This interaction is required for viraltranslation and replication in Huh-7 cells.
NS1	GPI	2821	26092250	DENV2	Huh7	Co-immunoprecipitation followed by Mass spectrometry	Dengue virus NS1 protein interacts with the ribosomal protein RPL18: This interaction is required for viraltranslation and replication in Huh-7 cells.
NS1	H3F3C	440093	26092250	DENV2	Huh7	Co-immunoprecipitation followed by Mass spectrometry	Dengue virus NS1 protein interacts with the ribosomal protein RPL18: This interaction is required for viraltranslation and replication in Huh-7 cells.
NS1	HIST1H2BA	255626	26092250	DENV2	Huh7	Co-immunoprecipitation followed by Mass spectrometry	Dengue virus NS1 protein interacts with the ribosomal protein RPL18: This interaction is required for viraltranslation and replication in Huh-7 cells.
NS1	HIST1H2BB	3018	26092250	DENV2	Huh7	Co-immunoprecipitation followed by Mass spectrometry	Dengue virus NS1 protein interacts with the ribosomal protein RPL18: This interaction is required for viraltranslation and replication in Huh-7 cells.
NS1	HIST1H4H	8365	26092250	DENV2	Huh7	Co-immunoprecipitation followed by Mass spectrometry	Dengue virus NS1 protein interacts with the ribosomal protein RPL18: This interaction is required for viraltranslation and replication in Huh-7 cells.
NS1	HNRNPF	3185	26092250	DENV2	Huh7	Co-immunoprecipitation followed by Mass spectrometry	Dengue virus NS1 protein interacts with the ribosomal protein RPL18: This interaction is required for viraltranslation and replication in Huh-7 cells.
NS1	HSP90AB1	3326	26092250	DENV2	Huh7	Co-immunoprecipitation followed by Mass spectrometry	Dengue virus NS1 protein interacts with the ribosomal protein RPL18: This interaction is required for viraltranslation and replication in Huh-7 cells.
NS1	HSPA8	3312	26092250	DENV2	Huh7	Co-immunoprecipitation followed by Mass spectrometry	Dengue virus NS1 protein interacts with the ribosomal protein RPL18: This interaction is required for viraltranslation and replication in Huh-7 cells.
NS1	HSPB1	3315	26092250	DENV2	Huh7	Co-immunoprecipitation followed by Mass spectrometry	Dengue virus NS1 protein interacts with the ribosomal protein RPL18: This interaction is required for viraltranslation and replication in Huh-7 cells.
NS1	IGF2BP2	10644	26092250	DENV2	Huh7	Co-immunoprecipitation followed by Mass spectrometry	Dengue virus NS1 protein interacts with the ribosomal protein RPL18: This interaction is required for viraltranslation and replication in Huh-7 cells.
NS1	MRPS15	64960	26092250	DENV2	Huh7	Co-immunoprecipitation followed by Mass spectrometry	Dengue virus NS1 protein interacts with the ribosomal protein RPL18: This interaction is required for viraltranslation and replication in Huh-7 cells.
NS1	OXNAD1	92106	26092250	DENV2	Huh7	Co-immunoprecipitation followed by Mass spectrometry	Dengue virus NS1 protein interacts with the ribosomal protein RPL18: This interaction is required for viraltranslation and replication in Huh-7 cells.
NS1	PKM	5315	26092250	DENV2	Huh7	Co-immunoprecipitation followed by Mass spectrometry	Dengue virus NS1 protein interacts with the ribosomal protein RPL18: This interaction is required for viraltranslation and replication in Huh-7 cells.
NS1	PLEC	5339	26092250	DENV2	Huh7	Co-immunoprecipitation followed by Mass spectrometry	Dengue virus NS1 protein interacts with the ribosomal protein RPL18: This interaction is required for viraltranslation and replication in Huh-7 cells.
NS1	PRDX1	5052	26092250	DENV2	Huh7	Co-immunoprecipitation followed by Mass spectrometry	Dengue virus NS1 protein interacts with the ribosomal protein RPL18: This interaction is required for viraltranslation and replication in Huh-7 cells.
NS1	PSMC1	5700	26092250	DENV2	Huh7	Co-immunoprecipitation followed by Mass spectrometry	Dengue virus NS1 protein interacts with the ribosomal protein RPL18: This interaction is required for viraltranslation and replication in Huh-7 cells.
NS1	RPL11	6135	26092250	DENV2	Huh7	Co-immunoprecipitation followed by Mass spectrometry	Dengue virus NS1 protein interacts with the ribosomal protein RPL18: This interaction is required for viraltranslation and replication in Huh-7 cells.
NS1	RPL13	6137	26092250	DENV2	Huh7	Co-immunoprecipitation followed by Mass spectrometry	Dengue virus NS1 protein interacts with the ribosomal protein RPL18: This interaction is required for viraltranslation and replication in Huh-7 cells.
NS1	RPL14	9045	26092250	DENV2	Huh7	Co-immunoprecipitation followed by Mass spectrometry	Dengue virus NS1 protein interacts with the ribosomal protein RPL18: This interaction is required for viraltranslation and replication in Huh-7 cells.
NS1	RPL17	6139	26092250	DENV2	Huh7	Co-immunoprecipitation followed by Mass spectrometry	Dengue virus NS1 protein interacts with the ribosomal protein RPL18: This interaction is required for viraltranslation and replication in Huh-7 cells.
NS1	RPL18	6141	26092250	DENV2	Huh7	Co-immunoprecipitation followed by Mass spectrometry	Dengue virus NS1 protein interacts with the ribosomal protein RPL18: This interaction is required for viraltranslation and replication in Huh-7 cells.
NS1	RPL18A	6142	26092250	DENV2	Huh7	Co-immunoprecipitation followed by Mass spectrometry	Dengue virus NS1 protein interacts with the ribosomal protein RPL18: This interaction is required for viraltranslation and replication in Huh-7 cells.
NS1	RPL19	6143	26092250	DENV2	Huh7	Co-immunoprecipitation followed by Mass spectrometry	Dengue virus NS1 protein interacts with the ribosomal protein RPL18: This interaction is required for viraltranslation and replication in Huh-7 cells.
NS1	RPL21	6144	26092250	DENV2	Huh7	Co-immunoprecipitation followed by Mass spectrometry	Dengue virus NS1 protein interacts with the ribosomal protein RPL18: This interaction is required for viraltranslation and replication in Huh-7 cells.
NS1	RPL23A	6147	26092250	DENV2	Huh7	Co-immunoprecipitation followed by Mass spectrometry	Dengue virus NS1 protein interacts with the ribosomal protein RPL18: This interaction is required for viraltranslation and replication in Huh-7 cells.
NS1	RPL24	6152	26092250	DENV2	Huh7	Co-immunoprecipitation followed by Mass spectrometry	Dengue virus NS1 protein interacts with the ribosomal protein RPL18: This interaction is required for viraltranslation and replication in Huh-7 cells.
NS1	RPL26	6154	26092250	DENV2	Huh7	Co-immunoprecipitation followed by Mass spectrometry	Dengue virus NS1 protein interacts with the ribosomal protein RPL18: This interaction is required for viraltranslation and replication in Huh-7 cells.
NS1	RPL27A	6157	26092250	DENV2	Huh7	Co-immunoprecipitation followed by Mass spectrometry	Dengue virus NS1 protein interacts with the ribosomal protein RPL18: This interaction is required for viraltranslation and replication in Huh-7 cells.
NS1	RPL31	6160	26092250	DENV2	Huh7	Co-immunoprecipitation followed by Mass spectrometry	Dengue virus NS1 protein interacts with the ribosomal protein RPL18: This interaction is required for viraltranslation and replication in Huh-7 cells.
NS1	RPL36	25873	26092250	DENV2	Huh7	Co-immunoprecipitation followed by Mass spectrometry	Dengue virus NS1 protein interacts with the ribosomal protein RPL18: This interaction is required for viraltranslation and replication in Huh-7 cells.
NS1	RPL7	6129	26092250	DENV2	Huh7	Co-immunoprecipitation followed by Mass spectrometry	Dengue virus NS1 protein interacts with the ribosomal protein RPL18: This interaction is required for viraltranslation and replication in Huh-7 cells.
NS1	RPS13	6207	26092250	DENV2	Huh7	Co-immunoprecipitation followed by Mass spectrometry	Dengue virus NS1 protein interacts with the ribosomal protein RPL18: This interaction is required for viraltranslation and replication in Huh-7 cells.
NS1	RPS14	6208	26092250	DENV2	Huh7	Co-immunoprecipitation followed by Mass spectrometry	Dengue virus NS1 protein interacts with the ribosomal protein RPL18: This interaction is required for viraltranslation and replication in Huh-7 cells.
NS1	RPS15	6209	26092250	DENV2	Huh7	Co-immunoprecipitation followed by Mass spectrometry	Dengue virus NS1 protein interacts with the ribosomal protein RPL18: This interaction is required for viraltranslation and replication in Huh-7 cells.
NS1	RPS15A	6210	26092250	DENV2	Huh7	Co-immunoprecipitation followed by Mass spectrometry	Dengue virus NS1 protein interacts with the ribosomal protein RPL18: This interaction is required for viraltranslation and replication in Huh-7 cells.
NS1	RPS16	6217	26092250	DENV2	Huh7	Co-immunoprecipitation followed by Mass spectrometry	Dengue virus NS1 protein interacts with the ribosomal protein RPL18: This interaction is required for viraltranslation and replication in Huh-7 cells.
NS1	RPS18	6222	26092250	DENV2	Huh7	Co-immunoprecipitation followed by Mass spectrometry	Dengue virus NS1 protein interacts with the ribosomal protein RPL18: This interaction is required for viraltranslation and replication in Huh-7 cells.
NS1	RPS2	6187	26092250	DENV2	Huh7	Co-immunoprecipitation followed by Mass spectrometry	Dengue virus NS1 protein interacts with the ribosomal protein RPL18: This interaction is required for viraltranslation and replication in Huh-7 cells.
NS1	RPS23	6228	26092250	DENV2	Huh7	Co-immunoprecipitation followed by Mass spectrometry	Dengue virus NS1 protein interacts with the ribosomal protein RPL18: This interaction is required for viraltranslation and replication in Huh-7 cells.
NS1	RPS24	6229	26092250	DENV2	Huh7	Co-immunoprecipitation followed by Mass spectrometry	Dengue virus NS1 protein interacts with the ribosomal protein RPL18: This interaction is required for viraltranslation and replication in Huh-7 cells.
NS1	RPS25	6230	26092250	DENV2	Huh7	Co-immunoprecipitation followed by Mass spectrometry	Dengue virus NS1 protein interacts with the ribosomal protein RPL18: This interaction is required for viraltranslation and replication in Huh-7 cells.
NS1	RPS3A	6189	26092250	DENV2	Huh7	Co-immunoprecipitation followed by Mass spectrometry	Dengue virus NS1 protein interacts with the ribosomal protein RPL18: This interaction is required for viraltranslation and replication in Huh-7 cells.
NS1	RPS4X	6191	26092250	DENV2	Huh7	Co-immunoprecipitation followed by Mass spectrometry	Dengue virus NS1 protein interacts with the ribosomal protein RPL18: This interaction is required for viraltranslation and replication in Huh-7 cells.
NS1	RPS5	6193	26092250	DENV2	Huh7	Co-immunoprecipitation followed by Mass spectrometry	Dengue virus NS1 protein interacts with the ribosomal protein RPL18: This interaction is required for viraltranslation and replication in Huh-7 cells.
NS1	RPS6	6194	26092250	DENV2	Huh7	Co-immunoprecipitation followed by Mass spectrometry	Dengue virus NS1 protein interacts with the ribosomal protein RPL18: This interaction is required for viraltranslation and replication in Huh-7 cells.
NS1	RPS8	6202	26092250	DENV2	Huh7	Co-immunoprecipitation followed by Mass spectrometry	Dengue virus NS1 protein interacts with the ribosomal protein RPL18: This interaction is required for viraltranslation and replication in Huh-7 cells.
NS1	SIK3	23387	26092250	DENV2	Huh7	Co-immunoprecipitation followed by Mass spectrometry	Dengue virus NS1 protein interacts with the ribosomal protein RPL18: This interaction is required for viraltranslation and replication in Huh-7 cells.
NS1	TTC21B	79809	26092250	DENV2	Huh7	Co-immunoprecipitation followed by Mass spectrometry	Dengue virus NS1 protein interacts with the ribosomal protein RPL18: This interaction is required for viraltranslation and replication in Huh-7 cells.
NS1	TUBA1A	7846	26092250	DENV2	Huh7	Co-immunoprecipitation followed by Mass spectrometry	Dengue virus NS1 protein interacts with the ribosomal protein RPL18: This interaction is required for viraltranslation and replication in Huh-7 cells.
NS1	TUBA4A	7277	26092250	DENV2	Huh7	Co-immunoprecipitation followed by Mass spectrometry	Dengue virus NS1 protein interacts with the ribosomal protein RPL18: This interaction is required for viraltranslation and replication in Huh-7 cells.
NS1	TUBB	203068	26092250	DENV2	Huh7	Co-immunoprecipitation followed by Mass spectrometry	Dengue virus NS1 protein interacts with the ribosomal protein RPL18: This interaction is required for viraltranslation and replication in Huh-7 cells.
NS1	TUBB2A	7280	26092250	DENV2	Huh7	Co-immunoprecipitation followed by Mass spectrometry	Dengue virus NS1 protein interacts with the ribosomal protein RPL18: This interaction is required for viraltranslation and replication in Huh-7 cells.
NS1	TUBB4B	10383	26092250	DENV2	Huh7	Co-immunoprecipitation followed by Mass spectrometry	Dengue virus NS1 protein interacts with the ribosomal protein RPL18: This interaction is required for viraltranslation and replication in Huh-7 cells.
NS1	TUBB6	84617	26092250	DENV2	Huh7	Co-immunoprecipitation followed by Mass spectrometry	Dengue virus NS1 protein interacts with the ribosomal protein RPL18: This interaction is required for viraltranslation and replication in Huh-7 cells.
NS1	VIM	7431	26092250	DENV2	Huh7	Co-immunoprecipitation followed by Mass spectrometry	Dengue virus NS1 protein interacts with the ribosomal protein RPL18: This interaction is required for viraltranslation and replication in Huh-7 cells.
NS1	TLR2	7097	26226614	DENV2	Human PBMC	Western blot, FACS, Immunofluorescence microscopy	Activation of TLR2 and TLR6 by Dengue NS1 Protein and Its Implications in the Immunopathogenesis of Dengue Virus Infection.
NS1	TLR6	10333	26226614	DENV2	Human PBMC	Western blot, FACS, Immunofluorescence microscopy	Activation of TLR2 and TLR6 by Dengue NS1 Protein and Its Implications in the Immunopathogenesis of Dengue Virus Infection.
NS1	TLR4	7099	26355031		PBMCs	Inhibition assay	Dengue virus NS1 protein activates cells via Toll-like receptor 4 and disrupts endothelial cell monolayer integrity.
NS2A	AFTPH	54812	21358811	DENV2	insilico	Computational analysis	Mapping protein interactions between Dengue virus and its human and insect hosts.
NS2A	AP1M1	8907	21358811	DENV2	insilico	Computational analysis	Mapping protein interactions between Dengue virus and its human and insect hosts.
NS2A	CLK1	1195	21358811	DENV2	insilico	Computational analysis	Mapping protein interactions between Dengue virus and its human and insect hosts.
NS2A	COIL	8161	21358811	DENV2	insilico	Computational analysis	Mapping protein interactions between Dengue virus and its human and insect hosts.
NS2A	CSNK2A1	1457	21358811	DENV2	insilico	Computational analysis	Mapping protein interactions between Dengue virus and its human and insect hosts.
NS2A	DHX15	1665	21358811	DENV2	insilico	Computational analysis	Mapping protein interactions between Dengue virus and its human and insect hosts.
NS2A	KIF17	57576	21358811	DENV2	insilico	Computational analysis	Mapping protein interactions between Dengue virus and its human and insect hosts.
NS2A	NUMBL	9253	21358811	DENV2	insilico	Computational analysis	Mapping protein interactions between Dengue virus and its human and insect hosts.
NS2A	TAZ	6901	21358811	DENV2	insilico	Computational analysis	Mapping protein interactions between Dengue virus and its human and insect hosts.
NS2A	UBE2I	7329	21358811	DENV2	insilico	Computational analysis	Mapping protein interactions between Dengue virus and its human and insect hosts.
NS2A	AKAP1	8165	21911577	DENV2	Yeast	Y2H assay	A physical interaction network of dengue virus and human proteins.
NS2A	AKR7A3	22977	21911577	DENV2	Yeast	Y2H assay	A physical interaction network of dengue virus and human proteins.
NS2A	AMER1	139285	21911577	DENV2	Yeast	Y2H assay	A physical interaction network of dengue virus and human proteins.
NS2A	APOA1	335	21911577	DENV2	Yeast	Y2H assay	A physical interaction network of dengue virus and human proteins.
NS2A	APOB	338	21911577	DENV2	Yeast	Y2H assay	A physical interaction network of dengue virus and human proteins.
NS2A	BMS1	9790	21911577	DENV2	Yeast	Y2H assay	A physical interaction network of dengue virus and human proteins.
NS2A	C4A	720	21911577	DENV2	Yeast	Y2H assay	A physical interaction network of dengue virus and human proteins.
NS2A	CCDC66	285331	21911577	DENV2	Yeast	Y2H assay	A physical interaction network of dengue virus and human proteins.
NS2A	CCDC88C	440193	21911577	DENV2	Yeast	Y2H assay	A physical interaction network of dengue virus and human proteins.
NS2A	CNOT1	23019	21911577	DENV2	Yeast	Y2H assay	A physical interaction network of dengue virus and human proteins.
NS2A	COPS2	9318	21911577	DENV2	Yeast	Y2H assay	A physical interaction network of dengue virus and human proteins.
NS2A	CTNNB1	1499	21911577	DENV2	Yeast	Y2H assay	A physical interaction network of dengue virus and human proteins.
NS2A	DCTN1	1639	21911577	DENV2	Yeast	Y2H assay	A physical interaction network of dengue virus and human proteins.
NS2A	DDX5	1655	21911577	DENV2	Yeast	Y2H assay	A physical interaction network of dengue virus and human proteins.
NS2A	DSCR3	10311	21911577	DENV2	Yeast	Y2H assay	A physical interaction network of dengue virus and human proteins.
NS2A	DST	667	21911577	DENV2	Yeast	Y2H assay	A physical interaction network of dengue virus and human proteins.
NS2A	FGA	2243	21911577	DENV2	Yeast	Y2H assay	A physical interaction network of dengue virus and human proteins.
NS2A	GC	2638	21911577	DENV2	Yeast	Y2H assay	A physical interaction network of dengue virus and human proteins.
NS2A	KIF1B	23095	21911577	DENV2	Yeast	Y2H assay	A physical interaction network of dengue virus and human proteins.
NS2A	MYH14	79784	21911577	DENV2	Yeast	Y2H assay	A physical interaction network of dengue virus and human proteins.
NS2A	PSMD1	5707	21911577	DENV2	Yeast	Y2H assay	A physical interaction network of dengue virus and human proteins.
NS2A	SCLT1	132320	21911577	DENV2	Yeast	Y2H assay	A physical interaction network of dengue virus and human proteins.
NS2A	SEC31A	22872	21911577	DENV2	Yeast	Y2H assay	A physical interaction network of dengue virus and human proteins.
NS2A	SPG7	6687	21911577	DENV2	Yeast	Y2H assay	A physical interaction network of dengue virus and human proteins.
NS2A	SRSF11	9295	21911577	DENV2	Yeast	Y2H assay	A physical interaction network of dengue virus and human proteins.
NS2A	SYBU	55638	21911577	DENV2	Yeast	Y2H assay	A physical interaction network of dengue virus and human proteins.
NS2A	SYNE2	23224	21911577	DENV2	Yeast	Y2H assay	A physical interaction network of dengue virus and human proteins.
NS2A	TNFRSF10B	8795	21911577	DENV2	Yeast	Y2H assay	A physical interaction network of dengue virus and human proteins.
NS2A	DDX58	23586	25968648	DENV1, DENV2, DENV4	293T	Luciferase reporter assays, Western blot	Dengue Virus NS Proteins Inhibit RIG-I/MAVS Signaling by Blocking TBK1/IRF3 Phosphorylation: Dengue Virus Serotype 1 NS4A Is a Unique Interferon-Regulating Virulence Determinant
NS2A	IFIH1	64135	25968648	DENV1, DENV2, DENV4	293T	Luciferase reporter assays, Western blot	Dengue Virus NS Proteins Inhibit RIG-I/MAVS Signaling by Blocking TBK1/IRF3 Phosphorylation: Dengue Virus Serotype 1 NS4A Is a Unique Interferon-Regulating Virulence Determinant
NS2A	IKBKE	9641	25968648	DENV1, DENV2, DENV4	293T	Luciferase reporter assays, Western blot	Dengue Virus NS Proteins Inhibit RIG-I/MAVS Signaling by Blocking TBK1/IRF3 Phosphorylation: Dengue Virus Serotype 1 NS4A Is a Unique Interferon-Regulating Virulence Determinant
NS2A	MAVS	57506	25968648	DENV1, DENV2, DENV4	293T	Luciferase reporter assays, Western blot	Dengue Virus NS Proteins Inhibit RIG-I/MAVS Signaling by Blocking TBK1/IRF3 Phosphorylation: Dengue Virus Serotype 1 NS4A Is a Unique Interferon-Regulating Virulence Determinant
NS2A	TBK1	29110	25968648	DENV1, DENV2, DENV4	293T	Luciferase reporter assays, Western blot	Dengue Virus NS Proteins Inhibit RIG-I/MAVS Signaling by Blocking TBK1/IRF3 Phosphorylation: Dengue Virus Serotype 1 NS4A Is a Unique Interferon-Regulating Virulence Determinant
NS2B	AGGF1	55109	21911577	DENV2	Yeast	Y2H assay	A physical interaction network of dengue virus and human proteins.
NS2B	AMER1	139285	21911577	DENV2	Yeast	Y2H assay	A physical interaction network of dengue virus and human proteins.
NS2B	COL12A1	1303	21911577	DENV2	Yeast	Y2H assay	A physical interaction network of dengue virus and human proteins.
NS2B	DDX5	1655	21911577	DENV2	Yeast	Y2H assay	A physical interaction network of dengue virus and human proteins.
NS2B	DST	667	21911577	DENV2	Yeast	Y2H assay	A physical interaction network of dengue virus and human proteins.
NS2B	ECI2	10455	21911577	DENV2	Yeast	Y2H assay	A physical interaction network of dengue virus and human proteins.
NS2B	FN1	2335	21911577	DENV2	Yeast	Y2H assay	A physical interaction network of dengue virus and human proteins.
NS2B	FYB	2533	21911577	DENV2	Yeast	Y2H assay	A physical interaction network of dengue virus and human proteins.
NS2B	KNG1	3827	21911577	DENV2	Yeast	Y2H assay	A physical interaction network of dengue virus and human proteins.
NS2B	KPNA3	3839	21911577	DENV2	Yeast	Y2H assay	A physical interaction network of dengue virus and human proteins.
NS2B	NID1	4811	21911577	DENV2	Yeast	Y2H assay	A physical interaction network of dengue virus and human proteins.
NS2B	NUP50	10762	21911577	DENV2	Yeast	Y2H assay	A physical interaction network of dengue virus and human proteins.
NS2B	PAIP1	10605	21911577	DENV2	Yeast	Y2H assay	A physical interaction network of dengue virus and human proteins.
NS2B	PIAS1	8554	21911577	DENV2	Yeast	Y2H assay	A physical interaction network of dengue virus and human proteins.
NS2B	SERPIND1	3053	21911577	DENV2	Yeast	Y2H assay	A physical interaction network of dengue virus and human proteins.
NS2B	TAB2	23118	21911577	DENV2	Yeast	Y2H assay	A physical interaction network of dengue virus and human proteins.
NS2B	UBE2I	7329	21911577	DENV2	Yeast	Y2H assay	A physical interaction network of dengue virus and human proteins.
NS2B	UBXN2A	165324	21911577	DENV2	Yeast	Y2H assay	A physical interaction network of dengue virus and human proteins.
NS2B	WWC1	23286	21911577	DENV2	Yeast	Y2H assay	A physical interaction network of dengue virus and human proteins.
NS2B	ZNF688	146542	21911577	DENV2	Yeast	Y2H assay	A physical interaction network of dengue virus and human proteins.
NS2B	IRF3	3661	22761576	DENV2	293T/17, A549	Immunofluorescence microscopy, Western blot	Dengue virus targets the adaptor protein MITA to subvert host innate immunity.
NS2B	TMEM173	340061	22761576	DENV2	293T/17, A549	RT-qPCR, Co-immunoprecipitation	Dengue virus targets the adaptor protein MITA to subvert host innate immunity.
NS2B	TMEM173	340061	23055924	DENV2	Vero, 293T, MEF, Monocyte-derived dendritic cells (MDDCs), Monocyte derived macrophages (MDMs)	siRNA	DENV inhibits type I IFN production in infected cells by cleaving human STING.
NS2B	IKBKE	9641	24173023	DENV2	293	Co-immunoprecipitation, Co-localization by Immunofluorescence staining, Computational analysis	Dengue virus subverts the interferon induction pathway via NS2B/3 protease-I?B kinase epsilon interaction.
NS3	SSB	6741	15084396	DENV4	U937	UV-induced cross-linking assay	La protein binds to NS5 and NS3 and to the 5' and 3' ends of Dengue 4 virus RNA.
NS3	NRBP1	29959	15084397	DENV2	BHK-21	Y2H assay, Co-immunoprecipitation analysis, Co-localization analysis	The non-structural 3 (NS3) protein of dengue virus type 2 interacts with human nuclear receptor binding protein and is associated with alterations in membrane structure.
NS3	TIA1	7072	17502609	DENV2	BHK-21	Co-immunoprecipitation, Western blot, Co-localization by Confocal Microscopy	Interaction of TIA-1/TIAR with West Nile and dengue virus products in infected cells interferes with stress granule formation and processing body assembly
NS3	TIAL1	7073	17502609	DENV2	BHK-21	Co-immunoprecipitation, Western blot, Co-localization by Confocal Microscopy	Interaction of TIA-1/TIAR with West Nile and dengue virus products in infected cells interferes with stress granule formation and processing body assembly
NS3	PTB	5725	19692542	DENV2	Vero, Huh7	Immunofluorescence microscopy, siRNA	Polypyrimidine tract-binding protein is relocated to the cytoplasm and is required during dengue virus infection in Vero cells.
NS3	FASN	2194	20855599	DENV2	Huh-7.5, 293T	siRNA, Immunofluorescence Analysis, Y2H assay,	Dengue virus nonstructural protein 3 redistributes fatty acid synthase to sites of viral replication and increases cellular fatty acid synthesis.
NS3	CHML	1122	21358811	DENV2	insilico	Computational analysis	Mapping protein interactions between Dengue virus and its human and insect hosts.
NS3	CSNK2A1	1457	21358811	DENV2	insilico	Computational analysis	Mapping protein interactions between Dengue virus and its human and insect hosts.
NS3	EXOSC9	5393	21358811	DENV2	insilico	Computational analysis	Mapping protein interactions between Dengue virus and its human and insect hosts.
NS3	MBL2	4153	21358811	DENV2	insilico	Computational analysis	Mapping protein interactions between Dengue virus and its human and insect hosts.
NS3	PIAS2	9063	21358811	DENV2	insilico	Computational analysis	Mapping protein interactions between Dengue virus and its human and insect hosts.
NS3	UBE2I	7329	21358811	DENV2	insilico	Computational analysis	Mapping protein interactions between Dengue virus and its human and insect hosts.
NS3	AKAP8L	26993	21911577	DENV2	Yeast	Y2H assay	A physical interaction network of dengue virus and human proteins.
NS3	ANKRD50	57182	21911577	DENV2	Yeast	Y2H assay	A physical interaction network of dengue virus and human proteins.
NS3	DCTN2	10540	21911577	DENV2	Yeast	Y2H assay	A physical interaction network of dengue virus and human proteins.
NS3	DDX5	1655	21911577	DENV2	Yeast	Y2H assay	A physical interaction network of dengue virus and human proteins.
NS3	EIF4G2	1982	21911577	DENV2	Yeast	Y2H assay	A physical interaction network of dengue virus and human proteins.
NS3	EMILIN1	11117	21911577	DENV2	Yeast	Y2H assay	A physical interaction network of dengue virus and human proteins.
NS3	FGB	2244	21911577	DENV2	Yeast	Y2H assay	A physical interaction network of dengue virus and human proteins.
NS3	GOLGB1	2804	21911577	DENV2	Yeast	Y2H assay	A physical interaction network of dengue virus and human proteins.
NS3	KIF1B	23095	21911577	DENV2	Yeast	Y2H assay	A physical interaction network of dengue virus and human proteins.
NS3	KTN1	3895	21911577	DENV2	Yeast	Y2H assay	A physical interaction network of dengue virus and human proteins.
NS3	LOC642846	642846	21911577	DENV2	Yeast	Y2H assay	A physical interaction network of dengue virus and human proteins.
NS3	MYCBP2	23077	21911577	DENV2	Yeast	Y2H assay	A physical interaction network of dengue virus and human proteins.
NS3	PCM1	5108	21911577	DENV2	Yeast	Y2H assay	A physical interaction network of dengue virus and human proteins.
NS3	PDCD6IP	10015	21911577	DENV2	Yeast	Y2H assay	A physical interaction network of dengue virus and human proteins.
NS3	PRDX6	9588	21911577	DENV2	Yeast	Y2H assay	A physical interaction network of dengue virus and human proteins.
NS3	PTBP1	5725	21911577	DENV2	Yeast	Y2H assay	A physical interaction network of dengue virus and human proteins.
NS3	RAI14	26064	21911577	DENV2	Yeast	Y2H assay	A physical interaction network of dengue virus and human proteins.
NS3	SERPIND1	3053	21911577	DENV2	Yeast	Y2H assay	A physical interaction network of dengue virus and human proteins.
NS3	SRFBP1	153443	21911577	DENV2	Yeast	Y2H assay	A physical interaction network of dengue virus and human proteins.
NS3	TCF7L2	6934	21911577	DENV2	Yeast	Y2H assay	A physical interaction network of dengue virus and human proteins.
NS3	TRIP11	9321	21911577	DENV2	Yeast	Y2H assay	A physical interaction network of dengue virus and human proteins.
NS3	UACA	55075	21911577	DENV2	Yeast	Y2H assay	A physical interaction network of dengue virus and human proteins.
NS3	ZBTB8OS	339487	21911577	DENV2	Yeast	Y2H assay	A physical interaction network of dengue virus and human proteins.
NS3	ACTA2	59	22014111	DENV1	Yeast, 293	Y2H assay, Co-immunoprecipitation	Flavivirus NS3 and NS5 proteins interaction network: a high-throughput yeast two-hybrid screen.
NS3	ACTB	60	22014111	DENV1	Yeast, 293	Y2H assay, Co-immunoprecipitation	Flavivirus NS3 and NS5 proteins interaction network: a high-throughput yeast two-hybrid screen.
NS3	ACTG1	71	22014111	DENV1	Yeast, 293	Y2H assay, Co-immunoprecipitation	Flavivirus NS3 and NS5 proteins interaction network: a high-throughput yeast two-hybrid screen.
NS3	ACTG2	72	22014111	DENV1	Yeast, 293	Y2H assay, Co-immunoprecipitation	Flavivirus NS3 and NS5 proteins interaction network: a high-throughput yeast two-hybrid screen.
NS3	APBB1IP	54518	22014111	DENV1	Yeast, 293	Y2H assay, Co-immunoprecipitation	Flavivirus NS3 and NS5 proteins interaction network: a high-throughput yeast two-hybrid screen.
NS3	AXIN1	8312	22014111	DENV1	Yeast, 293	Y2H assay, Co-immunoprecipitation	Flavivirus NS3 and NS5 proteins interaction network: a high-throughput yeast two-hybrid screen.
NS3	AZI2	64343	22014111	DENV1	Yeast, 293	Y2H assay, Co-immunoprecipitation	Flavivirus NS3 and NS5 proteins interaction network: a high-throughput yeast two-hybrid screen.
NS3	BCL2L14	79370	22014111	DENV1	Yeast, 293	Y2H assay, Co-immunoprecipitation	Flavivirus NS3 and NS5 proteins interaction network: a high-throughput yeast two-hybrid screen.
NS3	CAMK2B	816	22014111	DENV1	Yeast, 293	Y2H assay, Co-immunoprecipitation	Flavivirus NS3 and NS5 proteins interaction network: a high-throughput yeast two-hybrid screen.
NS3	CEP250	11190	22014111	DENV1	Yeast, 293	Y2H assay, Co-immunoprecipitation	Flavivirus NS3 and NS5 proteins interaction network: a high-throughput yeast two-hybrid screen.
NS3	CEP63	80254	22014111	DENV1	Yeast, 293	Y2H assay, Co-immunoprecipitation	Flavivirus NS3 and NS5 proteins interaction network: a high-throughput yeast two-hybrid screen.
NS3	ENO1	2023	22014111	DENV1	Yeast, 293	Y2H assay, Co-immunoprecipitation	Flavivirus NS3 and NS5 proteins interaction network: a high-throughput yeast two-hybrid screen.
NS3	ENOX2	10495	22014111	DENV1	Yeast, 293	Y2H assay, Co-immunoprecipitation	Flavivirus NS3 and NS5 proteins interaction network: a high-throughput yeast two-hybrid screen.
NS3	FAM184A	79632	22014111	DENV1	Yeast, 293	Y2H assay, Co-immunoprecipitation	Flavivirus NS3 and NS5 proteins interaction network: a high-throughput yeast two-hybrid screen.
NS3	GGA1	26088	22014111	DENV1	Yeast, 293	Y2H assay, Co-immunoprecipitation	Flavivirus NS3 and NS5 proteins interaction network: a high-throughput yeast two-hybrid screen.
NS3	ILF3	3609	22014111	DENV1	Yeast, 293	Y2H assay, Co-immunoprecipitation	Flavivirus NS3 and NS5 proteins interaction network: a high-throughput yeast two-hybrid screen.
NS3	LMNA	4000	22014111	DENV1	Yeast, 293	Y2H assay, Co-immunoprecipitation	Flavivirus NS3 and NS5 proteins interaction network: a high-throughput yeast two-hybrid screen.
NS3	NECAB2	54550	22014111	DENV1	Yeast, 293	Y2H assay, Co-immunoprecipitation	Flavivirus NS3 and NS5 proteins interaction network: a high-throughput yeast two-hybrid screen.
NS3	NFKBIA	4792	22014111	DENV1	Yeast, 293	Y2H assay, Co-immunoprecipitation	Flavivirus NS3 and NS5 proteins interaction network: a high-throughput yeast two-hybrid screen.
NS3	NME3	4832	22014111	DENV1	Yeast, 293	Y2H assay, Co-immunoprecipitation	Flavivirus NS3 and NS5 proteins interaction network: a high-throughput yeast two-hybrid screen.
NS3	NRBP1	29959	22014111	DENV1	Yeast, 293	Y2H assay, Co-immunoprecipitation	Flavivirus NS3 and NS5 proteins interaction network: a high-throughput yeast two-hybrid screen.
NS3	PABPC1	26986	22014111	DENV1	Yeast, 293	Y2H assay, Co-immunoprecipitation	Flavivirus NS3 and NS5 proteins interaction network: a high-throughput yeast two-hybrid screen.
NS3	PHLDB3	653583	22014111	DENV1	Yeast, 293	Y2H assay, Co-immunoprecipitation	Flavivirus NS3 and NS5 proteins interaction network: a high-throughput yeast two-hybrid screen.
NS3	PLS3	5358	22014111	DENV1	Yeast, 293	Y2H assay, Co-immunoprecipitation	Flavivirus NS3 and NS5 proteins interaction network: a high-throughput yeast two-hybrid screen.
NS3	PRKRA	8575	22014111	DENV1	Yeast, 293	Y2H assay, Co-immunoprecipitation	Flavivirus NS3 and NS5 proteins interaction network: a high-throughput yeast two-hybrid screen.
NS3	PRMT5	10419	22014111	DENV1	Yeast, 293	Y2H assay, Co-immunoprecipitation	Flavivirus NS3 and NS5 proteins interaction network: a high-throughput yeast two-hybrid screen.
NS3	SCMH1	22955	22014111	DENV1	Yeast, 293	Y2H assay, Co-immunoprecipitation	Flavivirus NS3 and NS5 proteins interaction network: a high-throughput yeast two-hybrid screen.
NS3	SSB	6741	22014111	DENV1	Yeast, 293	Y2H assay, Co-immunoprecipitation	Flavivirus NS3 and NS5 proteins interaction network: a high-throughput yeast two-hybrid screen.
NS3	TNIP1	10318	22014111	DENV1	Yeast, 293	Y2H assay, Co-immunoprecipitation	Flavivirus NS3 and NS5 proteins interaction network: a high-throughput yeast two-hybrid screen.
NS3	TRAF4	9618	22014111	DENV1	Yeast, 293	Y2H assay, Co-immunoprecipitation	Flavivirus NS3 and NS5 proteins interaction network: a high-throughput yeast two-hybrid screen.
NS3	TRAFD1	10906	22014111	DENV1	Yeast, 293	Y2H assay, Co-immunoprecipitation	Flavivirus NS3 and NS5 proteins interaction network: a high-throughput yeast two-hybrid screen.
NS3	IRF3	3661	22761576	DENV2	293T/17, A549	Immunofluorescence microscopy, Western blot	Dengue virus targets the adaptor protein MITA to subvert host innate immunity.
NS3	TMEM173	340061	22761576	DENV2	293T/17, A549	RT-qPCR, Co-immunoprecipitation	Dengue virus targets the adaptor protein MITA to subvert host innate immunity.
NS3	TMEM173	340061	23055924	DENV2	Vero, 293T, MEF, Monocyte-derived dendritic cells (MDDCs), Monocyte derived macrophages (MDMs)	siRNA	DENV inhibits type I IFN production in infected cells by cleaving human STING.
NS3	ANP32B	10541	23326450	DENV1, DENV2, DENV3, DENV4	Yeast	Y2H assay	Identification of new protein interactions between dengue fever virus and its hosts, human and mosquito.
NS3	CALCOCO2	10241	23326450	DENV1, DENV2, DENV3, DENV4	Yeast	Y2H assay	Identification of new protein interactions between dengue fever virus and its hosts, human and mosquito.
NS3	CORO1A	11151	23326450	DENV1, DENV2, DENV3, DENV4	Yeast	Y2H assay	Identification of new protein interactions between dengue fever virus and its hosts, human and mosquito.
NS3	DNTTIP2	30836	23326450	DENV1, DENV2, DENV3, DENV4	Yeast	Y2H assay	Identification of new protein interactions between dengue fever virus and its hosts, human and mosquito.
NS3	GOLGB1	2804	23326450	DENV1, DENV2, DENV3, DENV4	Yeast	Y2H assay	Identification of new protein interactions between dengue fever virus and its hosts, human and mosquito.
NS3	HBB	3043	23326450	DENV1, DENV2, DENV3, DENV4	Yeast	Y2H assay	Identification of new protein interactions between dengue fever virus and its hosts, human and mosquito.
NS3	HSP90AB1	3326	23326450	DENV1, DENV2, DENV3, DENV4	Yeast	Y2H assay	Identification of new protein interactions between dengue fever virus and its hosts, human and mosquito.
NS3	LRRFIP1	9208	23326450	DENV1, DENV2, DENV3, DENV4	Yeast	Y2H assay	Identification of new protein interactions between dengue fever virus and its hosts, human and mosquito.
NS3	MTF1	4520	23326450	DENV1, DENV2, DENV3, DENV4	Yeast	Y2H assay	Identification of new protein interactions between dengue fever virus and its hosts, human and mosquito.
NS3	NFKBIA	4792	23326450	DENV1, DENV2, DENV3, DENV4	Yeast	Y2H assay	Identification of new protein interactions between dengue fever virus and its hosts, human and mosquito.
NS3	NRBP1	29959	23326450	DENV1, DENV2, DENV3, DENV4	Yeast	Y2H assay	Identification of new protein interactions between dengue fever virus and its hosts, human and mosquito.
NS3	OS9	10956	23326450	DENV1, DENV2, DENV3, DENV4	Yeast	Y2H assay	Identification of new protein interactions between dengue fever virus and its hosts, human and mosquito.
NS3	RILPL2	196383	23326450	DENV1, DENV2, DENV3, DENV4	Yeast	Y2H assay	Identification of new protein interactions between dengue fever virus and its hosts, human and mosquito.
NS3	RPL24	6152	23326450	DENV1, DENV2, DENV3, DENV4	Yeast	Y2H assay	Identification of new protein interactions between dengue fever virus and its hosts, human and mosquito.
NS3	ZNF410	57862	23326450	DENV1, DENV2, DENV3, DENV4	Yeast	Y2H assay	Identification of new protein interactions between dengue fever virus and its hosts, human and mosquito.
NS3	RSAD2	91543	23638199	DENV2	Vero, A549, Huh7, Huh7.5 and MDM	Co-localization, Co-immunoprecipitation, FRET analysis	Viperin is induced following dengue virus type-2 (DENV-2) infection and has anti-viral actions requiring the C-terminal end of viperin.
NS3	IKBKE	9641	24173023	DENV2	293	Co-immunoprecipitation, Co-localization by Immunofluorescence staining, Computational analysis	Dengue virus subverts the interferon induction pathway via NS2B/3 protease-I?B kinase epsilon interaction.
NS3	CAV1	857	24643062	DENV2	HMEC-1	Co-localization by immunofluorescence microscopy, Immunoprecipitation	Caveolin-1 in lipid rafts interacts with dengue virus NS3 during polyprotein processing and replication in HMEC-1 cells.
NS3	FASN	2194	24696471	DENV2	A549, 293, BHK-21	Co-localization by Immunofluorescence analysis, Immunoprecipitation, Western blot analysis	Rab18 facilitates dengue virus infection by targeting fatty acid synthase to sites of viral replication.
NS3	RAB18	22931	24696471	DENV2	A549, 293, BHK-21	Co-localization by Immunofluorescence analysis, Immunoprecipitation, Western blot analysis	Rab18 facilitates dengue virus infection by targeting fatty acid synthase to sites of viral replication.
NS3	ABCD3	5825	24855065	DENV2	Vero, HepG2, 293	Isotopic Differentiation of Interactions as Random or Targeted (I-DIRT) Immunoaffinity Purification followed by Mass spectrometry	Quantitative proteomic analysis of host-virus interactions reveals a role for Golgi brefeldin A resistance factor 1(GBF1) in dengue infection.
NS3	AIFM1	9131	24855065	DENV2	Vero, HepG2, 293	Isotopic Differentiation of Interactions as Random or Targeted (I-DIRT) Immunoaffinity Purification followed by Mass spectrometry	Quantitative proteomic analysis of host-virus interactions reveals a role for Golgi brefeldin A resistance factor 1(GBF1) in dengue infection.
NS3	ATAD3A	55210	24855065	DENV2	Vero, HepG2, 293	Isotopic Differentiation of Interactions as Random or Targeted (I-DIRT) Immunoaffinity Purification followed by Mass spectrometry	Quantitative proteomic analysis of host-virus interactions reveals a role for Golgi brefeldin A resistance factor 1(GBF1) in dengue infection.
NS3	ATP2A2	488	24855065	DENV2	Vero, HepG2, 293	Isotopic Differentiation of Interactions as Random or Targeted (I-DIRT) Immunoaffinity Purification followed by Mass spectrometry	Quantitative proteomic analysis of host-virus interactions reveals a role for Golgi brefeldin A resistance factor 1(GBF1) in dengue infection.
NS3	CAD	790	24855065	DENV2	Vero, HepG2, 293	Isotopic Differentiation of Interactions as Random or Targeted (I-DIRT) Immunoaffinity Purification followed by Mass spectrometry	Quantitative proteomic analysis of host-virus interactions reveals a role for Golgi brefeldin A resistance factor 1(GBF1) in dengue infection.
NS3	CDK1	983	24855065	DENV2	Vero, HepG2, 293	Isotopic Differentiation of Interactions as Random or Targeted (I-DIRT) Immunoaffinity Purification followed by Mass spectrometry	Quantitative proteomic analysis of host-virus interactions reveals a role for Golgi brefeldin A resistance factor 1(GBF1) in dengue infection.
NS3	CSE1L	1434	24855065	DENV2	Vero, HepG2, 293	Isotopic Differentiation of Interactions as Random or Targeted (I-DIRT) Immunoaffinity Purification followed by Mass spectrometry	Quantitative proteomic analysis of host-virus interactions reveals a role for Golgi brefeldin A resistance factor 1(GBF1) in dengue infection.
NS3	DHCR7	1717	24855065	DENV2	Vero, HepG2, 293	Isotopic Differentiation of Interactions as Random or Targeted (I-DIRT) Immunoaffinity Purification followed by Mass spectrometry	Quantitative proteomic analysis of host-virus interactions reveals a role for Golgi brefeldin A resistance factor 1(GBF1) in dengue infection.
NS3	DNAAF5	54919	24855065	DENV2	Vero, HepG2, 293	Isotopic Differentiation of Interactions as Random or Targeted (I-DIRT) Immunoaffinity Purification followed by Mass spectrometry	Quantitative proteomic analysis of host-virus interactions reveals a role for Golgi brefeldin A resistance factor 1(GBF1) in dengue infection.
NS3	DPM1	8813	24855065	DENV2	Vero, HepG2, 293	Isotopic Differentiation of Interactions as Random or Targeted (I-DIRT) Immunoaffinity Purification followed by Mass spectrometry	Quantitative proteomic analysis of host-virus interactions reveals a role for Golgi brefeldin A resistance factor 1(GBF1) in dengue infection.
NS3	EEF1G	1937	24855065	DENV2	Vero, HepG2, 293	Isotopic Differentiation of Interactions as Random or Targeted (I-DIRT) Immunoaffinity Purification followed by Mass spectrometry	Quantitative proteomic analysis of host-virus interactions reveals a role for Golgi brefeldin A resistance factor 1(GBF1) in dengue infection.
NS3	GCN1L1	10985	24855065	DENV2	Vero, HepG2, 293	Isotopic Differentiation of Interactions as Random or Targeted (I-DIRT) Immunoaffinity Purification followed by Mass spectrometry	Quantitative proteomic analysis of host-virus interactions reveals a role for Golgi brefeldin A resistance factor 1(GBF1) in dengue infection.
NS3	HACD3	51495	24855065	DENV2	Vero, HepG2, 293	Isotopic Differentiation of Interactions as Random or Targeted (I-DIRT) Immunoaffinity Purification followed by Mass spectrometry	Quantitative proteomic analysis of host-virus interactions reveals a role for Golgi brefeldin A resistance factor 1(GBF1) in dengue infection.
NS3	HSD17B12	51144	24855065	DENV2	Vero, HepG2, 293	Isotopic Differentiation of Interactions as Random or Targeted (I-DIRT) Immunoaffinity Purification followed by Mass spectrometry	Quantitative proteomic analysis of host-virus interactions reveals a role for Golgi brefeldin A resistance factor 1(GBF1) in dengue infection.
NS3	HSP90AB1	3326	24855065	DENV2	Vero, HepG2, 293	Isotopic Differentiation of Interactions as Random or Targeted (I-DIRT) Immunoaffinity Purification followed by Mass spectrometry	Quantitative proteomic analysis of host-virus interactions reveals a role for Golgi brefeldin A resistance factor 1(GBF1) in dengue infection.
NS3	HSPA1A	3303	24855065	DENV2	Vero, HepG2, 293	Isotopic Differentiation of Interactions as Random or Targeted (I-DIRT) Immunoaffinity Purification followed by Mass spectrometry	Quantitative proteomic analysis of host-virus interactions reveals a role for Golgi brefeldin A resistance factor 1(GBF1) in dengue infection.
NS3	HSPA8	3312	24855065	DENV2	Vero, HepG2, 293	Isotopic Differentiation of Interactions as Random or Targeted (I-DIRT) Immunoaffinity Purification followed by Mass spectrometry	Quantitative proteomic analysis of host-virus interactions reveals a role for Golgi brefeldin A resistance factor 1(GBF1) in dengue infection.
NS3	HSPB1	3315	24855065	DENV2	Vero, HepG2, 293	Isotopic Differentiation of Interactions as Random or Targeted (I-DIRT) Immunoaffinity Purification followed by Mass spectrometry	Quantitative proteomic analysis of host-virus interactions reveals a role for Golgi brefeldin A resistance factor 1(GBF1) in dengue infection.
NS3	HSPD1	3329	24855065	DENV2	Vero, HepG2, 293	Isotopic Differentiation of Interactions as Random or Targeted (I-DIRT) Immunoaffinity Purification followed by Mass spectrometry	Quantitative proteomic analysis of host-virus interactions reveals a role for Golgi brefeldin A resistance factor 1(GBF1) in dengue infection.
NS3	IPO4	79711	24855065	DENV2	Vero, HepG2, 293	Isotopic Differentiation of Interactions as Random or Targeted (I-DIRT) Immunoaffinity Purification followed by Mass spectrometry	Quantitative proteomic analysis of host-virus interactions reveals a role for Golgi brefeldin A resistance factor 1(GBF1) in dengue infection.
NS3	MRPL12	6182	24855065	DENV2	Vero, HepG2, 293	Isotopic Differentiation of Interactions as Random or Targeted (I-DIRT) Immunoaffinity Purification followed by Mass spectrometry	Quantitative proteomic analysis of host-virus interactions reveals a role for Golgi brefeldin A resistance factor 1(GBF1) in dengue infection.
NS3	PHGDH	26227	24855065	DENV2	Vero, HepG2, 293	Isotopic Differentiation of Interactions as Random or Targeted (I-DIRT) Immunoaffinity Purification followed by Mass spectrometry	Quantitative proteomic analysis of host-virus interactions reveals a role for Golgi brefeldin A resistance factor 1(GBF1) in dengue infection.
NS3	PRKDC	5591	24855065	DENV2	Vero, HepG2, 293	Isotopic Differentiation of Interactions as Random or Targeted (I-DIRT) Immunoaffinity Purification followed by Mass spectrometry	Quantitative proteomic analysis of host-virus interactions reveals a role for Golgi brefeldin A resistance factor 1(GBF1) in dengue infection.
NS3	RCN2	5955	24855065	DENV2	Vero, HepG2, 293	Isotopic Differentiation of Interactions as Random or Targeted (I-DIRT) Immunoaffinity Purification followed by Mass spectrometry	Quantitative proteomic analysis of host-virus interactions reveals a role for Golgi brefeldin A resistance factor 1(GBF1) in dengue infection.
NS3	RPS27A	6233	24855065	DENV2	Vero, HepG2, 293	Isotopic Differentiation of Interactions as Random or Targeted (I-DIRT) Immunoaffinity Purification followed by Mass spectrometry	Quantitative proteomic analysis of host-virus interactions reveals a role for Golgi brefeldin A resistance factor 1(GBF1) in dengue infection.
NS3	SEC61A1	29927	24855065	DENV2	Vero, HepG2, 293	Isotopic Differentiation of Interactions as Random or Targeted (I-DIRT) Immunoaffinity Purification followed by Mass spectrometry	Quantitative proteomic analysis of host-virus interactions reveals a role for Golgi brefeldin A resistance factor 1(GBF1) in dengue infection.
NS3	SERPINH1	871	24855065	DENV2	Vero, HepG2, 293	Isotopic Differentiation of Interactions as Random or Targeted (I-DIRT) Immunoaffinity Purification followed by Mass spectrometry	Quantitative proteomic analysis of host-virus interactions reveals a role for Golgi brefeldin A resistance factor 1(GBF1) in dengue infection.
NS3	SFXN1	94081	24855065	DENV2	Vero, HepG2, 293	Isotopic Differentiation of Interactions as Random or Targeted (I-DIRT) Immunoaffinity Purification followed by Mass spectrometry	Quantitative proteomic analysis of host-virus interactions reveals a role for Golgi brefeldin A resistance factor 1(GBF1) in dengue infection.
NS3	SLC16A1	6566	24855065	DENV2	Vero, HepG2, 293	Isotopic Differentiation of Interactions as Random or Targeted (I-DIRT) Immunoaffinity Purification followed by Mass spectrometry	Quantitative proteomic analysis of host-virus interactions reveals a role for Golgi brefeldin A resistance factor 1(GBF1) in dengue infection.
NS3	SLC25A1	6576	24855065	DENV2	Vero, HepG2, 293	Isotopic Differentiation of Interactions as Random or Targeted (I-DIRT) Immunoaffinity Purification followed by Mass spectrometry	Quantitative proteomic analysis of host-virus interactions reveals a role for Golgi brefeldin A resistance factor 1(GBF1) in dengue infection.
NS3	SLC25A11	8402	24855065	DENV2	Vero, HepG2, 293	Isotopic Differentiation of Interactions as Random or Targeted (I-DIRT) Immunoaffinity Purification followed by Mass spectrometry	Quantitative proteomic analysis of host-virus interactions reveals a role for Golgi brefeldin A resistance factor 1(GBF1) in dengue infection.
NS3	SLC25A13	10165	24855065	DENV2	Vero, HepG2, 293	Isotopic Differentiation of Interactions as Random or Targeted (I-DIRT) Immunoaffinity Purification followed by Mass spectrometry	Quantitative proteomic analysis of host-virus interactions reveals a role for Golgi brefeldin A resistance factor 1(GBF1) in dengue infection.
NS3	SLC25A3	5250	24855065	DENV2	Vero, HepG2, 293	Isotopic Differentiation of Interactions as Random or Targeted (I-DIRT) Immunoaffinity Purification followed by Mass spectrometry	Quantitative proteomic analysis of host-virus interactions reveals a role for Golgi brefeldin A resistance factor 1(GBF1) in dengue infection.
NS3	SLC25A5	292	24855065	DENV2	Vero, HepG2, 293	Isotopic Differentiation of Interactions as Random or Targeted (I-DIRT) Immunoaffinity Purification followed by Mass spectrometry	Quantitative proteomic analysis of host-virus interactions reveals a role for Golgi brefeldin A resistance factor 1(GBF1) in dengue infection.
NS3	SLC25A6	293	24855065	DENV2	Vero, HepG2, 293	Isotopic Differentiation of Interactions as Random or Targeted (I-DIRT) Immunoaffinity Purification followed by Mass spectrometry	Quantitative proteomic analysis of host-virus interactions reveals a role for Golgi brefeldin A resistance factor 1(GBF1) in dengue infection.
NS3	TECR	9524	24855065	DENV2	Vero, HepG2, 293	Isotopic Differentiation of Interactions as Random or Targeted (I-DIRT) Immunoaffinity Purification followed by Mass spectrometry	Quantitative proteomic analysis of host-virus interactions reveals a role for Golgi brefeldin A resistance factor 1(GBF1) in dengue infection.
NS3	TUBA1C	84790	24855065	DENV2	Vero, HepG2, 293	Isotopic Differentiation of Interactions as Random or Targeted (I-DIRT) Immunoaffinity Purification followed by Mass spectrometry	Quantitative proteomic analysis of host-virus interactions reveals a role for Golgi brefeldin A resistance factor 1(GBF1) in dengue infection.
NS3	TUBB	203068	24855065	DENV2	Vero, HepG2, 293	Isotopic Differentiation of Interactions as Random or Targeted (I-DIRT) Immunoaffinity Purification followed by Mass spectrometry	Quantitative proteomic analysis of host-virus interactions reveals a role for Golgi brefeldin A resistance factor 1(GBF1) in dengue infection.
NS3	VDAC3	7419	24855065	DENV2	Vero, HepG2, 293	Isotopic Differentiation of Interactions as Random or Targeted (I-DIRT) Immunoaffinity Purification followed by Mass spectrometry	Quantitative proteomic analysis of host-virus interactions reveals a role for Golgi brefeldin A resistance factor 1(GBF1) in dengue infection.
NS3	XPO1	7514	24855065	DENV2	Vero, HepG2, 293	Isotopic Differentiation of Interactions as Random or Targeted (I-DIRT) Immunoaffinity Purification followed by Mass spectrometry	Quantitative proteomic analysis of host-virus interactions reveals a role for Golgi brefeldin A resistance factor 1(GBF1) in dengue infection.
NS3	ZW10	9183	24855065	DENV2	Vero, HepG2, 293	Isotopic Differentiation of Interactions as Random or Targeted (I-DIRT) Immunoaffinity Purification followed by Mass spectrometry	Quantitative proteomic analysis of host-virus interactions reveals a role for Golgi brefeldin A resistance factor 1(GBF1) in dengue infection.
NS3	NRBP1	29959	24910013	DENV1, DENV2, DENV3, DENV4	insilico	Computational analysis	Insight into structural organization and protein-protein interaction of non structural 3 (NS3) proteins from dengue serotypes.
NS3	NFKBIA	4792	24973451	DENV2	293T, HMEC-1	Co-immunoprecipitation	Dengue viral protease interaction with NF-κB inhibitor α/β results in endothelial cell apoptosis and hemorrhage development
NS3	NFKBIB	4793	24973451	DENV2	293T, HMEC-1	Co-immunoprecipitation	Dengue viral protease interaction with NF-κB inhibitor α/β results in endothelial cell apoptosis and hemorrhage development
NS3	HSPA8	3312	26221025		293T	Pull down assay, Knock down analysis,	Dengue NS3, an RNAi suppressor, modulates the human-miRNA pathways through its interacting partner
NS3	SYNGR1	9145	26221025		293T	Pull down assay, Knock down analysis,	Dengue NS3, an RNAi suppressor, modulates the human-miRNA pathways through its interacting partner
NS3	TARBP2	6895	26221025		293T	Pull down assay, Knock down analysis,	Dengue NS3, an RNAi suppressor, modulates the human-miRNA pathways through its interacting partner
NS3	TAZ	6901	26221025		293T	Pull down assay, Knock down analysis,	Dengue NS3, an RNAi suppressor, modulates the human-miRNA pathways through its interacting partner
NS4A	PTBP1	5725	19380576	DENV2	BHK-21, Vero	RNA immunoprecipitation followed by mass spectrometry, Confocal immunofluorescence analysis, siRNA,	The polypyrimidine tract-binding protein is required for efficient dengue virus propagation and associates with the viral replication machinery.
NS4A	PTBP1	5725	19450550	DENV2	Huh-7	Y2H assay, siRNA, Co-immunopreipitation	Polypyrimidine tract-binding protein influences negative strand RNA synthesis of dengue virus.
NS4A	GAB1	2549	21358811	DENV2	insilico	Computational analysis	Mapping protein interactions between Dengue virus and its human and insect hosts.
NS4A	ZAP70	7535	21358811	DENV2	insilico	Computational analysis	Mapping protein interactions between Dengue virus and its human and insect hosts.
NS4A	CALCOCO2	10241	21911577	DENV2	Yeast	Y2H assay	A physical interaction network of dengue virus and human proteins.
NS4A	CNOT1	23019	21911577	DENV2	Yeast	Y2H assay	A physical interaction network of dengue virus and human proteins.
NS4A	FN1	2335	21911577	DENV2	Yeast	Y2H assay	A physical interaction network of dengue virus and human proteins.
NS4A	HAUS4	54930	21911577	DENV2	Yeast	Y2H assay	A physical interaction network of dengue virus and human proteins.
NS4A	TAX1BP1	8887	21911577	DENV2	Yeast	Y2H assay	A physical interaction network of dengue virus and human proteins.
NS4A	VIM	7431	24284321	DENV2	Huh7, BHK-21	Tandem affinity purification, Co-immunoprecipitation, Scanning electron microscopy, In situ proximity ligation assay (PLA), siRNA	Cellular vimentin regulates construction of dengue virus replication complexes through interaction with NS4A protein.
NS4A	EIF4A1	1973	25866185	DENV1, DENV2, DENV3	A549	Co-immunoprecipitation, siRNA	Eukaryotic initiation factor 4AI interacts with NS4A of Dengue virus and plays an antiviral role.
NS4A	DDX58	23586	25968648	DENV1	293T	Luciferase reporter assays, Western blot	Dengue Virus NS Proteins Inhibit RIG-I/MAVS Signaling by Blocking TBK1/IRF3 Phosphorylation: Dengue Virus Serotype 1 NS4A Is a Unique Interferon-Regulating Virulence Determinant
NS4A	IFIH1	64135	25968648	DENV1	293T	Luciferase reporter assays, Western blot	Dengue Virus NS Proteins Inhibit RIG-I/MAVS Signaling by Blocking TBK1/IRF3 Phosphorylation: Dengue Virus Serotype 1 NS4A Is a Unique Interferon-Regulating Virulence Determinant
NS4A	IKBKE	9641	25968648	DENV1	293T	Luciferase reporter assays, Western blot	Dengue Virus NS Proteins Inhibit RIG-I/MAVS Signaling by Blocking TBK1/IRF3 Phosphorylation: Dengue Virus Serotype 1 NS4A Is a Unique Interferon-Regulating Virulence Determinant
NS4A	MAVS	57506	25968648	DENV1	293T	Luciferase reporter assays, Western blot	Dengue Virus NS Proteins Inhibit RIG-I/MAVS Signaling by Blocking TBK1/IRF3 Phosphorylation: Dengue Virus Serotype 1 NS4A Is a Unique Interferon-Regulating Virulence Determinant
NS4A	TBK1	29110	25968648	DENV1	293T	Luciferase reporter assays, Western blot	Dengue Virus NS Proteins Inhibit RIG-I/MAVS Signaling by Blocking TBK1/IRF3 Phosphorylation: Dengue Virus Serotype 1 NS4A Is a Unique Interferon-Regulating Virulence Determinant
NS4B	STAT1	6772	14612562	DENV2	293T, Vero	Reporter Gene Assays, Immunofluorescence	Inhibition of interferon signaling by dengue virus
NS4B	AFTPH	54812	21358811	DENV2	insilico	Computational analysis	Mapping protein interactions between Dengue virus and its human and insect hosts.
NS4B	AP1M1	8907	21358811	DENV2	insilico	Computational analysis	Mapping protein interactions between Dengue virus and its human and insect hosts.
NS4B	CLK1	1195	21358811	DENV2	insilico	Computational analysis	Mapping protein interactions between Dengue virus and its human and insect hosts.
NS4B	COIL	8161	21358811	DENV2	insilico	Computational analysis	Mapping protein interactions between Dengue virus and its human and insect hosts.
NS4B	CSNK2A1	1457	21358811	DENV2	insilico	Computational analysis	Mapping protein interactions between Dengue virus and its human and insect hosts.
NS4B	CST3	1471	21358811	DENV2	insilico	Computational analysis	Mapping protein interactions between Dengue virus and its human and insect hosts.
NS4B	DHX15	1665	21358811	DENV2	insilico	Computational analysis	Mapping protein interactions between Dengue virus and its human and insect hosts.
NS4B	GAB1	2549	21358811	DENV2	insilico	Computational analysis	Mapping protein interactions between Dengue virus and its human and insect hosts.
NS4B	KIF17	57576	21358811	DENV2	insilico	Computational analysis	Mapping protein interactions between Dengue virus and its human and insect hosts.
NS4B	NUMBL	9253	21358811	DENV2	insilico	Computational analysis	Mapping protein interactions between Dengue virus and its human and insect hosts.
NS4B	TAZ	6901	21358811	DENV2	insilico	Computational analysis	Mapping protein interactions between Dengue virus and its human and insect hosts.
NS4B	TESK1	7016	21358811	DENV2	insilico	Computational analysis	Mapping protein interactions between Dengue virus and its human and insect hosts.
NS4B	UBE2I	7329	21358811	DENV2	insilico	Computational analysis	Mapping protein interactions between Dengue virus and its human and insect hosts.
NS4B	ZAP70	7535	21358811	DENV2	insilico	Computational analysis	Mapping protein interactions between Dengue virus and its human and insect hosts.
NS4B	CXCL10	3627	21810535	DENV2	THP-1	FACS, qRT-PCR, Western blot	Maturation of dengue virus nonstructural protein 4B in monocytes enhances production of dengue hemorrhagic fever-associated chemokines and cytokines.
NS4B	CXCL8	3576	21810535	DENV2	THP-1	FACS, qRT-PCR, Western blot	Maturation of dengue virus nonstructural protein 4B in monocytes enhances production of dengue hemorrhagic fever-associated chemokines and cytokines.
NS4B	IFNG	3458	21810535	DENV2	THP-1	FACS, qRT-PCR, Western blot	Maturation of dengue virus nonstructural protein 4B in monocytes enhances production of dengue hemorrhagic fever-associated chemokines and cytokines.
NS4B	IL6	3569	21810535	DENV2	THP-1	FACS, qRT-PCR, Western blot	Maturation of dengue virus nonstructural protein 4B in monocytes enhances production of dengue hemorrhagic fever-associated chemokines and cytokines.
NS4B	TNF	7124	21810535	DENV2	THP-1	FACS, qRT-PCR, Western blot	Maturation of dengue virus nonstructural protein 4B in monocytes enhances production of dengue hemorrhagic fever-associated chemokines and cytokines.
NS4B	KRT8	3856	21911577	DENV2	Yeast	Y2H assay	A physical interaction network of dengue virus and human proteins.
NS4B	PGK1	5230	21911577	DENV2	Yeast	Y2H assay	A physical interaction network of dengue virus and human proteins.
NS4B	UBE2I	7329	21911577	DENV2	Yeast	Y2H assay	A physical interaction network of dengue virus and human proteins.
NS4B	DDX58	23586	25968648	DENV1, DENV2, DENV4	293T	Luciferase reporter assays, Western blot	Dengue Virus NS Proteins Inhibit RIG-I/MAVS Signaling by Blocking TBK1/IRF3 Phosphorylation: Dengue Virus Serotype 1 NS4A Is a Unique Interferon-Regulating Virulence Determinant
NS4B	IFIH1	64135	25968648	DENV1, DENV2, DENV4	293T	Luciferase reporter assays, Western blot	Dengue Virus NS Proteins Inhibit RIG-I/MAVS Signaling by Blocking TBK1/IRF3 Phosphorylation: Dengue Virus Serotype 1 NS4A Is a Unique Interferon-Regulating Virulence Determinant
NS4B	IKBKE	9641	25968648	DENV1, DENV2, DENV4	293T	Luciferase reporter assays, Western blot	Dengue Virus NS Proteins Inhibit RIG-I/MAVS Signaling by Blocking TBK1/IRF3 Phosphorylation: Dengue Virus Serotype 1 NS4A Is a Unique Interferon-Regulating Virulence Determinant
NS4B	MAVS	57506	25968648	DENV1, DENV2, DENV4	293T	Luciferase reporter assays, Western blot	Dengue Virus NS Proteins Inhibit RIG-I/MAVS Signaling by Blocking TBK1/IRF3 Phosphorylation: Dengue Virus Serotype 1 NS4A Is a Unique Interferon-Regulating Virulence Determinant
NS4B	TBK1	29110	25968648	DENV1, DENV2, DENV4	293T	Luciferase reporter assays, Western blot	Dengue Virus NS Proteins Inhibit RIG-I/MAVS Signaling by Blocking TBK1/IRF3 Phosphorylation: Dengue Virus Serotype 1 NS4A Is a Unique Interferon-Regulating Virulence Determinant
NS5	KPNB1	3837	11257177	DENV2	Yeast	Y2H assay, GST pull-down assay	A small region of the dengue virus-encoded RNA-dependent RNA polymerase, NS5, confers interaction with both the nuclear transport receptor importin-beta and the viral helicase, NS3.
NS5	KPNB1	3837	11347963	DENV2	Yeast	Y2H assay	Characterisation of inter- and intra-molecular interactions of the dengue virus RNA dependent RNA polymerase as potential drug targets.
NS5	SSB	6741	15084396	DENV4	U937	UV-induced cross-linking assay	La protein binds to NS5 and NS3 and to the 5' and 3' ends of Dengue 4 virus RNA.
NS5	CXCL8	3576	16103156	DENV2	HepG2, Primary Dendritic cells	ELISA, Quantitative RT-PCR	Dengue virus nonstructural protein NS5 induces interleukin-8 transcription and secretion.
NS5	XPO1	7514	17319160	DENV2	Vero		CRM1-dependent nuclear export of dengue virus type 2 NS5.
NS5	TJP1	7082	19199833	DENV2	Picchia pastoris, Epithelial cells	Signal PDZ Domain arrays, Immunostaining and confocal laser scanning microscopy	Flavivirus NS5 associates with host-cell proteins zonula occludens-1 (ZO-1) and regulating synaptic membrane exocytosis-2 (RIMS2) via an internal PDZ binding mechanism.
NS5	STAT2	6773	19279106	DENV2	293T, Vero, U6A	Immunoprecipitation, FACS	NS5 of dengue virus mediates STAT2 binding and degradation.
NS5	XPO1	7514	19297323	DENV2	Vero, 293,293T_x000D_	GST pull down assay, Site-directed mutagenesis, Indirect Immunofluroscence staining	CRM1-mediated nuclear export of dengue virus RNA polymerase NS5 modulates interleukin-8 induction and virus production.
NS5	STAT2	6773	19754307	DENV2	K562	Co-immunoprecipitation	Dengue virus NS5 inhibits interferon-alpha signaling by blocking signal transducer and activator of transcription 2 phosphorylation.
NS5	AKAP9	10142	21911577	DENV2	Yeast	Y2H assay	A physical interaction network of dengue virus and human proteins.
NS5	ALDH3A2	224	21911577	DENV2	Yeast	Y2H assay	A physical interaction network of dengue virus and human proteins.
NS5	ANKRD50	57182	21911577	DENV2	Yeast	Y2H assay	A physical interaction network of dengue virus and human proteins.
NS5	APOB	338	21911577	DENV2	Yeast	Y2H assay	A physical interaction network of dengue virus and human proteins.
NS5	CALR	811	21911577	DENV2	Yeast	Y2H assay	A physical interaction network of dengue virus and human proteins.
NS5	CAT	847	21911577	DENV2	Yeast	Y2H assay	A physical interaction network of dengue virus and human proteins.
NS5	CCDC88C	440193	21911577	DENV2	Yeast	Y2H assay	A physical interaction network of dengue virus and human proteins.
NS5	CEP135	9662	21911577	DENV2	Yeast	Y2H assay	A physical interaction network of dengue virus and human proteins.
NS5	CGNL1	84952	21911577	DENV2	Yeast	Y2H assay	A physical interaction network of dengue virus and human proteins.
NS5	COBLL1	22837	21911577	DENV2	Yeast	Y2H assay	A physical interaction network of dengue virus and human proteins.
NS5	COPS2	9318	21911577	DENV2	Yeast	Y2H assay	A physical interaction network of dengue virus and human proteins.
NS5	CTNNB1	1499	21911577	DENV2	Yeast	Y2H assay	A physical interaction network of dengue virus and human proteins.
NS5	CUL7	9820	21911577	DENV2	Yeast	Y2H assay	A physical interaction network of dengue virus and human proteins.
NS5	DCUN1D4	23142	21911577	DENV2	Yeast	Y2H assay	A physical interaction network of dengue virus and human proteins.
NS5	DDX3X	1654	21911577	DENV2	Yeast	Y2H assay	A physical interaction network of dengue virus and human proteins.
NS5	DDX5	1655	21911577	DENV2	Yeast	Y2H assay	A physical interaction network of dengue virus and human proteins.
NS5	DST	667	21911577	DENV2	Yeast	Y2H assay	A physical interaction network of dengue virus and human proteins.
NS5	EID1	23741	21911577	DENV2	Yeast	Y2H assay	A physical interaction network of dengue virus and human proteins.
NS5	ERC1	23085	21911577	DENV2	Yeast	Y2H assay	A physical interaction network of dengue virus and human proteins.
NS5	FGA	2243	21911577	DENV2	Yeast	Y2H assay	A physical interaction network of dengue virus and human proteins.
NS5	GOLGA2	2801	21911577	DENV2	Yeast	Y2H assay	A physical interaction network of dengue virus and human proteins.
NS5	HOOK1	51361	21911577	DENV2	Yeast	Y2H assay	A physical interaction network of dengue virus and human proteins.
NS5	LUC7L3	51747	21911577	DENV2	Yeast	Y2H assay	A physical interaction network of dengue virus and human proteins.
NS5	MATR3	9782	21911577	DENV2	Yeast	Y2H assay	A physical interaction network of dengue virus and human proteins.
NS5	NUMA1	4926	21911577	DENV2	Yeast	Y2H assay	A physical interaction network of dengue virus and human proteins.
NS5	NUP50	10762	21911577	DENV2	Yeast	Y2H assay	A physical interaction network of dengue virus and human proteins.
NS5	PCNT	5116	21911577	DENV2	Yeast	Y2H assay	A physical interaction network of dengue virus and human proteins.
NS5	PIAS1	8554	21911577	DENV2	Yeast	Y2H assay	A physical interaction network of dengue virus and human proteins.
NS5	RILPL2	196383	21911577	DENV2	Yeast	Y2H assay	A physical interaction network of dengue virus and human proteins.
NS5	RNASET2	8635	21911577	DENV2	Yeast	Y2H assay	A physical interaction network of dengue virus and human proteins.
NS5	SDCCAG8	10806	21911577	DENV2	Yeast	Y2H assay	A physical interaction network of dengue virus and human proteins.
NS5	SPTAN1	6709	21911577	DENV2	Yeast	Y2H assay	A physical interaction network of dengue virus and human proteins.
NS5	SPTBN2	6712	21911577	DENV2	Yeast	Y2H assay	A physical interaction network of dengue virus and human proteins.
NS5	SRSF11	9295	21911577	DENV2	Yeast	Y2H assay	A physical interaction network of dengue virus and human proteins.
NS5	STAT2	6773	21911577	DENV2	Yeast	Y2H assay	A physical interaction network of dengue virus and human proteins.
NS5	SYNE1	23345	21911577	DENV2	Yeast	Y2H assay	A physical interaction network of dengue virus and human proteins.
NS5	TP53BP2	7159	21911577	DENV2	Yeast	Y2H assay	A physical interaction network of dengue virus and human proteins.
NS5	TRIM62	55223	21911577	DENV2	Yeast	Y2H assay	A physical interaction network of dengue virus and human proteins.
NS5	TRIP11	9321	21911577	DENV2	Yeast	Y2H assay	A physical interaction network of dengue virus and human proteins.
NS5	TTC1	7265	21911577	DENV2	Yeast	Y2H assay	A physical interaction network of dengue virus and human proteins.
NS5	UBE2I	7329	21911577	DENV2	Yeast	Y2H assay	A physical interaction network of dengue virus and human proteins.
NS5	VPS37A	137492	21911577	DENV2	Yeast	Y2H assay	A physical interaction network of dengue virus and human proteins.
NS5	ARID2	196528	22014111	DENV1	Yeast, 293	Y2H assay, Co-immunoprecipitation	Flavivirus NS3 and NS5 proteins interaction network: a high-throughput yeast two-hybrid screen.
NS5	DNM2	1785	22014111	DENV1	Yeast, 293	Y2H assay, Co-immunoprecipitation	Flavivirus NS3 and NS5 proteins interaction network: a high-throughput yeast two-hybrid screen.
NS5	ITIH3	3699	22014111	DENV1	Yeast, 293	Y2H assay, Co-immunoprecipitation	Flavivirus NS3 and NS5 proteins interaction network: a high-throughput yeast two-hybrid screen.
NS5	KPNB1	3837	22014111	DENV1	Yeast, 293	Y2H assay, Co-immunoprecipitation	Flavivirus NS3 and NS5 proteins interaction network: a high-throughput yeast two-hybrid screen.
NS5	MATR3	9782	22014111	DENV1	Yeast, 293	Y2H assay, Co-immunoprecipitation	Flavivirus NS3 and NS5 proteins interaction network: a high-throughput yeast two-hybrid screen.
NS5	MLPH	79083	22014111	DENV1	Yeast, 293	Y2H assay, Co-immunoprecipitation	Flavivirus NS3 and NS5 proteins interaction network: a high-throughput yeast two-hybrid screen.
NS5	MYH9	4627	22014111	DENV1	Yeast, 293	Y2H assay, Co-immunoprecipitation	Flavivirus NS3 and NS5 proteins interaction network: a high-throughput yeast two-hybrid screen.
NS5	RNF125	54941	22014111	DENV1	Yeast, 293	Y2H assay, Co-immunoprecipitation	Flavivirus NS3 and NS5 proteins interaction network: a high-throughput yeast two-hybrid screen.
NS5	SIAH2	6478	22014111	DENV1	Yeast, 293	Y2H assay, Co-immunoprecipitation	Flavivirus NS3 and NS5 proteins interaction network: a high-throughput yeast two-hybrid screen.
NS5	SSB	6741	22014111	DENV1	Yeast, 293	Y2H assay, Co-immunoprecipitation	Flavivirus NS3 and NS5 proteins interaction network: a high-throughput yeast two-hybrid screen.
NS5	STAT2	6773	22014111	DENV1	Yeast, 293	Y2H assay, Co-immunoprecipitation	Flavivirus NS3 and NS5 proteins interaction network: a high-throughput yeast two-hybrid screen.
NS5	TAF15	8148	22014111	DENV1	Yeast, 293	Y2H assay, Co-immunoprecipitation	Flavivirus NS3 and NS5 proteins interaction network: a high-throughput yeast two-hybrid screen.
NS5	TOM1L1	10040	22014111	DENV1	Yeast, 293	Y2H assay, Co-immunoprecipitation	Flavivirus NS3 and NS5 proteins interaction network: a high-throughput yeast two-hybrid screen.
NS5	VPS11	55823	22014111	DENV1	Yeast, 293	Y2H assay, Co-immunoprecipitation	Flavivirus NS3 and NS5 proteins interaction network: a high-throughput yeast two-hybrid screen.
NS5	XPO1	7514	22014111	DENV1	Yeast, 293	Y2H assay, Co-immunoprecipitation	Flavivirus NS3 and NS5 proteins interaction network: a high-throughput yeast two-hybrid screen.
NS5	DAXX	1616	22664104	DENV2	Yeast, 293T	Y2H assay, Co-immunoprecipitation, Co-localization, Mutational analysis	Interaction of dengue virus nonstructural protein 5 with Daxx modulates RANTES production.
NS5	HSPA1L	3305	22810585	DENV2	Yeast	Y2H assay	Viral immune modulators perturb the human molecular network by common and unique strategies
NS5	NEFH	4744	22810585	DENV2	Yeast	Y2H assay	Viral immune modulators perturb the human molecular network by common and unique strategies
NS5	CYTIP	9595	23326450	DENV1, DENV2, DENV3, DENV4	Yeast	Y2H assay	Identification of new protein interactions between dengue fever virus and its hosts, human and mosquito.
NS5	DERL2	51009	23326450	DENV1, DENV2, DENV3, DENV4	Yeast	Y2H assay	Identification of new protein interactions between dengue fever virus and its hosts, human and mosquito.
NS5	EAF1	85403	23326450	DENV1, DENV2, DENV3, DENV4	Yeast	Y2H assay	Identification of new protein interactions between dengue fever virus and its hosts, human and mosquito.
NS5	EAF2	55840	23326450	DENV1, DENV2, DENV3, DENV4	Yeast	Y2H assay	Identification of new protein interactions between dengue fever virus and its hosts, human and mosquito.
NS5	EEF1B2	1933	23326450	DENV1, DENV2, DENV3, DENV4	Yeast	Y2H assay	Identification of new protein interactions between dengue fever virus and its hosts, human and mosquito.
NS5	FAM192A	80011	23326450	DENV1, DENV2, DENV3, DENV4	Yeast	Y2H assay	Identification of new protein interactions between dengue fever virus and its hosts, human and mosquito.
NS5	FMR1	2332	23326450	DENV1, DENV2, DENV3, DENV4	Yeast	Y2H assay	Identification of new protein interactions between dengue fever virus and its hosts, human and mosquito.
NS5	HBB	3043	23326450	DENV1, DENV2, DENV3, DENV4	Yeast	Y2H assay	Identification of new protein interactions between dengue fever virus and its hosts, human and mosquito.
NS5	HSPA5	3309	23326450	DENV1, DENV2, DENV3, DENV4	Yeast	Y2H assay	Identification of new protein interactions between dengue fever virus and its hosts, human and mosquito.
NS5	IMPDH2	3615	23326450	DENV1, DENV2, DENV3, DENV4	Yeast	Y2H assay	Identification of new protein interactions between dengue fever virus and its hosts, human and mosquito.
NS5	PSMC1	5700	23326450	DENV1, DENV2, DENV3, DENV4	Yeast	Y2H assay	Identification of new protein interactions between dengue fever virus and its hosts, human and mosquito.
NS5	RILPL2	196383	23326450	DENV1, DENV2, DENV3, DENV4	Yeast	Y2H assay	Identification of new protein interactions between dengue fever virus and its hosts, human and mosquito.
NS5	RPL12	6136	23326450	DENV1, DENV2, DENV3, DENV4	Yeast	Y2H assay	Identification of new protein interactions between dengue fever virus and its hosts, human and mosquito.
NS5	TRIM2	23321	23326450	DENV1, DENV2, DENV3, DENV4	Yeast	Y2H assay	Identification of new protein interactions between dengue fever virus and its hosts, human and mosquito.
NS5	WWP1	11059	23326450	DENV1, DENV2, DENV3, DENV4	Yeast	Y2H assay	Identification of new protein interactions between dengue fever virus and its hosts, human and mosquito.
NS5	XPA	7507	23326450	DENV1, DENV2, DENV3, DENV4	Yeast	Y2H assay	Identification of new protein interactions between dengue fever virus and its hosts, human and mosquito.
NS5	STAT2	6773	23555265	DENV1, DENV2, DENV3, DENV4	293T, Hepa1.6, U6A, BHK, Vero	Tandem affinity purification, immunoprecipitation and Quantitative RT-PCR (qPC)_x000D_	Dengue virus co-opts UBR4 to degrade STAT2 and antagonize type I interferon signaling.
NS5	UBR4	23352	23555265	DENV1, DENV2, DENV3, DENV4	293T, Hepa1.6, U6A, BHK, Vero	Tandem affinity purification, immunoprecipitation and Quantitative RT-PCR (qCR)	Dengue virus co-opts UBR4 to degrade STAT2 and antagonize type I interferon signaling.
NS5	ADCK3	56997	24855065	DENV2	Vero, HepG2, 293	Isotopic Differentiation of Interactions as Random or Targeted (I-DIRT) Immunoaffinity Purification followed by Mass spectrometry	Quantitative proteomic analysis of host-virus interactions reveals a role for Golgi brefeldin A resistance factor 1(GBF1) in dengue infection.
NS5	ARHGEF2	9181	24855065	DENV2	Vero, HepG2, 293	Isotopic Differentiation of Interactions as Random or Targeted (I-DIRT) Immunoaffinity Purification followed by Mass spectrometry	Quantitative proteomic analysis of host-virus interactions reveals a role for Golgi brefeldin A resistance factor 1(GBF1) in dengue infection.
NS5	ATP1A1	476	24855065	DENV2	Vero, HepG2, 293	Isotopic Differentiation of Interactions as Random or Targeted (I-DIRT) Immunoaffinity Purification followed by Mass spectrometry	Quantitative proteomic analysis of host-virus interactions reveals a role for Golgi brefeldin A resistance factor 1(GBF1) in dengue infection.
NS5	BRAT1	221927	24855065	DENV2	Vero, HepG2, 293	Isotopic Differentiation of Interactions as Random or Targeted (I-DIRT) Immunoaffinity Purification followed by Mass spectrometry	Quantitative proteomic analysis of host-virus interactions reveals a role for Golgi brefeldin A resistance factor 1(GBF1) in dengue infection.
NS5	CAD	790	24855065	DENV2	Vero, HepG2, 293	Isotopic Differentiation of Interactions as Random or Targeted (I-DIRT) Immunoaffinity Purification followed by Mass spectrometry	Quantitative proteomic analysis of host-virus interactions reveals a role for Golgi brefeldin A resistance factor 1(GBF1) in dengue infection.
NS5	CCAR2	57805	24855065	DENV2	Vero, HepG2, 293	Isotopic Differentiation of Interactions as Random or Targeted (I-DIRT) Immunoaffinity Purification followed by Mass spectrometry	Quantitative proteomic analysis of host-virus interactions reveals a role for Golgi brefeldin A resistance factor 1(GBF1) in dengue infection.
NS5	COPG2	26958	24855065	DENV2	Vero, HepG2, 293	Isotopic Differentiation of Interactions as Random or Targeted (I-DIRT) Immunoaffinity Purification followed by Mass spectrometry	Quantitative proteomic analysis of host-virus interactions reveals a role for Golgi brefeldin A resistance factor 1(GBF1) in dengue infection.
NS5	CSE1L	1434	24855065	DENV2	Vero, HepG2, 293	Isotopic Differentiation of Interactions as Random or Targeted (I-DIRT) Immunoaffinity Purification followed by Mass spectrometry	Quantitative proteomic analysis of host-virus interactions reveals a role for Golgi brefeldin A resistance factor 1(GBF1) in dengue infection.
NS5	CTNND1	1500	24855065	DENV2	Vero, HepG2, 293	Isotopic Differentiation of Interactions as Random or Targeted (I-DIRT) Immunoaffinity Purification followed by Mass spectrometry	Quantitative proteomic analysis of host-virus interactions reveals a role for Golgi brefeldin A resistance factor 1(GBF1) in dengue infection.
NS5	DHCR7	1717	24855065	DENV2	Vero, HepG2, 293	Isotopic Differentiation of Interactions as Random or Targeted (I-DIRT) Immunoaffinity Purification followed by Mass spectrometry	Quantitative proteomic analysis of host-virus interactions reveals a role for Golgi brefeldin A resistance factor 1(GBF1) in dengue infection.
NS5	DYNC1H1	1778	24855065	DENV2	Vero, HepG2, 293	Isotopic Differentiation of Interactions as Random or Targeted (I-DIRT) Immunoaffinity Purification followed by Mass spectrometry	Quantitative proteomic analysis of host-virus interactions reveals a role for Golgi brefeldin A resistance factor 1(GBF1) in dengue infection.
NS5	EARS2	124454	24855065	DENV2	Vero, HepG2, 293	Isotopic Differentiation of Interactions as Random or Targeted (I-DIRT) Immunoaffinity Purification followed by Mass spectrometry	Quantitative proteomic analysis of host-virus interactions reveals a role for Golgi brefeldin A resistance factor 1(GBF1) in dengue infection.
NS5	EIF4G2	1982	24855065	DENV2	Vero, HepG2, 293	Isotopic Differentiation of Interactions as Random or Targeted (I-DIRT) Immunoaffinity Purification followed by Mass spectrometry	Quantitative proteomic analysis of host-virus interactions reveals a role for Golgi brefeldin A resistance factor 1(GBF1) in dengue infection.
NS5	ERLIN2	11160	24855065	DENV2	Vero, HepG2, 293	Isotopic Differentiation of Interactions as Random or Targeted (I-DIRT) Immunoaffinity Purification followed by Mass spectrometry	Quantitative proteomic analysis of host-virus interactions reveals a role for Golgi brefeldin A resistance factor 1(GBF1) in dengue infection.
NS5	FAF2	23197	24855065	DENV2	Vero, HepG2, 293	Isotopic Differentiation of Interactions as Random or Targeted (I-DIRT) Immunoaffinity Purification followed by Mass spectrometry	Quantitative proteomic analysis of host-virus interactions reveals a role for Golgi brefeldin A resistance factor 1(GBF1) in dengue infection.
NS5	FASN	2194	24855065	DENV2	Vero, HepG2, 293	Isotopic Differentiation of Interactions as Random or Targeted (I-DIRT) Immunoaffinity Purification followed by Mass spectrometry	Quantitative proteomic analysis of host-virus interactions reveals a role for Golgi brefeldin A resistance factor 1(GBF1) in dengue infection.
NS5	FLNA	2316	24855065	DENV2	Vero, HepG2, 293	Isotopic Differentiation of Interactions as Random or Targeted (I-DIRT) Immunoaffinity Purification followed by Mass spectrometry	Quantitative proteomic analysis of host-virus interactions reveals a role for Golgi brefeldin A resistance factor 1(GBF1) in dengue infection.
NS5	GBF1	8729	24855065	DENV2	Vero, HepG2, 293	Isotopic Differentiation of Interactions as Random or Targeted (I-DIRT) Immunoaffinity Purification followed by Mass spectrometry	Quantitative proteomic analysis of host-virus interactions reveals a role for Golgi brefeldin A resistance factor 1(GBF1) in dengue infection.
NS5	GCN1L1	10985	24855065	DENV2	Vero, HepG2, 293	Isotopic Differentiation of Interactions as Random or Targeted (I-DIRT) Immunoaffinity Purification followed by Mass spectrometry	Quantitative proteomic analysis of host-virus interactions reveals a role for Golgi brefeldin A resistance factor 1(GBF1) in dengue infection.
NS5	HACD3	51495	24855065	DENV2	Vero, HepG2, 293	Isotopic Differentiation of Interactions as Random or Targeted (I-DIRT) Immunoaffinity Purification followed by Mass spectrometry	Quantitative proteomic analysis of host-virus interactions reveals a role for Golgi brefeldin A resistance factor 1(GBF1) in dengue infection.
NS5	HAX1	10456	24855065	DENV2	Vero, HepG2, 293	Isotopic Differentiation of Interactions as Random or Targeted (I-DIRT) Immunoaffinity Purification followed by Mass spectrometry	Quantitative proteomic analysis of host-virus interactions reveals a role for Golgi brefeldin A resistance factor 1(GBF1) in dengue infection.
NS5	HEATR1	55127	24855065	DENV2	Vero, HepG2, 293	Isotopic Differentiation of Interactions as Random or Targeted (I-DIRT) Immunoaffinity Purification followed by Mass spectrometry	Quantitative proteomic analysis of host-virus interactions reveals a role for Golgi brefeldin A resistance factor 1(GBF1) in dengue infection.
NS5	HSD17B12	51144	24855065	DENV2	Vero, HepG2, 293	Isotopic Differentiation of Interactions as Random or Targeted (I-DIRT) Immunoaffinity Purification followed by Mass spectrometry	Quantitative proteomic analysis of host-virus interactions reveals a role for Golgi brefeldin A resistance factor 1(GBF1) in dengue infection.
NS5	HSP90AA1	3320	24855065	DENV2	Vero, HepG2, 293	Isotopic Differentiation of Interactions as Random or Targeted (I-DIRT) Immunoaffinity Purification followed by Mass spectrometry	Quantitative proteomic analysis of host-virus interactions reveals a role for Golgi brefeldin A resistance factor 1(GBF1) in dengue infection.
NS5	KIAA0368	23392	24855065	DENV2	Vero, HepG2, 293	Isotopic Differentiation of Interactions as Random or Targeted (I-DIRT) Immunoaffinity Purification followed by Mass spectrometry	Quantitative proteomic analysis of host-virus interactions reveals a role for Golgi brefeldin A resistance factor 1(GBF1) in dengue infection.
NS5	KIAA1524	57650	24855065	DENV2	Vero, HepG2, 293	Isotopic Differentiation of Interactions as Random or Targeted (I-DIRT) Immunoaffinity Purification followed by Mass spectrometry	Quantitative proteomic analysis of host-virus interactions reveals a role for Golgi brefeldin A resistance factor 1(GBF1) in dengue infection.
NS5	KNTC1	9735	24855065	DENV2	Vero, HepG2, 293	Isotopic Differentiation of Interactions as Random or Targeted (I-DIRT) Immunoaffinity Purification followed by Mass spectrometry	Quantitative proteomic analysis of host-virus interactions reveals a role for Golgi brefeldin A resistance factor 1(GBF1) in dengue infection.
NS5	MAGED2	10916	24855065	DENV2	Vero, HepG2, 293	Isotopic Differentiation of Interactions as Random or Targeted (I-DIRT) Immunoaffinity Purification followed by Mass spectrometry	Quantitative proteomic analysis of host-virus interactions reveals a role for Golgi brefeldin A resistance factor 1(GBF1) in dengue infection.
NS5	MAPRE2	10982	24855065	DENV2	Vero, HepG2, 293	Isotopic Differentiation of Interactions as Random or Targeted (I-DIRT) Immunoaffinity Purification followed by Mass spectrometry	Quantitative proteomic analysis of host-virus interactions reveals a role for Golgi brefeldin A resistance factor 1(GBF1) in dengue infection.
NS5	MMS19	64210	24855065	DENV2	Vero, HepG2, 293	Isotopic Differentiation of Interactions as Random or Targeted (I-DIRT) Immunoaffinity Purification followed by Mass spectrometry	Quantitative proteomic analysis of host-virus interactions reveals a role for Golgi brefeldin A resistance factor 1(GBF1) in dengue infection.
NS5	MRPL12	6182	24855065	DENV2	Vero, HepG2, 293	Isotopic Differentiation of Interactions as Random or Targeted (I-DIRT) Immunoaffinity Purification followed by Mass spectrometry	Quantitative proteomic analysis of host-virus interactions reveals a role for Golgi brefeldin A resistance factor 1(GBF1) in dengue infection.
NS5	MTOR	2475	24855065	DENV2	Vero, HepG2, 293	Isotopic Differentiation of Interactions as Random or Targeted (I-DIRT) Immunoaffinity Purification followed by Mass spectrometry	Quantitative proteomic analysis of host-virus interactions reveals a role for Golgi brefeldin A resistance factor 1(GBF1) in dengue infection.
NS5	NCAPG2	54892	24855065	DENV2	Vero, HepG2, 293	Isotopic Differentiation of Interactions as Random or Targeted (I-DIRT) Immunoaffinity Purification followed by Mass spectrometry	Quantitative proteomic analysis of host-virus interactions reveals a role for Golgi brefeldin A resistance factor 1(GBF1) in dengue infection.
NS5	NCLN	56926	24855065	DENV2	Vero, HepG2, 293	Isotopic Differentiation of Interactions as Random or Targeted (I-DIRT) Immunoaffinity Purification followed by Mass spectrometry	Quantitative proteomic analysis of host-virus interactions reveals a role for Golgi brefeldin A resistance factor 1(GBF1) in dengue infection.
NS5	NF1	4763	24855065	DENV2	Vero, HepG2, 293	Isotopic Differentiation of Interactions as Random or Targeted (I-DIRT) Immunoaffinity Purification followed by Mass spectrometry	Quantitative proteomic analysis of host-virus interactions reveals a role for Golgi brefeldin A resistance factor 1(GBF1) in dengue infection.
NS5	NOC4L	79050	24855065	DENV2	Vero, HepG2, 293	Isotopic Differentiation of Interactions as Random or Targeted (I-DIRT) Immunoaffinity Purification followed by Mass spectrometry	Quantitative proteomic analysis of host-virus interactions reveals a role for Golgi brefeldin A resistance factor 1(GBF1) in dengue infection.
NS5	PRKDC	5591	24855065	DENV2	Vero, HepG2, 293	Isotopic Differentiation of Interactions as Random or Targeted (I-DIRT) Immunoaffinity Purification followed by Mass spectrometry	Quantitative proteomic analysis of host-virus interactions reveals a role for Golgi brefeldin A resistance factor 1(GBF1) in dengue infection.
NS5	RNF213	57674	24855065	DENV2	Vero, HepG2, 293	Isotopic Differentiation of Interactions as Random or Targeted (I-DIRT) Immunoaffinity Purification followed by Mass spectrometry	Quantitative proteomic analysis of host-virus interactions reveals a role for Golgi brefeldin A resistance factor 1(GBF1) in dengue infection.
NS5	SEC61A1	29927	24855065	DENV2	Vero, HepG2, 293	Isotopic Differentiation of Interactions as Random or Targeted (I-DIRT) Immunoaffinity Purification followed by Mass spectrometry	Quantitative proteomic analysis of host-virus interactions reveals a role for Golgi brefeldin A resistance factor 1(GBF1) in dengue infection.
NS5	SLC16A1	6566	24855065	DENV2	Vero, HepG2, 293	Isotopic Differentiation of Interactions as Random or Targeted (I-DIRT) Immunoaffinity Purification followed by Mass spectrometry	Quantitative proteomic analysis of host-virus interactions reveals a role for Golgi brefeldin A resistance factor 1(GBF1) in dengue infection.
NS5	SLC1A5	6510	24855065	DENV2	Vero, HepG2, 293	Isotopic Differentiation of Interactions as Random or Targeted (I-DIRT) Immunoaffinity Purification followed by Mass spectrometry	Quantitative proteomic analysis of host-virus interactions reveals a role for Golgi brefeldin A resistance factor 1(GBF1) in dengue infection.
NS5	SLC25A1	6576	24855065	DENV2	Vero, HepG2, 293	Isotopic Differentiation of Interactions as Random or Targeted (I-DIRT) Immunoaffinity Purification followed by Mass spectrometry	Quantitative proteomic analysis of host-virus interactions reveals a role for Golgi brefeldin A resistance factor 1(GBF1) in dengue infection.
NS5	SLC25A22	79751	24855065	DENV2	Vero, HepG2, 293	Isotopic Differentiation of Interactions as Random or Targeted (I-DIRT) Immunoaffinity Purification followed by Mass spectrometry	Quantitative proteomic analysis of host-virus interactions reveals a role for Golgi brefeldin A resistance factor 1(GBF1) in dengue infection.
NS5	SLC25A5	292	24855065	DENV2	Vero, HepG2, 293	Isotopic Differentiation of Interactions as Random or Targeted (I-DIRT) Immunoaffinity Purification followed by Mass spectrometry	Quantitative proteomic analysis of host-virus interactions reveals a role for Golgi brefeldin A resistance factor 1(GBF1) in dengue infection.
NS5	SLIRP	81892	24855065	DENV2	Vero, HepG2, 293	Isotopic Differentiation of Interactions as Random or Targeted (I-DIRT) Immunoaffinity Purification followed by Mass spectrometry	Quantitative proteomic analysis of host-virus interactions reveals a role for Golgi brefeldin A resistance factor 1(GBF1) in dengue infection.
NS5	SPTLC1	10558	24855065	DENV2	Vero, HepG2, 293	Isotopic Differentiation of Interactions as Random or Targeted (I-DIRT) Immunoaffinity Purification followed by Mass spectrometry	Quantitative proteomic analysis of host-virus interactions reveals a role for Golgi brefeldin A resistance factor 1(GBF1) in dengue infection.
NS5	SURF4	6836	24855065	DENV2	Vero, HepG2, 293	Isotopic Differentiation of Interactions as Random or Targeted (I-DIRT) Immunoaffinity Purification followed by Mass spectrometry	Quantitative proteomic analysis of host-virus interactions reveals a role for Golgi brefeldin A resistance factor 1(GBF1) in dengue infection.
NS5	TELO2	9894	24855065	DENV2	Vero, HepG2, 293	Isotopic Differentiation of Interactions as Random or Targeted (I-DIRT) Immunoaffinity Purification followed by Mass spectrometry	Quantitative proteomic analysis of host-virus interactions reveals a role for Golgi brefeldin A resistance factor 1(GBF1) in dengue infection.
NS5	TIMM50	92609	24855065	DENV2	Vero, HepG2, 293	Isotopic Differentiation of Interactions as Random or Targeted (I-DIRT) Immunoaffinity Purification followed by Mass spectrometry	Quantitative proteomic analysis of host-virus interactions reveals a role for Golgi brefeldin A resistance factor 1(GBF1) in dengue infection.
NS5	USP9X	8239	24855065	DENV2	Vero, HepG2, 293	Isotopic Differentiation of Interactions as Random or Targeted (I-DIRT) Immunoaffinity Purification followed by Mass spectrometry	Quantitative proteomic analysis of host-virus interactions reveals a role for Golgi brefeldin A resistance factor 1(GBF1) in dengue infection.
NS5	XPO1	7514	24855065	DENV2	Vero, HepG2, 293	Isotopic Differentiation of Interactions as Random or Targeted (I-DIRT) Immunoaffinity Purification followed by Mass spectrometry	Quantitative proteomic analysis of host-virus interactions reveals a role for Golgi brefeldin A resistance factor 1(GBF1) in dengue infection.
NS5	XPO7	23039	24855065	DENV2	Vero, HepG2, 293	Isotopic Differentiation of Interactions as Random or Targeted (I-DIRT) Immunoaffinity Purification followed by Mass spectrometry	Quantitative proteomic analysis of host-virus interactions reveals a role for Golgi brefeldin A resistance factor 1(GBF1) in dengue infection.
NS5	XPOT	11260	24855065	DENV2	Vero, HepG2, 293	Isotopic Differentiation of Interactions as Random or Targeted (I-DIRT) Immunoaffinity Purification followed by Mass spectrometry	Quantitative proteomic analysis of host-virus interactions reveals a role for Golgi brefeldin A resistance factor 1(GBF1) in dengue infection.
NS5	NFKB1	4790	25523420	DENV2	293	Real time PCr, ELISA and ChIP assay	NF-κB is required for dengue virus NS5-induced RANTES expression.
NS5	RANTES	6352	25523420	DENV2	293	Real time PCr, ELISA and ChIP assay	NF-κB is required for dengue virus NS5-induced RANTES expression.
NS5	RELA	5970	25523420	DENV2	293	Real time PCr, ELISA and ChIP assay	NF-κB is required for dengue virus NS5-induced RANTES expression.
NS5	SIAH2	6478	25966194	DENV3	insilico	Computational analysis	Structural modeling and analysis of dengue-mediated inhibition of interferon signaling pathway.
NS5	STAT2	6773	25966194	DENV3	insilico	Computational analysis	Structural modeling and analysis of dengue-mediated inhibition of interferon signaling pathway.
prM	APOA2	336	21281507	DENV2	Bacteria	Bacterial two hybrid assay	Dengue-2 structural proteins associate with human proteins to produce a coagulation and innate immune response biased interactome.
prM	CLIC2	1193	21281507	DENV2	Bacteria	Bacterial two hybrid assay	Dengue-2 structural proteins associate with human proteins to produce a coagulation and innate immune response biased interactome.
prM	CLU	1191	21281507	DENV2	Bacteria	Bacterial two hybrid assay	Dengue-2 structural proteins associate with human proteins to produce a coagulation and innate immune response biased interactome.
prM	HMGXB3	22993	21281507	DENV2	Bacteria	Bacterial two hybrid assay	Dengue-2 structural proteins associate with human proteins to produce a coagulation and innate immune response biased interactome.
prM	MTRNR2L1	100462977	21281507	DENV2	Bacteria	Bacterial two hybrid assay	Dengue-2 structural proteins associate with human proteins to produce a coagulation and innate immune response biased interactome.
prM	NF1	4763	21281507	DENV2	Bacteria	Bacterial two hybrid assay	Dengue-2 structural proteins associate with human proteins to produce a coagulation and innate immune response biased interactome.
prM	OXSR1	9943	21281507	DENV2	Bacteria	Bacterial two hybrid assay	Dengue-2 structural proteins associate with human proteins to produce a coagulation and innate immune response biased interactome.
prM	PEBP1	5037	21281507	DENV2	Bacteria	Bacterial two hybrid assay	Dengue-2 structural proteins associate with human proteins to produce a coagulation and innate immune response biased interactome.
prM	PLG	5340	21281507	DENV2	Bacteria	Bacterial two hybrid assay	Dengue-2 structural proteins associate with human proteins to produce a coagulation and innate immune response biased interactome.
prM	TMEM167B	56900	21281507	DENV2	Bacteria	Bacterial two hybrid assay	Dengue-2 structural proteins associate with human proteins to produce a coagulation and innate immune response biased interactome.
prM	TOB1	10140	21281507	DENV2	Bacteria	Bacterial two hybrid assay	Dengue-2 structural proteins associate with human proteins to produce a coagulation and innate immune response biased interactome.
prM	TSPAN3	10099	21281507	DENV2	Bacteria	Bacterial two hybrid assay	Dengue-2 structural proteins associate with human proteins to produce a coagulation and innate immune response biased interactome.
prM	TUBA1A	7846	21281507	DENV2	Bacteria	Bacterial two hybrid assay	Dengue-2 structural proteins associate with human proteins to produce a coagulation and innate immune response biased interactome.
prM	ZNF365	22891	21281507	DENV2	Bacteria	Bacterial two hybrid assay	Dengue-2 structural proteins associate with human proteins to produce a coagulation and innate immune response biased interactome.
prM	ATP6V0E1	8992	18573235	DENV2	Yeast, HepG2	Y2H assay, Co-immunoprecipitation, inhibition assay	Novel binding between pre-membrane protein and vacuolar ATPase is required for efficient dengue virus secretion.
prM	CLDN1	9076	19962368	DENV2	Yeast, Huh-7 cells	Y2H assay, Knock-down analysis, Co-immunoprecipitation	Novel binding between pre-membrane protein and claudin-1 is required for efficient dengue virus entry.
prM	KDELR1	10945	25753416	DENV1, DENV2, DENV3, DENV4	HeLa, 293T, Vero	siRNA, Co-immunoprecipitation, GST-pull down assay, Fluorescence Microscopy	KDEL Receptors Assist Dengue Virus Exit from the Endoplasmic Reticulum.

## Sheet: Indirect-Interactions
Human Gene symbol	Human gene Entrez Id	Pubmed Id	Serotype	System	Experiment	Title
ACACA	31	20855599	DENV2	Huh-7.5, 293T	siRNA	Dengue virus nonstructural protein 3 redistributes fatty acid synthase to sites of viral replication and increases cellular fatty acid synthesis.
ACTR2	10097	20122152	DENV1, DENV2, DENV3, DENV4	Huh7, HepG2	siRNA	Small interference RNA profiling reveals the essential role of human membrane trafficking genes in mediating the infectious entry of dengue virus.
ADM	133	22908290	DENV2	Huh7, AG129	ISG inhibition assays	Dengue reporter viruses reveal viral dynamics in interferon receptor-deficient mice and sensitivity to interferon effectors in vitro.
AKT1	207	24314632	DENV2	BHK	Western blotting	Dengue virus subgenomic RNA induces apoptosis through the Bcl-2-mediated PI3k/Akt signaling pathway.
ALPK3	57538	25046486	DENV2	Huh7	siRNA	Kinome siRNA screen identifies novel cell-type specific dengue host target genes.
AMPH	273	20122152	DENV1, DENV2, DENV3, DENV4	Huh7, HepG2	siRNA	Small interference RNA profiling reveals the essential role of human membrane trafficking genes in mediating the infectious entry of dengue virus.
ANGPT1	284	23989887	DENV2	HUVEC	SemiqRT-PCR, Western blot analysis	Differential regulation of angiopoietin 1 and angiopoietin 2 during dengue virus infection of human umbilical vein endothelial cells: implications for endothelial hyperpermeability.
ANGPT1	284	26255888	DF, DHF and DSS	Patients sera	ELISA	Host biomarkers are associated with progression to dengue haemorrhagic fever: a nested case-control study
ANGPT2	285	23989887	DENV2	HUVEC	SemiqRT-PCR, Western blot analysis	Differential regulation of angiopoietin 1 and angiopoietin 2 during dengue virus infection of human umbilical vein endothelial cells: implications for endothelial hyperpermeability.
ANGPT2	285	24928471	Patients with and without plasma leakage	Patients sera	ELISA	Serum angiopoietin-2 and soluble VEGF receptor 2 are surrogate markers for plasma leakage in patients with acute dengue virus infection.
ANGPTL3	27329	26255888	DF, DHF and DSS	Patients sera	ELISA	Host biomarkers are associated with progression to dengue haemorrhagic fever: a nested case-control study
ANLN	54443	14981762	DENV2	ECV304	DD-RT-PCR, Real time PCR	Differential display RT-PCR analysis of ECV304 endothelial-like cells infected with dengue virus type 2 reveals messenger RNA expression profiles of multiple human genes involved in known and novel roles.
AP1B1	162	20122152	DENV1, DENV2, DENV3, DENV4	Huh7, HepG2	siRNA	Small interference RNA profiling reveals the essential role of human membrane trafficking genes in mediating the infectious entry of dengue virus.
AP1M1	8907	26090672	DENV1, DENV2, DENV3, DENV4	Huh7	siRNA, Binding assay, Real time RT-PCR	Adaptor Protein 1A Facilitates Dengue Virus Replication.
AP2A1	160	19295646	DENV2	ECV304, Vero	Western blot, Confocal Laser Scanning Microscopy	Entry of dengue virus serotype 2 into ECV304 cells depends on clathrin-dependent endocytosis, but not on caveolae-dependent endocytosis.
AP2A1	160	20122152	DENV1, DENV2, DENV3, DENV4	Huh7, HepG2	siRNA	Small interference RNA profiling reveals the essential role of human membrane trafficking genes in mediating the infectious entry of dengue virus.
AP2B1	163	20122152	DENV1, DENV2, DENV3, DENV4	Huh7, HepG2	siRNA	Small interference RNA profiling reveals the essential role of human membrane trafficking genes in mediating the infectious entry of dengue virus.
AP2M1	1173	25046486	DENV2	Huh7	siRNA	Kinome siRNA screen identifies novel cell-type specific dengue host target genes.
APOA1	335	23894648	DENV2	Vero, AD-293, Huh-7, HepG2	Co-immunoprecipitation, siRNA, FACs analysis after virus absorption	Human apolipoprotein A-I is associated with dengue virus and enhances virus infection through SR-BI.
APOE	348	26161501			Structure and sequence comparison	Understanding Dengue Virus Capsid Protein Interaction with Key Biological Targets.
ARPC1B	10095	20122152	DENV1, DENV2, DENV3, DENV4	Huh7, HepG2	siRNA	Small interference RNA profiling reveals the essential role of human membrane trafficking genes in mediating the infectious entry of dengue virus.
ARPC3	10094	20122152	DENV1, DENV2, DENV3, DENV4	Huh7, HepG2	siRNA	Small interference RNA profiling reveals the essential role of human membrane trafficking genes in mediating the infectious entry of dengue virus.
ARRB1	408	20122152	DENV1, DENV2, DENV3, DENV4	Huh7, HepG2	siRNA	Small interference RNA profiling reveals the essential role of human membrane trafficking genes in mediating the infectious entry of dengue virus.
ATF6	22926	17888185	DENV1, DENV2	A549	Western blot, RT-PCR, inhibition assays	Dengue virus serotype infection specifies the activation of the unfolded protein response.
ATF6	22926	20855599	DENV2	Huh-7.5, 293T	siRNA	Dengue virus nonstructural protein 3 redistributes fatty acid synthase to sites of viral replication and increases cellular fatty acid synthesis.
ATF6	22926	21385877	DENV2	Human fibrosarcoma 2fTGH cells, MEF	Western blottting	Dengue virus modulates the unfolded protein response in a time-dependent manner.
ATG12	9140	20158392	ADE DENV2	THP-1	Western blotting	Mechanisms of immune evasion induced by a complex of dengue virus and preexisting enhancing antibodies.
ATG12	9140	20855599	DENV2	Huh-7.5, 293T	siRNA	Dengue virus nonstructural protein 3 redistributes fatty acid synthase to sites of viral replication and increases cellular fatty acid synthesis.
ATG5	9474	18353420	DENV2	MEF, Huh7	Transmission electron microscopy, Immunofluorescence microscopy, Western blot, FACS	Autophagic machinery activated by dengue virus enhances virus replication
ATP6AP1	537	19396146	DENV2	Huh7	siRNA	Discovery of insect and human dengue virus host factors.
ATP6AP1	537	26212330	DENV2, DENV3, DENV4	HeLa	Western blot, siRNA	RNASEK Is a V-ATPase-Associated Factor Required for Endocytosis and the Replication of Rhinovirus, Influenza A Virus, and Dengue Virus.
ATP6AP2	10159	19396146	DENV2	Huh7	siRNA	Discovery of insect and human dengue virus host factors.
ATP6V0A1	535	20122152	DENV1, DENV2, DENV3, DENV4	Huh7, HepG2	siRNA	Small interference RNA profiling reveals the essential role of human membrane trafficking genes in mediating the infectious entry of dengue virus.
ATP6V0B	533	19396146	DENV2	Huh7	siRNA	Discovery of insect and human dengue virus host factors.
ATP6V0C	527	19396146	DENV2	Huh7	siRNA	Discovery of insect and human dengue virus host factors.
ATP6V0D1	9114	19396146	DENV2	Huh7	siRNA	Discovery of insect and human dengue virus host factors.
ATP6V1B1	525	19396146	DENV2	Huh7	siRNA	Discovery of insect and human dengue virus host factors.
ATP6V1B2	526	19396146	DENV2	Huh7	siRNA	Discovery of insect and human dengue virus host factors.
ATP6V1C2	245973	19396146	DENV2	Huh7	siRNA	Discovery of insect and human dengue virus host factors.
ATP6V1G2	534	19396146	DENV2	Huh7	siRNA	Discovery of insect and human dengue virus host factors.
ATP6V1G3	127124	19396146	DENV2	Huh7	siRNA	Discovery of insect and human dengue virus host factors.
ATP6V1H	51606	19396146	DENV2	Huh7	siRNA	Discovery of insect and human dengue virus host factors.
AVPR1B	553	25046486	DENV2	Huh7	siRNA	Kinome siRNA screen identifies novel cell-type specific dengue host target genes.
AXL	558	23084921	DENV1, DENV2, DENV3, DENV4	293T, CHO745, Cos-7, A549, Vero, Huh7 5.1	Cell-Binding Assay, siRNA, Immunofluroscence assay	The TIM and TAM families of phosphatidylserine receptors mediate dengue virus entry.
BAX	581	18606243	DENV1	BHK, Huh-7, Vero	TUNEL assay, FACS, Western blot, Mutational analysis	Induction of p53-dependent and mitochondria-mediated cell death pathway by dengue virus infection of human and animal cells.
BAX	581	26244642	DENV2	HUVEC, EA.hy926	Western blotting	IFI6 Inhibits Apoptosis via Mitochondrial-Dependent Pathway in Dengue Virus 2 Infected Vascular Endothelial Cells.
BBC3	27113	24034452	DENV2	HepG2	Real time PCR	Dengue 2 infection of HepG2 liver cells results in endoplasmic reticulum stress and induction of multiple pathways of cell death.
BCL2	596	24314632	DENV2	BHK	Western blotting	Dengue virus subgenomic RNA induces apoptosis through the Bcl-2-mediated PI3k/Akt signaling pathway.
BCL2	596	26244642	DENV2	HUVEC, EA.hy926	Western blotting	IFI6 Inhibits Apoptosis via Mitochondrial-Dependent Pathway in Dengue Virus 2 Infected Vascular Endothelial Cells.
BCL2L1	598	25521078	DENV2	Human Monocyte derived Dendritic cells	Quantitative real-time PCR	Cellular Oxidative Stress Response Controls the Antiviral and Apoptotic Programs in Dengue Virus-Infected Dendritic Cells
BST2	684	23236425	DENV2	Huh7	Overexpression studies	BST2/tetherin inhibits dengue virus release from human hepatoma cells.
C5	727	26255888	DF, DHF and DSS	Patients sera	ELISA	Host biomarkers are associated with progression to dengue haemorrhagic fever: a nested case-control study
CAMK1	8536	20122152	DENV1, DENV2, DENV3, DENV4	Huh7, HepG2	siRNA	Small interference RNA profiling reveals the essential role of human membrane trafficking genes in mediating the infectious entry of dengue virus.
CAPRIN1	4076	24992036	DENV2	HuH-7	siRNA, Western blotting,	G3BP1, G3BP2 and CAPRIN1 are required for translation of interferon stimulated mRNAs and are targeted by a dengue virus non-coding RNA.
CASP1	834	19382257	DENV1	p53-deficient H1299, Huh7	siRNA, Real time RT-PCR	Gene expression profiling by microarray analysis reveals an important role for caspase-1 in dengue virus-induced p53-mediated apoptosis.
CASP1	834	23152543	DENV2	Human Monocyte derived macrophages (MDMs)	Inhibition studies	CLEC5A is critical for dengue virus-induced inflammasome activation in human macrophages.
CASP1	834	23884363	DENV2	Primary human monocytes	qRT-PCR, Western blotting	Dengue virus-infected human monocytes trigger late activation of caspase-1, which mediates pro-inflammatory IL-1β secretion and pyroptosis.
CASP3	836	20572077	DENV2	HUVEC	Western blot	FasL/Fas pathway is involved in dengue virus induced apoptosis of the vascular endothelial cells.
CASP3	836	23867824	DENV2	HepG2	Western blotting	Role of cathepsin B in dengue virus-mediated apoptosis.
CASP3	836	24314632	DENV2	BHK	Western blotting	Dengue virus subgenomic RNA induces apoptosis through the Bcl-2-mediated PI3k/Akt signaling pathway.
CASP3	836	26244642	DENV2	HUVEC, EA.hy926	Western blotting	IFI6 Inhibits Apoptosis via Mitochondrial-Dependent Pathway in Dengue Virus 2 Infected Vascular Endothelial Cells.
CASP8	841	20572077	DENV2	HUVEC	Western blot	FasL/Fas pathway is involved in dengue virus induced apoptosis of the vascular endothelial cells.
CASP8	841	26244642	DENV2	HUVEC, EA.hy926	Western blotting	IFI6 Inhibits Apoptosis via Mitochondrial-Dependent Pathway in Dengue Virus 2 Infected Vascular Endothelial Cells.
CASP9	842	23867824	DENV2	HepG2	Western blotting	Role of cathepsin B in dengue virus-mediated apoptosis.
CASP9	842	26244642	DENV2	HUVEC, EA.hy926	Western blotting	IFI6 Inhibits Apoptosis via Mitochondrial-Dependent Pathway in Dengue Virus 2 Infected Vascular Endothelial Cells.
CBL	867	20122152	DENV1, DENV2, DENV3, DENV4	Huh7, HepG2	siRNA	Small interference RNA profiling reveals the essential role of human membrane trafficking genes in mediating the infectious entry of dengue virus.
CBLB	868	20122152	DENV1, DENV2, DENV3, DENV4	Huh7, HepG2	siRNA	Small interference RNA profiling reveals the essential role of human membrane trafficking genes in mediating the infectious entry of dengue virus.
CBLC	23624	20122152	DENV1, DENV2, DENV3, DENV4	Huh7, HepG2	siRNA	Small interference RNA profiling reveals the essential role of human membrane trafficking genes in mediating the infectious entry of dengue virus.
CCL2	6347	15611263	DENV2	Human microvascular endothelial cell line-1 HMEC-1,	Western blot, FACs, ELISA, RT-PCR	Expression of Cytokine, Chemokine, and Adhesion Molecules during Endothelial Cell Activation Induced by Antibodies against Dengue Virus Nonstructural Protein 1
CCL3	6348	16103156	DENV2	HepG2, Monocyte-derived dendritic cells (MDDCs)	ELISA, Quantitative RT-PCR	Dengue virus nonstructural protein NS5 induces interleukin-8 transcription and secretion.
CCL4	6351	16103156	DENV2	HepG2, Monocyte-derived dendritic cells (MDDCs)	ELISA, Quantitative RT-PCR	Dengue virus nonstructural protein NS5 induces interleukin-8 transcription and secretion.
CCL5	6352	9834124	DENV2, DSS	EA.hy926, Patient's sera	RT-PCR, ELISA	Dengue virus infection of human endothelial cells leads to chemokine production, complement activation, and apoptosis.
CCL5	6352	11022000	DENV2, DENV3	Chang liver cells, HuH7, Hep3B	ELISA, RT-PCR	Involvement of oxidative stress, NF-IL-6, and RANTES expression in dengue-2-virus-infected human liver cells.
CCL5	6352	16103156	DENV2	HepG2, Monocyte-derived dendritic cells (MDDCs)	ELISA, Quantitative RT-PCR	Dengue virus nonstructural protein NS5 induces interleukin-8 transcription and secretion.
CCL5	6352	21893572	DENV2	HepG2	ELISA	Janus kinase/signal transducer and activator of transcription 3 signaling pathway is crucial in chemokine production from hepatocytes infected by dengue virus.
CCL5	6352	22496214	DENV4	HUVEC	ELISA	Endothelial cells elicit immune-enhancing responses to dengue virus infection.
CCL5	6352	25521078	DENV2	Human Monocyte derived Dendritic cells	Inhibition followed by Fluidigm BioMark high throughput qPCR assay	Cellular Oxidative Stress Response Controls the Antiviral and Apoptotic Programs in Dengue Virus-Infected Dendritic Cells
CCL5	6352	26130295	DENV2, DENV4	Human dermal fibroblasts (HDFs), Human dermal microvascular endothelial cells (HDMECs)	Cytokine/chemokine quantification assay	Soluble mediators produced by the crosstalk between microvascular endothelial cells and dengue-infected primary dermal fibroblasts inhibit dengue virus replication and increase leukocyte transmigration
CCR5	1234	25939314	DENV2	THP1, C57BL/6	qRT-PCR, ELISA, Immunofluorescence microscopy	Dengue virus requires the CC-chemokine receptor CCR5 for replication and infection development.
CCR7	1236	19862774	DENV2	Human Monocyte-derived Dendritic cells	FACS	Triggering of DC migration by dengue virus stimulation of COX-2-dependent signaling cascades in vitro highlights the significance of these cascades beyond inflammation.
CD14	929	10074110	DENV2	Primary Human Monocytes and Macrophages	Inhibition studies against entry using Monoclonal antibodies	Bacterial lipopolysaccharide inhibits dengue virus infection of primary human monocytes/macrophages by blockade of virus entry via a CD14-dependent mechanism.
CD14	929	22140591	DENV2	Human monocytes from PBMCs of healthy donors	siRNA	Inhibition of dengue virus entry and multiplication into monocytes using RNA interference.
CD4	920	1939640	DF, DHF	Patients sera	ELISA	Activation of T lymphocytes in dengue virus infections. High levels of soluble interleukin 2 receptor, soluble CD4, soluble CD8, interleukin 2, and interferon-gamma in sera of children with dengue.
CD73	4907	23149581	DENV2	HUVEC	qRT-PCR, Trans-endothelial electrical resistance assays, FACS	Dengue virus type 2 modulates endothelial barrier function through CD73.
CD8	925	1939640	DF, DHF	Patients sera	ELISA	Activation of T lymphocytes in dengue virus infections. High levels of soluble interleukin 2 receptor, soluble CD4, soluble CD8, interleukin 2, and interferon-gamma in sera of children with dengue.
CD9	928	22908290	DENV2	Huh7, AG129	ISG inhibition assays	Dengue reporter viruses reveal viral dynamics in interferon receptor-deficient mice and sensitivity to interferon effectors in vitro.
CDC27	996	14981762	DENV2	ECV304	DD-RT-PCR, Real time PCR	Differential display RT-PCR analysis of ECV304 endothelial-like cells infected with dengue virus type 2 reveals messenger RNA expression profiles of multiple human genes involved in known and novel roles.
CDC42	998	19710257	DENV2	HMEC-1	Virus binding assay, FACS, Time-lapse fluorescent microscopy	Cross-talk between Rac1 and Cdc42 GTPases regulates formation of filopodia required for dengue virus type-2 entry into HMEC-1 cells.
CDC42	998	20855599	DENV2	Huh-7.5, 293T	siRNA	Dengue virus nonstructural protein 3 redistributes fatty acid synthase to sites of viral replication and increases cellular fatty acid synthesis.
CDH1	999	23616663	DENV4	U937, MDCK	Immunofluorescence microscopy, Western blot, Transepithelial electrical resistance assay, Transmission electron microscopy, Vascular permeability assay	The cytokine response of U937-derived macrophages infected through antibody-dependent enhancement of dengue virus disrupts cell apical-junction complexes and increases vascular permeability.
CDH5	1003	17028575	DENV2	Human Monocyte-derived immature dendritic cells, HUVEC	Protein array, In vitro permeability assay, In vivo vascular permeability enhancement assay, Immunofluorescence microscopy	Dengue-virus-infected dendritic cells trigger vascular leakage through metalloproteinase overproduction
CDH5	1764	19281230	DENV2	EA.hy926	Western blot, Confocal Laser Scanning Microscopy	Alterations in actin cytoskeletal assembly and junctional protein complexes in human endothelial cells induced by dengue virus infection and mimicry of leukocyte transendothelial migration
CDH5	1003	26130295	DENV2, DENV4	Human dermal fibroblasts (HDFs), Human dermal microvascular endothelial cells (HDMECs)	Leukocyte transendothelial migration assay, FACS,	Soluble mediators produced by the crosstalk between microvascular endothelial cells and dengue-infected primary dermal fibroblasts inhibit dengue virus replication and increase leukocyte transmigration
CDKN3	1033	25046486	DENV2	Huh7	siRNA	Kinome siRNA screen identifies novel cell-type specific dengue host target genes.
CEBPB	1051	11022000	DENV2, DENV3	Chang liver cells, HuH7, Hep3B	EMSA	Involvement of oxidative stress, NF-IL-6, and RANTES expression in dengue-2-virus-infected human liver cells.
CEBPB	1051	20158392	ADE DENV2	THP-1	cDNA array	Mechanisms of immune evasion induced by a complex of dengue virus and preexisting enhancing antibodies.
CFD	1675	24861695	DF, DHF	Patients sera	ELISA	Elevated levels of full-length and thrombin-cleaved osteopontin during acute dengue virus infection are associated with coagulation abnormalities.
CFD	1675	26255888	DF, DHF and DSS	Patients sera	ELISA	Host biomarkers are associated with progression to dengue haemorrhagic fever: a nested case-control study
CHI3L1	1116	26255888	DF, DHF and DSS	Patients sera	ELISA	Host biomarkers are associated with progression to dengue haemorrhagic fever: a nested case-control study
CHRNA2	1135	19396146	DENV2	Huh7	siRNA	Discovery of insect and human dengue virus host factors.
CIB2	10518	20122152	DENV1, DENV2, DENV3, DENV4	Huh7, HepG2	siRNA	Small interference RNA profiling reveals the essential role of human membrane trafficking genes in mediating the infectious entry of dengue virus.
CISH	1154	25462335			Modeling	On the modelling and analysis of the regulatory network of dengue virus pathogenesis and clearance.
CLEC5A	23601	18496526	DENV1, DENV2, DENV3, DENV4	Human Macrophage, Mice	Western blot, Confocal microscopy, FACS, ELISA	CLEC5A is critical for dengue-virus-induced lethal disease
CLEC5A	23601	23152543	DENV2	Human Monocyte derived macrophages (MDMs)	Western blot, Co-immunoprecipitation	CLEC5A is critical for dengue virus-induced inflammasome activation in human macrophages.
CLTB	1212	20122152	DENV1, DENV2, DENV3, DENV4	Huh7, HepG2	siRNA	Small interference RNA profiling reveals the essential role of human membrane trafficking genes in mediating the infectious entry of dengue virus.
CLTC	1213	20122152	DENV1, DENV2, DENV3, DENV4	Huh7, HepG2	siRNA	Small interference RNA profiling reveals the essential role of human membrane trafficking genes in mediating the infectious entry of dengue virus.
CLTC	1213	22140591	DENV2	Human monocytes from PBMCs of healthy donors	siRNA	Inhibition of dengue virus entry and multiplication into monocytes using RNA interference.
CLTC	1213	22457813	DENV2	HepG2	siRNA	RNA interference mediated inhibition of dengue virus multiplication and entry in HepG2 cells.
CNOT2	4848	19396146	DENV2	Huh7	siRNA	Discovery of insect and human dengue virus host factors.
COPB2	9276	25046486	DENV2	Huh7	siRNA	Kinome siRNA screen identifies novel cell-type specific dengue host target genes.
CRP	1401	19733377	DENV2, DENV3, DENV4	Serum of DF and DHF patient	ELISA	Increment of interleukin 6, tumour necrosis factor alpha, nitric oxide, C-reactive protein and apoptosis in dengue.
CRP	1401	20158392	ADE DENV2	THP-1	cDNA array	Mechanisms of immune evasion induced by a complex of dengue virus and preexisting enhancing antibodies.
CRP	1401	26255888	DF, DHF and DSS	Patients sera	ELISA	Host biomarkers are associated with progression to dengue haemorrhagic fever: a nested case-control study
CSF2RB	1439	20158392	ADE DENV2	THP-1	cDNA array	Mechanisms of immune evasion induced by a complex of dengue virus and preexisting enhancing antibodies.
CSNK1D	1453	25046486	DENV2	Huh7	siRNA	Kinome siRNA screen identifies novel cell-type specific dengue host target genes.
CTSB	1508	23867824	DENV2	HepG2	siRNA, Real time RT-PCR, Lysosome permeability assay	Role of cathepsin B in dengue virus-mediated apoptosis.
CTSD	1509	19264601	DENV3	HepG2	Co-localization studies through Confocal microscopy	A role for autophagolysosomes in dengue virus 3 production in HepG2 cells.
CTSS	1520	23867824	DENV2	HepG2	siRNA, Real time RT-PCR, Lysosome permeability assay	Role of cathepsin B in dengue virus-mediated apoptosis.
CXCL10	3627	16920957	DENV2	BHK-21, Hepa1-6	Real-time PCR, ELISA	Dengue virus induces expression of CXC chemokine ligand 10/IFN-gamma-inducible protein 10, which competitively inhibits viral binding to cell surface heparan sulfate.
CXCL10	3627	18941175	DENV2	Human Monocyte derived Dendritic Cells, T cells, HUVEC	ELISA	A Complex Interplay among Virus, Dendritic Cells, T Cells, and Cytokines in Dengue Virus Infections
CXCL10	3627	22496214	DENV4	HUVEC	ELISA	Endothelial cells elicit immune-enhancing responses to dengue virus infection.
CXCL10	3627	25521078	DENV2	Human Monocyte derived Dendritic cells	Quantitative real-time PCR	Cellular Oxidative Stress Response Controls the Antiviral and Apoptotic Programs in Dengue Virus-Infected Dendritic Cells
CXCL10	3627	26255888	DF, DHF and DSS	Patients sera	ELISA	Host biomarkers are associated with progression to dengue haemorrhagic fever: a nested case-control study
CXCL11	6373	18941175	DENV2	Human Monocyte derived Dendritic Cells, T cells, HUVEC	ELISA	A Complex Interplay among Virus, Dendritic Cells, T Cells, and Cytokines in Dengue Virus Infections
CXCL11	6373	22496214	DENV4	HUVEC	ELISA	Endothelial cells elicit immune-enhancing responses to dengue virus infection.
CXCL8	3576	9834124	DENV2, DSS	EA.hy926, Patient's sera	RT-PCR, ELISA	Dengue virus infection of human endothelial cells leads to chemokine production, complement activation, and apoptosis.
CXCL8	3576	15218164	DENV2	Human dermal microvascular endothelial cell line HMEC-1	FACs, Permeability measurements, ELISA	IL8 release, tight junction and cytoskeleton dynamic reorganization conducive to permeability increase are induced by dengue virus infection of microvascular endothelial monolayers.
CXCL8	3576	15304247	DF Grade I, DF Grade II	Serial blood samples	ELISA	Systemic host inflammatory and coagulation response in the Dengue virus primo-infection
CXCL8	3576	15611263	DENV2	Human microvascular endothelial cell line-1 HMEC-1,	Western blot, FACs, ELISA, RT-PCR	Expression of Cytokine, Chemokine, and Adhesion Molecules during Endothelial Cell Activation Induced by Antibodies against Dengue Virus Nonstructural Protein 1
CXCL8	3576	16544247	DENV2	293A, HepG2	ELISA, Inhibition assay	Cell Type–Specific Mechanisms of Interleukin-8 Induction by Dengue Virus and Differential Response to Drug Treatment
CXCL8	3576	18449425	DENV2	HUVEC	ELISA	Crosstalk between coagulation and inflammation during Dengue virus infection
CXCL8	3576	21893572	DENV2	HepG2	ELISA	Janus kinase/signal transducer and activator of transcription 3 signaling pathway is crucial in chemokine production from hepatocytes infected by dengue virus.
CXCL9	4283	18941175	DENV2	Human Monocyte derived Dendritic Cells, T cells, HUVEC	ELISA	A Complex Interplay among Virus, Dendritic Cells, T Cells, and Cytokines in Dengue Virus Infections
DCST2	127579	19396146	DENV2	Huh7	siRNA	Discovery of insect and human dengue virus host factors.
DDIT3	1649	21385877	DENV2	Human fibrosarcoma 2fTGH cells, MEF	Western blottting	Dengue virus modulates the unfolded protein response in a time-dependent manner.
DDIT3	1649	24034452	DENV2	HepG2	Real time PCR	Dengue 2 infection of HepG2 liver cells results in endoplasmic reticulum stress and induction of multiple pathways of cell death.
DDX3X	1654	25437271	DENV2	293T	Real-time RT-PCR	DEAD-box RNA helicase DDX3X inhibits DENV replication via regulating type one interferon pathway.
DDX58	23586	16182584	DENV2	A549	Western blotting	Flavivirus induces interferon-beta gene expression through a pathway involving RIG-I-dependent IRF-3 and PI3K-dependent NF-kappaB activation.
DDX58	23586	20158392	ADE DENV2	THP-1	Western blotting	Mechanisms of immune evasion induced by a complex of dengue virus and preexisting enhancing antibodies.
DDX58	23586	21113677	DENV2, DENV4	A549, BHK-21	siRNA, RT-PCR, Western blot	Retinoic acid inducible gene-I and melanoma differentiation-associated gene 5 are induced but not essential for dengue virus induced type I interferon response.
DDX58	23586	21245912	DENV1	Macrophages, Huh-7 and shRIG-I cells	RT-PCR, siRNA, Western blot, ELISA, Immunofluorescence microscopy	RIG-I, MDA5 and TLR3 synergistically play an important role in restriction of dengue virus infection.
DDX58	23586	22908290	DENV2	Huh7, AG129	ISG inhibition assays	Dengue reporter viruses reveal viral dynamics in interferon receptor-deficient mice and sensitivity to interferon effectors in vitro.
DDX58	23586	23089253	DENV2	Human brain microvascular endothelial cells (HBMEC)	Real time RT-PCR, siRNA	Essential role of RIG-I in the activation of endothelial cells by dengue virus.
DDX58	23586	24992036	DENV2	HuH-7	Real-time RT-PCR, Western blotting, ISRE-luciferase reporter assay	G3BP1, G3BP2 and CAPRIN1 are required for translation of interferon stimulated mRNAs and are targeted by a dengue virus non-coding RNA.
DDX58	23586	25521078	DENV2	Human Monocyte derived Dendritic cells	Inhibition followed by Fluidigm BioMark high throughput qPCR assay	Cellular Oxidative Stress Response Controls the Antiviral and Apoptotic Programs in Dengue Virus-Infected Dendritic Cells
DIAPH1	1729	20122152	DENV1, DENV2, DENV3, DENV4	Huh7, HepG2	siRNA	Small interference RNA profiling reveals the essential role of human membrane trafficking genes in mediating the infectious entry of dengue virus.
DIAPH1	1729	20855599	DENV2	Huh-7.5, 293T	siRNA	Dengue virus nonstructural protein 3 redistributes fatty acid synthase to sites of viral replication and increases cellular fatty acid synthesis.
DIAPH3	81624	19396146	DENV2	Huh7	siRNA	Discovery of insect and human dengue virus host factors.
DLL1	28514	25041739	DENV1, DENV2, DENV3	Macrophages and Dendritic cells from differentiating Human PBMCs and CD4+ T cells	Real time RT-PCR	Dengue virus up-regulates expression of notch ligands Dll1 and Dll4 through interferon-β signalling pathway.
DLL4	54567	25041739	DENV1, DENV2, DENV3	Macrophages and Dendritic cells from differentiating Human PBMCs and CD4+ T cells	Real time RT-PCR	Dengue virus up-regulates expression of notch ligands Dll1 and Dll4 through interferon-β signalling pathway.
DNM1	1759	20122152	DENV1, DENV2, DENV3, DENV4	Huh7, HepG2	siRNA	Small interference RNA profiling reveals the essential role of human membrane trafficking genes in mediating the infectious entry of dengue virus.
DNM2	1785	20122152	DENV1, DENV2, DENV3, DENV4	Huh7, HepG2	siRNA	Small interference RNA profiling reveals the essential role of human membrane trafficking genes in mediating the infectious entry of dengue virus.
DNM2	1785	22140591	DENV2	Human monocytes from PBMCs of healthy donors	siRNA	Inhibition of dengue virus entry and multiplication into monocytes using RNA interference.
DNM2	1785	22457813	DENV2	HepG2	siRNA	RNA interference mediated inhibition of dengue virus multiplication and entry in HepG2 cells.
DRD4	1815	24599995	DENV1, DENV2, DENV3, DENV4	293, HeLa	Inhibition assay, siRNA	Inhibition of dengue virus replication by a class of small-molecule compounds that antagonize dopamine receptor d4 and downstream mitogen-activated protein kinase signaling.
DST	667	14981762	DENV2	ECV304	DD-RT-PCR, Real time PCR	Differential display RT-PCR analysis of ECV304 endothelial-like cells infected with dengue virus type 2 reveals messenger RNA expression profiles of multiple human genes involved in known and novel roles.
EDN1	1906	24928471	Patients with and without plasma leakage	Patient blood samples	ELISA	Serum angiopoietin-2 and soluble VEGF receptor 2 are surrogate markers for plasma leakage in patients with acute dengue virus infection.
EEA1	8411	20122152	DENV1, DENV2, DENV3, DENV4	Huh7, HepG2	siRNA	Small interference RNA profiling reveals the essential role of human membrane trafficking genes in mediating the infectious entry of dengue virus.
EGR1	1958	14981762	DENV2	ECV304	DD-RT-PCR, Real time PCR	Differential display RT-PCR analysis of ECV304 endothelial-like cells infected with dengue virus type 2 reveals messenger RNA expression profiles of multiple human genes involved in known and novel roles.
EIF2AK1	27102	25046486	DENV2	Huh7	siRNA	Kinome siRNA screen identifies novel cell-type specific dengue host target genes.
EIF2AK3	9451	21385877	DENV2	Human fibrosarcoma 2fTGH cells, MEF	Western blottting	Dengue virus modulates the unfolded protein response in a time-dependent manner.
EIF2AK3	9451	25046486	DENV2	Huh7	siRNA	Kinome siRNA screen identifies novel cell-type specific dengue host target genes.
EIF2S1	1965	17888185	DENV1, DENV2	A549	Western blot, RT-PCR, inhibition assays	Dengue virus serotype infection specifies the activation of the unfolded protein response.
EIF2S1	1965	21385877	DENV2	Human fibrosarcoma 2fTGH cells, MEF	Western blottting	Dengue virus modulates the unfolded protein response in a time-dependent manner.
EIF2S1	1965	26350772	DENV2	A549	Western blot	Dengue virus infection induces formation of G3BP1 granules in human lung epithelial cells.
EIF3A	8661	14981762	DENV2	ECV304	DD-RT-PCR, Real time PCR	Differential display RT-PCR analysis of ECV304 endothelial-like cells infected with dengue virus type 2 reveals messenger RNA expression profiles of multiple human genes involved in known and novel roles.
EIF5B	9669	14981762	DENV2	ECV304	DD-RT-PCR, Real time PCR	Differential display RT-PCR analysis of ECV304 endothelial-like cells infected with dengue virus type 2 reveals messenger RNA expression profiles of multiple human genes involved in known and novel roles.
ELP2	55250	14981762	DENV2	ECV304	DD-RT-PCR, Real time PCR	Differential display RT-PCR analysis of ECV304 endothelial-like cells infected with dengue virus type 2 reveals messenger RNA expression profiles of multiple human genes involved in known and novel roles.
ENG	2022	26255888	DF, DHF and DSS	Patients sera	ELISA	Host biomarkers are associated with progression to dengue haemorrhagic fever: a nested case-control study
ENO1	2023	25171719	DENV2	HepG2	Real-time PCR, 2D-PAGE, western blot, ELISA	Modulation of α-enolase post-translational modifications by dengue virus: increased secretion of the basic isoforms in infected hepatic cells.
EPAS1	2034	25521078	DENV2	Human Monocyte derived Dendritic cells	Enrichment analysis of transcription factors activating the DEGs	Cellular Oxidative Stress Response Controls the Antiviral and Apoptotic Programs in Dengue Virus-Infected Dendritic Cells
EPN1	29924	20122152	DENV1, DENV2, DENV3, DENV4	Huh7, HepG2	siRNA	Small interference RNA profiling reveals the essential role of human membrane trafficking genes in mediating the infectious entry of dengue virus.
EPN2	22905	20122152	DENV1, DENV2, DENV3, DENV4	Huh7, HepG2	siRNA	Small interference RNA profiling reveals the essential role of human membrane trafficking genes in mediating the infectious entry of dengue virus.
EPS15	2060	19295646	DENV2	ECV304, Vero	Co-localization studies through Confocal microscopy, Inhibition studies, siRNA	Entry of dengue virus serotype 2 into ECV304 cells depends on clathrin-dependent endocytosis, but not on caveolae-dependent endocytosis.
EPS15	2060	20122152	DENV1, DENV2, DENV3, DENV4	Huh7, HepG2	siRNA	Small interference RNA profiling reveals the essential role of human membrane trafficking genes in mediating the infectious entry of dengue virus.
ERC1	23085	20122152	DENV1, DENV2, DENV3, DENV4	Huh7, HepG2	siRNA	Small interference RNA profiling reveals the essential role of human membrane trafficking genes in mediating the infectious entry of dengue virus.
ERN1	2081	21385877	DENV2	Human fibrosarcoma 2fTGH cells, MEF	Western blottting	Dengue virus modulates the unfolded protein response in a time-dependent manner.
ETNK2	55224	25046486	DENV2	Huh7	siRNA	Kinome siRNA screen identifies novel cell-type specific dengue host target genes.
EXOC7	23265	21034848	DENV2	HepG2	Real time RT-PCR, Immuno-fluorescence assay, Transmission electron microscopy	EXO70 protein influences dengue virus secretion.
F2	2147	24861695	DF, DHF	Patients sera	ELISA	Elevated levels of full-length and thrombin-cleaved osteopontin during acute dengue virus infection are associated with coagulation abnormalities.
F2R	2149	18449425	DENV2	HUVEC	Prothrombin activation assay, FACs	Crosstalk between coagulation and inflammation during Dengue virus infection
F3	2152	18449425	DENV2	HUVEC	Prothrombin activation assay, FACs	Crosstalk between coagulation and inflammation during Dengue virus infection
FAS	355	20572077	DENV2	HUVEC	qPCR, FACS	FasL/Fas pathway is involved in dengue virus induced apoptosis of the vascular endothelial cells.
FASL	356	20572077	DENV2	HUVEC	qPCR, FACS	FasL/Fas pathway is involved in dengue virus induced apoptosis of the vascular endothelial cells.
FASTKD5	60493	19396146	DENV2	Huh7	siRNA	Discovery of insect and human dengue virus host factors.
FCGR3A	2214	20113369	DENV2	Patient blood samples, PBMCs	FACS	Differential regulation of toll-like receptor-2, toll-like receptor-4, CD16 and human leucocyte antigen-DR on peripheral blood monocytes during mild and severe dengue fever.
FDFT1	2222	19419745	DENV2	A549, K562	siRNA, Inhibition studies	Cholesterol biosynthesis modulation regulates dengue viral replication.
FES	2242	25046486	DENV2	Huh7	siRNA	Kinome siRNA screen identifies novel cell-type specific dengue host target genes.
FH	2271	19396146	DENV2	Huh7	siRNA	Discovery of insect and human dengue virus host factors.
FOS	2353	16544247	DENV2	293A, HepG2	Inhibition assay, Luciferase reporter gene assay	Cell Type–Specific Mechanisms of Interleukin-8 Induction by Dengue Virus and Differential Response to Drug Treatment
FYN	2534	23616652	DENV2	Huh7, 293T	Inhibition studies, siRNA	The Small Molecules AZD0530 and Dasatinib Inhibit Dengue Virus RNA Replication via Fyn Kinase
FYN	2534	26039671	DENV2	Vero	Molecular modeling, Autodock Vina docking, Glide docking, In vitro Kinase inhibition assay, viral inhibition by RT-PCR	Discovery of Multitarget Antivirals Acting on Both the Dengue Virus NS5-NS3 Interaction and the Host Src/Fyn Kinases
G3BP1	10146	24992036	DENV2	HuH-7	siRNA, Western blotting,	G3BP1, G3BP2 and CAPRIN1 are required for translation of interferon stimulated mRNAs and are targeted by a dengue virus non-coding RNA.
G3BP1	10146	26350772	DENV2	A549	siRNA, Western blot, Indirect immunofluorescence microscopy	Dengue virus infection induces formation of G3BP1 granules in human lung epithelial cells.
G3BP2	9908	24992036	DENV2	HuH-7	siRNA, Western blotting,	G3BP1, G3BP2 and CAPRIN1 are required for translation of interferon stimulated mRNAs and are targeted by a dengue virus non-coding RNA.
G6PD	2539	24625456	DENV2	Primary human monocytes	FACS, Plague assay, Detection of nitric oxide, superoxide and oxidative stress	Dengue virus type 2 (DENV2)-induced oxidative responses in monocytes from glucose-6-phosphate dehydrogenase (G6PD)-deficient and G6PD normal subjects.
GALNT10	55568	19396146	DENV2	Huh7	siRNA	Discovery of insect and human dengue virus host factors.
GANAB	23193	19396146	DENV2	Huh7	siRNA	Discovery of insect and human dengue virus host factors.
GBP1	2633	23186538	DENV2	RAW264.7	qRT-PCR, Western blot, siRNA	Guanylate-binding protein 1 participates in cellular antiviral response to dengue virus.
GCH1	2643	19396146	DENV2	Huh7	siRNA	Discovery of insect and human dengue virus host factors.
GCLC	2729	25521078	DENV2	Human Monocyte derived Dendritic cells	Quantitative real-time PCR	Cellular Oxidative Stress Response Controls the Antiviral and Apoptotic Programs in Dengue Virus-Infected Dendritic Cells
GCLM	2730	25521078	DENV2	Human Monocyte derived Dendritic cells	Quantitative real-time PCR	Cellular Oxidative Stress Response Controls the Antiviral and Apoptotic Programs in Dengue Virus-Infected Dendritic Cells
GNB2L1	10399	20855599	DENV2	Huh-7.5, 293T	siRNA	Dengue virus nonstructural protein 3 redistributes fatty acid synthase to sites of viral replication and increases cellular fatty acid synthesis.
GORASP1	64689	20122152	DENV1, DENV2, DENV3, DENV4	Huh7, HepG2	siRNA	Small interference RNA profiling reveals the essential role of human membrane trafficking genes in mediating the infectious entry of dengue virus.
GSX1	219409	19396146	DENV2	Huh7	siRNA	Discovery of insect and human dengue virus host factors.
HAVCR1	26762	23084921	DENV1, DENV2, DENV3, DENV4	293T, CHO745, Cos-7, A549, Vero, Huh7 5.1	Cell-Binding Assay, siRNA, Immunofluroscence assay	The TIM and TAM families of phosphatidylserine receptors mediate dengue virus entry.
HIF1A	3091	25521078	DENV2	Human Monocyte derived Dendritic cells	Enrichment analysis of transcription factors activating the DEGs	Cellular Oxidative Stress Response Controls the Antiviral and Apoptotic Programs in Dengue Virus-Infected Dendritic Cells
HIP1	3092	20122152	DENV1, DENV2, DENV3, DENV4	Huh7, HepG2	siRNA	Small interference RNA profiling reveals the essential role of human membrane trafficking genes in mediating the infectious entry of dengue virus.
HIP1R	9026	20122152	DENV1, DENV2, DENV3, DENV4	Huh7, HepG2	siRNA	Small interference RNA profiling reveals the essential role of human membrane trafficking genes in mediating the infectious entry of dengue virus.
HK2	3099	25505078	DENV2	Primary human foreskin fibroblasts (HFFs)	Western blotting, qRT-PCR	Dengue virus induces and requires glycolysis for optimal replication.
HLA-A	3105	25981524	DENV1, DENV2, DENV3, DENV4	HepG2	RT-PCR, Western blotting	Different serotypes of dengue viruses differently regulate the expression of the host cell antigen processing machinery
HLA-B	3106	25981524	DENV1, DENV2, DENV3, DENV4	HepG2	RT-PCR, Western blotting	Different serotypes of dengue viruses differently regulate the expression of the host cell antigen processing machinery
HLA-DRB1	3123	20113369	DENV2	Patient blood samples, PBMCs	FACS	Differential regulation of toll-like receptor-2, toll-like receptor-4, CD16 and human leucocyte antigen-DR on peripheral blood monocytes during mild and severe dengue fever.
HMGB1	3146	18076993	DENV2	A549	Western blotting	Dengue virus infection induces passive release of high mobility group box 1 protein by epithelial cells
HMGB1	3146	19369409	DENV2	Primary human dendritic cells, CD3+ T cells	Immunofluorescence staining, ELISA	Dengue virus infection promotes translocation of high mobility group box 1 protein from the nucleus to the cytosol in dendritic cells, upregulates cytokine production and modulates virus replication.
HMGB1	3146	23269659		Patients sera	ELISA	High mobility group box 1 protein as an auxiliary biomarker for dengue diagnosis.
HMGCR	3156	23642566	DENV2, DENV3	Huh7	Western blotting, Immunofluorescence microscopy	The increase in cholesterol levels at early stages after dengue virus infection correlates with an augment in LDL particle uptake and HMG-CoA reductase activity.
HMGCS1	3157	19419745	DENV2	A549, K562	siRNA, Inhibition studies	Cholesterol biosynthesis modulation regulates dengue viral replication.
HMOX1	3162	25521078	DENV2	Human Monocyte derived Dendritic cells	Quantitative real-time PCR	Cellular Oxidative Stress Response Controls the Antiviral and Apoptotic Programs in Dengue Virus-Infected Dendritic Cells
HNRNPH1	3187	22207023	DENV2	THP-1	Proteomic analysis, siRNA, FACs,	Dengue virus infection induces upregulation of hn RNP-H and PDIA3 for its multiplication in the host cell.
HPSE	10855	22908290	DENV2	Huh7, AG129	ISG inhibition assays	Dengue reporter viruses reveal viral dynamics in interferon receptor-deficient mice and sensitivity to interferon effectors in vitro.
HPX	3263	25349378		Patients sera	Surface-enhanced laser desorption/ionization time-of-flight mass spectrometry, ELISA, Western blotting	Discovery and characterization of potential prognostic biomarkers for dengue hemorrhagic fever.
HRNR	388697	19396146	DENV2	Huh7	siRNA	Discovery of insect and human dengue virus host factors.
HSP90AA1	3320	15795242	DENV2	U937, Monocyte derived macrophages (MDMs)	Virus overlay protein binding assay, Affinity chromatography followed by MALDI, His tag pull down assay	Heat shock protein 90 and heat shock protein 70 are components of dengue virus receptor complex in human cells.
HSPA4	3308	21142441	DENV2	THP-1	siRNA, Real time RT-PCR	Dengue virus infection activates cellular chaperone Hsp70 in THP-1 cells: downregulation of Hsp70 by siRNA revealed decreased viral replication.
HSPA5	3309	15098107	DENV2	HepG2	Viral overlay protein binding assay, Mass Spectrometry fingerprinting	Identification of GRP 78 (BiP) as a liver cell expressed receptor element for dengue virus serotype 2.
HSPA5	3309	19793816	DENV2	K562, 293	2DE-PAGE followed by Mass spectrometry	Dengue virus infection induces upregulation of GRP78, which acts to chaperone viral antigen production.
HSPA5	3309	21385877	DENV2	Human fibrosarcoma 2fTGH cells, MEF	Western blottting	Dengue virus modulates the unfolded protein response in a time-dependent manner.
HSPA5	3309	22457813	DENV2	HepG2	siRNA	RNA interference mediated inhibition of dengue virus multiplication and entry in HepG2 cells.
HSPA5	3309	24034452	DENV2	HepG2	Real time PCR	Dengue 2 infection of HepG2 liver cells results in endoplasmic reticulum stress and induction of multiple pathways of cell death.
HSPD1	3329	19261350	DENV2	U937	siRNA	RNA interference mediated silencing of Hsp60 gene in human monocytic myeloma cell line U937 revealed decreased dengue virus multiplication.
HTR2A	3356	24599995	DENV1, DENV2, DENV3, DENV4	293, HeLa	Inhibition assay, siRNA	Inhibition of dengue virus replication by a class of small-molecule compounds that antagonize dopamine receptor d4 and downstream mitogen-activated protein kinase signaling.
ICAM1	3383	15611263	DENV2	Human microvascular endothelial cell line-1 HMEC-1,	Western blot, FACs, ELISA, RT-PCR, Adhesion assay	Expression of Cytokine, Chemokine, and Adhesion Molecules during Endothelial Cell Activation Induced by Antibodies against Dengue Virus Nonstructural Protein 1
ICAM1	3383	22129847	DENV2	Human microvascular endothelial cells (HMVEC)	qRT-PCR, Western blot	Dengue hemorrhagic fever-associated immunomediators induced via maturation of dengue virus nonstructural 4B protein in monocytes modulate endothelial cell adhesion molecules and human microvascular endothelial cells permeability.
ICAM1	3383	23383040	DHF, DENV2	THP-1, HUVEC, DHF Patient sera	RT-PCR, ELISA, FACS	Dengue virus enhances thrombomodulin and ICAM-1 expression through the macrophage migration inhibitory factor induction of the MAPK and PI3K signaling pathways.
ICAM1	3383	26130295	DENV2, DENV4	Human dermal fibroblasts (HDFs), Human dermal microvascular endothelial cells (HDMECs)	Leukocyte transendothelial migration assay, FACS,	Soluble mediators produced by the crosstalk between microvascular endothelial cells and dengue-infected primary dermal fibroblasts inhibit dengue virus replication and increase leukocyte transmigration
ICAM1	3383	26255888	DF, DHF and DSS	Patients sera	ELISA	Host biomarkers are associated with progression to dengue haemorrhagic fever: a nested case-control study
ICAM1	3383	21068256		Cord blood-derived mast cells (CBMCs), human mast cell-like line (HMC-1 ), HUVEC	ELISA	Dengue virus infection of mast cells triggers endothelial cell activation.
IDO1	3620	25521078	DENV2	Human Monocyte derived Dendritic cells	Inhibition followed by Fluidigm BioMark high throughput qPCR assay	Cellular Oxidative Stress Response Controls the Antiviral and Apoptotic Programs in Dengue Virus-Infected Dendritic Cells
IFI6	2537	22908290	DENV2	Huh7, AG129	ISG inhibition assays	Dengue reporter viruses reveal viral dynamics in interferon receptor-deficient mice and sensitivity to interferon effectors in vitro.
IFI6	2537	25138703	DENV2	HUVEC, EA.hy926	Knockdown analysis, expression analysis	Coordinated regulation of autophagy and apoptosis determines endothelial cell fate during Dengue virus type 2 infection.
IFI6	2537	26244642	DENV2	HUVEC, EA.hy926	siRNA, Overexpression studies, Immunofluorescence microscopy, Western blot	IFI6 Inhibits Apoptosis via Mitochondrial-Dependent Pathway in Dengue Virus 2 Infected Vascular Endothelial Cells.
IFIH1	64135	20158392	ADE DENV2	THP-1	Western blotting	Mechanisms of immune evasion induced by a complex of dengue virus and preexisting enhancing antibodies.
IFIH1	64135	21113677	DENV2, DENV4	A549, BHK-21	siRNA, RT-PCR, Western blot	Retinoic acid inducible gene-I and melanoma differentiation-associated gene 5 are induced but not essential for dengue virus induced type I interferon response.
IFIH1	64135	21245912	DENV1	Macrophages, Huh-7 and shRIG-I cells	RT-PCR, siRNA, Western blot, ELISA, Immunofluorescence microscopy	RIG-I, MDA5 and TLR3 synergistically play an important role in restriction of dengue virus infection.
IFIT1	3434	24223959	DENV2	A549	qRT-PCR, siRNA	Protective roles of interferon-induced protein with tetratricopeptide repeats 3 (IFIT3) in dengue virus infection of human lung epithelial cells.
IFIT1	3434	25521078	DENV2	Human Monocyte derived Dendritic cells	Quantitative real-time PCR	Cellular Oxidative Stress Response Controls the Antiviral and Apoptotic Programs in Dengue Virus-Infected Dendritic Cells
IFIT1	3434	25902155	DENV2	HUVEC	RT-PCR	Dengue Virus Infection of Primary Endothelial Cells Induces Innate Immune Responses, Changes in Endothelial Cells Function and Is Restricted by Interferon-Stimulated Responses
IFIT2	3433	24223959	DENV2	A549	qRT-PCR, siRNA	Protective roles of interferon-induced protein with tetratricopeptide repeats 3 (IFIT3) in dengue virus infection of human lung epithelial cells.
IFIT3	3437	24223959	DENV2	A549	qRT-PCR, siRNA	Protective roles of interferon-induced protein with tetratricopeptide repeats 3 (IFIT3) in dengue virus infection of human lung epithelial cells.
IFIT5	24138	24223959	DENV2	A549	qRT-PCR, siRNA	Protective roles of interferon-induced protein with tetratricopeptide repeats 3 (IFIT3) in dengue virus infection of human lung epithelial cells.
IFITM1	8519	25521078	DENV2	Human Monocyte derived Dendritic cells	Inhibition followed by Fluidigm BioMark high throughput qPCR assay	Cellular Oxidative Stress Response Controls the Antiviral and Apoptotic Programs in Dengue Virus-Infected Dendritic Cells
IFITM2	10581	20534863	DENV1	HEK293-derived cell line FLP-IN T Rex (Invitrogen)	Overexpression studies, siRNA studies	Identification of five interferon-induced cellular proteins that inhibit west nile virus and dengue virus infections.
IFITM2	10581	22908290	DENV2	Huh7, AG129	ISG inhibition assays	Dengue reporter viruses reveal viral dynamics in interferon receptor-deficient mice and sensitivity to interferon effectors in vitro.
IFITM2	10581	24992036	DENV2	HuH-7	Real-time RT-PCR, Western blotting, ISRE-luciferase reporter assay	G3BP1, G3BP2 and CAPRIN1 are required for translation of interferon stimulated mRNAs and are targeted by a dengue virus non-coding RNA.
IFITM2	10581	25521078	DENV2	Human Monocyte derived Dendritic cells	Inhibition followed by Fluidigm BioMark high throughput qPCR assay	Cellular Oxidative Stress Response Controls the Antiviral and Apoptotic Programs in Dengue Virus-Infected Dendritic Cells
IFITM3	10410	20534863	DENV1	HEK293-derived cell line FLP-IN T Rex (Invitrogen)	Overexpression studies, siRNA studies	Identification of five interferon-induced cellular proteins that inhibit west nile virus and dengue virus infections.
IFITM3	10410	22908290	DENV2	Huh7, AG129	ISG inhibition assays	Dengue reporter viruses reveal viral dynamics in interferon receptor-deficient mice and sensitivity to interferon effectors in vitro.
IFITM3	10410	23658454	DENV2	A549, HeLa, MDCK, 293T	Immunoprecipitation, Affinity purification coupled to mass spectroscopy, Mutation analysis	The CD225 domain of IFITM3 is required for both IFITM protein association and inhibition of influenza A virus and dengue virus replication.
IFITM3	10410	25131332	DENV2	THP-1, A549, Huh7, 293T, U937, HepG2, HeLa, BHK-21	Knockdown analysis, expression analysis	IFITM3-containing exosome as a novel mediator for anti-viral response in dengue virus infection.
IFITM3	10410	25521078	DENV2	Human Monocyte derived Dendritic cells	Inhibition followed by Fluidigm BioMark high throughput qPCR assay	Cellular Oxidative Stress Response Controls the Antiviral and Apoptotic Programs in Dengue Virus-Infected Dendritic Cells
IFNA1	3439	11264339	DENV2	Human Myeloid Dendritic Cells	ELISA	Human Dendritic Cells Are Activated by Dengue Virus Infection: Enhancement by Gamma Interferon and Implications for Disease Pathogenesis
IFNA1	3439	15944325	DENV2	Human Monocyte-derived dendritic cells	FACs	Dengue Virus Type 2 Antagonizes IFN-α but Not IFN-γ Antiviral Effect via Down-Regulating Tyk2-STAT Signaling in the Human Dendritic Cell
IFNA1	3439	25521078	DENV2	Human Monocyte derived Dendritic cells	Inhibition followed by Fluidigm BioMark high throughput qPCR assay	Cellular Oxidative Stress Response Controls the Antiviral and Apoptotic Programs in Dengue Virus-Infected Dendritic Cells
IFNA2	3440	10799569	DENV2	Human foreskin fibroblasts HFF, HepG2, K562, THP-1	Competitive asymmetric reverse transcriptase-mediated PCR (RT-PCR), FACs, Plaque assay	Modulation of Dengue virus infection in human cells by alpha, beta, and gamma interferons.
IFNA2	3440	11264339	DENV2	Human Myeloid Dendritic Cells	ELISA	Human Dendritic Cells Are Activated by Dengue Virus Infection: Enhancement by Gamma Interferon and Implications for Disease Pathogenesis
IFNA2	3440	15944325	DENV2	Human Monocyte-derived dendritic cells	FACs	Dengue Virus Type 2 Antagonizes IFN-α but Not IFN-γ Antiviral Effect via Down-Regulating Tyk2-STAT Signaling in the Human Dendritic Cell
IFNA2	3440	25521078	DENV2	Human Monocyte derived Dendritic cells	Inhibition followed by Fluidigm BioMark high throughput qPCR assay	Cellular Oxidative Stress Response Controls the Antiviral and Apoptotic Programs in Dengue Virus-Infected Dendritic Cells
IFNB1	3456	10799569	DENV2	Human foreskin fibroblasts HFF, HepG2, K562, THP-1	Competitive asymmetric reverse transcriptase-mediated PCR (RT-PCR), FACs, Plaque assay	Modulation of Dengue virus infection in human cells by alpha, beta, and gamma interferons.
IFNB1	3456	11689052	DENV2, DENV3	HepG2, K562	viral RNA quantification by RT-PCR, viral plaque assays, Biosynthetic labeling and immunoprecipitation	Interferon inhibits dengue virus infection by preventing translation of viral RNA through a PKR-independent mechanism.
IFNB1	3456	20158392	ADE DENV2	THP-1	ELISA	Mechanisms of immune evasion induced by a complex of dengue virus and preexisting enhancing antibodies.
IFNB1	3456	21829730	DENV2	HepG2	RT-PCR, Immunofluorescence microscopy	Activation of Toll-like receptor 3 impairs the dengue virus serotype 2 replication through induction of IFN-β in cultured hepatoma cells.
IFNB1	3456	22927911	DENV2	Human bone-marrow–derived dendritic cells	qPCR	Dengue virus serotype 2 blocks extracellular signal-regulated kinase and nuclear factor-κB activation to downregulate cytokine production.
IFNB1	3456	25122182	DENV1, DENV2, DENV3	U937	qRT-PCR, ELISA	MicroRNA-30e* suppresses dengue virus replication by promoting NF-κB-dependent IFN production.
IFNB1	3456	25521078	DENV2	Human Monocyte derived Dendritic cells	Inhibition followed by Fluidigm BioMark high throughput qPCR assay	Cellular Oxidative Stress Response Controls the Antiviral and Apoptotic Programs in Dengue Virus-Infected Dendritic Cells
IFNB1	3456	25902155	DENV2	HUVEC	IFN-b blocking studies	Dengue Virus Infection of Primary Endothelial Cells Induces Innate Immune Responses, Changes in Endothelial Cells Function and Is Restricted by Interferon-Stimulated Responses
IFNG	3458	1939640	DF, DHF	Patients sera	RIA	Activation of T lymphocytes in dengue virus infections. High levels of soluble interleukin 2 receptor, soluble CD4, soluble CD8, interleukin 2, and interferon-gamma in sera of children with dengue.
IFNG	3458	11264339	DENV2	Human Myeloid Dendritic Cells	ELISA	Human Dendritic Cells Are Activated by Dengue Virus Infection: Enhancement by Gamma Interferon and Implications for Disease Pathogenesis
IFNG	3458	11689052	DENV2, DENV3	HepG2, K562	viral RNA quantification by RT-PCR, viral plaque assays, Biosynthetic labeling and immunoprecipitation	Interferon inhibits dengue virus infection by preventing translation of viral RNA through a PKR-independent mechanism.
IFNG	3458	15624700	DENV2	Human Monocyte-derived dendritic cells, Human Peripheral blood T cells	FACs, ELISA, T cell proliferation assay	Infection of human dendritic cells by dengue virus activates and primes T cells towards Th0-like phenotype producing both Th1 and Th2 cytokines
IFNG	3458	17251552	DENV2	THP-1	Antibody-dependent enhancement (ADE) infection assay, ELISA	Dengue virus (DENV) antibody-dependent enhancement of infection upregulates the production of anti-inflammatory cytokines, but suppresses anti-DENV free radical and pro-inflammatory cytokine production, in THP-1 cells
IFNLR1	163702	22908290	DENV2	Huh7, AG129	ISG inhibition assays	Dengue reporter viruses reveal viral dynamics in interferon receptor-deficient mice and sensitivity to interferon effectors in vitro.
IFN-β	3456	22927911	DENV2	Human bone-marrow–derived dendritic cells	qPCR	Dengue virus serotype 2 blocks extracellular signal-regulated kinase and nuclear factor-κB activation to downregulate cytokine production.
IL10	3586	15624700	DENV2	Human Monocyte-derived dendritic cells, Human Peripheral blood T cells	FACs, ELISA, T cell proliferation assay	Infection of human dendritic cells by dengue virus activates and primes T cells towards Th0-like phenotype producing both Th1 and Th2 cytokines
IL10	3586	17251552	DENV2	THP-1	Antibody-dependent enhancement (ADE) infection assay, ELISA	Dengue virus (DENV) antibody-dependent enhancement of infection upregulates the production of anti-inflammatory cytokines, but suppresses anti-DENV free radical and pro-inflammatory cytokine production, in THP-1 cells
IL10	3586	20158392	ADE DENV2	THP-1	ELISA	Mechanisms of immune evasion induced by a complex of dengue virus and preexisting enhancing antibodies.
IL10	3586	22927911	DENV3	Human bone-marrow–derived dendritic cells	qPCR	Dengue virus serotype 2 blocks extracellular signal-regulated kinase and nuclear factor-κB activation to downregulate cytokine production.
IL10RA	3587	20158392	ADE DENV2	THP-1	cDNA array	Mechanisms of immune evasion induced by a complex of dengue virus and preexisting enhancing antibodies.
IL12A	3592	17251552	DENV2	THP-1	Antibody-dependent enhancement (ADE) infection assay, ELISA	Dengue virus (DENV) antibody-dependent enhancement of infection upregulates the production of anti-inflammatory cytokines, but suppresses anti-DENV free radical and pro-inflammatory cytokine production, in THP-1 cells
IL12A	3592	22927911	DENV2	Human bone-marrow–derived dendritic cells	qPCR	Dengue virus serotype 2 blocks extracellular signal-regulated kinase and nuclear factor-κB activation to downregulate cytokine production.
IL12A	3592	23616663	DENV4	U937, MDCK	BD cytometric bead array	The cytokine response of U937-derived macrophages infected through antibody-dependent enhancement of dengue virus disrupts cell apical-junction complexes and increases vascular permeability.
IL12B	3593	17251552	DENV2	THP-1	Antibody-dependent enhancement (ADE) infection assay, ELISA	Dengue virus (DENV) antibody-dependent enhancement of infection upregulates the production of anti-inflammatory cytokines, but suppresses anti-DENV free radical and pro-inflammatory cytokine production, in THP-1 cells
IL12B	3593	22927911	DENV2	Human bone-marrow–derived dendritic cells	qPCR	Dengue virus serotype 2 blocks extracellular signal-regulated kinase and nuclear factor-κB activation to downregulate cytokine production.
IL12B	3593	23616663	DENV4	U937, MDCK	BD cytometric bead array	The cytokine response of U937-derived macrophages infected through antibody-dependent enhancement of dengue virus disrupts cell apical-junction complexes and increases vascular permeability.
IL18	3606	23152543	DENV2	Human Monocyte derived macrophages (MDMs)	ELISA, Western blotting	CLEC5A is critical for dengue virus-induced inflammasome activation in human macrophages.
IL18	3606	25732728	DENV1	Human blood derived Dendritic cells, gamma-delta T cells	ELISA	Type I IFNs and IL-18 regulate the antiviral response of primary human γδ T cells against dendritic cells infected with Dengue virus.
IL18RAP	8807	26255888	DF, DHF and DSS	Patients sera	ELISA	Host biomarkers are associated with progression to dengue haemorrhagic fever: a nested case-control study
IL1B	3553	23152543	DENV2	Human Monocyte derived macrophages (MDMs)	ELISA, Western blotting	CLEC5A is critical for dengue virus-induced inflammasome activation in human macrophages.
IL1B	3553	23884363	DENV2	Primary human monocytes	ELISA	Dengue virus-infected human monocytes trigger late activation of caspase-1, which mediates pro-inflammatory IL-1β secretion and pyroptosis.
IL1B	3553	25521078	DENV2	Human Monocyte derived Dendritic cells	Inhibition followed by Fluidigm BioMark high throughput qPCR assay	Cellular Oxidative Stress Response Controls the Antiviral and Apoptotic Programs in Dengue Virus-Infected Dendritic Cells
IL1B	3553	26032420	DENV2	Human primary monocytes	Real-time PCR, Western blot	Spleen Tyrosine Kinase (Syk) Mediates IL-1β Induction by Primary Human Monocytes during Antibody-enhanced Dengue Virus Infection.
IL2	3558	1939640	DF, DHF	Patients sera	ELISA	Activation of T lymphocytes in dengue virus infections. High levels of soluble interleukin 2 receptor, soluble CD4, soluble CD8, interleukin 2, and interferon-gamma in sera of children with dengue.
IL2	3558	15624700	DENV2	Human Monocyte-derived dendritic cells, Human Peripheral blood T cells	FACs, ELISA, T cell proliferation assay	Infection of human dendritic cells by dengue virus activates and primes T cells towards Th0-like phenotype producing both Th1 and Th2 cytokines
IL2RA	3559	1939640	DF, DHF	Patients sera	ELISA	Activation of T lymphocytes in dengue virus infections. High levels of soluble interleukin 2 receptor, soluble CD4, soluble CD8, interleukin 2, and interferon-gamma in sera of children with dengue.
IL4	3565	15624700	DENV2	Human Monocyte-derived dendritic cells, Human Peripheral blood T cells	FACs, ELISA, T cell proliferation assay	Infection of human dendritic cells by dengue virus activates and primes T cells towards Th0-like phenotype producing both Th1 and Th2 cytokines
IL6	3569	15304247	DF Grade I, DF Grade II	Serial blood samples	ELISA	Systemic host inflammatory and coagulation response in the Dengue virus primo-infection
IL6	3569	15611263	DENV2	Human microvascular endothelial cell line-1 HMEC-1,	Western blot, FACs, ELISA, RT-PCR	Expression of Cytokine, Chemokine, and Adhesion Molecules during Endothelial Cell Activation Induced by Antibodies against Dengue Virus Nonstructural Protein 1
IL6	3569	17251552	DENV2	THP-1	Antibody-dependent enhancement (ADE) infection assay, ELISA	Dengue virus (DENV) antibody-dependent enhancement of infection upregulates the production of anti-inflammatory cytokines, but suppresses anti-DENV free radical and pro-inflammatory cytokine production, in THP-1 cells
IL6	3569	19733377	DENV2, DENV3, DENV4	Serum of DF and DHF patient	ELISA	Increment of interleukin 6, tumour necrosis factor alpha, nitric oxide, C-reactive protein and apoptosis in dengue.
IL6	3569	22496214	DENV4	HUVEC	ELISA	Endothelial cells elicit immune-enhancing responses to dengue virus infection.
IL6	3569	23616663	DENV4	U937, MDCK	BD cytometric bead array	The cytokine response of U937-derived macrophages infected through antibody-dependent enhancement of dengue virus disrupts cell apical-junction complexes and increases vascular permeability.
IL6	3569	25521078	DENV2	Human Monocyte derived Dendritic cells	Inhibition followed by Fluidigm BioMark high throughput qPCR assay	Cellular Oxidative Stress Response Controls the Antiviral and Apoptotic Programs in Dengue Virus-Infected Dendritic Cells
IL7	3574	22496214	DENV4	HUVEC	ELISA	Endothelial cells elicit immune-enhancing responses to dengue virus infection.
IRF1	3659	16182584	DENV2	A549	Western blotting	Flavivirus induces interferon-beta gene expression through a pathway involving RIG-I-dependent IRF-3 and PI3K-dependent NF-kappaB activation.
IRF1	3659	17251552	DENV2	THP-1	Antibody-dependent enhancement (ADE) infection assay, ELISA	Dengue virus (DENV) antibody-dependent enhancement of infection upregulates the production of anti-inflammatory cytokines, but suppresses anti-DENV free radical and pro-inflammatory cytokine production, in THP-1 cells
IRF1	3659	20158392	ADE DENV2	THP-1	cDNA array	Mechanisms of immune evasion induced by a complex of dengue virus and preexisting enhancing antibodies.
IRF1	3659	22908290	DENV2	Huh7, AG129	ISG inhibition assays	Dengue reporter viruses reveal viral dynamics in interferon receptor-deficient mice and sensitivity to interferon effectors in vitro.
IRF1	3659	25521078	DENV2	Human Monocyte derived Dendritic cells	Enrichment analysis of transcription factors activating the DEGs	Cellular Oxidative Stress Response Controls the Antiviral and Apoptotic Programs in Dengue Virus-Infected Dendritic Cells
IRF3	3661	16182584	DENV2	A549	Western blotting	Flavivirus induces interferon-beta gene expression through a pathway involving RIG-I-dependent IRF-3 and PI3K-dependent NF-kappaB activation.
IRF3	3661	25521078	DENV2	Human Monocyte derived Dendritic cells	Enrichment analysis of transcription factors activating the DEGs	Cellular Oxidative Stress Response Controls the Antiviral and Apoptotic Programs in Dengue Virus-Infected Dendritic Cells
IRF7	3665	16182584	DENV2	A549	Western blotting	Flavivirus induces interferon-beta gene expression through a pathway involving RIG-I-dependent IRF-3 and PI3K-dependent NF-kappaB activation.
IRF7	3665	22908290	DENV2	Huh7, AG129	ISG inhibition assays	Dengue reporter viruses reveal viral dynamics in interferon receptor-deficient mice and sensitivity to interferon effectors in vitro.
IRF7	3665	25521078	DENV2	Human Monocyte derived Dendritic cells	Enrichment analysis of transcription factors activating the DEGs	Cellular Oxidative Stress Response Controls the Antiviral and Apoptotic Programs in Dengue Virus-Infected Dendritic Cells
IRF9	10379	25521078	DENV2	Human Monocyte derived Dendritic cells	Enrichment analysis of transcription factors activating the DEGs	Cellular Oxidative Stress Response Controls the Antiviral and Apoptotic Programs in Dengue Virus-Infected Dendritic Cells
ISG15	9636	24769207	DENV2	HeLa, 293T	Overexpression studies, siRNA studies	Interferon-mediated ISG15 conjugation restricts dengue virus 2 replication.
ISG15	9636	24992036	DENV2	HuH-7	Real-time RT-PCR, Western blotting, ISRE-luciferase reporter assay	G3BP1, G3BP2 and CAPRIN1 are required for translation of interferon stimulated mRNAs and are targeted by a dengue virus non-coding RNA.
ITGB3	3690	17382900	DENV2	HMEC-1	FACS, Real time RT-PCR	Up-regulated expression of beta3 integrin induced by dengue virus serotype 2 infection associated with virus entry into human dermal microvascular endothelial cells.
ITSN2	50618	20122152	DENV1, DENV2, DENV3, DENV4	Huh7, HepG2	siRNA	Small interference RNA profiling reveals the essential role of human membrane trafficking genes in mediating the infectious entry of dengue virus.
JAK2	3717	21893572	DENV2	HepG2	EMSA, Western blotting	Janus kinase/signal transducer and activator of transcription 3 signaling pathway is crucial in chemokine production from hepatocytes infected by dengue virus.
JAK3	3718	21893572	DENV2	HepG2	EMSA, Western blotting	Janus kinase/signal transducer and activator of transcription 3 signaling pathway is crucial in chemokine production from hepatocytes infected by dengue virus.
JNK	5599	19897220	DENV2	Human Monocyte-derived macrophages	Indirect immunofluorescence microscopy, Western blot, Inhibition assay	JNK phosphorylation, induced during dengue virus infection, is important for viral infection and requires the presence of cholesterol.
JUN	3725	16544247	DENV2	293A, HepG2	Inhibition assay, Luciferase reporter gene assay	Cell Type–Specific Mechanisms of Interleukin-8 Induction by Dengue Virus and Differential Response to Drug Treatment
JUN	3725	19897220	DENV2	Human Monocyte-derived macrophages	Indirect immunofluorescence microscopy, Western blot, Inhibition assay	JNK phosphorylation, induced during dengue virus infection, is important for viral infection and requires the presence of cholesterol.
KDR	3791	26255888	DF, DHF and DSS	Patients sera	ELISA	Host biomarkers are associated with progression to dengue haemorrhagic fever: a nested case-control study
LCP2	3937	25046486	DENV2	Huh7	siRNA	Kinome siRNA screen identifies novel cell-type specific dengue host target genes.
LDLR	3949	23642566	DENV2, DENV3	Huh7	Western blotting, Immunofluorescence microscopy	The increase in cholesterol levels at early stages after dengue virus infection correlates with an augment in LDL particle uptake and HMG-CoA reductase activity.
LGALS9	3965	25754930	DENV2	Human monocyte derived Dendritic cells, gamma-delta T cells	qRT-PCR, Western blot, FACS, siRNA, Inhibition studies	Up-regulation of galectin-9 induces cell migration in human dendritic cells infected with dengue virus.
LILRB1	10859	24550301	DENV1, DENV2, DENV3, DENV4	THP-1	Competition binding assay, siRNA, Overexpression analysis	Leukocyte immunoglobulin-like receptor B1 is critical for antibody-dependent dengue.
LRIG3	121227	19396146	DENV2	Huh7	siRNA	Discovery of insect and human dengue virus host factors.
MAK	4117	25046486	DENV2	Huh7	siRNA	Kinome siRNA screen identifies novel cell-type specific dengue host target genes.
MAP1LC3A	84557	19141455	DENV2	HepG2	Co-localization studies through Confocal microscopy, Inhibition studies	Co-localization of constituents of the dengue virus translation and replication machinery with amphisomes.
MAP1LC3A	84557	19264601	DENV3	HepG2	Co-localization studies through Confocal microscopy	A role for autophagolysosomes in dengue virus 3 production in HepG2 cells.
MAP4K5	11183	25046486	DENV2	Huh7	siRNA	Kinome siRNA screen identifies novel cell-type specific dengue host target genes.
MAPK1	5594	18449425	DENV2	HUVEC	Western blot, Inhibition studies	Crosstalk between coagulation and inflammation during Dengue virus infection
MAPK11	5600	19897220	DENV2	Human Monocyte-derived macrophages	Indirect immunofluorescence microscopy, Western blot, Inhibition assay	JNK phosphorylation, induced during dengue virus infection, is important for viral infection and requires the presence of cholesterol.
MAPK11	5600	25754930	DENV2	Human monocyte derived Dendritic cells, gamma-delta T cells	Inhibition studies	Up-regulation of galectin-9 induces cell migration in human dendritic cells infected with dengue virus.
MAPK14	1432	18449425	DENV2	HUVEC	Western blot, Inhibition studies	Crosstalk between coagulation and inflammation during Dengue virus infection
MAPK14	1432	19897220	DENV2	Human Monocyte-derived macrophages	Indirect immunofluorescence microscopy, Western blot, Inhibition assay	JNK phosphorylation, induced during dengue virus infection, is important for viral infection and requires the presence of cholesterol.
MAPK14	1432	23557259	DENV2	HepG2	siRNA	Inhibition of p38MAPK and CD137 signaling reduce dengue virus-induced TNF-α secretion and apoptosis.
MAPK14	1432	25131378		Human PBMCs, THP-1, KU812	Inhibition studies	Modulation of inflammation and pathology during dengue virus infection by p38 MAPK inhibitor SB203580.
MAPK14	1432	25754930	DENV2	Human monocyte derived Dendritic cells, gamma-delta T cells	Inhibition studies	Up-regulation of galectin-9 induces cell migration in human dendritic cells infected with dengue virus.
MAPK3	5595	18449425	DENV2	HUVEC	Western blot, Inhibition studies	Crosstalk between coagulation and inflammation during Dengue virus infection
MAPK8IP2	23542	20122152	DENV1, DENV2, DENV3, DENV4	Huh7, HepG2	siRNA	Small interference RNA profiling reveals the essential role of human membrane trafficking genes in mediating the infectious entry of dengue virus.
MIF	4282	21320786	DENV2	HMEC-1	siRNA, ELISA	Macrophage migration inhibitory factor induced by dengue virus infection increases vascular permeability.
MIF	4282	23383040	DHF, DENV2	THP-1, HUVEC, DHF Patient sera	RT-PCR, ELISA, FACS	Dengue virus enhances thrombomodulin and ICAM-1 expression through the macrophage migration inhibitory factor induction of the MAPK and PI3K signaling pathways.
MIR146A	406938	23685241	DENV2	THP-1	Real-time PCR, Northern blotting	miR-146a facilitates replication of dengue virus by dampening interferon induction by targeting TRAF6.
MIR30E	407034	25122182	DENV1, DENV2, DENV3	U937	siRNA, qRT-PCR	MicroRNA-30e* suppresses dengue virus replication by promoting NF-κB-dependent IFN production.
MIRLET7C	406885	25445350	DENV2, DENV4	Huh7	Microarray, Real-time RT-PCR	Let-7c overexpression inhibits dengue virus replication in human hepatoma Huh-7 cells.
MMP2	4313	17028575	DENV2	Human Monocyte-derived immature dendritic cells, HUVEC	Protein array, In vitro permeability assay, In vivo vascular permeability enhancement assay, Immunofluorescence microscopy	Dengue-virus-infected dendritic cells trigger vascular leakage through metalloproteinase overproduction
MMP2	4313	24928471	Patients with and without plasma leakage	Patient blood samples	ELISA	Serum angiopoietin-2 and soluble VEGF receptor 2 are surrogate markers for plasma leakage in patients with acute dengue virus infection.
MMP2	4313	26073730	DENV2	LLC/MK2	RT-PCR, Gelatinolytic activity assay	Relationship between MMP expression and virulence of dengue virus type-2 infected mosquito and mammalian cells
MMP2	4313	25672410	DENV2	HepG2	Western blot, Gelatin zymography, Semi-quantitative RT-PCR	Different Responses in MMP/TIMP Expression of U937 and HepG2 Cells to Dengue Virus Infection.
MMP3	4314	24416274	DENV2	RAW264.7	qRT-PCR, Western Blot, Co-immunoprecipitation	Matrix metalloproteinase 3 promotes cellular anti-dengue virus response via interaction with transcription factor NF?B in cell nucleus.
MMP9	4318	17028575	DENV2	Human Monocyte-derived immature dendritic cells, HUVEC	Protein array, In vitro permeability assay, In vivo vascular permeability enhancement assay, Immunofluorescence microscopy	Dengue-virus-infected dendritic cells trigger vascular leakage through metalloproteinase overproduction
MMP9	4318	25672410	DENV2	U937	Western blot, Gelatin zymography, Semi-quantitative RT-PCR	Different Responses in MMP/TIMP Expression of U937 and HepG2 Cells to Dengue Virus Infection.
MMP9	4318	26073730	DENV2	LLC/MK2	RT-PCR, Gelatinolytic activity assay	Relationship between MMP expression and virulence of dengue virus type-2 infected mosquito and mammalian cells
MUC2	4583	19396146	DENV2	Huh7	siRNA	Discovery of insect and human dengue virus host factors.
MVD	4597	19419745	DENV2	A549, K562	siRNA, Inhibition studies	Cholesterol biosynthesis modulation regulates dengue viral replication.
MX1	4599	24992036	DENV2	HuH-7	Western blotting	G3BP1, G3BP2 and CAPRIN1 are required for translation of interferon stimulated mRNAs and are targeted by a dengue virus non-coding RNA.
MX1	4599	25521078	DENV2	Human Monocyte derived Dendritic cells	Inhibition followed by Fluidigm BioMark high throughput qPCR assay	Cellular Oxidative Stress Response Controls the Antiviral and Apoptotic Programs in Dengue Virus-Infected Dendritic Cells
NAA35	60560	19396146	DENV2	Huh7	siRNA	Discovery of insect and human dengue virus host factors.
NACA	4666	14981762	DENV2	ECV304	DD-RT-PCR, Real time PCR	Differential display RT-PCR analysis of ECV304 endothelial-like cells infected with dengue virus type 2 reveals messenger RNA expression profiles of multiple human genes involved in known and novel roles.
NAPA	8775	22908290	DENV2	Huh7, AG129	ISG inhibition assays	Dengue reporter viruses reveal viral dynamics in interferon receptor-deficient mice and sensitivity to interferon effectors in vitro.
NEK6	10783	25046486	DENV2	Huh7	siRNA	Kinome siRNA screen identifies novel cell-type specific dengue host target genes.
NFE2L2	4780	25521078	DENV2	Human Monocyte derived Dendritic cells	Enrichment analysis of transcription factors activating the DEGs	Cellular Oxidative Stress Response Controls the Antiviral and Apoptotic Programs in Dengue Virus-Infected Dendritic Cells
NFKB1	4790	9060688	DENV1	HepG2	Immunofluorescence microscopy, Western blot, EMSA	Dengue virus replication in human hepatoma cells activates NF-kappaB which in turn induces apoptotic cell death.
NFKB1	4790	10954569	DENV2	Human neuroblastoma cell line SK-N-SH	NF-kB activation assay	Potential dengue virus-triggered apoptotic pathway in human neuroblastoma cells: arachidonic acid, superoxide anion, and NF-kappaB are sequentially involved.
NFKB1	4790	16544247	DENV2	293A	Inhibition assay, Luciferase reporter gene assay	Cell Type–Specific Mechanisms of Interleukin-8 Induction by Dengue Virus and Differential Response to Drug Treatment
NFKB1	4790	18449425	DENV2	HUVEC	Immunofluorscence microscopy	Crosstalk between coagulation and inflammation during Dengue virus infection
NFKB1	4790	19862774	DENV2	Human Monocyte-derived Dendritic cells	EMSA	Triggering of DC migration by dengue virus stimulation of COX-2-dependent signaling cascades in vitro highlights the significance of these cascades beyond inflammation.
NFKB1	4790	22927911	DENV2	Human bone-marrow–derived dendritic cells	Luciferase reporter assay, Immunofluorescence microscopy	Dengue virus serotype 2 blocks extracellular signal-regulated kinase and nuclear factor-κB activation to downregulate cytokine production.
NFKB1	4790	25521078	DENV2	Human Monocyte derived Dendritic cells	Enrichment analysis of transcription factors activating the DEGs	Cellular Oxidative Stress Response Controls the Antiviral and Apoptotic Programs in Dengue Virus-Infected Dendritic Cells
NFKB1	4790	26199460	DENV2	RAW264.7	Western blot, Luciferase reporter assay, Immunofluorescence microscopy, Inhibition studies	Dengue Virus Infection Causes the Activation of Distinct NF-κB Pathways for Inducible Nitric Oxide Synthase and TNF-α Expression in RAW264.7 Cells.
NFKB2	4791	10954569	DENV2	Human neuroblastoma cell line SK-N-SH	NF-kB activation assay	Potential dengue virus-triggered apoptotic pathway in human neuroblastoma cells: arachidonic acid, superoxide anion, and NF-kappaB are sequentially involved.
NFKB2	4791	26199460	DENV2	RAW264.7	Western blot, Luciferase reporter assay, Immunofluorescence microscopy, Inhibition studies	Dengue Virus Infection Causes the Activation of Distinct NF-κB Pathways for Inducible Nitric Oxide Synthase and TNF-α Expression in RAW264.7 Cells.
NFKBIA	4792	25122182	DENV1, DENV2, DENV3	U937	Western blot, Luciferase assay	MicroRNA-30e* suppresses dengue virus replication by promoting NF-κB-dependent IFN production.
NLRP3	114548	23152543	DENV2	Human Monocyte derived macrophages (MDMs)	Western blot, Co-immunoprecipitation, siRNA	CLEC5A is critical for dengue virus-induced inflammasome activation in human macrophages.
NOS2	4843	16109165	DENV1	Primary monocytes	Immuno-labelling followed by FACS analysis	Inducible nitric oxide synthase (iNOS) expression in monocytes during acute Dengue Fever in patients and during in vitro infection.
NOS2	4843	26199460	DENV2	RAW264.7	Western blotting	Dengue Virus Infection Causes the Activation of Distinct NF-κB Pathways for Inducible Nitric Oxide Synthase and TNF-α Expression in RAW264.7 Cells.
NOTCH4	4855	25041739	DENV1, DENV2, DENV3	Macrophages and Dendritic cells from differentiating Human PBMCs and CD4+ T cells	Real time RT-PCR	Dengue virus up-regulates expression of notch ligands Dll1 and Dll4 through interferon-β signalling pathway.
NPR2	4882	19396146	DENV2	Huh7	siRNA	Discovery of insect and human dengue virus host factors.
NQO1	1728	25521078	DENV2	Human Monocyte derived Dendritic cells	Quantitative real-time PCR	Cellular Oxidative Stress Response Controls the Antiviral and Apoptotic Programs in Dengue Virus-Infected Dendritic Cells
NRG1	3084	19396146	DENV2	Huh7	siRNA	Discovery of insect and human dengue virus host factors.
OAS1	4938	19923450	DENV2	A549	Over expression studies, Mutational studies	Distinct antiviral roles for human 2',5'-oligoadenylate synthetase family members against dengue virus infection.
OAS1	4938	25902155	DENV2	HUVEC	RT-PCR	Dengue Virus Infection of Primary Endothelial Cells Induces Innate Immune Responses, Changes in Endothelial Cells Function and Is Restricted by Interferon-Stimulated Responses
OAS3	4940	19923450	DENV2	A549	Over expression studies, Mutational studies	Distinct antiviral roles for human 2',5'-oligoadenylate synthetase family members against dengue virus infection.
OAS3	4940	25521078	DENV2	Human Monocyte derived Dendritic cells	Inhibition followed by Fluidigm BioMark high throughput qPCR assay	Cellular Oxidative Stress Response Controls the Antiviral and Apoptotic Programs in Dengue Virus-Infected Dendritic Cells
OASL	8638	25521078	DENV2	Human Monocyte derived Dendritic cells	Inhibition followed by Fluidigm BioMark high throughput qPCR assay	Cellular Oxidative Stress Response Controls the Antiviral and Apoptotic Programs in Dengue Virus-Infected Dendritic Cells
OCLN	100506658	23616663	DENV4	U937, MDCK	Immunofluorescence microscopy, Western blot, Transepithelial electrical resistance assay, Transmission electron microscopy, Vascular permeability assay	The cytokine response of U937-derived macrophages infected through antibody-dependent enhancement of dengue virus disrupts cell apical-junction complexes and increases vascular permeability.
OPHN1	4983	14981762	DENV2	ECV304	DD-RT-PCR, Real time PCR	Differential display RT-PCR analysis of ECV304 endothelial-like cells infected with dengue virus type 2 reveals messenger RNA expression profiles of multiple human genes involved in known and novel roles.
OSM	5008	20158392	ADE DENV2	THP-1	cDNA array	Mechanisms of immune evasion induced by a complex of dengue virus and preexisting enhancing antibodies.
PACSIN3	29763	20122152	DENV1, DENV2, DENV3, DENV4	Huh7, HepG2	siRNA	Small interference RNA profiling reveals the essential role of human membrane trafficking genes in mediating the infectious entry of dengue virus.
PARP1	142	24314632	DENV2	BHK	Western blotting	Dengue virus subgenomic RNA induces apoptosis through the Bcl-2-mediated PI3k/Akt signaling pathway.
PDIA2	64714	22422622	DENV2	HMEC-1	siRNA, Inhibition studies, FACs, Confocal Microscopy	Endothelial cell surface expression of protein disulfide isomerase activates ?1 and ?3 integrins and facilitates dengue virus infection.
PDIA3	2923	22207023	DENV2	THP-1	Proteomic analysis, siRNA, FACs,	Dengue virus infection induces upregulation of hn RNP-H and PDIA3 for its multiplication in the host cell.
PECAM1	5175	17028575	DENV2	Human Monocyte-derived immature dendritic cells, HUVEC	Protein array, In vitro permeability assay, In vivo vascular permeability enhancement assay, Immunofluorescence microscopy	Dengue-virus-infected dendritic cells trigger vascular leakage through metalloproteinase overproduction
PECAM1	5175	19281230	DENV2	EA.hy926	Western blot, Confocal Laser Scanning Microscopy	Alterations in actin cytoskeletal assembly and junctional protein complexes in human endothelial cells induced by dengue virus infection and mimicry of leukocyte transendothelial migration
PFKFB3	5209	25046486	DENV2	Huh7	siRNA	Kinome siRNA screen identifies novel cell-type specific dengue host target genes.
PHF2	5253	19396146	DENV2	Huh7	siRNA	Discovery of insect and human dengue virus host factors.
PHF20	51230	14981762	DENV2	ECV304	DD-RT-PCR, Real time PCR	Differential display RT-PCR analysis of ECV304 endothelial-like cells infected with dengue virus type 2 reveals messenger RNA expression profiles of multiple human genes involved in known and novel roles.
PHOSPHO2	493911	19396146	DENV2	Huh7	siRNA	Discovery of insect and human dengue virus host factors.
PIAS1	8554	20158392	ADE DENV2	THP-1	cDNA array	Mechanisms of immune evasion induced by a complex of dengue virus and preexisting enhancing antibodies.
PICK1	9463	25046486	DENV2	Huh7	siRNA	Kinome siRNA screen identifies novel cell-type specific dengue host target genes.
PIP4K2B	8396	25046486	DENV2	Huh7	siRNA	Kinome siRNA screen identifies novel cell-type specific dengue host target genes.
PIP5K1A	8394	20122152	DENV1, DENV2, DENV3, DENV4	Huh7, HepG2	siRNA	Small interference RNA profiling reveals the essential role of human membrane trafficking genes in mediating the infectious entry of dengue virus.
PKIB	5570	25046486	DENV2	Huh7	siRNA	Kinome siRNA screen identifies novel cell-type specific dengue host target genes.
PKN3	29941	25046486	DENV2	Huh7	siRNA	Kinome siRNA screen identifies novel cell-type specific dengue host target genes.
PLA2G7	7941	10954569	DENV2	Human neuroblastoma cell line SK-N-SH	PLA2 activity assay, Inhibition studies	Potential dengue virus-triggered apoptotic pathway in human neuroblastoma cells: arachidonic acid, superoxide anion, and NF-kappaB are sequentially involved.
PLAT	5327	17573116	DENV2	HUVEC	RT-PCR	Dengue virus regulates the expression of hemostasis-related molecules in human vein endothelial cells
PLIN3	10226	26161501			Structure and sequence comparison	Understanding Dengue Virus Capsid Protein Interaction with Key Biological Targets.
PLK3	1263	25046486	DENV2	Huh7	siRNA	Kinome siRNA screen identifies novel cell-type specific dengue host target genes.
PMAIP1	5366	24034452	DENV2	HepG2	Real time PCR	Dengue 2 infection of HepG2 liver cells results in endoplasmic reticulum stress and induction of multiple pathways of cell death.
PMAIP1	5366	25521078	DENV2	Human Monocyte derived Dendritic cells	Quantitative real-time PCR	Cellular Oxidative Stress Response Controls the Antiviral and Apoptotic Programs in Dengue Virus-Infected Dendritic Cells
PML	5371	25962098	DENV2	A549	siRNA, Real time RT-PCR	Cellular promyelocytic leukemia protein is an important dengue virus restriction factor.
PNLIPRP1	5407	19396146	DENV2	Huh7	siRNA	Discovery of insect and human dengue virus host factors.
PPP1R15A	23645	21385877	DENV2	Human fibrosarcoma 2fTGH cells, MEF	Western blottting	Dengue virus modulates the unfolded protein response in a time-dependent manner.
PPP2R2A	5520	14981762	DENV2	ECV304	DD-RT-PCR, Real time PCR	Differential display RT-PCR analysis of ECV304 endothelial-like cells infected with dengue virus type 2 reveals messenger RNA expression profiles of multiple human genes involved in known and novel roles.
PRG4	10216	19396146	DENV2	Huh7	siRNA	Discovery of insect and human dengue virus host factors.
PRKCD	5580	25046486	DENV2	Huh7	siRNA	Kinome siRNA screen identifies novel cell-type specific dengue host target genes.
PRKDC	5591	22999307	DENV2	Huh7, 293T	Chemoproteomic profiling, siRNA	Chemoproteomic profiling identifies changes in DNA-PK as markers of early dengue virus infection.
PRKRA	8575	11689052	DENV2, DENV3	HepG2, K562	Knockout studies	Interferon inhibits dengue virus infection by preventing translation of viral RNA through a PKR-independent mechanism.
PRKRA	8575	20534863	DENV1	HEK293-derived cell line FLP-IN T Rex (Invitrogen)	Overexpression studies, siRNA studies	Identification of five interferon-induced cellular proteins that inhibit west nile virus and dengue virus infections.
PRKRA	8575	23372823	DENV1, DENV2, DENV3	A549, HepG2	Western blotting, Immunofluorescence microscopy, siRNA	Protein kinase regulated by dsRNA downregulates the interferon production in dengue virus- and dsRNA-stimulated human lung epithelial cells.
PRKRA	8575	24992036	DENV2	HuH-7	Real-time RT-PCR, Western blotting, ISRE-luciferase reporter assay	G3BP1, G3BP2 and CAPRIN1 are required for translation of interferon stimulated mRNAs and are targeted by a dengue virus non-coding RNA.
PRKRA	8575	26350772	DENV2	A549	Western blot	Dengue virus infection induces formation of G3BP1 granules in human lung epithelial cells.
PROC	5624	19404546	DENV2	HUVEC	Western blot, Confocal microscopy, FACS, ELISA	Modification of the cytoprotective protein C pathway during Dengue virus infection of human endothelial vascular cells
PRR12	57479	19396146	DENV2	Huh7	siRNA	Discovery of insect and human dengue virus host factors.
PSMB9	5698	25981524	DENV2	HepG2	RT-PCR, Western blotting	Different serotypes of dengue viruses differently regulate the expression of the host cell antigen processing machinery
PTGER2	5732	19862774	DENV2	Human Monocyte-derived Dendritic cells	Inhibition studies	Triggering of DC migration by dengue virus stimulation of COX-2-dependent signaling cascades in vitro highlights the significance of these cascades beyond inflammation.
PTGER4	5734	19862774	DENV2	Human Monocyte-derived Dendritic cells	Inhibition studies	Triggering of DC migration by dengue virus stimulation of COX-2-dependent signaling cascades in vitro highlights the significance of these cascades beyond inflammation.
PTGS2	5743	19862774	DENV2	Human Monocyte-derived Dendritic cells	RT-PCR, Western blot	Triggering of DC migration by dengue virus stimulation of COX-2-dependent signaling cascades in vitro highlights the significance of these cascades beyond inflammation.
RAB11B	9230	20122152	DENV1, DENV2, DENV3, DENV4	Huh7, HepG2	siRNA	Small interference RNA profiling reveals the essential role of human membrane trafficking genes in mediating the infectious entry of dengue virus.
RAB29	8934	20122152	DENV1, DENV2, DENV3, DENV4	Huh7, HepG2	siRNA	Small interference RNA profiling reveals the essential role of human membrane trafficking genes in mediating the infectious entry of dengue virus.
RAB29	8934	20855599	DENV2	Huh-7.5, 293T	siRNA	Dengue virus nonstructural protein 3 redistributes fatty acid synthase to sites of viral replication and increases cellular fatty acid synthesis.
RAB3A	5864	20122152	DENV1, DENV2, DENV3, DENV4	Huh7, HepG2	siRNA	Small interference RNA profiling reveals the essential role of human membrane trafficking genes in mediating the infectious entry of dengue virus.
RAB3D	9545	20122152	DENV1, DENV2, DENV3, DENV4	Huh7, HepG2	siRNA	Small interference RNA profiling reveals the essential role of human membrane trafficking genes in mediating the infectious entry of dengue virus.
RAB5A	5868	20122152	DENV1, DENV2, DENV3, DENV4	Huh7, HepG2	siRNA	Small interference RNA profiling reveals the essential role of human membrane trafficking genes in mediating the infectious entry of dengue virus.
RAB8A	4218	18724065	DENV2	HepG2	FACS, Real time RT-PCR, Indirect Immunofluorescence staining	Rab8, a vesicular traffic regulator, is involved in dengue virus infection in HepG2 cells.
RAB8B	51762	20122152	DENV1, DENV2, DENV3, DENV4	Huh7, HepG2	siRNA	Small interference RNA profiling reveals the essential role of human membrane trafficking genes in mediating the infectious entry of dengue virus.
RAC1	5879	19710257	DENV2	HMEC-1	Virus binding assay, FACS, Time-lapse fluorescent microscopy	Cross-talk between Rac1 and Cdc42 GTPases regulates formation of filopodia required for dengue virus type-2 entry into HMEC-1 cells.
REL	5966	26199460	DENV2	RAW264.7	Western blot, Luciferase reporter assay, Immunofluorescence microscopy, Inhibition studies	Dengue Virus Infection Causes the Activation of Distinct NF-κB Pathways for Inducible Nitric Oxide Synthase and TNF-α Expression in RAW264.7 Cells.
RELA	5970	9060688	DENV1	HepG2	Immunofluorescence microscopy, Western blot, EMSA	Dengue virus replication in human hepatoma cells activates NF-kappaB which in turn induces apoptotic cell death.
RELA	5970	10954569	DENV2	Human neuroblastoma cell line SK-N-SH	NF-kB activation assay	Potential dengue virus-triggered apoptotic pathway in human neuroblastoma cells: arachidonic acid, superoxide anion, and NF-kappaB are sequentially involved.
RELA	5970	16544247	DENV2	293A	Inhibition assay, Luciferase reporter gene assay	Cell Type–Specific Mechanisms of Interleukin-8 Induction by Dengue Virus and Differential Response to Drug Treatment
RELA	5970	18449425	DENV2	HUVEC	Immunofluorscence microscopy	Crosstalk between coagulation and inflammation during Dengue virus infection
RELA	5970	19862774	DENV2	Human Monocyte-derived Dendritic cells	EMSA	Triggering of DC migration by dengue virus stimulation of COX-2-dependent signaling cascades in vitro highlights the significance of these cascades beyond inflammation.
RELA	5970	22927911	DENV2	Human bone-marrow–derived dendritic cells	Luciferase reporter assay, Immunofluorescence microscopy	Dengue virus serotype 2 blocks extracellular signal-regulated kinase and nuclear factor-κB activation to downregulate cytokine production.
RELA	5970	25521078	DENV2	Human Monocyte derived Dendritic cells	Enrichment analysis of transcription factors activating the DEGs	Cellular Oxidative Stress Response Controls the Antiviral and Apoptotic Programs in Dengue Virus-Infected Dendritic Cells
RELA	5970	26199460	DENV2	RAW264.7	Western blot, Luciferase reporter assay, Immunofluorescence microscopy, Inhibition studies	Dengue Virus Infection Causes the Activation of Distinct NF-κB Pathways for Inducible Nitric Oxide Synthase and TNF-α Expression in RAW264.7 Cells.
RELB	5971	10954569	DENV2	Human neuroblastoma cell line SK-N-SH	NF-kB activation assay	Potential dengue virus-triggered apoptotic pathway in human neuroblastoma cells: arachidonic acid, superoxide anion, and NF-kappaB are sequentially involved.
RELB	5971	26199460	DENV2	RAW264.7	Western blot, Luciferase reporter assay, Immunofluorescence microscopy, Inhibition studies	Dengue Virus Infection Causes the Activation of Distinct NF-κB Pathways for Inducible Nitric Oxide Synthase and TNF-α Expression in RAW264.7 Cells.
RIPK1	8737	25521078	DENV2	Human Monocyte derived Dendritic cells	Quantitative real-time PCR	Cellular Oxidative Stress Response Controls the Antiviral and Apoptotic Programs in Dengue Virus-Infected Dendritic Cells
RIPK2	8767	14981762	DENV2	ECV304	DD-RT-PCR, Real time PCR	Differential display RT-PCR analysis of ECV304 endothelial-like cells infected with dengue virus type 2 reveals messenger RNA expression profiles of multiple human genes involved in known and novel roles.
RNASEK	440400	26212330	DENV2, DENV3, DENV4	HeLa	Western blot, siRNA	RNASEK Is a V-ATPase-Associated Factor Required for Endocytosis and the Replication of Rhinovirus, Influenza A Virus, and Dengue Virus.
RNASEL	6041	11689052	DENV2, DENV3	HepG2, K562	Knockout studies	Interferon inhibits dengue virus infection by preventing translation of viral RNA through a PKR-independent mechanism.
RNASEL	6041	19923450	DENV2	A549	Over expression studies, Mutational studies	Distinct antiviral roles for human 2',5'-oligoadenylate synthetase family members against dengue virus infection.
ROCK1	6093	23737341	DENV2	ECV304	Indirect Immunofluorescence Staining, Western blotting	ROCK is involved in vimentin phosphorylation and rearrangement induced by dengue virus.
RPSA	3921	15507651	DENV1	Vero	Virus overlay protein binding assay, Nondenaturing and denaturing gel systems with mass spectrometry	Serotype-specific entry of dengue virus into liver cells: identification of the 37-kilodalton/67-kilodalton high-affinity laminin receptor as a dengue virus serotype 1 receptor.
RPSA	3921	15790424	DENV1, DENV2, DENV3, DENV4	Porcine kidney cell line PS Clone D cell line	Virus overlay protein binding assay, MALDI-TOF MS	Two dimensional VOPBA reveals laminin receptor (LAMR1) interaction with dengue virus serotypes 1, 2 and 3.
RSAD2	91543	20534863	DENV1	HEK293-derived cell line FLP-IN T Rex (Invitrogen)	Overexpression studies, siRNA studies	Identification of five interferon-induced cellular proteins that inhibit west nile virus and dengue virus infections.
RSAD2	91543	25521078	DENV2	Human Monocyte derived Dendritic cells	Quantitative real-time PCR	Cellular Oxidative Stress Response Controls the Antiviral and Apoptotic Programs in Dengue Virus-Infected Dendritic Cells
RSAD2	91543	25902155	DENV2	HUVEC	RT-PCR	Dengue Virus Infection of Primary Endothelial Cells Induces Innate Immune Responses, Changes in Endothelial Cells Function and Is Restricted by Interferon-Stimulated Responses
SCARB1	949	23894648	DENV2	Vero, AD-293, Huh-7, HepG2	Co-immunoprecipitation, siRNA, FACs analysis after virus absorption	Human apolipoprotein A-I is associated with dengue virus and enhances virus infection through SR-BI.
SDC2	6383	22170634	DENV2	293	siRNA, virus binding and infectivity assays, RT-PCR	Dengue virus strain DEN2 16681 utilizes a specific glycochain of syndecan-2 proteoglycan as a receptor.
SEC61B	10952	19396146	DENV2	Huh7	siRNA	Discovery of insect and human dengue virus host factors.
SELE	6401	22129847	DENV2	Human microvascular endothelial cells (HMVEC)	qRT-PCR, Western blot	Dengue hemorrhagic fever-associated immunomediators induced via maturation of dengue virus nonstructural 4B protein in monocytes modulate endothelial cell adhesion molecules and human microvascular endothelial cells permeability.
SERPINE1	5054	11170065	DF, DHF and DSS	Serial blood samples	PAI-1 antigen assay	Activation of Coagulation and Fibrinolysis During Dengue Virus Infection
SHPK	23729	25046486	DENV2	Huh7	siRNA	Kinome siRNA screen identifies novel cell-type specific dengue host target genes.
SIK3	23387	25046486	DENV2	Huh7	siRNA	Kinome siRNA screen identifies novel cell-type specific dengue host target genes.
SLC2A1	6513	25505078	DENV2	Primary human foreskin fibroblasts (HFFs)	Western blotting, qRT-PCR	Dengue virus induces and requires glycolysis for optimal replication.
SLC5A12	159963	19396146	DENV2	Huh7	siRNA	Discovery of insect and human dengue virus host factors.
SMAD7	4092	25046486	DENV2	Huh7	siRNA	Kinome siRNA screen identifies novel cell-type specific dengue host target genes.
SOCS1	8651	20158392	ADE DENV2	THP-1	Real-time RT-PCR	Mechanisms of immune evasion induced by a complex of dengue virus and preexisting enhancing antibodies.
SOCS3	9021	20158392	ADE DENV2	THP-1	Real-time RT-PCR, Western blotting	Mechanisms of immune evasion induced by a complex of dengue virus and preexisting enhancing antibodies.
SOD2	6648	25521078	DENV2	Human Monocyte derived Dendritic cells	Quantitative real-time PCR	Cellular Oxidative Stress Response Controls the Antiviral and Apoptotic Programs in Dengue Virus-Infected Dendritic Cells
SP1	6667	20158392	ADE DENV2	THP-1	cDNA array	Mechanisms of immune evasion induced by a complex of dengue virus and preexisting enhancing antibodies.
SPHK1	8877	25902155	DENV2	HUVEC	Sphingosine kinase 1 activity assay	Dengue Virus Infection of Primary Endothelial Cells Induces Innate Immune Responses, Changes in Endothelial Cells Function and Is Restricted by Interferon-Stimulated Responses
SPP1	6696	24861695	DF, DHF	Patients sera	ELISA	Elevated levels of full-length and thrombin-cleaved osteopontin during acute dengue virus infection are associated with coagulation abnormalities.
SQSTM1	8878	25521078	DENV2	Human Monocyte derived Dendritic cells	Quantitative real-time PCR	Cellular Oxidative Stress Response Controls the Antiviral and Apoptotic Programs in Dengue Virus-Infected Dendritic Cells
SQSTM1	8878	26018155	DENV2	Huh7	RT-qPCR, Confocal microscopy	Dengue Virus Inhibition of Autophagic Flux and Dependency of Viral Replication on Proteasomal Degradation of the Autophagy Receptor p62.
SRC	6714	26039671	DENV2	Vero	Molecular modeling, Autodock Vina docking, Glide docking, In vitro Kinase inhibition assay, viral inhibition by RT-PCR	Discovery of Multitarget Antivirals Acting on Both the Dengue Virus NS5-NS3 Interaction and the Host Src/Fyn Kinases
STAT1	6772	15944325	DENV2	Human Monocyte-derived dendritic cells	EMSA	Dengue Virus Type 2 Antagonizes IFN-α but Not IFN-γ Antiviral Effect via Down-Regulating Tyk2-STAT Signaling in the Human Dendritic Cell
STAT1	6772	17251552	DENV2	THP-1	Antibody-dependent enhancement (ADE) infection assay, Western blotting	Dengue virus (DENV) antibody-dependent enhancement of infection upregulates the production of anti-inflammatory cytokines, but suppresses anti-DENV free radical and pro-inflammatory cytokine production, in THP-1 cells
STAT1	6772	24992036	DENV2	HuH-7	Western blotting	G3BP1, G3BP2 and CAPRIN1 are required for translation of interferon stimulated mRNAs and are targeted by a dengue virus non-coding RNA.
STAT1	6772	25521078	DENV2	Human Monocyte derived Dendritic cells	Enrichment analysis of transcription factors activating the DEGs	Cellular Oxidative Stress Response Controls the Antiviral and Apoptotic Programs in Dengue Virus-Infected Dendritic Cells
STAT1	6772	25902155	DENV2	HUVEC	Western blotting	Dengue Virus Infection of Primary Endothelial Cells Induces Innate Immune Responses, Changes in Endothelial Cells Function and Is Restricted by Interferon-Stimulated Responses
STAT2	6773	22908290	DENV2	Huh7, AG129	ISG inhibition assays	Dengue reporter viruses reveal viral dynamics in interferon receptor-deficient mice and sensitivity to interferon effectors in vitro.
STAT2	6773	24223959	DENV2	A549	qRT-PCR, siRNA	Protective roles of interferon-induced protein with tetratricopeptide repeats 3 (IFIT3) in dengue virus infection of human lung epithelial cells.
STAT3	6774	15944325	DENV2	Human Monocyte-derived dendritic cells	EMSA	Dengue Virus Type 2 Antagonizes IFN-α but Not IFN-γ Antiviral Effect via Down-Regulating Tyk2-STAT Signaling in the Human Dendritic Cell
STAT3	6773	21893572	DENV2	HepG2	EMSA, Western blotting	Janus kinase/signal transducer and activator of transcription 3 signaling pathway is crucial in chemokine production from hepatocytes infected by dengue virus.
STAU1	6780	20122152	DENV1, DENV2, DENV3, DENV4	Huh7, HepG2	siRNA	Small interference RNA profiling reveals the essential role of human membrane trafficking genes in mediating the infectious entry of dengue virus.
STK32B	55351	25046486	DENV2	Huh7	siRNA	Kinome siRNA screen identifies novel cell-type specific dengue host target genes.
STMN1	3925	25181337	DENV2	EAhy926	qRT-PCR, Westerblotting	miR-223 inhibits dengue virus replication by negatively regulating the microtubule-destabilizing protein STMN1 in EAhy926 cells.
STYK1	55359	25046486	DENV2	Huh7	siRNA	Kinome siRNA screen identifies novel cell-type specific dengue host target genes.
SYK	6850	26032420	DENV2	Human primary monocytes	Real-time PCR, Western blot	Spleen Tyrosine Kinase (Syk) Mediates IL-1β Induction by Primary Human Monocytes during Antibody-enhanced Dengue Virus Infection.
SYNGR1	9145	19396146	DENV2	Huh7	siRNA	Discovery of insect and human dengue virus host factors.
SYNJ1	8867	20122152	DENV1, DENV2, DENV3, DENV4	Huh7, HepG2	siRNA	Small interference RNA profiling reveals the essential role of human membrane trafficking genes in mediating the infectious entry of dengue virus.
SYNJ2	8871	20122152	DENV1, DENV2, DENV3, DENV4	Huh7, HepG2	siRNA	Small interference RNA profiling reveals the essential role of human membrane trafficking genes in mediating the infectious entry of dengue virus.
TABP	6892	25981524	DENV1, DENV2, DENV3, DENV4	HepG2	RT-PCR, Western blotting	Different serotypes of dengue viruses differently regulate the expression of the host cell antigen processing machinery
TAP1	6890	25981524	DENV2	HepG2	RT-PCR, Western blotting	Different serotypes of dengue viruses differently regulate the expression of the host cell antigen processing machinery
TAZ	6901	19396146	DENV2	Huh7	siRNA	Discovery of insect and human dengue virus host factors.
TBX20	57057	19396146	DENV2	Huh7	siRNA	Discovery of insect and human dengue virus host factors.
TESK2	10420	25046486	DENV2	Huh7	siRNA	Kinome siRNA screen identifies novel cell-type specific dengue host target genes.
TF	7018	25349378		Patients sera	Surface-enhanced laser desorption/ionization time-of-flight mass spectrometry, ELISA, Western blotting	Discovery and characterization of potential prognostic biomarkers for dengue hemorrhagic fever.
TFPI	7035	17573116	DENV2	HUVEC	RT-PCR	Dengue virus regulates the expression of hemostasis-related molecules in human vein endothelial cells
THBD	7056	17573116	DENV2	HUVEC	RT-PCR	Dengue virus regulates the expression of hemostasis-related molecules in human vein endothelial cells
THBD	7056	23383040	DHF, DENV2	THP-1, HUVEC, DHF Patient sera	RT-PCR, ELISA, FACS	Dengue virus enhances thrombomodulin and ICAM-1 expression through the macrophage migration inhibitory factor induction of the MAPK and PI3K signaling pathways.
THBD	7056	24861695	DF, DHF	Patients sera	ELISA	Elevated levels of full-length and thrombin-cleaved osteopontin during acute dengue virus infection are associated with coagulation abnormalities.
TIMD4	91937	23084921	DENV1, DENV2, DENV3, DENV4	293T, CHO745, Cos-7, A549, Vero, Huh7 5.1	Cell-Binding Assay, siRNA, Immunofluroscence assay	The TIM and TAM families of phosphatidylserine receptors mediate dengue virus entry.
TIRAP	114609	14981762	DENV2	ECV304	DD-RT-PCR, Real time PCR	Differential display RT-PCR analysis of ECV304 endothelial-like cells infected with dengue virus type 2 reveals messenger RNA expression profiles of multiple human genes involved in known and novel roles.
TJP1	7082	19281230	DENV2	EA.hy926	Western blot, Confocal Laser Scanning Microscopy	Alterations in actin cytoskeletal assembly and junctional protein complexes in human endothelial cells induced by dengue virus infection and mimicry of leukocyte transendothelial migration
TJP2	9414	23616663	DENV4	U937, MDCK	Immunofluorescence microscopy, Western blot, Transepithelial electrical resistance assay, Transmission electron microscopy, Vascular permeability assay	The cytokine response of U937-derived macrophages infected through antibody-dependent enhancement of dengue virus disrupts cell apical-junction complexes and increases vascular permeability.
TKFC	26007	20158392	ADE DENV2	THP-1	Western blotting	Mechanisms of immune evasion induced by a complex of dengue virus and preexisting enhancing antibodies.
TLR2	7097	20113369	DENV2	Patient blood samples, PBMCs	FACS	Differential regulation of toll-like receptor-2, toll-like receptor-4, CD16 and human leucocyte antigen-DR on peripheral blood monocytes during mild and severe dengue fever.
TLR3	7098	19134117	DENV2	293, THP1, U937	FACS, Real time RT-PCR, knockdown assay	Human TLR3 recognizes dengue virus and modulates viral replication in vitro.
TLR3	7098	21245912	DENV1	Macrophages, Huh-7 and shRIG-I cells	RT-PCR, siRNA, Western blot, ELISA, Immunofluorescence microscopy	RIG-I, MDA5 and TLR3 synergistically play an important role in restriction of dengue virus infection.
TLR3	7098	21829730	DENV2	HepG2	RT-PCR, Immunofluorescence microscopy	Activation of Toll-like receptor 3 impairs the dengue virus serotype 2 replication through induction of IFN-β in cultured hepatoma cells.
TLR4	7099	20113369	DENV2	Patient blood samples, PBMCs	FACS	Differential regulation of toll-like receptor-2, toll-like receptor-4, CD16 and human leucocyte antigen-DR on peripheral blood monocytes during mild and severe dengue fever.
TLR6	10333	25046486	DENV2	Huh7	siRNA	Kinome siRNA screen identifies novel cell-type specific dengue host target genes.
TNF	7124	15304247	DF Grade I, DF Grade II	Serial blood samples	ELISA	Systemic host inflammatory and coagulation response in the Dengue virus primo-infection
TNF	7124	17251552	DENV2	THP-1	Antibody-dependent enhancement (ADE) infection assay, ELISA	Dengue virus (DENV) antibody-dependent enhancement of infection upregulates the production of anti-inflammatory cytokines, but suppresses anti-DENV free radical and pro-inflammatory cytokine production, in THP-1 cells
TNF	7124	19530939	DENV2	HUVECs	qRT-PCR	Dengue virus infection differentially regulates endothelial barrier function over time through type I interferon effects.
TNF	7124	19733377	DENV2, DENV3, DENV4	Serum of DF and DHF patient	ELISA	Increment of interleukin 6, tumour necrosis factor alpha, nitric oxide, C-reactive protein and apoptosis in dengue.
TNF	7124	22927911	DENV2	Human bone-marrow–derived dendritic cells	qPCR	Dengue virus serotype 2 blocks extracellular signal-regulated kinase and nuclear factor-κB activation to downregulate cytokine production.
TNF	7124	23616663	DENV4	U937, MDCK	BD cytometric bead array	The cytokine response of U937-derived macrophages infected through antibody-dependent enhancement of dengue virus disrupts cell apical-junction complexes and increases vascular permeability.
TNF	7124	25521078	DENV2	Human Monocyte derived Dendritic cells	Inhibition followed by Fluidigm BioMark high throughput qPCR assay	Cellular Oxidative Stress Response Controls the Antiviral and Apoptotic Programs in Dengue Virus-Infected Dendritic Cells
TNF	7124	26199460	DENV2	RAW264.7	ELISA, Western blotting	Dengue Virus Infection Causes the Activation of Distinct NF-κB Pathways for Inducible Nitric Oxide Synthase and TNF-α Expression in RAW264.7 Cells.
TNFRSF9	3604	23557259	DENV2	HepG2	siRNA	Inhibition of p38MAPK and CD137 signaling reduce dengue virus-induced TNF-α secretion and apoptosis.
TNFSF10	8743	23755314	DENV2	Human plasmacytoid dendritic cells extracted from Healthy controls and Dengue patients	Flow Cytometry, Three dimension microscopy and immunofluorescence	Dengue virus activates membrane TRAIL relocalization and IFN-α production by human plasmacytoid dendritic cells in vitro and in vivo.
TNFSF13B	10673	22496214	DENV4	HUVEC	ELISA	Endothelial cells elicit immune-enhancing responses to dengue virus infection.
TP53	7157	18606243	DENV1	BHK, Huh-7, Vero	TUNEL assay, FACS, Western blot, Mutational analysis	Induction of p53-dependent and mitochondria-mediated cell death pathway by dengue virus infection of human and animal cells.
TP53	7157	19382257	DENV1	p53-deficient H1299, Huh7	siRNA, Real time RT-PCR	Gene expression profiling by microarray analysis reveals an important role for caspase-1 in dengue virus-induced p53-mediated apoptosis.
TP53	7157	25521078	DENV2	Human Monocyte derived Dendritic cells	Enrichment analysis of transcription factors activating the DEGs	Cellular Oxidative Stress Response Controls the Antiviral and Apoptotic Programs in Dengue Virus-Infected Dendritic Cells
TRAPPC10	7109	14981762	DENV2	ECV304	DD-RT-PCR, Real time PCR	Differential display RT-PCR analysis of ECV304 endothelial-like cells infected with dengue virus type 2 reveals messenger RNA expression profiles of multiple human genes involved in known and novel roles.
TREM1	54210	24447863		Monocytes, Neutrophils and Sera of dengue patients	Flow Cytometry	TREM-1 modulation during early stages of dengue virus infection.
TRIM56	81844	25253338	DENV2	293, HeLa	Over expression studies, siRNA	Overlapping and distinct molecular determinants dictating the antiviral activities of TRIM56 against flaviviruses and coronavirus.
TTK	7272	25046486	DENV2	Huh7	siRNA	Kinome siRNA screen identifies novel cell-type specific dengue host target genes.
TUBE1	51175	14981762	DENV2	ECV304	DD-RT-PCR, Real time PCR	Differential display RT-PCR analysis of ECV304 endothelial-like cells infected with dengue virus type 2 reveals messenger RNA expression profiles of multiple human genes involved in known and novel roles.
TXNRD1	7296	25521078	DENV2	Human Monocyte derived Dendritic cells	Quantitative real-time PCR	Cellular Oxidative Stress Response Controls the Antiviral and Apoptotic Programs in Dengue Virus-Infected Dendritic Cells
TYK2	7297	15944325	DENV2	Human Monocyte-derived dendritic cells	Western blotting	Dengue Virus Type 2 Antagonizes IFN-α but Not IFN-γ Antiviral Effect via Down-Regulating Tyk2-STAT Signaling in the Human Dendritic Cell
TYRO3	7301	23084921	DENV1, DENV2, DENV3, DENV4	293T, CHO745, Cos-7, A549, Vero, Huh7 5.1	Cell-Binding Assay, siRNA, Immunofluroscence assay	The TIM and TAM families of phosphatidylserine receptors mediate dengue virus entry.
TYROBP	7305	18496526	DENV1, DENV2, DENV3, DENV4	Human Macrophage, Mice	Western blot, Confocal microscopy, FACS, ELISA	CLEC5A is critical for dengue-virus-induced lethal disease
UBE2E3	10477	19396146	DENV2	Huh7	siRNA	Discovery of insect and human dengue virus host factors.
UGP2	7360	25046486	DENV2	Huh7	siRNA	Kinome siRNA screen identifies novel cell-type specific dengue host target genes.
UHMK1	127933	25046486	DENV2	Huh7	siRNA	Kinome siRNA screen identifies novel cell-type specific dengue host target genes.
USP13	8975	23940278	DENV2	293T	siRNA, Immunoprecipitation-immunoblotting analysis, qRT-PCR	Ubiquitin-specific protease 13 regulates IFN signaling by stabilizing STAT1.
USP14	9097	22306365	DENV2	293T	Inhibition assay	A small-molecule inhibitor of deubiquitinating enzyme USP14 inhibits Dengue virus replication.
VCAM1	7412	18449425	DENV2	HUVEC	FACs	Crosstalk between coagulation and inflammation during Dengue virus infection
VCAM1	7412	21068256		Cord blood-derived mast cells (CBMCs), human mast cell-like line (HMC-1 ), HUVEC	ELISA	Dengue virus infection of mast cells triggers endothelial cell activation.
VCAM1	7412	22129847	DENV2	Human microvascular endothelial cells (HMVEC)	qRT-PCR, Western blot	Dengue hemorrhagic fever-associated immunomediators induced via maturation of dengue virus nonstructural 4B protein in monocytes modulate endothelial cell adhesion molecules and human microvascular endothelial cells permeability.
VEGFA	7422	19419573	DENV1, DENV2, DENV3, DENV4	HPMEC-ST1.6R	Microbead-based Bio-Plex immunoassay	Profile of time-dependent VEGF upregulation in human pulmonary endothelial cells, HPMEC-ST1.6R infected with DENV-1, -2, -3, and -4 viruses.
VEGFC	7424	24928471	Patients with and without plasma leakage	Patient blood samples	ELISA	Serum angiopoietin-2 and soluble VEGF receptor 2 are surrogate markers for plasma leakage in patients with acute dengue virus infection.
VIM	7431	23737341	DENV2	ECV304	Indirect Immunofluorescence Staining, Western blotting	ROCK is involved in vimentin phosphorylation and rearrangement induced by dengue virus.
VTN	7448	25349378		Patients sera	Surface-enhanced laser desorption/ionization time-of-flight mass spectrometry, ELISA, Western blotting	Discovery and characterization of potential prognostic biomarkers for dengue hemorrhagic fever.
WASF2	10163	20122152	DENV1, DENV2, DENV3, DENV4	Huh7, HepG2	siRNA	Small interference RNA profiling reveals the essential role of human membrane trafficking genes in mediating the infectious entry of dengue virus.
XAF1	54739	23207547	DENV2	HUVECs, EA.hy926	Microarray, quantitative reverse transcriptase–polymerase chain reaction (qRT-PCR), Western blot analysis, Colocalization by confocal microscopy, Coimmunoprecipitation, overexpression analysis, knockdown analysis	XAF1 contributes to dengue virus-induced apoptosis in vascular endothelial cells.
XAF1	54739	25138703	DENV2	HUVEC, EA.hy926	Knockdown analysis, expression analysis	Coordinated regulation of autophagy and apoptosis determines endothelial cell fate during Dengue virus type 2 infection.
XAF1	54739	26244642	DENV2	HUVEC, EA.hy926	Western blotting	IFI6 Inhibits Apoptosis via Mitochondrial-Dependent Pathway in Dengue Virus 2 Infected Vascular Endothelial Cells.
XBP1	7494	17888185	DENV1, DENV2	A549	Western blot, RT-PCR, inhibition assays	Dengue virus serotype infection specifies the activation of the unfolded protein response.
XBP1	7494	20855599	DENV2	Huh-7.5, 293T	siRNA	Dengue virus nonstructural protein 3 redistributes fatty acid synthase to sites of viral replication and increases cellular fatty acid synthesis.
XBP1	7494	21385877	DENV2	Human fibrosarcoma 2fTGH cells, MEF	Western blottting	Dengue virus modulates the unfolded protein response in a time-dependent manner.
XBP1	7494	24034452	DENV2	HepG2	Real time PCR	Dengue 2 infection of HepG2 liver cells results in endoplasmic reticulum stress and induction of multiple pathways of cell death.
XIAP	331	23207547	DENV2	HUVECs, EA.hy926	Microarray, quantitative reverse transcriptase–polymerase chain reaction (qRT-PCR), Western blot analysis, Colocalization by confocal microscopy, Coimmunoprecipitation, overexpression analysis, knockdown analysis	XAF1 contributes to dengue virus-induced apoptosis in vascular endothelial cells.
ZBTB41	360023	19396146	DENV2	Huh7	siRNA	Discovery of insect and human dengue virus host factors.
ZNF91	7644	19396146	DENV2	Huh7	siRNA	Discovery of insect and human dengue virus host factors.

## Sheet: Differential-Expressed-Genes
Human Gene symbol	Human gene Entrez Id	Pubmed Id	Patient type or Serotype	System	Experiment	Comparision	Variation	Title	GEO Datasets
ABCC9	10060	16112753	DENV2	ECV304	Microarray	Dengue infected ECV304 endothelial-like cells vs unifected cells	down	Microarray and real-time RT-PCR analyses of a novel set of differentially expressed human genes in ECV304 endothelial-like cells infected with dengue virus type 2.	-
ACTA2	59	16112753	DENV2	ECV304	Microarray	Dengue infected ECV304 endothelial-like cells vs unifected cells	down	Microarray and real-time RT-PCR analyses of a novel set of differentially expressed human genes in ECV304 endothelial-like cells infected with dengue virus type 2.	-
AGPAT1	10554	16112753	DENV2	ECV304	Microarray	Dengue infected ECV304 endothelial-like cells vs unifected cells	down	Microarray and real-time RT-PCR analyses of a novel set of differentially expressed human genes in ECV304 endothelial-like cells infected with dengue virus type 2.	-
AGT	183	16112753	DENV2	ECV304	Microarray	Dengue infected ECV304 endothelial-like cells vs unifected cells	up	Microarray and real-time RT-PCR analyses of a novel set of differentially expressed human genes in ECV304 endothelial-like cells infected with dengue virus type 2.	-
AIFM1	9131	16112753	DENV2	ECV304	Microarray	Dengue infected ECV304 endothelial-like cells vs unifected cells	up	Microarray and real-time RT-PCR analyses of a novel set of differentially expressed human genes in ECV304 endothelial-like cells infected with dengue virus type 2.	-
AKAP11	11215	16112753	DENV2	ECV304	Microarray	Dengue infected ECV304 endothelial-like cells vs unifected cells	down	Microarray and real-time RT-PCR analyses of a novel set of differentially expressed human genes in ECV304 endothelial-like cells infected with dengue virus type 2.	-
AMOTL2	51421	16112753	DENV2	ECV304	Microarray	Dengue infected ECV304 endothelial-like cells vs unifected cells	down	Microarray and real-time RT-PCR analyses of a novel set of differentially expressed human genes in ECV304 endothelial-like cells infected with dengue virus type 2.	-
AP4M1	9179	16112753	DENV2	ECV304	Microarray	Dengue infected ECV304 endothelial-like cells vs unifected cells	up	Microarray and real-time RT-PCR analyses of a novel set of differentially expressed human genes in ECV304 endothelial-like cells infected with dengue virus type 2.	-
APOBEC1	339	16112753	DENV2	ECV304	Microarray	Dengue infected ECV304 endothelial-like cells vs unifected cells	down	Microarray and real-time RT-PCR analyses of a novel set of differentially expressed human genes in ECV304 endothelial-like cells infected with dengue virus type 2.	-
AQP2	359	16112753	DENV2	ECV304	Microarray	Dengue infected ECV304 endothelial-like cells vs unifected cells	down	Microarray and real-time RT-PCR analyses of a novel set of differentially expressed human genes in ECV304 endothelial-like cells infected with dengue virus type 2.	-
ARL2	402	16112753	DENV2	ECV304	Microarray	Dengue infected ECV304 endothelial-like cells vs unifected cells	down	Microarray and real-time RT-PCR analyses of a novel set of differentially expressed human genes in ECV304 endothelial-like cells infected with dengue virus type 2.	-
ARL5A	26225	16112753	DENV2	ECV304	Microarray	Dengue infected ECV304 endothelial-like cells vs unifected cells	down	Microarray and real-time RT-PCR analyses of a novel set of differentially expressed human genes in ECV304 endothelial-like cells infected with dengue virus type 2.	-
ATF3	467	19382257	DENV1	p53-deficient H1299	Microarray	Dengue infected p53-knockin cell line, H273 vs uninfected cell line	up	Gene expression profiling by microarray analysis reveals an important role for caspase-1 in dengue virus-induced p53-mediated apoptosis.	-
ATF5	22809	19382257	DENV1	p53-deficient H1299	Microarray	Dengue infected p53-knockin cell line, H273 vs uninfected cell line	up	Gene expression profiling by microarray analysis reveals an important role for caspase-1 in dengue virus-induced p53-mediated apoptosis.	-
BCL3	602	18455750	DENV2	THP1	Microarray	THP1 cells infected with NO-sensitive viruses (isolated from DF patients) vs uninfected cells	up	Clinical isolates of dengue virus with distinctive susceptibility to nitric oxide radical induce differential gene responses in THP-1 cells.	-
BDKRB1	623	16112753	DENV2	ECV304	Microarray	Dengue infected ECV304 endothelial-like cells vs unifected cells	down	Microarray and real-time RT-PCR analyses of a novel set of differentially expressed human genes in ECV304 endothelial-like cells infected with dengue virus type 2.	-
BIRC3	330	14557666	DENV2	HUVEC	Microarray	Dengue infected HUVECs vs uninfected cells	up	Dengue virus induces novel changes in gene expression of human umbilical vein endothelial cells.	-
BIRC3	330	19382257	DENV1	p53-deficient H1299	Microarray	Dengue infected p53-knockin cell line, H273 vs uninfected cell line	up	Gene expression profiling by microarray analysis reveals an important role for caspase-1 in dengue virus-induced p53-mediated apoptosis.	-
BLZF1	8548	19382257	DENV1	p53-deficient H1299	Microarray	Dengue infected p53-knockin cell line, H273 vs uninfected cell line	up	Gene expression profiling by microarray analysis reveals an important role for caspase-1 in dengue virus-induced p53-mediated apoptosis.	-
BNIP3	664	19382257	DENV1	p53-deficient H1299	Microarray	Dengue infected p53-deficient cell line H1299 vs uninfected cell line	up	Gene expression profiling by microarray analysis reveals an important role for caspase-1 in dengue virus-induced p53-mediated apoptosis.	-
BST2	684	19382257	DENV1	p53-deficient H1299	Microarray	Dengue infected p53-deficient cell line H1299 vs uninfected cell line	up	Gene expression profiling by microarray analysis reveals an important role for caspase-1 in dengue virus-induced p53-mediated apoptosis.	-
BST2	684	19382257	DENV1	p53-deficient H1299	Microarray	Dengue infected p53-knockin cell line, H273 vs uninfected cell line	up	Gene expression profiling by microarray analysis reveals an important role for caspase-1 in dengue virus-induced p53-mediated apoptosis.	-
BTG1	694	16112753	DENV2	ECV304	Microarray	Dengue infected ECV304 endothelial-like cells vs unifected cells	down	Microarray and real-time RT-PCR analyses of a novel set of differentially expressed human genes in ECV304 endothelial-like cells infected with dengue virus type 2.	-
BTN3A1	11119	19382257	DENV1	p53-deficient H1299	Microarray	Dengue infected p53-knockin cell line, H273 vs uninfected cell line	up	Gene expression profiling by microarray analysis reveals an important role for caspase-1 in dengue virus-induced p53-mediated apoptosis.	-
BTN3A3	10384	19382257	DENV1	p53-deficient H1299	Microarray	Dengue infected p53-knockin cell line, H273 vs uninfected cell line	up	Gene expression profiling by microarray analysis reveals an important role for caspase-1 in dengue virus-induced p53-mediated apoptosis.	-
C19orf66	55337	19382257	DENV1	p53-deficient H1299	Microarray	Dengue infected p53-knockin cell line, H273 vs uninfected cell line	up	Gene expression profiling by microarray analysis reveals an important role for caspase-1 in dengue virus-induced p53-mediated apoptosis.	-
C21orf91	54149	19382257	DENV1	p53-deficient H1299	Microarray	Dengue infected p53-knockin cell line, H273 vs uninfected cell line	up	Gene expression profiling by microarray analysis reveals an important role for caspase-1 in dengue virus-induced p53-mediated apoptosis.	-
C5	727	16112753	DENV2	ECV304	Microarray	Dengue infected ECV304 endothelial-like cells vs unifected cells	down	Microarray and real-time RT-PCR analyses of a novel set of differentially expressed human genes in ECV304 endothelial-like cells infected with dengue virus type 2.	-
CACNB3	784	16112753	DENV2	ECV304	Microarray	Dengue infected ECV304 endothelial-like cells vs unifected cells	down	Microarray and real-time RT-PCR analyses of a novel set of differentially expressed human genes in ECV304 endothelial-like cells infected with dengue virus type 2.	-
CASP1	834	19382257	DENV1	p53-deficient H1299	Microarray	Dengue infected p53-knockin cell line, H273 vs uninfected cell line	up	Gene expression profiling by microarray analysis reveals an important role for caspase-1 in dengue virus-induced p53-mediated apoptosis.	-
CBX2	84733	16112753	DENV2	ECV304	Microarray	Dengue infected ECV304 endothelial-like cells vs unifected cells	down	Microarray and real-time RT-PCR analyses of a novel set of differentially expressed human genes in ECV304 endothelial-like cells infected with dengue virus type 2.	-
CCL1	6346	15584975	DENV2	Human monocyte derived macrophages	Microarray	Dengue infected Human monocyte derived macrophages 6hr vs Dengue uninfected cells	up	Gene Expression in Human Macrophages Infected with Dengue Virus Serotype-2	-
CCL16	6360	15584975	DENV2	Human monocyte derived macrophages	Microarray	Dengue infected Human monocyte derived macrophages 6hr vs Dengue uninfected cells	up	Gene Expression in Human Macrophages Infected with Dengue Virus Serotype-2	-
CCL2	6347	15584975	DENV2	Human monocyte derived macrophages	Microarray	Dengue infected Human monocyte derived macrophages 6hr vs Dengue uninfected cells	up	Gene Expression in Human Macrophages Infected with Dengue Virus Serotype-2	-
CCL20	6364	16112753	DENV2	ECV304	Microarray	Dengue infected ECV304 endothelial-like cells vs unifected cells	up	Microarray and real-time RT-PCR analyses of a novel set of differentially expressed human genes in ECV304 endothelial-like cells infected with dengue virus type 2.	-
CCL21	6366	18455750	DENV2	THP1	Microarray	THP1 cells infected with NO-resistance viruses (isolated from DHF patients) vs uninfected cells	up	Clinical isolates of dengue virus with distinctive susceptibility to nitric oxide radical induce differential gene responses in THP-1 cells.	-
CCL22	6367	18455750	DENV2	THP1	Microarray	THP1 cells infected with NO-resistance viruses (isolated from DHF patients) vs uninfected cells	down	Clinical isolates of dengue virus with distinctive susceptibility to nitric oxide radical induce differential gene responses in THP-1 cells.	-
CCL23	6368	15584975	DENV2	Human monocyte derived macrophages	Microarray	Dengue infected Human monocyte derived macrophages 24hr vs Dengue uninfected cells	down	Gene Expression in Human Macrophages Infected with Dengue Virus Serotype-2	-
CCL3	6348	15584975	DENV2	Human monocyte derived macrophages	Microarray	Dengue infected Human monocyte derived macrophages 24hr vs Dengue uninfected cells	down	Gene Expression in Human Macrophages Infected with Dengue Virus Serotype-2	-
CCL4	6351	19551822	DENV2	Human primary B cells	Microarray, qRT-PCR	Dengue infected Human primary B cells	up	Gene expression profiling of dengue infected human primary cells identifies secreted mediators in vivo.	-
CCL4	6351	19551822	DENV2	Human primary dendritic cells	Microarray, qRT-PCR	Dengue infected Human primary dendritic cells	up	Gene expression profiling of dengue infected human primary cells identifies secreted mediators in vivo.	-
CCL4	6351	19551822	DENV2	Human primary monocytes	Microarray, qRT-PCR	Dengue infected Human primary monocytes	up	Gene expression profiling of dengue infected human primary cells identifies secreted mediators in vivo.	-
CCL4	6351	18444802	DF and DHF	Patient Blood	Microarray	patients with dengue fever (DHF) in acute phase vs convalescent phase	up	Differences in global gene expression in peripheral blood mononuclear cells indicate a significant role of the innate responses in progression of dengue fever but not dengue hemorrhagic fever.	-
CCL5	6352	19837110	DENV2	HepG2 cells	Microarray, Real time PCR	Dengue infected HepG2 cells vs uninfected cells	up	Gene expression analysis during dengue virus infection in HepG2 cells reveals virus control of innate immune response.	-
CCL5	6352	19551822	DENV2	Human primary B cells	Microarray, qRT-PCR	Dengue infected Human primary B cells	up	Gene expression profiling of dengue infected human primary cells identifies secreted mediators in vivo.	-
CCL5	6352	19551822	DENV2	Human primary dendritic cells	Microarray, qRT-PCR	Dengue infected Human primary dendritic cells	up	Gene expression profiling of dengue infected human primary cells identifies secreted mediators in vivo.	-
CCL5	6352	19551822	DENV2	Human primary monocytes	Microarray, qRT-PCR	Dengue infected Human primary monocytes	up	Gene expression profiling of dengue infected human primary cells identifies secreted mediators in vivo.	-
CCL5	6352	18444802	DF and DHF	Patient Blood	Microarray	patients with dengue fever (DHF) in acute phase vs convalescent phase	up	Differences in global gene expression in peripheral blood mononuclear cells indicate a significant role of the innate responses in progression of dengue fever but not dengue hemorrhagic fever.	-
CCL5	6352	18455750	DENV2	THP1	Microarray	THP1 cells infected with NO-resistance viruses (isolated from DHF patients) vs uninfected cells	up	Clinical isolates of dengue virus with distinctive susceptibility to nitric oxide radical induce differential gene responses in THP-1 cells.	-
CCL7	6354	18455750	DENV2	THP1	Microarray	THP1 cells infected with NO-resistance viruses (isolated from DHF patients) vs uninfected cells	up	Clinical isolates of dengue virus with distinctive susceptibility to nitric oxide radical induce differential gene responses in THP-1 cells.	-
CCL8	6355	19551822	DENV2	Human primary B cells	Microarray, qRT-PCR	Dengue infected Human primary B cells	up	Gene expression profiling of dengue infected human primary cells identifies secreted mediators in vivo.	-
CCL8	6355	19551822	DENV2	Human primary dendritic cells	Microarray, qRT-PCR	Dengue infected Human primary dendritic cells	up	Gene expression profiling of dengue infected human primary cells identifies secreted mediators in vivo.	-
CCL8	6355	19551822	DENV2	Human primary monocytes	Microarray, qRT-PCR	Dengue infected Human primary monocytes	up	Gene expression profiling of dengue infected human primary cells identifies secreted mediators in vivo.	-
CCR2	729230	18455750	DENV2	THP1	Microarray	THP1 cells infected with NO-resistance viruses (isolated from DHF patients) vs uninfected cells	down	Clinical isolates of dengue virus with distinctive susceptibility to nitric oxide radical induce differential gene responses in THP-1 cells.	-
CCR6	1235	18455750	DENV2	THP1	Microarray	THP1 cells infected with NO-resistance viruses (isolated from DHF patients) vs uninfected cells	down	Clinical isolates of dengue virus with distinctive susceptibility to nitric oxide radical induce differential gene responses in THP-1 cells.	-
CCR7	1236	16112753	DENV2	ECV304	Microarray	Dengue infected ECV304 endothelial-like cells vs unifected cells	down	Microarray and real-time RT-PCR analyses of a novel set of differentially expressed human genes in ECV304 endothelial-like cells infected with dengue virus type 2.	-
CCR9	10803	18455750	DENV2	THP1	Microarray	THP1 cells infected with NO-sensitive viruses (isolated from DF patients) vs uninfected cells	down	Clinical isolates of dengue virus with distinctive susceptibility to nitric oxide radical induce differential gene responses in THP-1 cells.	-
CD14	929	18455750	DENV2	THP1	Microarray	THP1 cells infected with NO-resistance viruses (isolated from DHF patients) vs uninfected cells	up	Clinical isolates of dengue virus with distinctive susceptibility to nitric oxide radical induce differential gene responses in THP-1 cells.	-
CD151	977	16112753	DENV2	ECV304	Microarray	Dengue infected ECV304 endothelial-like cells vs unifected cells	down	Microarray and real-time RT-PCR analyses of a novel set of differentially expressed human genes in ECV304 endothelial-like cells infected with dengue virus type 2.	-
CD22	933	18455750	DENV2	THP1	Microarray	THP1 cells infected with NO-resistance viruses (isolated from DHF patients) vs uninfected cells	down	Clinical isolates of dengue virus with distinctive susceptibility to nitric oxide radical induce differential gene responses in THP-1 cells.	-
CD27	939	18455750	DENV2	THP1	Microarray	THP1 cells infected with NO-resistance viruses (isolated from DHF patients) vs uninfected cells	up	Clinical isolates of dengue virus with distinctive susceptibility to nitric oxide radical induce differential gene responses in THP-1 cells.	-
CD33	945	18455750	DENV2	THP1	Microarray	THP1 cells infected with NO-resistance viruses (isolated from DHF patients) vs uninfected cells	down	Clinical isolates of dengue virus with distinctive susceptibility to nitric oxide radical induce differential gene responses in THP-1 cells.	-
CD34	947	18455750	DENV2	THP1	Microarray	THP1 cells infected with NO-resistance viruses (isolated from DHF patients) vs uninfected cells	down	Clinical isolates of dengue virus with distinctive susceptibility to nitric oxide radical induce differential gene responses in THP-1 cells.	-
CD40LG	959	18444802	DF and DHF	Patient Blood	Microarray	patients with dengue fever (DHF) in acute phase vs convalescent phase	up	Differences in global gene expression in peripheral blood mononuclear cells indicate a significant role of the innate responses in progression of dengue fever but not dengue hemorrhagic fever.	-
CD40LG	959	18455750	DENV2	THP1	Microarray	THP1 cells infected with NO-sensitive viruses (isolated from DF patients) vs uninfected cells	up	Clinical isolates of dengue virus with distinctive susceptibility to nitric oxide radical induce differential gene responses in THP-1 cells.	-
CD44	960	18455750	DENV2	THP1	Microarray	THP1 cells infected with NO-resistance viruses (isolated from DHF patients) vs uninfected cells	up	Clinical isolates of dengue virus with distinctive susceptibility to nitric oxide radical induce differential gene responses in THP-1 cells.	-
CD53	963	18455750	DENV2	THP1	Microarray	THP1 cells infected with NO-resistance viruses (isolated from DHF patients) vs uninfected cells	up	Clinical isolates of dengue virus with distinctive susceptibility to nitric oxide radical induce differential gene responses in THP-1 cells.	-
CD59	966	18444802	DF and DHF	Patient Blood	Microarray	patients with dengue fever (DF) in acute phase vs convalescent phase	up	Differences in global gene expression in peripheral blood mononuclear cells indicate a significant role of the innate responses in progression of dengue fever but not dengue hemorrhagic fever.	-
CD6	923	18455750	DENV2	THP1	Microarray	THP1 cells infected with NO-resistance viruses (isolated from DHF patients) vs uninfected cells	up	Clinical isolates of dengue virus with distinctive susceptibility to nitric oxide radical induce differential gene responses in THP-1 cells.	-
CD69	969	18455750	DENV2	THP1	Microarray	THP1 cells infected with NO-sensitive viruses (isolated from DF patients) vs uninfected cells	down	Clinical isolates of dengue virus with distinctive susceptibility to nitric oxide radical induce differential gene responses in THP-1 cells.	-
CD7	924	18444802	DF and DHF	Patient Blood	Microarray	patients with dengue fever (DHF) in acute phase vs convalescent phase	up	Differences in global gene expression in peripheral blood mononuclear cells indicate a significant role of the innate responses in progression of dengue fever but not dengue hemorrhagic fever.	-
CD70	970	15584975	DENV2	Human monocyte derived macrophages	Microarray	Dengue infected Human monocyte derived macrophages 24hr vs Dengue uninfected cells	down	Gene Expression in Human Macrophages Infected with Dengue Virus Serotype-2	-
CD74	972	18444802	DF and DHF	Patient Blood	Microarray	patients with dengue fever (DHF) in acute phase vs convalescent phase	up	Differences in global gene expression in peripheral blood mononuclear cells indicate a significant role of the innate responses in progression of dengue fever but not dengue hemorrhagic fever.	-
CD79A	973	18455750	DENV2	THP1	Microarray	THP1 cells infected with NO-resistance viruses (isolated from DHF patients) vs uninfected cells	up	Clinical isolates of dengue virus with distinctive susceptibility to nitric oxide radical induce differential gene responses in THP-1 cells.	-
CD79B	974	18455750	DENV2	THP1	Microarray	THP1 cells infected with NO-sensitive viruses (isolated from DF patients) vs uninfected cells	up	Clinical isolates of dengue virus with distinctive susceptibility to nitric oxide radical induce differential gene responses in THP-1 cells.	-
CD83	9308	18455750	DENV2	THP1	Microarray	THP1 cells infected with NO-resistance viruses (isolated from DHF patients) vs uninfected cells	up	Clinical isolates of dengue virus with distinctive susceptibility to nitric oxide radical induce differential gene responses in THP-1 cells.	-
CD86	942	18455750	DENV2	THP1	Microarray	THP1 cells infected with NO-resistance viruses (isolated from DHF patients) vs uninfected cells	up	Clinical isolates of dengue virus with distinctive susceptibility to nitric oxide radical induce differential gene responses in THP-1 cells.	-
CD8B	926	18444802	DF and DHF	Patient Blood	Microarray	patients with dengue fever (DHF) in acute phase vs convalescent phase	up	Differences in global gene expression in peripheral blood mononuclear cells indicate a significant role of the innate responses in progression of dengue fever but not dengue hemorrhagic fever.	-
CD9	928	18455750	DENV2	THP1	Microarray	THP1 cells infected with NO-resistance viruses (isolated from DHF patients) vs uninfected cells	up	Clinical isolates of dengue virus with distinctive susceptibility to nitric oxide radical induce differential gene responses in THP-1 cells.	-
CDC20	991	19382257	DENV1	p53-deficient H1299	Microarray	Dengue infected p53-deficient cell line H1299 vs uninfected cell line	up	Gene expression profiling by microarray analysis reveals an important role for caspase-1 in dengue virus-induced p53-mediated apoptosis.	-
CDC25A	993	19382257	DENV1	p53-deficient H1299	Microarray	Dengue infected p53-knockin cell line, H273 vs uninfected cell line	up	Gene expression profiling by microarray analysis reveals an important role for caspase-1 in dengue virus-induced p53-mediated apoptosis.	-
CDK1	983	19382257	DENV1	p53-deficient H1299	Microarray	Dengue infected p53-deficient cell line H1299 vs uninfected cell line	up	Gene expression profiling by microarray analysis reveals an important role for caspase-1 in dengue virus-induced p53-mediated apoptosis.	-
CFD	1675	18444802	DF and DHF	Patient Blood	Microarray	patients with dengue fever (DHF) in acute phase vs convalescent phase	up	Differences in global gene expression in peripheral blood mononuclear cells indicate a significant role of the innate responses in progression of dengue fever but not dengue hemorrhagic fever.	-
CHRNA3	1136	16112753	DENV2	ECV304	Microarray	Dengue infected ECV304 endothelial-like cells vs unifected cells	down	Microarray and real-time RT-PCR analyses of a novel set of differentially expressed human genes in ECV304 endothelial-like cells infected with dengue virus type 2.	-
CHST5	23563	16112753	DENV2	ECV304	Microarray	Dengue infected ECV304 endothelial-like cells vs unifected cells	down	Microarray and real-time RT-PCR analyses of a novel set of differentially expressed human genes in ECV304 endothelial-like cells infected with dengue virus type 2.	-
CIITA	4261	18455750	DENV2	THP1	Microarray	THP1 cells infected with NO-resistance viruses (isolated from DHF patients) vs uninfected cells	down	Clinical isolates of dengue virus with distinctive susceptibility to nitric oxide radical induce differential gene responses in THP-1 cells.	-
CITED2	10370	16112753	DENV2	ECV304	Microarray	Dengue infected ECV304 endothelial-like cells vs unifected cells	down	Microarray and real-time RT-PCR analyses of a novel set of differentially expressed human genes in ECV304 endothelial-like cells infected with dengue virus type 2.	-
CLCF1	23529	18444802	DF and DHF	Patient Blood	Microarray	patients with dengue fever (DHF) in acute phase vs convalescent phase	up	Differences in global gene expression in peripheral blood mononuclear cells indicate a significant role of the innate responses in progression of dengue fever but not dengue hemorrhagic fever.	-
CLEC4A	50856	18444802	DF and DHF	Patient Blood	Microarray	patients with dengue fever (DHF) in acute phase vs convalescent phase	up	Differences in global gene expression in peripheral blood mononuclear cells indicate a significant role of the innate responses in progression of dengue fever but not dengue hemorrhagic fever.	-
CLEC4E	26253	18444802	DF and DHF	Patient Blood	Microarray	patients with dengue fever (DF) in acute phase vs convalescent phase	up	Differences in global gene expression in peripheral blood mononuclear cells indicate a significant role of the innate responses in progression of dengue fever but not dengue hemorrhagic fever.	-
CLN3	1201	16112753	DENV2	ECV304	Microarray	Dengue infected ECV304 endothelial-like cells vs unifected cells	down	Microarray and real-time RT-PCR analyses of a novel set of differentially expressed human genes in ECV304 endothelial-like cells infected with dengue virus type 2.	-
CLU	1191	19382257	DENV1	p53-deficient H1299	Microarray	Dengue infected p53-deficient cell line H1299 vs uninfected cell line	up	Gene expression profiling by microarray analysis reveals an important role for caspase-1 in dengue virus-induced p53-mediated apoptosis.	-
CMTR1	23070	19382257	DENV1	p53-deficient H1299	Microarray	Dengue infected p53-knockin cell line, H273 vs uninfected cell line	up	Gene expression profiling by microarray analysis reveals an important role for caspase-1 in dengue virus-induced p53-mediated apoptosis.	-
CNP	1267	19382257	DENV1	p53-deficient H1299	Microarray	Dengue infected p53-knockin cell line, H273 vs uninfected cell line	up	Gene expression profiling by microarray analysis reveals an important role for caspase-1 in dengue virus-induced p53-mediated apoptosis.	-
COA4	51287	16112753	DENV2	ECV304	Microarray	Dengue infected ECV304 endothelial-like cells vs unifected cells	down	Microarray and real-time RT-PCR analyses of a novel set of differentially expressed human genes in ECV304 endothelial-like cells infected with dengue virus type 2.	-
COLEC10	10584	16112753	DENV2	ECV304	Microarray	Dengue infected ECV304 endothelial-like cells vs unifected cells	down	Microarray and real-time RT-PCR analyses of a novel set of differentially expressed human genes in ECV304 endothelial-like cells infected with dengue virus type 2.	-
COMMD2	51122	16112753	DENV2	ECV304	Microarray	Dengue infected ECV304 endothelial-like cells vs unifected cells	down	Microarray and real-time RT-PCR analyses of a novel set of differentially expressed human genes in ECV304 endothelial-like cells infected with dengue virus type 2.	-
CPM	1368	16112753	DENV2	ECV304	Microarray	Dengue infected ECV304 endothelial-like cells vs unifected cells	down	Microarray and real-time RT-PCR analyses of a novel set of differentially expressed human genes in ECV304 endothelial-like cells infected with dengue virus type 2.	-
CR2	1380	18455750	DENV2	THP1	Microarray	THP1 cells infected with NO-resistance viruses (isolated from DHF patients) vs uninfected cells	down	Clinical isolates of dengue virus with distinctive susceptibility to nitric oxide radical induce differential gene responses in THP-1 cells.	-
CRYL1	51084	16112753	DENV2	ECV304	Microarray	Dengue infected ECV304 endothelial-like cells vs unifected cells	down	Microarray and real-time RT-PCR analyses of a novel set of differentially expressed human genes in ECV304 endothelial-like cells infected with dengue virus type 2.	-
CSF1R	1436	15584975	DENV2	Human monocyte derived macrophages	Microarray	Dengue infected Human monocyte derived macrophages 6hr vs Dengue uninfected cells	up	Gene Expression in Human Macrophages Infected with Dengue Virus Serotype-2	-
CSF1R	1436	18455750	DENV2	THP1	Microarray	THP1 cells infected with NO-resistance viruses (isolated from DHF patients) vs uninfected cells	up	Clinical isolates of dengue virus with distinctive susceptibility to nitric oxide radical induce differential gene responses in THP-1 cells.	-
CSF3R	1441	18455750	DENV2	THP1	Microarray	THP1 cells infected with NO-sensitive viruses (isolated from DF patients) vs uninfected cells	up	Clinical isolates of dengue virus with distinctive susceptibility to nitric oxide radical induce differential gene responses in THP-1 cells.	-
CSNK1A1	1452	16112753	DENV2	ECV304	Microarray	Dengue infected ECV304 endothelial-like cells vs unifected cells	down	Microarray and real-time RT-PCR analyses of a novel set of differentially expressed human genes in ECV304 endothelial-like cells infected with dengue virus type 2.	-
CTLA4	1493	18455750	DENV2	THP1	Microarray	THP1 cells infected with NO-resistance viruses (isolated from DHF patients) vs uninfected cells	up	Clinical isolates of dengue virus with distinctive susceptibility to nitric oxide radical induce differential gene responses in THP-1 cells.	-
CTSL	1514	18444802	DF and DHF	Patient Blood	Microarray	patients with dengue fever (DF) in acute phase vs convalescent phase	up	Differences in global gene expression in peripheral blood mononuclear cells indicate a significant role of the innate responses in progression of dengue fever but not dengue hemorrhagic fever.	-
CTSS	1520	18444802	DF and DHF	Patient Blood	Microarray	patients with dengue fever (DHF) in acute phase vs convalescent phase	up	Differences in global gene expression in peripheral blood mononuclear cells indicate a significant role of the innate responses in progression of dengue fever but not dengue hemorrhagic fever.	-
CXCL1	2919	15584975	DENV2	Human monocyte derived macrophages	Microarray	Dengue infected Human monocyte derived macrophages 24hr vs Dengue uninfected cells	up	Gene Expression in Human Macrophages Infected with Dengue Virus Serotype-2	-
CXCL1	2919	15584975	DENV2	Human monocyte derived macrophages	Microarray	Dengue infected Human monocyte derived macrophages 6hr vs Dengue uninfected cells	up	Gene Expression in Human Macrophages Infected with Dengue Virus Serotype-2	-
CXCL10	3627	19551822	DENV2	Human primary B cells	Microarray, qRT-PCR	Dengue infected Human primary B cells	up	Gene expression profiling of dengue infected human primary cells identifies secreted mediators in vivo.	-
CXCL10	3627	19551822	DENV2	Human primary dendritic cells	Microarray, qRT-PCR	Dengue infected Human primary dendritic cells	up	Gene expression profiling of dengue infected human primary cells identifies secreted mediators in vivo.	-
CXCL10	3627	19551822	DENV2	Human primary monocytes	Microarray, qRT-PCR	Dengue infected Human primary monocytes	up	Gene expression profiling of dengue infected human primary cells identifies secreted mediators in vivo.	-
CXCL10	3627	19382257	DENV1	p53-deficient H1299	Microarray	Dengue infected p53-knockin cell line, H273 vs uninfected cell line	up	Gene expression profiling by microarray analysis reveals an important role for caspase-1 in dengue virus-induced p53-mediated apoptosis.	-
CXCL10	3627	18444802	DF and DHF	Patient Blood	Microarray	patients with dengue fever (DF) in acute phase vs convalescent phase	up	Differences in global gene expression in peripheral blood mononuclear cells indicate a significant role of the innate responses in progression of dengue fever but not dengue hemorrhagic fever.	-
CXCL2	2920	15584975	DENV2	Human monocyte derived macrophages	Microarray	Dengue infected Human monocyte derived macrophages 24hr vs Dengue uninfected cells	up	Gene Expression in Human Macrophages Infected with Dengue Virus Serotype-2	-
CXCL2	2920	15584975	DENV2	Human monocyte derived macrophages	Microarray	Dengue infected Human monocyte derived macrophages 6hr vs Dengue uninfected cells	up	Gene Expression in Human Macrophages Infected with Dengue Virus Serotype-2	-
CXCL2	2920	19382257	DENV1	p53-deficient H1299	Microarray	Dengue infected p53-knockin cell line, H273 vs uninfected cell line	up	Gene expression profiling by microarray analysis reveals an important role for caspase-1 in dengue virus-induced p53-mediated apoptosis.	-
CXCL3	2921	15584975	DENV2	Human monocyte derived macrophages	Microarray	Dengue infected Human monocyte derived macrophages 24hr vs Dengue uninfected cells	up	Gene Expression in Human Macrophages Infected with Dengue Virus Serotype-2	-
CXCL3	2921	15584975	DENV2	Human monocyte derived macrophages	Microarray	Dengue infected Human monocyte derived macrophages 6hr vs Dengue uninfected cells	up	Gene Expression in Human Macrophages Infected with Dengue Virus Serotype-2	-
CXCL5	6374	15584975	DENV2	Human monocyte derived macrophages	Microarray	Dengue infected Human monocyte derived macrophages 24hr vs Dengue uninfected cells	down	Gene Expression in Human Macrophages Infected with Dengue Virus Serotype-2	-
CXCL8	3576	19837110	DENV2	HepG2 cells	Microarray, Real time PCR	Dengue infected HepG2 cells vs uninfected cells	up	Gene expression analysis during dengue virus infection in HepG2 cells reveals virus control of innate immune response.	-
CXCL8	3576	15584975	DENV2	Human monocyte derived macrophages	Microarray	Dengue infected Human monocyte derived macrophages 6hr vs Dengue uninfected cells	up	Gene Expression in Human Macrophages Infected with Dengue Virus Serotype-2	-
CXCL8	3576	18455750	DENV2	THP1	Microarray	THP1 cells infected with NO-resistance viruses (isolated from DHF patients) vs uninfected cells	up	Clinical isolates of dengue virus with distinctive susceptibility to nitric oxide radical induce differential gene responses in THP-1 cells.	-
CYP2C8	1558	16112753	DENV2	ECV304	Microarray	Dengue infected ECV304 endothelial-like cells vs unifected cells	down	Microarray and real-time RT-PCR analyses of a novel set of differentially expressed human genes in ECV304 endothelial-like cells infected with dengue virus type 2.	-
CYP2J2	1573	19382257	DENV1	p53-deficient H1299	Microarray	Dengue infected p53-knockin cell line, H273 vs uninfected cell line	up	Gene expression profiling by microarray analysis reveals an important role for caspase-1 in dengue virus-induced p53-mediated apoptosis.	-
DACT1	51339	19382257	DENV1	p53-deficient H1299	Microarray	Dengue infected p53-deficient cell line H1299 vs uninfected cell line	up	Gene expression profiling by microarray analysis reveals an important role for caspase-1 in dengue virus-induced p53-mediated apoptosis.	-
DDX41	51428	16112753	DENV2	ECV304	Microarray	Dengue infected ECV304 endothelial-like cells vs unifected cells	down	Microarray and real-time RT-PCR analyses of a novel set of differentially expressed human genes in ECV304 endothelial-like cells infected with dengue virus type 2.	-
DDX58	23586	19837110	DENV2	HepG2 cells	Microarray, Real time PCR	Dengue infected HepG2 cells vs uninfected cells	up	Gene expression analysis during dengue virus infection in HepG2 cells reveals virus control of innate immune response.	-
DDX58	23586	19382257	DENV1	p53-deficient H1299	Microarray	Dengue infected p53-deficient cell line H1299 vs uninfected cell line	up	Gene expression profiling by microarray analysis reveals an important role for caspase-1 in dengue virus-induced p53-mediated apoptosis.	-
DDX58	23586	19382257	DENV1	p53-deficient H1299	Microarray	Dengue infected p53-knockin cell line, H273 vs uninfected cell line	up	Gene expression profiling by microarray analysis reveals an important role for caspase-1 in dengue virus-induced p53-mediated apoptosis.	-
DDX60	55601	19382257	DENV1	p53-deficient H1299	Microarray	Dengue infected p53-knockin cell line, H273 vs uninfected cell line	up	Gene expression profiling by microarray analysis reveals an important role for caspase-1 in dengue virus-induced p53-mediated apoptosis.	-
DPP4	1803	18444802	DF and DHF	Patient Blood	Microarray	patients with dengue fever (DHF) in acute phase vs convalescent phase	up	Differences in global gene expression in peripheral blood mononuclear cells indicate a significant role of the innate responses in progression of dengue fever but not dengue hemorrhagic fever.	-
DSP	1832	19382257	DENV1	p53-deficient H1299	Microarray	Dengue infected p53-deficient cell line H1299 vs uninfected cell line	up	Gene expression profiling by microarray analysis reveals an important role for caspase-1 in dengue virus-induced p53-mediated apoptosis.	-
EFNB2	1948	16112753	DENV2	ECV304	Microarray	Dengue infected ECV304 endothelial-like cells vs unifected cells	up	Microarray and real-time RT-PCR analyses of a novel set of differentially expressed human genes in ECV304 endothelial-like cells infected with dengue virus type 2.	-
EIF1AX	1964	19855901	DENV2	HepG2 cells	Microarray, qPCR	Dengue infected HepG2 cells 24hr vs 0hr	up	Dengue virus-induced regulation of the host cell translational machinery.	-
EIF2AK2	5610	19382257	DENV1	p53-deficient H1299	Microarray	Dengue infected p53-deficient cell line H1299 vs uninfected cell line	up	Gene expression profiling by microarray analysis reveals an important role for caspase-1 in dengue virus-induced p53-mediated apoptosis.	-
EIF2AK2	5610	19382257	DENV1	p53-deficient H1299	Microarray	Dengue infected p53-knockin cell line, H273 vs uninfected cell line	up	Gene expression profiling by microarray analysis reveals an important role for caspase-1 in dengue virus-induced p53-mediated apoptosis.	-
EIF2B1	1967	19855901	DENV2	HepG2 cells	Microarray, qPCR	Dengue infected HepG2 cells 48hr vs 0hr	down	Dengue virus-induced regulation of the host cell translational machinery.	-
EIF2S2	8894	16112753	DENV2	ECV304	Microarray	Dengue infected ECV304 endothelial-like cells vs unifected cells	up	Microarray and real-time RT-PCR analyses of a novel set of differentially expressed human genes in ECV304 endothelial-like cells infected with dengue virus type 2.	-
EIF3H	8667	19855901	DENV2	HepG2 cells	Microarray, qPCR	Dengue infected HepG2 cells 48hr vs 0hr	down	Dengue virus-induced regulation of the host cell translational machinery.	-
EIF3I	8668	19855901	DENV2	HepG2 cells	Microarray, qPCR	Dengue infected HepG2 cells 6hr vs 0hr	up	Dengue virus-induced regulation of the host cell translational machinery.	-
EIF3K	27335	19855901	DENV2	HepG2 cells	Microarray, qPCR	Dengue infected HepG2 cells 24hr vs 0hr	up	Dengue virus-induced regulation of the host cell translational machinery.	-
EIF4A1	1973	19855901	DENV2	HepG2 cells	Microarray, qPCR	Dengue infected HepG2 cells 6hr vs 0hr	up	Dengue virus-induced regulation of the host cell translational machinery.	-
EIF4B	1975	19855901	DENV2	HepG2 cells	Microarray, qPCR	Dengue infected HepG2 cells 6hr vs 0hr	up	Dengue virus-induced regulation of the host cell translational machinery.	-
EIF4E	1977	19855901	DENV2	HepG2 cells	Microarray, qPCR	Dengue infected HepG2 cells 6hr vs 0hr	up	Dengue virus-induced regulation of the host cell translational machinery.	-
EIF4EBP1	1978	19855901	DENV2	HepG2 cells	Microarray, qPCR	Dengue infected HepG2 cells 24hr vs 0hr	down	Dengue virus-induced regulation of the host cell translational machinery.	-
EIF4EBP2	1979	19855901	DENV2	HepG2 cells	Microarray, qPCR	Dengue infected HepG2 cells 6hr vs 0hr	down	Dengue virus-induced regulation of the host cell translational machinery.	-
EIF4EBP3	8637	19855901	DENV2	HepG2 cells	Microarray, qPCR	Dengue infected HepG2 cells 6hr vs 0hr	down	Dengue virus-induced regulation of the host cell translational machinery.	-
EIF4G1	1981	19855901	DENV2	HepG2 cells	Microarray, qPCR	Dengue infected HepG2 cells 6hr vs 0hr	down	Dengue virus-induced regulation of the host cell translational machinery.	-
EIF4G3	8672	19855901	DENV2	HepG2 cells	Microarray, qPCR	Dengue infected HepG2 cells 6hr vs 0hr	up	Dengue virus-induced regulation of the host cell translational machinery.	-
EIF5B	9669	19855901	DENV2	HepG2 cells	Microarray, qPCR	Dengue infected HepG2 cells 48hr vs 0hr	down	Dengue virus-induced regulation of the host cell translational machinery.	-
ELF1	1997	19382257	DENV1	p53-deficient H1299	Microarray	Dengue infected p53-deficient cell line H1299 vs uninfected cell line	up	Gene expression profiling by microarray analysis reveals an important role for caspase-1 in dengue virus-induced p53-mediated apoptosis.	-
ENTPD3	956	16112753	DENV2	ECV304	Microarray	Dengue infected ECV304 endothelial-like cells vs unifected cells	down	Microarray and real-time RT-PCR analyses of a novel set of differentially expressed human genes in ECV304 endothelial-like cells infected with dengue virus type 2.	-
EPHA2	1969	15584975	DENV2	Human monocyte derived macrophages	Microarray	Dengue infected Human monocyte derived macrophages 6hr vs Dengue uninfected cells	down	Gene Expression in Human Macrophages Infected with Dengue Virus Serotype-2	-
EPHA7	2045	15584975	DENV2	Human monocyte derived macrophages	Microarray	Dengue infected Human monocyte derived macrophages 6hr vs Dengue uninfected cells	up	Gene Expression in Human Macrophages Infected with Dengue Virus Serotype-2	-
EPX	8288	18455750	DENV2	THP1	Microarray	THP1 cells infected with NO-sensitive viruses (isolated from DF patients) vs uninfected cells	up	Clinical isolates of dengue virus with distinctive susceptibility to nitric oxide radical induce differential gene responses in THP-1 cells.	-
ETV6	2120	19382257	DENV1	p53-deficient H1299	Microarray	Dengue infected p53-knockin cell line, H273 vs uninfected cell line	up	Gene expression profiling by microarray analysis reveals an important role for caspase-1 in dengue virus-induced p53-mediated apoptosis.	-
FAM46A	55603	19382257	DENV1	p53-deficient H1299	Microarray	Dengue infected p53-knockin cell line, H273 vs uninfected cell line	up	Gene expression profiling by microarray analysis reveals an important role for caspase-1 in dengue virus-induced p53-mediated apoptosis.	-
FAM50A	9130	16112753	DENV2	ECV304	Microarray	Dengue infected ECV304 endothelial-like cells vs unifected cells	up	Microarray and real-time RT-PCR analyses of a novel set of differentially expressed human genes in ECV304 endothelial-like cells infected with dengue virus type 2.	-
FASLG	356	16112753	DENV2	ECV304	Microarray	Dengue infected ECV304 endothelial-like cells vs unifected cells	down	Microarray and real-time RT-PCR analyses of a novel set of differentially expressed human genes in ECV304 endothelial-like cells infected with dengue virus type 2.	-
FCAR	2204	18455750	DENV2	THP1	Microarray	THP1 cells infected with NO-resistance viruses (isolated from DHF patients) vs uninfected cells	up	Clinical isolates of dengue virus with distinctive susceptibility to nitric oxide radical induce differential gene responses in THP-1 cells.	-
FCER2	2208	18444802	DF and DHF	Patient Blood	Microarray	patients with dengue fever (DHF) in acute phase vs convalescent phase	up	Differences in global gene expression in peripheral blood mononuclear cells indicate a significant role of the innate responses in progression of dengue fever but not dengue hemorrhagic fever.	-
FCGR1A	2209	18444802	DF and DHF	Patient Blood	Microarray	patients with dengue fever (DF) in acute phase vs convalescent phase	up	Differences in global gene expression in peripheral blood mononuclear cells indicate a significant role of the innate responses in progression of dengue fever but not dengue hemorrhagic fever.	-
FGF1	2246	15584975	DENV2	Human monocyte derived macrophages	Microarray	Dengue infected Human monocyte derived macrophages 24hr vs Dengue uninfected cells	down	Gene Expression in Human Macrophages Infected with Dengue Virus Serotype-2	-
FKBP1A	2280	16112753	DENV2	ECV304	Microarray	Dengue infected ECV304 endothelial-like cells vs unifected cells	down	Microarray and real-time RT-PCR analyses of a novel set of differentially expressed human genes in ECV304 endothelial-like cells infected with dengue virus type 2.	-
FMO3	2328	16112753	DENV2	ECV304	Microarray	Dengue infected ECV304 endothelial-like cells vs unifected cells	down	Microarray and real-time RT-PCR analyses of a novel set of differentially expressed human genes in ECV304 endothelial-like cells infected with dengue virus type 2.	-
FOLR1	2348	19382257	DENV1	p53-deficient H1299	Microarray	Dengue infected p53-deficient cell line H1299 vs uninfected cell line	up	Gene expression profiling by microarray analysis reveals an important role for caspase-1 in dengue virus-induced p53-mediated apoptosis.	-
FTH1P16	2508	18444802	DF and DHF	Patient Blood	Microarray	patients with dengue fever (DHF) in acute phase vs convalescent phase	up	Differences in global gene expression in peripheral blood mononuclear cells indicate a significant role of the innate responses in progression of dengue fever but not dengue hemorrhagic fever.	-
GADD45B	4616	19382257	DENV1	p53-deficient H1299	Microarray	Dengue infected p53-deficient cell line H1299 vs uninfected cell line	up	Gene expression profiling by microarray analysis reveals an important role for caspase-1 in dengue virus-induced p53-mediated apoptosis.	-
GBP1	2633	19382257	DENV1	p53-deficient H1299	Microarray	Dengue infected p53-deficient cell line H1299 vs uninfected cell line	up	Gene expression profiling by microarray analysis reveals an important role for caspase-1 in dengue virus-induced p53-mediated apoptosis.	-
GBP1	2633	19382257	DENV1	p53-deficient H1299	Microarray	Dengue infected p53-knockin cell line, H273 vs uninfected cell line	up	Gene expression profiling by microarray analysis reveals an important role for caspase-1 in dengue virus-induced p53-mediated apoptosis.	-
GBP1	2633	18444802	DF and DHF	Patient Blood	Microarray	patients with dengue fever (DF) in acute phase vs convalescent phase	up	Differences in global gene expression in peripheral blood mononuclear cells indicate a significant role of the innate responses in progression of dengue fever but not dengue hemorrhagic fever.	-
GDF15	9518	15584975	DENV2	Human monocyte derived macrophages	Microarray	Dengue infected Human monocyte derived macrophages 24hr vs Dengue uninfected cells	down	Gene Expression in Human Macrophages Infected with Dengue Virus Serotype-2	-
GLRA1	2741	16112753	DENV2	ECV304	Microarray	Dengue infected ECV304 endothelial-like cells vs unifected cells	down	Microarray and real-time RT-PCR analyses of a novel set of differentially expressed human genes in ECV304 endothelial-like cells infected with dengue virus type 2.	-
GMFG	9535	16112753	DENV2	ECV304	Microarray	Dengue infected ECV304 endothelial-like cells vs unifected cells	up	Microarray and real-time RT-PCR analyses of a novel set of differentially expressed human genes in ECV304 endothelial-like cells infected with dengue virus type 2.	-
GNLY	10578	18444802	DF and DHF	Patient Blood	Microarray	patients with dengue fever (DHF) in acute phase vs convalescent phase	up	Differences in global gene expression in peripheral blood mononuclear cells indicate a significant role of the innate responses in progression of dengue fever but not dengue hemorrhagic fever.	-
GNRHR	2798	16112753	DENV2	ECV304	Microarray	Dengue infected ECV304 endothelial-like cells vs unifected cells	down	Microarray and real-time RT-PCR analyses of a novel set of differentially expressed human genes in ECV304 endothelial-like cells infected with dengue virus type 2.	-
GPR171	29909	16112753	DENV2	ECV304	Microarray	Dengue infected ECV304 endothelial-like cells vs unifected cells	down	Microarray and real-time RT-PCR analyses of a novel set of differentially expressed human genes in ECV304 endothelial-like cells infected with dengue virus type 2.	-
GRN	2896	18455750	DENV2	THP1	Microarray	THP1 cells infected with NO-resistance viruses (isolated from DHF patients) vs uninfected cells	down	Clinical isolates of dengue virus with distinctive susceptibility to nitric oxide radical induce differential gene responses in THP-1 cells.	-
GZMK	3003	18455750	DENV2	THP1	Microarray	THP1 cells infected with NO-sensitive viruses (isolated from DF patients) vs uninfected cells	up	Clinical isolates of dengue virus with distinctive susceptibility to nitric oxide radical induce differential gene responses in THP-1 cells.	-
HBD	3045	16112753	DENV2	ECV304	Microarray	Dengue infected ECV304 endothelial-like cells vs unifected cells	down	Microarray and real-time RT-PCR analyses of a novel set of differentially expressed human genes in ECV304 endothelial-like cells infected with dengue virus type 2.	-
HCLS1	3059	18455750	DENV2	THP1	Microarray	THP1 cells infected with NO-resistance viruses (isolated from DHF patients) vs uninfected cells	up	Clinical isolates of dengue virus with distinctive susceptibility to nitric oxide radical induce differential gene responses in THP-1 cells.	-
HERC5	51191	19382257	DENV1	p53-deficient H1299	Microarray	Dengue infected p53-deficient cell line H1299 vs uninfected cell line	up	Gene expression profiling by microarray analysis reveals an important role for caspase-1 in dengue virus-induced p53-mediated apoptosis.	-
HERC5	51191	19382257	DENV1	p53-deficient H1299	Microarray	Dengue infected p53-knockin cell line, H273 vs uninfected cell line	up	Gene expression profiling by microarray analysis reveals an important role for caspase-1 in dengue virus-induced p53-mediated apoptosis.	-
HERC6	55008	19382257	DENV1	p53-deficient H1299	Microarray	Dengue infected p53-knockin cell line, H273 vs uninfected cell line	up	Gene expression profiling by microarray analysis reveals an important role for caspase-1 in dengue virus-induced p53-mediated apoptosis.	-
HIST1H2AD	3013	19382257	DENV1	p53-deficient H1299	Microarray	Dengue infected p53-knockin cell line, H273 vs uninfected cell line	up	Gene expression profiling by microarray analysis reveals an important role for caspase-1 in dengue virus-induced p53-mediated apoptosis.	-
HLA-B	3106	19382257	DENV1	p53-deficient H1299	Microarray	Dengue infected p53-deficient cell line H1299 vs uninfected cell line	up	Gene expression profiling by microarray analysis reveals an important role for caspase-1 in dengue virus-induced p53-mediated apoptosis.	-
HLA-B	3106	19382257	DENV1	p53-deficient H1299	Microarray	Dengue infected p53-knockin cell line, H273 vs uninfected cell line	up	Gene expression profiling by microarray analysis reveals an important role for caspase-1 in dengue virus-induced p53-mediated apoptosis.	-
HLA-B	3106	18455750	DENV2	THP1	Microarray	THP1 cells infected with NO-resistance viruses (isolated from DHF patients) vs uninfected cells	down	Clinical isolates of dengue virus with distinctive susceptibility to nitric oxide radical induce differential gene responses in THP-1 cells.	-
HLA-C	3107	19382257	DENV1	p53-deficient H1299	Microarray	Dengue infected p53-knockin cell line, H273 vs uninfected cell line	up	Gene expression profiling by microarray analysis reveals an important role for caspase-1 in dengue virus-induced p53-mediated apoptosis.	-
HLA-C	3107	19382257	DENV1	p53-deficient H1299	Microarray	Dengue infected p53-deficient cell line H1299 vs uninfected cell line	up	Gene expression profiling by microarray analysis reveals an important role for caspase-1 in dengue virus-induced p53-mediated apoptosis.	-
HLA-C	3107	18455750	DENV2	THP1	Microarray	THP1 cells infected with NO-sensitive viruses (isolated from DF patients) vs uninfected cells	up	Clinical isolates of dengue virus with distinctive susceptibility to nitric oxide radical induce differential gene responses in THP-1 cells.	-
HLA-DPA1	3113	18444802	DF and DHF	Patient Blood	Microarray	patients with dengue fever (DHF) in acute phase vs convalescent phase	up	Differences in global gene expression in peripheral blood mononuclear cells indicate a significant role of the innate responses in progression of dengue fever but not dengue hemorrhagic fever.	-
HLA-DPB1	3115	18444802	DF and DHF	Patient Blood	Microarray	patients with dengue fever (DHF) in acute phase vs convalescent phase	up	Differences in global gene expression in peripheral blood mononuclear cells indicate a significant role of the innate responses in progression of dengue fever but not dengue hemorrhagic fever.	-
HLA-E	3133	19382257	DENV1	p53-deficient H1299	Microarray	Dengue infected p53-knockin cell line, H273 vs uninfected cell line	up	Gene expression profiling by microarray analysis reveals an important role for caspase-1 in dengue virus-induced p53-mediated apoptosis.	-
HLA-E	3133	19382257	DENV1	p53-deficient H1299	Microarray	Dengue infected p53-deficient cell line H1299 vs uninfected cell line	up	Gene expression profiling by microarray analysis reveals an important role for caspase-1 in dengue virus-induced p53-mediated apoptosis.	-
HLA-G	3135	19382257	DENV1	p53-deficient H1299	Microarray	Dengue infected p53-knockin cell line, H273 vs uninfected cell line	up	Gene expression profiling by microarray analysis reveals an important role for caspase-1 in dengue virus-induced p53-mediated apoptosis.	-
HMGN2	3151	16112753	DENV2	ECV304	Microarray	Dengue infected ECV304 endothelial-like cells vs unifected cells	down	Microarray and real-time RT-PCR analyses of a novel set of differentially expressed human genes in ECV304 endothelial-like cells infected with dengue virus type 2.	-
HMMR	3161	19382257	DENV1	p53-deficient H1299	Microarray	Dengue infected p53-deficient cell line H1299 vs uninfected cell line	up	Gene expression profiling by microarray analysis reveals an important role for caspase-1 in dengue virus-induced p53-mediated apoptosis.	-
HNF4G	3174	16112753	DENV2	ECV304	Microarray	Dengue infected ECV304 endothelial-like cells vs unifected cells	up	Microarray and real-time RT-PCR analyses of a novel set of differentially expressed human genes in ECV304 endothelial-like cells infected with dengue virus type 2.	-
HOMER3	9454	16112753	DENV2	ECV304	Microarray	Dengue infected ECV304 endothelial-like cells vs unifected cells	up	Microarray and real-time RT-PCR analyses of a novel set of differentially expressed human genes in ECV304 endothelial-like cells infected with dengue virus type 2.	-
HOXB7	3217	16112753	DENV2	ECV304	Microarray	Dengue infected ECV304 endothelial-like cells vs unifected cells	down	Microarray and real-time RT-PCR analyses of a novel set of differentially expressed human genes in ECV304 endothelial-like cells infected with dengue virus type 2.	-
HSPB1	3315	16112753	DENV2	ECV304	Microarray	Dengue infected ECV304 endothelial-like cells vs unifected cells	up	Microarray and real-time RT-PCR analyses of a novel set of differentially expressed human genes in ECV304 endothelial-like cells infected with dengue virus type 2.	-
HTR1F	3355	16112753	DENV2	ECV304	Microarray	Dengue infected ECV304 endothelial-like cells vs unifected cells	down	Microarray and real-time RT-PCR analyses of a novel set of differentially expressed human genes in ECV304 endothelial-like cells infected with dengue virus type 2.	-
ICOSLG	23308	18444802	DF and DHF	Patient Blood	Microarray	patients with dengue fever (DHF) in acute phase vs convalescent phase	up	Differences in global gene expression in peripheral blood mononuclear cells indicate a significant role of the innate responses in progression of dengue fever but not dengue hemorrhagic fever.	-
IFI16	3428	19382257	DENV1	p53-deficient H1299	Microarray	Dengue infected p53-deficient cell line H1299 vs uninfected cell line	up	Gene expression profiling by microarray analysis reveals an important role for caspase-1 in dengue virus-induced p53-mediated apoptosis.	-
IFI16	3428	19382257	DENV1	p53-deficient H1299	Microarray	Dengue infected p53-knockin cell line, H273 vs uninfected cell line	up	Gene expression profiling by microarray analysis reveals an important role for caspase-1 in dengue virus-induced p53-mediated apoptosis.	-
IFI27	3429	19382257	DENV1	p53-deficient H1299	Microarray	Dengue infected p53-deficient cell line H1299 vs uninfected cell line	up	Gene expression profiling by microarray analysis reveals an important role for caspase-1 in dengue virus-induced p53-mediated apoptosis.	-
IFI27	3429	19382257	DENV1	p53-deficient H1299	Microarray	Dengue infected p53-knockin cell line, H273 vs uninfected cell line	up	Gene expression profiling by microarray analysis reveals an important role for caspase-1 in dengue virus-induced p53-mediated apoptosis.	-
IFI27	3429	18444802	DF and DHF	Patient Blood	Microarray	patients with dengue fever (DF) in acute phase vs convalescent phase	up	Differences in global gene expression in peripheral blood mononuclear cells indicate a significant role of the innate responses in progression of dengue fever but not dengue hemorrhagic fever.	-
IFI35	3430	19382257	DENV1	p53-deficient H1299	Microarray	Dengue infected p53-deficient cell line H1299 vs uninfected cell line	up	Gene expression profiling by microarray analysis reveals an important role for caspase-1 in dengue virus-induced p53-mediated apoptosis.	-
IFI35	3430	19382257	DENV1	p53-deficient H1299	Microarray	Dengue infected p53-knockin cell line, H273 vs uninfected cell line	up	Gene expression profiling by microarray analysis reveals an important role for caspase-1 in dengue virus-induced p53-mediated apoptosis.	-
IFI44	10561	19382257	DENV1	p53-deficient H1299	Microarray	Dengue infected p53-deficient cell line H1299 vs uninfected cell line	up	Gene expression profiling by microarray analysis reveals an important role for caspase-1 in dengue virus-induced p53-mediated apoptosis.	-
IFI44	10561	19382257	DENV1	p53-deficient H1299	Microarray	Dengue infected p53-knockin cell line, H273 vs uninfected cell line	up	Gene expression profiling by microarray analysis reveals an important role for caspase-1 in dengue virus-induced p53-mediated apoptosis.	-
IFI44	10561	18444802	DF and DHF	Patient Blood	Microarray	patients with dengue fever (DF) in acute phase vs convalescent phase	up	Differences in global gene expression in peripheral blood mononuclear cells indicate a significant role of the innate responses in progression of dengue fever but not dengue hemorrhagic fever.	-
IFI44L	10964	19382257	DENV1	p53-deficient H1299	Microarray	Dengue infected p53-deficient cell line H1299 vs uninfected cell line	up	Gene expression profiling by microarray analysis reveals an important role for caspase-1 in dengue virus-induced p53-mediated apoptosis.	-
IFI44L	10964	19382257	DENV1	p53-deficient H1299	Microarray	Dengue infected p53-knockin cell line, H273 vs uninfected cell line	up	Gene expression profiling by microarray analysis reveals an important role for caspase-1 in dengue virus-induced p53-mediated apoptosis.	-
IFI6	2537	19382257	DENV1	p53-deficient H1299	Microarray	Dengue infected p53-deficient cell line H1299 vs uninfected cell line	up	Gene expression profiling by microarray analysis reveals an important role for caspase-1 in dengue virus-induced p53-mediated apoptosis.	-
IFI6	2537	19382257	DENV1	p53-deficient H1299	Microarray	Dengue infected p53-knockin cell line, H273 vs uninfected cell line	up	Gene expression profiling by microarray analysis reveals an important role for caspase-1 in dengue virus-induced p53-mediated apoptosis.	-
IFIH1	64135	19837110	DENV2	HepG2 cells	Microarray, Real time PCR	Dengue infected HepG2 cells vs uninfected cells	up	Gene expression analysis during dengue virus infection in HepG2 cells reveals virus control of innate immune response.	-
IFIH1	64135	19382257	DENV1	p53-deficient H1299	Microarray	Dengue infected p53-deficient cell line H1299 vs uninfected cell line	up	Gene expression profiling by microarray analysis reveals an important role for caspase-1 in dengue virus-induced p53-mediated apoptosis.	-
IFIH1	64135	19382257	DENV1	p53-deficient H1299	Microarray	Dengue infected p53-knockin cell line, H273 vs uninfected cell line	up	Gene expression profiling by microarray analysis reveals an important role for caspase-1 in dengue virus-induced p53-mediated apoptosis.	-
IFIH1	64135	18444802	DF and DHF	Patient Blood	Microarray	patients with dengue fever (DF) in acute phase vs convalescent phase	up	Differences in global gene expression in peripheral blood mononuclear cells indicate a significant role of the innate responses in progression of dengue fever but not dengue hemorrhagic fever.	-
IFIT1	3434	19382257	DENV1	p53-deficient H1299	Microarray	Dengue infected p53-deficient cell line H1299 vs uninfected cell line	up	Gene expression profiling by microarray analysis reveals an important role for caspase-1 in dengue virus-induced p53-mediated apoptosis.	-
IFIT1	3434	19382257	DENV1	p53-deficient H1299	Microarray	Dengue infected p53-knockin cell line, H273 vs uninfected cell line	up	Gene expression profiling by microarray analysis reveals an important role for caspase-1 in dengue virus-induced p53-mediated apoptosis.	-
IFIT1	3434	18444802	DF and DHF	Patient Blood	Microarray	patients with dengue fever (DF) in acute phase vs convalescent phase	up	Differences in global gene expression in peripheral blood mononuclear cells indicate a significant role of the innate responses in progression of dengue fever but not dengue hemorrhagic fever.	-
IFIT3	3437	19382257	DENV1	p53-deficient H1299	Microarray	Dengue infected p53-deficient cell line H1299 vs uninfected cell line	up	Gene expression profiling by microarray analysis reveals an important role for caspase-1 in dengue virus-induced p53-mediated apoptosis.	-
IFIT3	3437	19382257	DENV1	p53-deficient H1299	Microarray	Dengue infected p53-knockin cell line, H273 vs uninfected cell line	up	Gene expression profiling by microarray analysis reveals an important role for caspase-1 in dengue virus-induced p53-mediated apoptosis.	-
IFIT5	24138	19382257	DENV1	p53-deficient H1299	Microarray	Dengue infected p53-deficient cell line H1299 vs uninfected cell line	up	Gene expression profiling by microarray analysis reveals an important role for caspase-1 in dengue virus-induced p53-mediated apoptosis.	-
IFIT5	24138	19382257	DENV1	p53-deficient H1299	Microarray	Dengue infected p53-knockin cell line, H273 vs uninfected cell line	up	Gene expression profiling by microarray analysis reveals an important role for caspase-1 in dengue virus-induced p53-mediated apoptosis.	-
IFITM1	8519	19382257	DENV1	p53-deficient H1299	Microarray	Dengue infected p53-deficient cell line H1299 vs uninfected cell line	up	Gene expression profiling by microarray analysis reveals an important role for caspase-1 in dengue virus-induced p53-mediated apoptosis.	-
IFITM1	8519	19382257	DENV1	p53-deficient H1299	Microarray	Dengue infected p53-knockin cell line, H273 vs uninfected cell line	up	Gene expression profiling by microarray analysis reveals an important role for caspase-1 in dengue virus-induced p53-mediated apoptosis.	-
IFITM2	10581	19382257	DENV1	p53-deficient H1299	Microarray	Dengue infected p53-deficient cell line H1299 vs uninfected cell line	up	Gene expression profiling by microarray analysis reveals an important role for caspase-1 in dengue virus-induced p53-mediated apoptosis.	-
IFITM2	10581	19382257	DENV1	p53-deficient H1299	Microarray	Dengue infected p53-knockin cell line, H273 vs uninfected cell line	up	Gene expression profiling by microarray analysis reveals an important role for caspase-1 in dengue virus-induced p53-mediated apoptosis.	-
IFNB1	3456	19837110	DENV2	HepG2 cells	Microarray, Real time PCR	Dengue infected HepG2 cells vs uninfected cells	up	Gene expression analysis during dengue virus infection in HepG2 cells reveals virus control of innate immune response.	-
IFNGR2	3460	15584975	DENV2	Human monocyte derived macrophages	Microarray	Dengue infected Human monocyte derived macrophages 6hr vs Dengue uninfected cells	down	Gene Expression in Human Macrophages Infected with Dengue Virus Serotype-2	-
IFRD1	3475	18444802	DF and DHF	Patient Blood	Microarray	patients with dengue fever (DHF) in acute phase vs convalescent phase	up	Differences in global gene expression in peripheral blood mononuclear cells indicate a significant role of the innate responses in progression of dengue fever but not dengue hemorrhagic fever.	-
IL10RA	3587	18444802	DF and DHF	Patient Blood	Microarray	patients with dengue fever (DHF) in acute phase vs convalescent phase	up	Differences in global gene expression in peripheral blood mononuclear cells indicate a significant role of the innate responses in progression of dengue fever but not dengue hemorrhagic fever.	-
IL18RAP	8807	18444802	DF and DHF	Patient Blood	Microarray	patients with dengue fever (DHF) in acute phase vs convalescent phase	up	Differences in global gene expression in peripheral blood mononuclear cells indicate a significant role of the innate responses in progression of dengue fever but not dengue hemorrhagic fever.	-
IL1B	3553	15584975	DENV2	Human monocyte derived macrophages	Microarray	Dengue infected Human monocyte derived macrophages 6hr vs Dengue uninfected cells	up	Gene Expression in Human Macrophages Infected with Dengue Virus Serotype-2	-
IL1B	3553	14557666	DENV2	HUVEC	Microarray	Dengue infected HUVECs vs uninfected cells	up	Dengue virus induces novel changes in gene expression of human umbilical vein endothelial cells.	-
IL1B	3553	18444802	DF and DHF	Patient Blood	Microarray	patients with dengue fever (DHF) in acute phase vs convalescent phase	up	Differences in global gene expression in peripheral blood mononuclear cells indicate a significant role of the innate responses in progression of dengue fever but not dengue hemorrhagic fever.	-
IL23A	51561	18444802	DF and DHF	Patient Blood	Microarray	patients with dengue fever (DHF) in acute phase vs convalescent phase	up	Differences in global gene expression in peripheral blood mononuclear cells indicate a significant role of the innate responses in progression of dengue fever but not dengue hemorrhagic fever.	-
IL2RA	3559	18455750	DENV2	THP1	Microarray	THP1 cells infected with NO-resistance viruses (isolated from DHF patients) vs uninfected cells	down	Clinical isolates of dengue virus with distinctive susceptibility to nitric oxide radical induce differential gene responses in THP-1 cells.	-
IL2RB	3560	18455750	DENV2	THP1	Microarray	THP1 cells infected with NO-resistance viruses (isolated from DHF patients) vs uninfected cells	up	Clinical isolates of dengue virus with distinctive susceptibility to nitric oxide radical induce differential gene responses in THP-1 cells.	-
IL3RA	3563	18455750	DENV2	THP1	Microarray	THP1 cells infected with NO-sensitive viruses (isolated from DF patients) vs uninfected cells	up	Clinical isolates of dengue virus with distinctive susceptibility to nitric oxide radical induce differential gene responses in THP-1 cells.	-
IL4R	3566	18444802	DF and DHF	Patient Blood	Microarray	patients with dengue fever (DHF) in acute phase vs convalescent phase	up	Differences in global gene expression in peripheral blood mononuclear cells indicate a significant role of the innate responses in progression of dengue fever but not dengue hemorrhagic fever.	-
IL4R	3566	18455750	DENV2	THP1	Microarray	THP1 cells infected with NO-sensitive viruses (isolated from DF patients) vs uninfected cells	up	Clinical isolates of dengue virus with distinctive susceptibility to nitric oxide radical induce differential gene responses in THP-1 cells.	-
IL5RA	3568	18455750	DENV2	THP1	Microarray	THP1 cells infected with NO-sensitive viruses (isolated from DF patients) vs uninfected cells	down	Clinical isolates of dengue virus with distinctive susceptibility to nitric oxide radical induce differential gene responses in THP-1 cells.	-
IL6	3569	19837110	DENV2	HepG2 cells	Microarray, Real time PCR	Dengue infected HepG2 cells vs uninfected cells	up	Gene expression analysis during dengue virus infection in HepG2 cells reveals virus control of innate immune response.	-
IL6	3569	18455750	DENV2	THP1	Microarray	THP1 cells infected with NO-resistance viruses (isolated from DHF patients) vs uninfected cells	up	Clinical isolates of dengue virus with distinctive susceptibility to nitric oxide radical induce differential gene responses in THP-1 cells.	-
IL7	3574	19382257	DENV1	p53-deficient H1299	Microarray	Dengue infected p53-knockin cell line, H273 vs uninfected cell line	up	Gene expression profiling by microarray analysis reveals an important role for caspase-1 in dengue virus-induced p53-mediated apoptosis.	-
IL7	3574	18455750	DENV2	THP1	Microarray	THP1 cells infected with NO-resistance viruses (isolated from DHF patients) vs uninfected cells	up	Clinical isolates of dengue virus with distinctive susceptibility to nitric oxide radical induce differential gene responses in THP-1 cells.	-
IL9R	3581	18455750	DENV2	THP1	Microarray	THP1 cells infected with NO-sensitive viruses (isolated from DF patients) vs uninfected cells	down	Clinical isolates of dengue virus with distinctive susceptibility to nitric oxide radical induce differential gene responses in THP-1 cells.	-
IRF1	3659	19382257	DENV1	p53-deficient H1299	Microarray	Dengue infected p53-knockin cell line, H273 vs uninfected cell line	up	Gene expression profiling by microarray analysis reveals an important role for caspase-1 in dengue virus-induced p53-mediated apoptosis.	-
IRF2	3660	18455750	DENV2	THP1	Microarray	THP1 cells infected with NO-sensitive viruses (isolated from DF patients) vs uninfected cells	down	Clinical isolates of dengue virus with distinctive susceptibility to nitric oxide radical induce differential gene responses in THP-1 cells.	-
IRF4	3662	18455750	DENV2	THP1	Microarray	THP1 cells infected with NO-resistance viruses (isolated from DHF patients) vs uninfected cells	up	Clinical isolates of dengue virus with distinctive susceptibility to nitric oxide radical induce differential gene responses in THP-1 cells.	-
IRF7	3665	19382257	DENV1	p53-deficient H1299	Microarray	Dengue infected p53-deficient cell line H1299 vs uninfected cell line	up	Gene expression profiling by microarray analysis reveals an important role for caspase-1 in dengue virus-induced p53-mediated apoptosis.	-
IRF7	3665	19382257	DENV1	p53-deficient H1299	Microarray	Dengue infected p53-knockin cell line, H273 vs uninfected cell line	up	Gene expression profiling by microarray analysis reveals an important role for caspase-1 in dengue virus-induced p53-mediated apoptosis.	-
IRF9	10379	19382257	DENV1	p53-deficient H1299	Microarray	Dengue infected p53-deficient cell line H1299 vs uninfected cell line	up	Gene expression profiling by microarray analysis reveals an important role for caspase-1 in dengue virus-induced p53-mediated apoptosis.	-
IRF9	10379	19382257	DENV1	p53-deficient H1299	Microarray	Dengue infected p53-knockin cell line, H273 vs uninfected cell line	up	Gene expression profiling by microarray analysis reveals an important role for caspase-1 in dengue virus-induced p53-mediated apoptosis.	-
ISG15	9636	19382257	DENV1	p53-deficient H1299	Microarray	Dengue infected p53-deficient cell line H1299 vs uninfected cell line	up	Gene expression profiling by microarray analysis reveals an important role for caspase-1 in dengue virus-induced p53-mediated apoptosis.	-
ISG15	9636	19382257	DENV1	p53-deficient H1299	Microarray	Dengue infected p53-knockin cell line, H273 vs uninfected cell line	up	Gene expression profiling by microarray analysis reveals an important role for caspase-1 in dengue virus-induced p53-mediated apoptosis.	-
ISG15	9636	18444802	DF and DHF	Patient Blood	Microarray	patients with dengue fever (DF) in acute phase vs convalescent phase	up	Differences in global gene expression in peripheral blood mononuclear cells indicate a significant role of the innate responses in progression of dengue fever but not dengue hemorrhagic fever.	-
ISG20	3669	19382257	DENV1	p53-deficient H1299	Microarray	Dengue infected p53-deficient cell line H1299 vs uninfected cell line	up	Gene expression profiling by microarray analysis reveals an important role for caspase-1 in dengue virus-induced p53-mediated apoptosis.	-
ISG20	3669	19382257	DENV1	p53-deficient H1299	Microarray	Dengue infected p53-knockin cell line, H273 vs uninfected cell line	up	Gene expression profiling by microarray analysis reveals an important role for caspase-1 in dengue virus-induced p53-mediated apoptosis.	-
ITGA2	3673	18455750	DENV2	THP1	Microarray	THP1 cells infected with NO-sensitive viruses (isolated from DF patients) vs uninfected cells	up	Clinical isolates of dengue virus with distinctive susceptibility to nitric oxide radical induce differential gene responses in THP-1 cells.	-
ITGAL	3683	18455750	DENV2	THP1	Microarray	THP1 cells infected with NO-resistance viruses (isolated from DHF patients) vs uninfected cells	down	Clinical isolates of dengue virus with distinctive susceptibility to nitric oxide radical induce differential gene responses in THP-1 cells.	-
ITGAL	3683	18455750	DENV2	THP1	Microarray	THP1 cells infected with NO-sensitive viruses (isolated from DF patients) vs uninfected cells	down	Clinical isolates of dengue virus with distinctive susceptibility to nitric oxide radical induce differential gene responses in THP-1 cells.	-
ITGAX	3687	18455750	DENV2	THP1	Microarray	THP1 cells infected with NO-resistance viruses (isolated from DHF patients) vs uninfected cells	up	Clinical isolates of dengue virus with distinctive susceptibility to nitric oxide radical induce differential gene responses in THP-1 cells.	-
ITGB3	3690	18455750	DENV2	THP1	Microarray	THP1 cells infected with NO-resistance viruses (isolated from DHF patients) vs uninfected cells	up	Clinical isolates of dengue virus with distinctive susceptibility to nitric oxide radical induce differential gene responses in THP-1 cells.	-
ITGB5	3693	19382257	DENV1	p53-deficient H1299	Microarray	Dengue infected p53-deficient cell line H1299 vs uninfected cell line	up	Gene expression profiling by microarray analysis reveals an important role for caspase-1 in dengue virus-induced p53-mediated apoptosis.	-
ITK	3702	18444802	DF and DHF	Patient Blood	Microarray	patients with dengue fever (DHF) in acute phase vs convalescent phase	up	Differences in global gene expression in peripheral blood mononuclear cells indicate a significant role of the innate responses in progression of dengue fever but not dengue hemorrhagic fever.	-
KDM5D	8284	16112753	DENV2	ECV304	Microarray	Dengue infected ECV304 endothelial-like cells vs unifected cells	down	Microarray and real-time RT-PCR analyses of a novel set of differentially expressed human genes in ECV304 endothelial-like cells infected with dengue virus type 2.	-
KIF20A	10112	19382257	DENV1	p53-deficient H1299	Microarray	Dengue infected p53-deficient cell line H1299 vs uninfected cell line	up	Gene expression profiling by microarray analysis reveals an important role for caspase-1 in dengue virus-induced p53-mediated apoptosis.	-
KIF23	9493	19382257	DENV1	p53-deficient H1299	Microarray	Dengue infected p53-deficient cell line H1299 vs uninfected cell line	up	Gene expression profiling by microarray analysis reveals an important role for caspase-1 in dengue virus-induced p53-mediated apoptosis.	-
KIF5C	3800	16112753	DENV2	ECV304	Microarray	Dengue infected ECV304 endothelial-like cells vs unifected cells	down	Microarray and real-time RT-PCR analyses of a novel set of differentially expressed human genes in ECV304 endothelial-like cells infected with dengue virus type 2.	-
KLF4	9314	19382257	DENV1	p53-deficient H1299	Microarray	Dengue infected p53-deficient cell line H1299 vs uninfected cell line	up	Gene expression profiling by microarray analysis reveals an important role for caspase-1 in dengue virus-induced p53-mediated apoptosis.	-
KLRB1	3820	18444802	DF and DHF	Patient Blood	Microarray	patients with dengue fever (DHF) in acute phase vs convalescent phase	up	Differences in global gene expression in peripheral blood mononuclear cells indicate a significant role of the innate responses in progression of dengue fever but not dengue hemorrhagic fever.	-
KLRC3	3823	16112753	DENV2	ECV304	Microarray	Dengue infected ECV304 endothelial-like cells vs unifected cells	down	Microarray and real-time RT-PCR analyses of a novel set of differentially expressed human genes in ECV304 endothelial-like cells infected with dengue virus type 2.	-
KRT33B	3884	16112753	DENV2	ECV304	Microarray	Dengue infected ECV304 endothelial-like cells vs unifected cells	down	Microarray and real-time RT-PCR analyses of a novel set of differentially expressed human genes in ECV304 endothelial-like cells infected with dengue virus type 2.	-
LAMP3	27074	19382257	DENV1	p53-deficient H1299	Microarray	Dengue infected p53-knockin cell line, H273 vs uninfected cell line	up	Gene expression profiling by microarray analysis reveals an important role for caspase-1 in dengue virus-induced p53-mediated apoptosis.	-
LANCL1	10314	16112753	DENV2	ECV304	Microarray	Dengue infected ECV304 endothelial-like cells vs unifected cells	down	Microarray and real-time RT-PCR analyses of a novel set of differentially expressed human genes in ECV304 endothelial-like cells infected with dengue virus type 2.	-
LAP3	51056	19382257	DENV1	p53-deficient H1299	Microarray	Dengue infected p53-knockin cell line, H273 vs uninfected cell line	up	Gene expression profiling by microarray analysis reveals an important role for caspase-1 in dengue virus-induced p53-mediated apoptosis.	-
LDHA	3939	19382257	DENV1	p53-deficient H1299	Microarray	Dengue infected p53-deficient cell line H1299 vs uninfected cell line	up	Gene expression profiling by microarray analysis reveals an important role for caspase-1 in dengue virus-induced p53-mediated apoptosis.	-
LGALS2	3957	18444802	DF and DHF	Patient Blood	Microarray	patients with dengue fever (DHF) in acute phase vs convalescent phase	up	Differences in global gene expression in peripheral blood mononuclear cells indicate a significant role of the innate responses in progression of dengue fever but not dengue hemorrhagic fever.	-
LGALS3BP	3959	19382257	DENV1	p53-deficient H1299	Microarray	Dengue infected p53-knockin cell line, H273 vs uninfected cell line	up	Gene expression profiling by microarray analysis reveals an important role for caspase-1 in dengue virus-induced p53-mediated apoptosis.	-
LGALS9	3965	14557666	DENV2	HUVEC	Microarray	Dengue infected HUVECs vs uninfected cells	up	Dengue virus induces novel changes in gene expression of human umbilical vein endothelial cells.	-
LIF	3976	18444802	DF and DHF	Patient Blood	Microarray	patients with dengue fever (DHF) in acute phase vs convalescent phase	up	Differences in global gene expression in peripheral blood mononuclear cells indicate a significant role of the innate responses in progression of dengue fever but not dengue hemorrhagic fever.	-
LRAT	9227	19382257	DENV1	p53-deficient H1299	Microarray	Dengue infected p53-deficient cell line H1299 vs uninfected cell line	up	Gene expression profiling by microarray analysis reveals an important role for caspase-1 in dengue virus-induced p53-mediated apoptosis.	-
LST1	7940	18444802	DF and DHF	Patient Blood	Microarray	patients with dengue fever (DHF) in acute phase vs convalescent phase	up	Differences in global gene expression in peripheral blood mononuclear cells indicate a significant role of the innate responses in progression of dengue fever but not dengue hemorrhagic fever.	-
LY6E	4061	19382257	DENV1	p53-deficient H1299	Microarray	Dengue infected p53-deficient cell line H1299 vs uninfected cell line	up	Gene expression profiling by microarray analysis reveals an important role for caspase-1 in dengue virus-induced p53-mediated apoptosis.	-
LY6E	4061	19382257	DENV1	p53-deficient H1299	Microarray	Dengue infected p53-knockin cell line, H273 vs uninfected cell line	up	Gene expression profiling by microarray analysis reveals an important role for caspase-1 in dengue virus-induced p53-mediated apoptosis.	-
LY6E	4061	18444802	DF and DHF	Patient Blood	Microarray	patients with dengue fever (DF) in acute phase vs convalescent phase	up	Differences in global gene expression in peripheral blood mononuclear cells indicate a significant role of the innate responses in progression of dengue fever but not dengue hemorrhagic fever.	-
MAGED2	10916	19382257	DENV1	p53-deficient H1299	Microarray	Dengue infected p53-knockin cell line, H273 vs uninfected cell line	up	Gene expression profiling by microarray analysis reveals an important role for caspase-1 in dengue virus-induced p53-mediated apoptosis.	-
MAL	4118	18444802	DF and DHF	Patient Blood	Microarray	patients with dengue fever (DHF) in acute phase vs convalescent phase	up	Differences in global gene expression in peripheral blood mononuclear cells indicate a significant role of the innate responses in progression of dengue fever but not dengue hemorrhagic fever.	-
MAL	4118	18455750	DENV2	THP1	Microarray	THP1 cells infected with NO-resistance viruses (isolated from DHF patients) vs uninfected cells	up	Clinical isolates of dengue virus with distinctive susceptibility to nitric oxide radical induce differential gene responses in THP-1 cells.	-
MAP4K4	9448	16112753	DENV2	ECV304	Microarray	Dengue infected ECV304 endothelial-like cells vs unifected cells	up	Microarray and real-time RT-PCR analyses of a novel set of differentially expressed human genes in ECV304 endothelial-like cells infected with dengue virus type 2.	-
MAST4	375449	16112753	DENV2	ECV304	Microarray	Dengue infected ECV304 endothelial-like cells vs unifected cells	down	Microarray and real-time RT-PCR analyses of a novel set of differentially expressed human genes in ECV304 endothelial-like cells infected with dengue virus type 2.	-
MFNG	4242	16112753	DENV2	ECV304	Microarray	Dengue infected ECV304 endothelial-like cells vs unifected cells	down	Microarray and real-time RT-PCR analyses of a novel set of differentially expressed human genes in ECV304 endothelial-like cells infected with dengue virus type 2.	-
MFSD12	126321	19382257	DENV1	p53-deficient H1299	Microarray	Dengue infected p53-knockin cell line, H273 vs uninfected cell line	up	Gene expression profiling by microarray analysis reveals an important role for caspase-1 in dengue virus-induced p53-mediated apoptosis.	-
MMP10	4319	15584975	DENV2	Human monocyte derived macrophages	Microarray	Dengue infected Human monocyte derived macrophages 24hr vs Dengue uninfected cells	down	Gene Expression in Human Macrophages Infected with Dengue Virus Serotype-2	-
MMP10	4319	15584975	DENV2	Human monocyte derived macrophages	Microarray	Dengue infected Human monocyte derived macrophages 6hr vs Dengue uninfected cells	down	Gene Expression in Human Macrophages Infected with Dengue Virus Serotype-2	-
MMP13	4322	15584975	DENV2	Human monocyte derived macrophages	Microarray	Dengue infected Human monocyte derived macrophages 24hr vs Dengue uninfected cells	up	Gene Expression in Human Macrophages Infected with Dengue Virus Serotype-2	-
MMP9	4318	15584975	DENV2	Human monocyte derived macrophages	Microarray	Dengue infected Human monocyte derived macrophages 6hr vs Dengue uninfected cells	down	Gene Expression in Human Macrophages Infected with Dengue Virus Serotype-2	-
MRPS12	6183	19382257	DENV1	p53-deficient H1299	Microarray	Dengue infected p53-knockin cell line, H273 vs uninfected cell line	up	Gene expression profiling by microarray analysis reveals an important role for caspase-1 in dengue virus-induced p53-mediated apoptosis.	-
MS4A1	931	16112753	DENV2	ECV304	Microarray	Dengue infected ECV304 endothelial-like cells vs unifected cells	down	Microarray and real-time RT-PCR analyses of a novel set of differentially expressed human genes in ECV304 endothelial-like cells infected with dengue virus type 2.	-
MT1G	4495	19382257	DENV1	p53-deficient H1299	Microarray	Dengue infected p53-knockin cell line, H273 vs uninfected cell line	up	Gene expression profiling by microarray analysis reveals an important role for caspase-1 in dengue virus-induced p53-mediated apoptosis.	-
MT1H	4496	19382257	DENV1	p53-deficient H1299	Microarray	Dengue infected p53-knockin cell line, H273 vs uninfected cell line	up	Gene expression profiling by microarray analysis reveals an important role for caspase-1 in dengue virus-induced p53-mediated apoptosis.	-
MT1X	4501	19382257	DENV1	p53-deficient H1299	Microarray	Dengue infected p53-knockin cell line, H273 vs uninfected cell line	up	Gene expression profiling by microarray analysis reveals an important role for caspase-1 in dengue virus-induced p53-mediated apoptosis.	-
MT2A	4502	19382257	DENV1	p53-deficient H1299	Microarray	Dengue infected p53-knockin cell line, H273 vs uninfected cell line	up	Gene expression profiling by microarray analysis reveals an important role for caspase-1 in dengue virus-induced p53-mediated apoptosis.	-
MTOR	2475	19855901	DENV2	HepG2 cells	Microarray, qPCR	Dengue infected HepG2 cells 6hr vs 0hr	up	Dengue virus-induced regulation of the host cell translational machinery.	-
MX1	4599	14557666	DENV2	HUVEC	Microarray	Dengue infected HUVECs vs uninfected cells	up	Dengue virus induces novel changes in gene expression of human umbilical vein endothelial cells.	-
MX1	4599	19382257	DENV1	p53-deficient H1299	Microarray	Dengue infected p53-deficient cell line H1299 vs uninfected cell line	up	Gene expression profiling by microarray analysis reveals an important role for caspase-1 in dengue virus-induced p53-mediated apoptosis.	-
MX1	4599	18444802	DF and DHF	Patient Blood	Microarray	patients with dengue fever (DF) in acute phase vs convalescent phase	up	Differences in global gene expression in peripheral blood mononuclear cells indicate a significant role of the innate responses in progression of dengue fever but not dengue hemorrhagic fever.	-
NAMPT	10135	15584975	DENV2	Human monocyte derived macrophages	Microarray	Dengue infected Human monocyte derived macrophages 6hr vs Dengue uninfected cells	up	Gene Expression in Human Macrophages Infected with Dengue Virus Serotype-2	-
NAPA	8775	19382257	DENV1	p53-deficient H1299	Microarray	Dengue infected p53-knockin cell line, H273 vs uninfected cell line	up	Gene expression profiling by microarray analysis reveals an important role for caspase-1 in dengue virus-induced p53-mediated apoptosis.	-
NBN	4683	16112753	DENV2	ECV304	Microarray	Dengue infected ECV304 endothelial-like cells vs unifected cells	down	Microarray and real-time RT-PCR analyses of a novel set of differentially expressed human genes in ECV304 endothelial-like cells infected with dengue virus type 2.	-
NCAPG	64151	19382257	DENV1	p53-deficient H1299	Microarray	Dengue infected p53-deficient cell line H1299 vs uninfected cell line	up	Gene expression profiling by microarray analysis reveals an important role for caspase-1 in dengue virus-induced p53-mediated apoptosis.	-
NCR3	259197	18444802	DF and DHF	Patient Blood	Microarray	patients with dengue fever (DHF) in acute phase vs convalescent phase	up	Differences in global gene expression in peripheral blood mononuclear cells indicate a significant role of the innate responses in progression of dengue fever but not dengue hemorrhagic fever.	-
NDC80	10403	19382257	DENV1	p53-deficient H1299	Microarray	Dengue infected p53-deficient cell line H1299 vs uninfected cell line	up	Gene expression profiling by microarray analysis reveals an important role for caspase-1 in dengue virus-induced p53-mediated apoptosis.	-
NDUFS2	4720	16112753	DENV2	ECV304	Microarray	Dengue infected ECV304 endothelial-like cells vs unifected cells	down	Microarray and real-time RT-PCR analyses of a novel set of differentially expressed human genes in ECV304 endothelial-like cells infected with dengue virus type 2.	-
NDUFV2	4729	16112753	DENV2	ECV304	Microarray	Dengue infected ECV304 endothelial-like cells vs unifected cells	down	Microarray and real-time RT-PCR analyses of a novel set of differentially expressed human genes in ECV304 endothelial-like cells infected with dengue virus type 2.	-
NEK2	4751	19382257	DENV1	p53-deficient H1299	Microarray	Dengue infected p53-deficient cell line H1299 vs uninfected cell line	up	Gene expression profiling by microarray analysis reveals an important role for caspase-1 in dengue virus-induced p53-mediated apoptosis.	-
NEMF	9147	16112753	DENV2	ECV304	Microarray	Dengue infected ECV304 endothelial-like cells vs unifected cells	up	Microarray and real-time RT-PCR analyses of a novel set of differentially expressed human genes in ECV304 endothelial-like cells infected with dengue virus type 2.	-
NFIB	4781	19382257	DENV1	p53-deficient H1299	Microarray	Dengue infected p53-knockin cell line, H273 vs uninfected cell line	up	Gene expression profiling by microarray analysis reveals an important role for caspase-1 in dengue virus-induced p53-mediated apoptosis.	-
NFKBIA	4792	16112753	DENV2	ECV304	Microarray	Dengue infected ECV304 endothelial-like cells vs unifected cells	up	Microarray and real-time RT-PCR analyses of a novel set of differentially expressed human genes in ECV304 endothelial-like cells infected with dengue virus type 2.	-
NMI	9111	19382257	DENV1	p53-deficient H1299	Microarray	Dengue infected p53-knockin cell line, H273 vs uninfected cell line	up	Gene expression profiling by microarray analysis reveals an important role for caspase-1 in dengue virus-induced p53-mediated apoptosis.	-
NMU	10874	19382257	DENV1	p53-deficient H1299	Microarray	Dengue infected p53-deficient cell line H1299 vs uninfected cell line	up	Gene expression profiling by microarray analysis reveals an important role for caspase-1 in dengue virus-induced p53-mediated apoptosis.	-
NOTCH4	4855	16112753	DENV2	ECV304	Microarray	Dengue infected ECV304 endothelial-like cells vs unifected cells	up	Microarray and real-time RT-PCR analyses of a novel set of differentially expressed human genes in ECV304 endothelial-like cells infected with dengue virus type 2.	-
NRGN	4900	16112753	DENV2	ECV304	Microarray	Dengue infected ECV304 endothelial-like cells vs unifected cells	down	Microarray and real-time RT-PCR analyses of a novel set of differentially expressed human genes in ECV304 endothelial-like cells infected with dengue virus type 2.	-
NUDT1	4521	19382257	DENV1	p53-deficient H1299	Microarray	Dengue infected p53-deficient cell line H1299 vs uninfected cell line	up	Gene expression profiling by microarray analysis reveals an important role for caspase-1 in dengue virus-induced p53-mediated apoptosis.	-
OAS1	4938	14557666	DENV2	HUVEC	Microarray	Dengue infected HUVECs vs uninfected cells	up	Dengue virus induces novel changes in gene expression of human umbilical vein endothelial cells.	-
OAS1	4938	19382257	DENV1	p53-deficient H1299	Microarray	Dengue infected p53-deficient cell line H1299 vs uninfected cell line	up	Gene expression profiling by microarray analysis reveals an important role for caspase-1 in dengue virus-induced p53-mediated apoptosis.	-
OAS1	4938	19382257	DENV1	p53-deficient H1299	Microarray	Dengue infected p53-knockin cell line, H273 vs uninfected cell line	up	Gene expression profiling by microarray analysis reveals an important role for caspase-1 in dengue virus-induced p53-mediated apoptosis.	-
OAS2	4939	19382257	DENV1	p53-deficient H1299	Microarray	Dengue infected p53-knockin cell line, H273 vs uninfected cell line	up	Gene expression profiling by microarray analysis reveals an important role for caspase-1 in dengue virus-induced p53-mediated apoptosis.	-
OAS2	4939	19382257	DENV1	p53-deficient H1299	Microarray	Dengue infected p53-deficient cell line H1299 vs uninfected cell line	up	Gene expression profiling by microarray analysis reveals an important role for caspase-1 in dengue virus-induced p53-mediated apoptosis.	-
OAS3	4940	19382257	DENV1	p53-deficient H1299	Microarray	Dengue infected p53-deficient cell line H1299 vs uninfected cell line	up	Gene expression profiling by microarray analysis reveals an important role for caspase-1 in dengue virus-induced p53-mediated apoptosis.	-
OAS3	4940	19382257	DENV1	p53-deficient H1299	Microarray	Dengue infected p53-knockin cell line, H273 vs uninfected cell line	up	Gene expression profiling by microarray analysis reveals an important role for caspase-1 in dengue virus-induced p53-mediated apoptosis.	-
OASL	8638	14557666	DENV2	HUVEC	Microarray	Dengue infected HUVECs vs uninfected cells	up	Dengue virus induces novel changes in gene expression of human umbilical vein endothelial cells.	-
OASL	8638	19382257	DENV1	p53-deficient H1299	Microarray	Dengue infected p53-deficient cell line H1299 vs uninfected cell line	up	Gene expression profiling by microarray analysis reveals an important role for caspase-1 in dengue virus-induced p53-mediated apoptosis.	-
OASL	8638	19382257	DENV1	p53-deficient H1299	Microarray	Dengue infected p53-knockin cell line, H273 vs uninfected cell line	up	Gene expression profiling by microarray analysis reveals an important role for caspase-1 in dengue virus-induced p53-mediated apoptosis.	-
PARP12	64761	19382257	DENV1	p53-deficient H1299	Microarray	Dengue infected p53-knockin cell line, H273 vs uninfected cell line	up	Gene expression profiling by microarray analysis reveals an important role for caspase-1 in dengue virus-induced p53-mediated apoptosis.	-
PBK	55872	19382257	DENV1	p53-deficient H1299	Microarray	Dengue infected p53-deficient cell line H1299 vs uninfected cell line	up	Gene expression profiling by microarray analysis reveals an important role for caspase-1 in dengue virus-induced p53-mediated apoptosis.	-
PCDHA12	56137	19382257	DENV1	p53-deficient H1299	Microarray	Dengue infected p53-knockin cell line, H273 vs uninfected cell line	up	Gene expression profiling by microarray analysis reveals an important role for caspase-1 in dengue virus-induced p53-mediated apoptosis.	-
PCMT1	5110	16112753	DENV2	ECV304	Microarray	Dengue infected ECV304 endothelial-like cells vs unifected cells	down	Microarray and real-time RT-PCR analyses of a novel set of differentially expressed human genes in ECV304 endothelial-like cells infected with dengue virus type 2.	-
PDE4C	5143	16112753	DENV2	ECV304	Microarray	Dengue infected ECV304 endothelial-like cells vs unifected cells	down	Microarray and real-time RT-PCR analyses of a novel set of differentially expressed human genes in ECV304 endothelial-like cells infected with dengue virus type 2.	-
PDGFRL	5157	19382257	DENV1	p53-deficient H1299	Microarray	Dengue infected p53-knockin cell line, H273 vs uninfected cell line	up	Gene expression profiling by microarray analysis reveals an important role for caspase-1 in dengue virus-induced p53-mediated apoptosis.	-
PGK1	5230	19382257	DENV1	p53-deficient H1299	Microarray	Dengue infected p53-deficient cell line H1299 vs uninfected cell line	up	Gene expression profiling by microarray analysis reveals an important role for caspase-1 in dengue virus-induced p53-mediated apoptosis.	-
PHF11	51131	19382257	DENV1	p53-deficient H1299	Microarray	Dengue infected p53-knockin cell line, H273 vs uninfected cell line	up	Gene expression profiling by microarray analysis reveals an important role for caspase-1 in dengue virus-induced p53-mediated apoptosis.	-
PHLDA2	7262	16112753	DENV2	ECV304	Microarray	Dengue infected ECV304 endothelial-like cells vs unifected cells	down	Microarray and real-time RT-PCR analyses of a novel set of differentially expressed human genes in ECV304 endothelial-like cells infected with dengue virus type 2.	-
PIAS2	9063	16112753	DENV2	ECV304	Microarray	Dengue infected ECV304 endothelial-like cells vs unifected cells	up	Microarray and real-time RT-PCR analyses of a novel set of differentially expressed human genes in ECV304 endothelial-like cells infected with dengue virus type 2.	-
PLSCR1	5359	14557666	DENV2	HUVEC	Microarray	Dengue infected HUVECs vs uninfected cells	up	Dengue virus induces novel changes in gene expression of human umbilical vein endothelial cells.	-
PLSCR1	5359	19382257	DENV1	p53-deficient H1299	Microarray	Dengue infected p53-deficient cell line H1299 vs uninfected cell line	up	Gene expression profiling by microarray analysis reveals an important role for caspase-1 in dengue virus-induced p53-mediated apoptosis.	-
PLSCR1	5359	19382257	DENV1	p53-deficient H1299	Microarray	Dengue infected p53-knockin cell line, H273 vs uninfected cell line	up	Gene expression profiling by microarray analysis reveals an important role for caspase-1 in dengue virus-induced p53-mediated apoptosis.	-
PMAIP1	5366	19382257	DENV1	p53-deficient H1299	Microarray	Dengue infected p53-knockin cell line, H273 vs uninfected cell line	up	Gene expression profiling by microarray analysis reveals an important role for caspase-1 in dengue virus-induced p53-mediated apoptosis.	-
PMF1	11243	16112753	DENV2	ECV304	Microarray	Dengue infected ECV304 endothelial-like cells vs unifected cells	down	Microarray and real-time RT-PCR analyses of a novel set of differentially expressed human genes in ECV304 endothelial-like cells infected with dengue virus type 2.	-
PML	5371	19382257	DENV1	p53-deficient H1299	Microarray	Dengue infected p53-knockin cell line, H273 vs uninfected cell line	up	Gene expression profiling by microarray analysis reveals an important role for caspase-1 in dengue virus-induced p53-mediated apoptosis.	-
PML	5371	19382257	DENV1	p53-deficient H1299	Microarray	Dengue infected p53-deficient cell line H1299 vs uninfected cell line	up	Gene expression profiling by microarray analysis reveals an important role for caspase-1 in dengue virus-induced p53-mediated apoptosis.	-
PNRC1	10957	16112753	DENV2	ECV304	Microarray	Dengue infected ECV304 endothelial-like cells vs unifected cells	down	Microarray and real-time RT-PCR analyses of a novel set of differentially expressed human genes in ECV304 endothelial-like cells infected with dengue virus type 2.	-
POMT1	10585	16112753	DENV2	ECV304	Microarray	Dengue infected ECV304 endothelial-like cells vs unifected cells	down	Microarray and real-time RT-PCR analyses of a novel set of differentially expressed human genes in ECV304 endothelial-like cells infected with dengue virus type 2.	-
PRB4	5545	16112753	DENV2	ECV304	Microarray	Dengue infected ECV304 endothelial-like cells vs unifected cells	down	Microarray and real-time RT-PCR analyses of a novel set of differentially expressed human genes in ECV304 endothelial-like cells infected with dengue virus type 2.	-
PRKD2	25865	19382257	DENV1	p53-deficient H1299	Microarray	Dengue infected p53-knockin cell line, H273 vs uninfected cell line	up	Gene expression profiling by microarray analysis reveals an important role for caspase-1 in dengue virus-induced p53-mediated apoptosis.	-
PRKX	5613	16112753	DENV2	ECV304	Microarray	Dengue infected ECV304 endothelial-like cells vs unifected cells	down	Microarray and real-time RT-PCR analyses of a novel set of differentially expressed human genes in ECV304 endothelial-like cells infected with dengue virus type 2.	-
PRODH	5625	16112753	DENV2	ECV304	Microarray	Dengue infected ECV304 endothelial-like cells vs unifected cells	down	Microarray and real-time RT-PCR analyses of a novel set of differentially expressed human genes in ECV304 endothelial-like cells infected with dengue virus type 2.	-
PROZ	8858	16112753	DENV2	ECV304	Microarray	Dengue infected ECV304 endothelial-like cells vs unifected cells	up	Microarray and real-time RT-PCR analyses of a novel set of differentially expressed human genes in ECV304 endothelial-like cells infected with dengue virus type 2.	-
PRRC2A	7916	18455750	DENV2	THP1	Microarray	THP1 cells infected with NO-sensitive viruses (isolated from DF patients) vs uninfected cells	up	Clinical isolates of dengue virus with distinctive susceptibility to nitric oxide radical induce differential gene responses in THP-1 cells.	-
PSMB10	5699	19382257	DENV1	p53-deficient H1299	Microarray	Dengue infected p53-knockin cell line, H273 vs uninfected cell line	up	Gene expression profiling by microarray analysis reveals an important role for caspase-1 in dengue virus-induced p53-mediated apoptosis.	-
PSMB8	5696	19382257	DENV1	p53-deficient H1299	Microarray	Dengue infected p53-deficient cell line H1299 vs uninfected cell line	up	Gene expression profiling by microarray analysis reveals an important role for caspase-1 in dengue virus-induced p53-mediated apoptosis.	-
PSMB8	5696	19382257	DENV1	p53-deficient H1299	Microarray	Dengue infected p53-knockin cell line, H273 vs uninfected cell line	up	Gene expression profiling by microarray analysis reveals an important role for caspase-1 in dengue virus-induced p53-mediated apoptosis.	-
PSMB9	5698	19382257	DENV1	p53-deficient H1299	Microarray	Dengue infected p53-deficient cell line H1299 vs uninfected cell line	up	Gene expression profiling by microarray analysis reveals an important role for caspase-1 in dengue virus-induced p53-mediated apoptosis.	-
PSMB9	5698	19382257	DENV1	p53-deficient H1299	Microarray	Dengue infected p53-knockin cell line, H273 vs uninfected cell line	up	Gene expression profiling by microarray analysis reveals an important role for caspase-1 in dengue virus-induced p53-mediated apoptosis.	-
PSMC6	5706	16112753	DENV2	ECV304	Microarray	Dengue infected ECV304 endothelial-like cells vs unifected cells	down	Microarray and real-time RT-PCR analyses of a novel set of differentially expressed human genes in ECV304 endothelial-like cells infected with dengue virus type 2.	-
PSME2	5721	19382257	DENV1	p53-deficient H1299	Microarray	Dengue infected p53-deficient cell line H1299 vs uninfected cell line	up	Gene expression profiling by microarray analysis reveals an important role for caspase-1 in dengue virus-induced p53-mediated apoptosis.	-
PSME2	5721	19382257	DENV1	p53-deficient H1299	Microarray	Dengue infected p53-knockin cell line, H273 vs uninfected cell line	up	Gene expression profiling by microarray analysis reveals an important role for caspase-1 in dengue virus-induced p53-mediated apoptosis.	-
RABGAP1	23637	16112753	DENV2	ECV304	Microarray	Dengue infected ECV304 endothelial-like cells vs unifected cells	down	Microarray and real-time RT-PCR analyses of a novel set of differentially expressed human genes in ECV304 endothelial-like cells infected with dengue virus type 2.	-
RASGRP3	25780	19382257	DENV1	p53-deficient H1299	Microarray	Dengue infected p53-knockin cell line, H273 vs uninfected cell line	up	Gene expression profiling by microarray analysis reveals an important role for caspase-1 in dengue virus-induced p53-mediated apoptosis.	-
RBCK1	10616	19382257	DENV1	p53-deficient H1299	Microarray	Dengue infected p53-knockin cell line, H273 vs uninfected cell line	up	Gene expression profiling by microarray analysis reveals an important role for caspase-1 in dengue virus-induced p53-mediated apoptosis.	-
REC8	9985	19382257	DENV1	p53-deficient H1299	Microarray	Dengue infected p53-knockin cell line, H273 vs uninfected cell line	up	Gene expression profiling by microarray analysis reveals an important role for caspase-1 in dengue virus-induced p53-mediated apoptosis.	-
RGS2	5997	14557666	DENV2	HUVEC	Microarray	Dengue infected HUVECs vs uninfected cells	up	Dengue virus induces novel changes in gene expression of human umbilical vein endothelial cells.	-
RIPK3	11035	16112753	DENV2	ECV304	Microarray	Dengue infected ECV304 endothelial-like cells vs unifected cells	up	Microarray and real-time RT-PCR analyses of a novel set of differentially expressed human genes in ECV304 endothelial-like cells infected with dengue virus type 2.	-
RPL27A	6157	16112753	DENV2	ECV304	Microarray	Dengue infected ECV304 endothelial-like cells vs unifected cells	down	Microarray and real-time RT-PCR analyses of a novel set of differentially expressed human genes in ECV304 endothelial-like cells infected with dengue virus type 2.	-
RPS6	6194	19855901	DENV2	HepG2 cells	Microarray, qPCR	Dengue infected HepG2 cells 6hr vs 0hr	up	Dengue virus-induced regulation of the host cell translational machinery.	-
RPS6KB1	6198	19855901	DENV2	HepG2 cells	Microarray, qPCR	Dengue infected HepG2 cells 6hr vs 0hr	up	Dengue virus-induced regulation of the host cell translational machinery.	-
RRNAD1	51093	16112753	DENV2	ECV304	Microarray	Dengue infected ECV304 endothelial-like cells vs unifected cells	down	Microarray and real-time RT-PCR analyses of a novel set of differentially expressed human genes in ECV304 endothelial-like cells infected with dengue virus type 2.	-
RUNX3	864	16112753	DENV2	ECV304	Microarray	Dengue infected ECV304 endothelial-like cells vs unifected cells	down	Microarray and real-time RT-PCR analyses of a novel set of differentially expressed human genes in ECV304 endothelial-like cells infected with dengue virus type 2.	-
SAMD9	54809	19382257	DENV1	p53-deficient H1299	Microarray	Dengue infected p53-knockin cell line, H273 vs uninfected cell line	up	Gene expression profiling by microarray analysis reveals an important role for caspase-1 in dengue virus-induced p53-mediated apoptosis.	-
SAMHD1	25939	19382257	DENV1	p53-deficient H1299	Microarray	Dengue infected p53-knockin cell line, H273 vs uninfected cell line	up	Gene expression profiling by microarray analysis reveals an important role for caspase-1 in dengue virus-induced p53-mediated apoptosis.	-
SAR1B	51128	16112753	DENV2	ECV304	Microarray	Dengue infected ECV304 endothelial-like cells vs unifected cells	down	Microarray and real-time RT-PCR analyses of a novel set of differentially expressed human genes in ECV304 endothelial-like cells infected with dengue virus type 2.	-
SCNN1G	6340	16112753	DENV2	ECV304	Microarray	Dengue infected ECV304 endothelial-like cells vs unifected cells	down	Microarray and real-time RT-PCR analyses of a novel set of differentially expressed human genes in ECV304 endothelial-like cells infected with dengue virus type 2.	-
SCO2	9997	19382257	DENV1	p53-deficient H1299	Microarray	Dengue infected p53-knockin cell line, H273 vs uninfected cell line	up	Gene expression profiling by microarray analysis reveals an important role for caspase-1 in dengue virus-induced p53-mediated apoptosis.	-
SEC23A	10484	16112753	DENV2	ECV304	Microarray	Dengue infected ECV304 endothelial-like cells vs unifected cells	down	Microarray and real-time RT-PCR analyses of a novel set of differentially expressed human genes in ECV304 endothelial-like cells infected with dengue virus type 2.	-
SECTM1	6398	18444802	DF and DHF	Patient Blood	Microarray	patients with dengue fever (DF) in acute phase vs convalescent phase	up	Differences in global gene expression in peripheral blood mononuclear cells indicate a significant role of the innate responses in progression of dengue fever but not dengue hemorrhagic fever.	-
SELE	6401	18455750	DENV2	THP1	Microarray	THP1 cells infected with NO-resistance viruses (isolated from DHF patients) vs uninfected cells	up	Clinical isolates of dengue virus with distinctive susceptibility to nitric oxide radical induce differential gene responses in THP-1 cells.	-
SELL	6402	18455750	DENV2	THP1	Microarray	THP1 cells infected with NO-sensitive viruses (isolated from DF patients) vs uninfected cells	down	Clinical isolates of dengue virus with distinctive susceptibility to nitric oxide radical induce differential gene responses in THP-1 cells.	-
SELL	6402	18455750	DENV2	THP1	Microarray	THP1 cells infected with NO-resistance viruses (isolated from DHF patients) vs uninfected cells	up	Clinical isolates of dengue virus with distinctive susceptibility to nitric oxide radical induce differential gene responses in THP-1 cells.	-
SEMA3C	10512	19382257	DENV1	p53-deficient H1299	Microarray	Dengue infected p53-deficient cell line H1299 vs uninfected cell line	up	Gene expression profiling by microarray analysis reveals an important role for caspase-1 in dengue virus-induced p53-mediated apoptosis.	-
SERPING1	710	18444802	DF and DHF	Patient Blood	Microarray	patients with dengue fever (DF) in acute phase vs convalescent phase	up	Differences in global gene expression in peripheral blood mononuclear cells indicate a significant role of the innate responses in progression of dengue fever but not dengue hemorrhagic fever.	-
SFTPD	6441	16112753	DENV2	ECV304	Microarray	Dengue infected ECV304 endothelial-like cells vs unifected cells	down	Microarray and real-time RT-PCR analyses of a novel set of differentially expressed human genes in ECV304 endothelial-like cells infected with dengue virus type 2.	-
SKAP1	8631	18444802	DF and DHF	Patient Blood	Microarray	patients with dengue fever (DHF) in acute phase vs convalescent phase	up	Differences in global gene expression in peripheral blood mononuclear cells indicate a significant role of the innate responses in progression of dengue fever but not dengue hemorrhagic fever.	-
SLC16A6	9120	16112753	DENV2	ECV304	Microarray	Dengue infected ECV304 endothelial-like cells vs unifected cells	up	Microarray and real-time RT-PCR analyses of a novel set of differentially expressed human genes in ECV304 endothelial-like cells infected with dengue virus type 2.	-
SLC25A12	8604	16112753	DENV2	ECV304	Microarray	Dengue infected ECV304 endothelial-like cells vs unifected cells	down	Microarray and real-time RT-PCR analyses of a novel set of differentially expressed human genes in ECV304 endothelial-like cells infected with dengue virus type 2.	-
SLC25A28	81894	19382257	DENV1	p53-deficient H1299	Microarray	Dengue infected p53-knockin cell line, H273 vs uninfected cell line	up	Gene expression profiling by microarray analysis reveals an important role for caspase-1 in dengue virus-induced p53-mediated apoptosis.	-
SLC39A6	25800	16112753	DENV2	ECV304	Microarray	Dengue infected ECV304 endothelial-like cells vs unifected cells	down	Microarray and real-time RT-PCR analyses of a novel set of differentially expressed human genes in ECV304 endothelial-like cells infected with dengue virus type 2.	-
SLC9A3	6550	16112753	DENV2	ECV304	Microarray	Dengue infected ECV304 endothelial-like cells vs unifected cells	up	Microarray and real-time RT-PCR analyses of a novel set of differentially expressed human genes in ECV304 endothelial-like cells infected with dengue virus type 2.	-
SLCO1B1	10599	16112753	DENV2	ECV304	Microarray	Dengue infected ECV304 endothelial-like cells vs unifected cells	down	Microarray and real-time RT-PCR analyses of a novel set of differentially expressed human genes in ECV304 endothelial-like cells infected with dengue virus type 2.	-
SLPI	6590	18455750	DENV2	THP1	Microarray	THP1 cells infected with NO-resistance viruses (isolated from DHF patients) vs uninfected cells	up	Clinical isolates of dengue virus with distinctive susceptibility to nitric oxide radical induce differential gene responses in THP-1 cells.	-
SMARCA4	6597	19382257	DENV1	p53-deficient H1299	Microarray	Dengue infected p53-deficient cell line H1299 vs uninfected cell line	up	Gene expression profiling by microarray analysis reveals an important role for caspase-1 in dengue virus-induced p53-mediated apoptosis.	-
SMARCA5	8467	19382257	DENV1	p53-deficient H1299	Microarray	Dengue infected p53-knockin cell line, H273 vs uninfected cell line	up	Gene expression profiling by microarray analysis reveals an important role for caspase-1 in dengue virus-induced p53-mediated apoptosis.	-
SMC2	10592	16112753	DENV2	ECV304	Microarray	Dengue infected ECV304 endothelial-like cells vs unifected cells	down	Microarray and real-time RT-PCR analyses of a novel set of differentially expressed human genes in ECV304 endothelial-like cells infected with dengue virus type 2.	-
SP100	6672	19382257	DENV1	p53-deficient H1299	Microarray	Dengue infected p53-deficient cell line H1299 vs uninfected cell line	up	Gene expression profiling by microarray analysis reveals an important role for caspase-1 in dengue virus-induced p53-mediated apoptosis.	-
SP100	6672	19382257	DENV1	p53-deficient H1299	Microarray	Dengue infected p53-knockin cell line, H273 vs uninfected cell line	up	Gene expression profiling by microarray analysis reveals an important role for caspase-1 in dengue virus-induced p53-mediated apoptosis.	-
SP110	3431	19382257	DENV1	p53-deficient H1299	Microarray	Dengue infected p53-deficient cell line H1299 vs uninfected cell line	up	Gene expression profiling by microarray analysis reveals an important role for caspase-1 in dengue virus-induced p53-mediated apoptosis.	-
SP110	3431	19382257	DENV1	p53-deficient H1299	Microarray	Dengue infected p53-knockin cell line, H273 vs uninfected cell line	up	Gene expression profiling by microarray analysis reveals an important role for caspase-1 in dengue virus-induced p53-mediated apoptosis.	-
SPATS2L	26010	19382257	DENV1	p53-deficient H1299	Microarray	Dengue infected p53-knockin cell line, H273 vs uninfected cell line	up	Gene expression profiling by microarray analysis reveals an important role for caspase-1 in dengue virus-induced p53-mediated apoptosis.	-
SPP1	6696	16112753	DENV2	ECV304	Microarray	Dengue infected ECV304 endothelial-like cells vs unifected cells	down	Microarray and real-time RT-PCR analyses of a novel set of differentially expressed human genes in ECV304 endothelial-like cells infected with dengue virus type 2.	-
SPP1	6696	15584975	DENV2	Human monocyte derived macrophages	Microarray	Dengue infected Human monocyte derived macrophages 6hr vs Dengue uninfected cells	up	Gene Expression in Human Macrophages Infected with Dengue Virus Serotype-2	-
SS18	6760	16112753	DENV2	ECV304	Microarray	Dengue infected ECV304 endothelial-like cells vs unifected cells	down	Microarray and real-time RT-PCR analyses of a novel set of differentially expressed human genes in ECV304 endothelial-like cells infected with dengue virus type 2.	-
ST6GALNAC2	10610	16112753	DENV2	ECV304	Microarray	Dengue infected ECV304 endothelial-like cells vs unifected cells	down	Microarray and real-time RT-PCR analyses of a novel set of differentially expressed human genes in ECV304 endothelial-like cells infected with dengue virus type 2.	-
STAT1	6772	19382257	DENV1	p53-deficient H1299	Microarray	Dengue infected p53-deficient cell line H1299 vs uninfected cell line	up	Gene expression profiling by microarray analysis reveals an important role for caspase-1 in dengue virus-induced p53-mediated apoptosis.	-
STAT1	6772	19382257	DENV1	p53-deficient H1299	Microarray	Dengue infected p53-knockin cell line, H273 vs uninfected cell line	up	Gene expression profiling by microarray analysis reveals an important role for caspase-1 in dengue virus-induced p53-mediated apoptosis.	-
STAT2	6773	19382257	DENV1	p53-deficient H1299	Microarray	Dengue infected p53-deficient cell line H1299 vs uninfected cell line	up	Gene expression profiling by microarray analysis reveals an important role for caspase-1 in dengue virus-induced p53-mediated apoptosis.	-
STAT2	6773	19382257	DENV1	p53-deficient H1299	Microarray	Dengue infected p53-knockin cell line, H273 vs uninfected cell line	up	Gene expression profiling by microarray analysis reveals an important role for caspase-1 in dengue virus-induced p53-mediated apoptosis.	-
STAT2	6773	18455750	DENV2	THP1	Microarray	THP1 cells infected with NO-sensitive viruses (isolated from DF patients) vs uninfected cells	down	Clinical isolates of dengue virus with distinctive susceptibility to nitric oxide radical induce differential gene responses in THP-1 cells.	-
STAT2	6773	18455750	DENV2	THP1	Microarray	THP1 cells infected with NO-resistance viruses (isolated from DHF patients) vs uninfected cells	up	Clinical isolates of dengue virus with distinctive susceptibility to nitric oxide radical induce differential gene responses in THP-1 cells.	-
STAT6	6778	18455750	DENV2	THP1	Microarray	THP1 cells infected with NO-sensitive viruses (isolated from DF patients) vs uninfected cells	down	Clinical isolates of dengue virus with distinctive susceptibility to nitric oxide radical induce differential gene responses in THP-1 cells.	-
SYT1	6857	16112753	DENV2	ECV304	Microarray	Dengue infected ECV304 endothelial-like cells vs unifected cells	down	Microarray and real-time RT-PCR analyses of a novel set of differentially expressed human genes in ECV304 endothelial-like cells infected with dengue virus type 2.	-
TAP1	6890	19382257	DENV1	p53-deficient H1299	Microarray	Dengue infected p53-deficient cell line H1299 vs uninfected cell line	up	Gene expression profiling by microarray analysis reveals an important role for caspase-1 in dengue virus-induced p53-mediated apoptosis.	-
TAP1	6890	19382257	DENV1	p53-deficient H1299	Microarray	Dengue infected p53-knockin cell line, H273 vs uninfected cell line	up	Gene expression profiling by microarray analysis reveals an important role for caspase-1 in dengue virus-induced p53-mediated apoptosis.	-
TAP2	6891	19382257	DENV1	p53-deficient H1299	Microarray	Dengue infected p53-knockin cell line, H273 vs uninfected cell line	up	Gene expression profiling by microarray analysis reveals an important role for caspase-1 in dengue virus-induced p53-mediated apoptosis.	-
TFPI2	7980	19382257	DENV1	p53-deficient H1299	Microarray	Dengue infected p53-deficient cell line H1299 vs uninfected cell line	up	Gene expression profiling by microarray analysis reveals an important role for caspase-1 in dengue virus-induced p53-mediated apoptosis.	-
TGFA	7039	19382257	DENV1	p53-deficient H1299	Microarray	Dengue infected p53-deficient cell line H1299 vs uninfected cell line	up	Gene expression profiling by microarray analysis reveals an important role for caspase-1 in dengue virus-induced p53-mediated apoptosis.	-
TGFB2	7042	19382257	DENV1	p53-deficient H1299	Microarray	Dengue infected p53-deficient cell line H1299 vs uninfected cell line	up	Gene expression profiling by microarray analysis reveals an important role for caspase-1 in dengue virus-induced p53-mediated apoptosis.	-
TGFBR3	7049	18455750	DENV2	THP1	Microarray	THP1 cells infected with NO-sensitive viruses (isolated from DF patients) vs uninfected cells	down	Clinical isolates of dengue virus with distinctive susceptibility to nitric oxide radical induce differential gene responses in THP-1 cells.	-
THEMIS2	9473	19382257	DENV1	p53-deficient H1299	Microarray	Dengue infected p53-knockin cell line, H273 vs uninfected cell line	up	Gene expression profiling by microarray analysis reveals an important role for caspase-1 in dengue virus-induced p53-mediated apoptosis.	-
TIMP1	7076	15584975	DENV2	Human monocyte derived macrophages	Microarray	Dengue infected Human monocyte derived macrophages 24hr vs Dengue uninfected cells	up	Gene Expression in Human Macrophages Infected with Dengue Virus Serotype-2	-
TLR3	7098	19837110	DENV2	HepG2 cells	Microarray, Real time PCR	Dengue infected HepG2 cells vs uninfected cells	up	Gene expression analysis during dengue virus infection in HepG2 cells reveals virus control of innate immune response.	-
TLR3	7098	14557666	DENV2	HUVEC	Microarray	Dengue infected HUVECs vs uninfected cells	up	Dengue virus induces novel changes in gene expression of human umbilical vein endothelial cells.	-
TLR3	7098	19382257	DENV1	p53-deficient H1299	Microarray	Dengue infected p53-deficient cell line H1299 vs uninfected cell line	up	Gene expression profiling by microarray analysis reveals an important role for caspase-1 in dengue virus-induced p53-mediated apoptosis.	-
TLR3	7098	19382257	DENV1	p53-deficient H1299	Microarray	Dengue infected p53-knockin cell line, H273 vs uninfected cell line	up	Gene expression profiling by microarray analysis reveals an important role for caspase-1 in dengue virus-induced p53-mediated apoptosis.	-
TLR8	51311	19837110	DENV2	HepG2 cells	Microarray, Real time PCR	Dengue infected HepG2 cells vs uninfected cells	up	Gene expression analysis during dengue virus infection in HepG2 cells reveals virus control of innate immune response.	-
TMEM140	55281	19382257	DENV1	p53-deficient H1299	Microarray	Dengue infected p53-knockin cell line, H273 vs uninfected cell line	up	Gene expression profiling by microarray analysis reveals an important role for caspase-1 in dengue virus-induced p53-mediated apoptosis.	-
TNF	7124	14557666	DENV2	HUVEC	Microarray	Dengue infected HUVECs vs uninfected cells	up	Dengue virus induces novel changes in gene expression of human umbilical vein endothelial cells.	-
TNFRSF12A	51330	16112753	DENV2	ECV304	Microarray	Dengue infected ECV304 endothelial-like cells vs unifected cells	down	Microarray and real-time RT-PCR analyses of a novel set of differentially expressed human genes in ECV304 endothelial-like cells infected with dengue virus type 2.	-
TNFRSF17	608	18444802	DF and DHF	Patient Blood	Microarray	patients with dengue fever (DF) in acute phase vs convalescent phase	up	Differences in global gene expression in peripheral blood mononuclear cells indicate a significant role of the innate responses in progression of dengue fever but not dengue hemorrhagic fever.	-
TNFRSF8	943	18455750	DENV2	THP1	Microarray	THP1 cells infected with NO-resistance viruses (isolated from DHF patients) vs uninfected cells	down	Clinical isolates of dengue virus with distinctive susceptibility to nitric oxide radical induce differential gene responses in THP-1 cells.	-
TNFSF10	8743	19551822	DENV2	Human primary B cells	Microarray, qRT-PCR	Dengue infected Human primary B cells	up	Gene expression profiling of dengue infected human primary cells identifies secreted mediators in vivo.	-
TNFSF10	8743	19551822	DENV2	Human primary dendritic cells	Microarray, qRT-PCR	Dengue infected Human primary dendritic cells	up	Gene expression profiling of dengue infected human primary cells identifies secreted mediators in vivo.	-
TNFSF10	8743	19551822	DENV2	Human primary monocytes	Microarray, qRT-PCR	Dengue infected Human primary monocytes	up	Gene expression profiling of dengue infected human primary cells identifies secreted mediators in vivo.	-
TNFSF10	8743	19382257	DENV1	p53-deficient H1299	Microarray	Dengue infected p53-knockin cell line, H273 vs uninfected cell line	up	Gene expression profiling by microarray analysis reveals an important role for caspase-1 in dengue virus-induced p53-mediated apoptosis.	-
TNFSF8	944	15584975	DENV2	Human monocyte derived macrophages	Microarray	Dengue infected Human monocyte derived macrophages 24hr vs Dengue uninfected cells	down	Gene Expression in Human Macrophages Infected with Dengue Virus Serotype-2	-
TPX2	22974	19382257	DENV1	p53-deficient H1299	Microarray	Dengue infected p53-deficient cell line H1299 vs uninfected cell line	up	Gene expression profiling by microarray analysis reveals an important role for caspase-1 in dengue virus-induced p53-mediated apoptosis.	-
TRAIP	10293	16112753	DENV2	ECV304	Microarray	Dengue infected ECV304 endothelial-like cells vs unifected cells	down	Microarray and real-time RT-PCR analyses of a novel set of differentially expressed human genes in ECV304 endothelial-like cells infected with dengue virus type 2.	-
TRG	6965	18444802	DF and DHF	Patient Blood	Microarray	patients with dengue fever (DHF) in acute phase vs convalescent phase	up	Differences in global gene expression in peripheral blood mononuclear cells indicate a significant role of the innate responses in progression of dengue fever but not dengue hemorrhagic fever.	-
TRHR	7201	16112753	DENV2	ECV304	Microarray	Dengue infected ECV304 endothelial-like cells vs unifected cells	down	Microarray and real-time RT-PCR analyses of a novel set of differentially expressed human genes in ECV304 endothelial-like cells infected with dengue virus type 2.	-
TRIM14	9830	19382257	DENV1	p53-deficient H1299	Microarray	Dengue infected p53-deficient cell line H1299 vs uninfected cell line	up	Gene expression profiling by microarray analysis reveals an important role for caspase-1 in dengue virus-induced p53-mediated apoptosis.	-
TRIM14	9830	19382257	DENV1	p53-deficient H1299	Microarray	Dengue infected p53-knockin cell line, H273 vs uninfected cell line	up	Gene expression profiling by microarray analysis reveals an important role for caspase-1 in dengue virus-induced p53-mediated apoptosis.	-
TRIM21	6737	19382257	DENV1	p53-deficient H1299	Microarray	Dengue infected p53-deficient cell line H1299 vs uninfected cell line	up	Gene expression profiling by microarray analysis reveals an important role for caspase-1 in dengue virus-induced p53-mediated apoptosis.	-
TRIM21	6737	19382257	DENV1	p53-deficient H1299	Microarray	Dengue infected p53-knockin cell line, H273 vs uninfected cell line	up	Gene expression profiling by microarray analysis reveals an important role for caspase-1 in dengue virus-induced p53-mediated apoptosis.	-
TRIM25	7706	19382257	DENV1	p53-deficient H1299	Microarray	Dengue infected p53-deficient cell line H1299 vs uninfected cell line	up	Gene expression profiling by microarray analysis reveals an important role for caspase-1 in dengue virus-induced p53-mediated apoptosis.	-
TRIM25	7706	19382257	DENV1	p53-deficient H1299	Microarray	Dengue infected p53-knockin cell line, H273 vs uninfected cell line	up	Gene expression profiling by microarray analysis reveals an important role for caspase-1 in dengue virus-induced p53-mediated apoptosis.	-
TRIM26	7726	19382257	DENV1	p53-deficient H1299	Microarray	Dengue infected p53-knockin cell line, H273 vs uninfected cell line	up	Gene expression profiling by microarray analysis reveals an important role for caspase-1 in dengue virus-induced p53-mediated apoptosis.	-
TRIM34	53840	19382257	DENV1	p53-deficient H1299	Microarray	Dengue infected p53-knockin cell line, H273 vs uninfected cell line	up	Gene expression profiling by microarray analysis reveals an important role for caspase-1 in dengue virus-induced p53-mediated apoptosis.	-
TRIM38	10475	19382257	DENV1	p53-deficient H1299	Microarray	Dengue infected p53-deficient cell line H1299 vs uninfected cell line	up	Gene expression profiling by microarray analysis reveals an important role for caspase-1 in dengue virus-induced p53-mediated apoptosis.	-
TRIM38	10475	19382257	DENV1	p53-deficient H1299	Microarray	Dengue infected p53-knockin cell line, H273 vs uninfected cell line	up	Gene expression profiling by microarray analysis reveals an important role for caspase-1 in dengue virus-induced p53-mediated apoptosis.	-
TRIM5	85363	19382257	DENV1	p53-deficient H1299	Microarray	Dengue infected p53-deficient cell line H1299 vs uninfected cell line	up	Gene expression profiling by microarray analysis reveals an important role for caspase-1 in dengue virus-induced p53-mediated apoptosis.	-
TRIM5	85363	19382257	DENV1	p53-deficient H1299	Microarray	Dengue infected p53-knockin cell line, H273 vs uninfected cell line	up	Gene expression profiling by microarray analysis reveals an important role for caspase-1 in dengue virus-induced p53-mediated apoptosis.	-
TSHB	7252	16112753	DENV2	ECV304	Microarray	Dengue infected ECV304 endothelial-like cells vs unifected cells	down	Microarray and real-time RT-PCR analyses of a novel set of differentially expressed human genes in ECV304 endothelial-like cells infected with dengue virus type 2.	-
UBAP1	51271	16112753	DENV2	ECV304	Microarray	Dengue infected ECV304 endothelial-like cells vs unifected cells	down	Microarray and real-time RT-PCR analyses of a novel set of differentially expressed human genes in ECV304 endothelial-like cells infected with dengue virus type 2.	-
UBE2L6	9246	19382257	DENV1	p53-deficient H1299	Microarray	Dengue infected p53-deficient cell line H1299 vs uninfected cell line	up	Gene expression profiling by microarray analysis reveals an important role for caspase-1 in dengue virus-induced p53-mediated apoptosis.	-
UBE2L6	9246	19382257	DENV1	p53-deficient H1299	Microarray	Dengue infected p53-knockin cell line, H273 vs uninfected cell line	up	Gene expression profiling by microarray analysis reveals an important role for caspase-1 in dengue virus-induced p53-mediated apoptosis.	-
UQCRH	7388	16112753	DENV2	ECV304	Microarray	Dengue infected ECV304 endothelial-like cells vs unifected cells	up	Microarray and real-time RT-PCR analyses of a novel set of differentially expressed human genes in ECV304 endothelial-like cells infected with dengue virus type 2.	-
USP18	11274	19382257	DENV1	p53-deficient H1299	Microarray	Dengue infected p53-deficient cell line H1299 vs uninfected cell line	up	Gene expression profiling by microarray analysis reveals an important role for caspase-1 in dengue virus-induced p53-mediated apoptosis.	-
USP18	11274	19382257	DENV1	p53-deficient H1299	Microarray	Dengue infected p53-knockin cell line, H273 vs uninfected cell line	up	Gene expression profiling by microarray analysis reveals an important role for caspase-1 in dengue virus-induced p53-mediated apoptosis.	-
USP7	7874	16112753	DENV2	ECV304	Microarray	Dengue infected ECV304 endothelial-like cells vs unifected cells	down	Microarray and real-time RT-PCR analyses of a novel set of differentially expressed human genes in ECV304 endothelial-like cells infected with dengue virus type 2.	-
VEZF1	7716	16112753	DENV2	ECV304	Microarray	Dengue infected ECV304 endothelial-like cells vs unifected cells	down	Microarray and real-time RT-PCR analyses of a novel set of differentially expressed human genes in ECV304 endothelial-like cells infected with dengue virus type 2.	-
WNT2B	7482	16112753	DENV2	ECV304	Microarray	Dengue infected ECV304 endothelial-like cells vs unifected cells	down	Microarray and real-time RT-PCR analyses of a novel set of differentially expressed human genes in ECV304 endothelial-like cells infected with dengue virus type 2.	-
XBP1	7494	18444802	DF and DHF	Patient Blood	Microarray	patients with dengue fever (DF) in acute phase vs convalescent phase	up	Differences in global gene expression in peripheral blood mononuclear cells indicate a significant role of the innate responses in progression of dengue fever but not dengue hemorrhagic fever.	-
XCL1	6375	18444802	DF and DHF	Patient Blood	Microarray	patients with dengue fever (DHF) in acute phase vs convalescent phase	up	Differences in global gene expression in peripheral blood mononuclear cells indicate a significant role of the innate responses in progression of dengue fever but not dengue hemorrhagic fever.	-
ZAP70	7535	18444802	DF and DHF	Patient Blood	Microarray	patients with dengue fever (DHF) in acute phase vs convalescent phase	up	Differences in global gene expression in peripheral blood mononuclear cells indicate a significant role of the innate responses in progression of dengue fever but not dengue hemorrhagic fever.	-
ZC3HAV1	56829	19382257	DENV1	p53-deficient H1299	Microarray	Dengue infected p53-knockin cell line, H273 vs uninfected cell line	up	Gene expression profiling by microarray analysis reveals an important role for caspase-1 in dengue virus-induced p53-mediated apoptosis.	-
ZCCHC2	54877	19382257	DENV1	p53-deficient H1299	Microarray	Dengue infected p53-knockin cell line, H273 vs uninfected cell line	up	Gene expression profiling by microarray analysis reveals an important role for caspase-1 in dengue virus-induced p53-mediated apoptosis.	-
ZFPM2	23414	19382257	DENV1	p53-deficient H1299	Microarray	Dengue infected p53-deficient cell line H1299 vs uninfected cell line	up	Gene expression profiling by microarray analysis reveals an important role for caspase-1 in dengue virus-induced p53-mediated apoptosis.	-
ZFPM2	23414	19382257	DENV1	p53-deficient H1299	Microarray	Dengue infected p53-knockin cell line, H273 vs uninfected cell line	up	Gene expression profiling by microarray analysis reveals an important role for caspase-1 in dengue virus-induced p53-mediated apoptosis.	-
ZNF112	7771	16112753	DENV2	ECV304	Microarray	Dengue infected ECV304 endothelial-like cells vs unifected cells	down	Microarray and real-time RT-PCR analyses of a novel set of differentially expressed human genes in ECV304 endothelial-like cells infected with dengue virus type 2.	-
ZNF73	7624	16112753	DENV2	ECV304	Microarray	Dengue infected ECV304 endothelial-like cells vs unifected cells	down	Microarray and real-time RT-PCR analyses of a novel set of differentially expressed human genes in ECV304 endothelial-like cells infected with dengue virus type 2.	-
ABCA1	19	19138155	DF, DHFII, DHFIII, DHFIV	Patient Blood	Microarray	uncomplicated dengue day 4 vs autologous convalescent samples day 30	up	Patterns of Gene Transcript Abundance in the Blood of Children with Severe or Uncomplicated Dengue Highlight Differences in Disease Evolution and Host Response to Dengue Virus Infection	GSE13052
ABTB2	25841	19138155	DF, DHFII, DHFIII, DHFIV	Patient Blood	Microarray	uncomplicated dengue day 4 vs dengue shock syndrome day 4_x000D_	up	Patterns of Gene Transcript Abundance in the Blood of Children with Severe or Uncomplicated Dengue Highlight Differences in Disease Evolution and Host Response to Dengue Virus Infection	GSE13052
ACOX2	8309	19138155	DF, DHFII, DHFIII, DHFIV	Patient Blood	Microarray	dengue shock syndrome (DSS) day 4 vs autologous convalescent samples day 30	up	Patterns of Gene Transcript Abundance in the Blood of Children with Severe or Uncomplicated Dengue Highlight Differences in Disease Evolution and Host Response to Dengue Virus Infection	GSE13052
ADO	84890	19138155	DF, DHFII, DHFIII, DHFIV	Patient Blood	Microarray	uncomplicated dengue day 4 vs autologous convalescent samples day 30	up	Patterns of Gene Transcript Abundance in the Blood of Children with Severe or Uncomplicated Dengue Highlight Differences in Disease Evolution and Host Response to Dengue Virus Infection	GSE13052
AKAP7	9465	19138155	DF, DHFII, DHFIII, DHFIV	Patient Blood	Microarray	uncomplicated dengue day 4 vs dengue shock syndrome day 4_x000D_	up	Patterns of Gene Transcript Abundance in the Blood of Children with Severe or Uncomplicated Dengue Highlight Differences in Disease Evolution and Host Response to Dengue Virus Infection	GSE13052
ALDH1A1	216	19138155	DF, DHFII, DHFIII, DHFIV	Patient Blood	Microarray	uncomplicated dengue day 4 vs dengue shock syndrome day 4_x000D_	up	Patterns of Gene Transcript Abundance in the Blood of Children with Severe or Uncomplicated Dengue Highlight Differences in Disease Evolution and Host Response to Dengue Virus Infection	GSE13052
ALG14	199857	19138155	DF, DHFII, DHFIII, DHFIV	Patient Blood	Microarray	dengue shock syndrome (DSS) day 4 vs autologous convalescent samples day 30	up	Patterns of Gene Transcript Abundance in the Blood of Children with Severe or Uncomplicated Dengue Highlight Differences in Disease Evolution and Host Response to Dengue Virus Infection	GSE13052
ALPL	249	19138155	DF, DHFII, DHFIII, DHFIV	Patient Blood	Microarray	uncomplicated dengue day 4 vs autologous convalescent samples day 30	down	Patterns of Gene Transcript Abundance in the Blood of Children with Severe or Uncomplicated Dengue Highlight Differences in Disease Evolution and Host Response to Dengue Virus Infection	GSE13052
ALPL	249	19138155	DF, DHFII, DHFIII, DHFIV	Patient Blood	Microarray	uncomplicated dengue day 4 vs dengue shock syndrome day 4_x000D_	down	Patterns of Gene Transcript Abundance in the Blood of Children with Severe or Uncomplicated Dengue Highlight Differences in Disease Evolution and Host Response to Dengue Virus Infection	GSE13052
ANKRD22	118932	19138155	DF, DHFII, DHFIII, DHFIV	Patient Blood	Microarray	uncomplicated dengue day 4 vs dengue shock syndrome day 4_x000D_	up	Patterns of Gene Transcript Abundance in the Blood of Children with Severe or Uncomplicated Dengue Highlight Differences in Disease Evolution and Host Response to Dengue Virus Infection	GSE13052
ANKRD22	118932	19138155	DF, DHFII, DHFIII, DHFIV	Patient Blood	Microarray	uncomplicated dengue day 4 vs autologous convalescent samples day 30	up	Patterns of Gene Transcript Abundance in the Blood of Children with Severe or Uncomplicated Dengue Highlight Differences in Disease Evolution and Host Response to Dengue Virus Infection	GSE13052
AQP3	360	19138155	DF, DHFII, DHFIII, DHFIV	Patient Blood	Microarray	dengue shock syndrome (DSS) day 4 vs autologous convalescent samples day 30	up	Patterns of Gene Transcript Abundance in the Blood of Children with Severe or Uncomplicated Dengue Highlight Differences in Disease Evolution and Host Response to Dengue Virus Infection	GSE13052
ARL6IP6	151188	19138155	DF, DHFII, DHFIII, DHFIV	Patient Blood	Microarray	uncomplicated dengue day 4 vs dengue shock syndrome day 4_x000D_	up	Patterns of Gene Transcript Abundance in the Blood of Children with Severe or Uncomplicated Dengue Highlight Differences in Disease Evolution and Host Response to Dengue Virus Infection	GSE13052
ASAP1-IT1	29065	19138155	DF, DHFII, DHFIII, DHFIV	Patient Blood	Microarray	dengue shock syndrome (DSS) day 4 vs autologous convalescent samples day 30	up	Patterns of Gene Transcript Abundance in the Blood of Children with Severe or Uncomplicated Dengue Highlight Differences in Disease Evolution and Host Response to Dengue Virus Infection	GSE13052
[truncated: 5,562 more rows]
