# Supplementary material for: DenHunt - A Comprehensive Database of the Intricate Network of Dengue-Human Interactions
Source: PLoS Negl Trop Dis. 2016 Sep 12;10(9):e0004965. doi: 10.1371/journal.pntd.0004965 (PMC5019383; doi:10.1371/journal.pntd.0004965)
Supplement: S3 Dataset — All the human proteins that physically interact with 3 and more viral components are listed in this table. (XLSX) [file pntd.0004965.s006.xlsx]

## Sheet: Readme
		S3 Dataset:	Human proteins that interact with 3 and more viral components. All the human proteins that physically interact with 3 and more viral components are listed in this table.
		Column headers
		Dengue viral component	The Dengue viral protein or RNA
		Human Gene symbol	The Human gene symbol interacting with the Dengue protein
		Human Gene name	The Human gene name interacting with the Dengue protein
		Human Entrez Id	The Human gene Entrez id interacting with the Dengue protein
		Pubmed Id	The Pubmed id of the paper from where this intersction has been extracted
		Serotype of the DENV strain used	Serotype of the DENV strain used in the paper
		System	What type of Cell line, patient used
		Experiment	What experiments was used to detect the interaction
		Title of the paper	Title of the paper
		Kegg Pathway of the Human gene	Kegg Pathway of the Human protein
		No of dengue viral component interactors for the Human protein	No of dengue viral component interactors for the Human protein

## Sheet: hum-prot-more-3-viral-prot
Dengue viral component	Human Gene symbol	Human Gene name	Human Entrez Id	Pubmed Id	Serotype od the DENV strain used	System	Experiment	Title of the paper	Kegg Pathway of the Human gene	No of dengue viral component interactors for the Human protein
C	UBE2I	ubiquitin-conjugating enzyme E2I (UBC9 homolog, yeast)	7329	21358811	DENV2	insilico	Computational analysis	Mapping protein interactions between Dengue virus and its human and insect hosts.	hsa04064 [Pathway Title: NF-kappa B signaling pathway]; hsa03013 [Pathway Title: RNA transport]; hsa05206 [Pathway Title: MicroRNAs in cancer]; hsa04120 [Pathway Title: Ubiquitin mediated proteolysis]	7
E	UBE2I	ubiquitin-conjugating enzyme E2I (UBC9 homolog, yeast)	7329	17265167	DENV2	Yeast, BHK-21, 293	Y2H assay, Co-immunoprecipitation, site directed mutagenesis	The type 2 dengue virus envelope protein interacts with small ubiquitin-like modifier-1 (SUMO-1) conjugating enzyme 9 (Ubc9).	hsa04064 [Pathway Title: NF-kappa B signaling pathway]; hsa03013 [Pathway Title: RNA transport]; hsa05206 [Pathway Title: MicroRNAs in cancer]; hsa04120 [Pathway Title: Ubiquitin mediated proteolysis]	7
NS2A	UBE2I	ubiquitin-conjugating enzyme E2I (UBC9 homolog, yeast)	7329	21358811	DENV2	insilico	Computational analysis	Mapping protein interactions between Dengue virus and its human and insect hosts.	hsa04064 [Pathway Title: NF-kappa B signaling pathway]; hsa03013 [Pathway Title: RNA transport]; hsa05206 [Pathway Title: MicroRNAs in cancer]; hsa04120 [Pathway Title: Ubiquitin mediated proteolysis]	7
NS2B	UBE2I	ubiquitin-conjugating enzyme E2I (UBC9 homolog, yeast)	7329	21911577	DENV2	Yeast	Y2H assay	A physical interaction network of dengue virus and human proteins.	hsa04064 [Pathway Title: NF-kappa B signaling pathway]; hsa03013 [Pathway Title: RNA transport]; hsa05206 [Pathway Title: MicroRNAs in cancer]; hsa04120 [Pathway Title: Ubiquitin mediated proteolysis]	7
NS3	UBE2I	ubiquitin-conjugating enzyme E2I (UBC9 homolog, yeast)	7329	21358811	DENV2	insilico	Computational analysis	Mapping protein interactions between Dengue virus and its human and insect hosts.	hsa04064 [Pathway Title: NF-kappa B signaling pathway]; hsa03013 [Pathway Title: RNA transport]; hsa05206 [Pathway Title: MicroRNAs in cancer]; hsa04120 [Pathway Title: Ubiquitin mediated proteolysis]	7
NS4B	UBE2I	ubiquitin-conjugating enzyme E2I (UBC9 homolog, yeast)	7329	21358811	DENV2	insilico	Computational analysis	Mapping protein interactions between Dengue virus and its human and insect hosts.	hsa04064 [Pathway Title: NF-kappa B signaling pathway]; hsa03013 [Pathway Title: RNA transport]; hsa05206 [Pathway Title: MicroRNAs in cancer]; hsa04120 [Pathway Title: Ubiquitin mediated proteolysis]	7
NS4B	UBE2I	ubiquitin-conjugating enzyme E2I (UBC9 homolog, yeast)	7329	21911577	DENV2	Yeast	Y2H assay	A physical interaction network of dengue virus and human proteins.	hsa04064 [Pathway Title: NF-kappa B signaling pathway]; hsa03013 [Pathway Title: RNA transport]; hsa05206 [Pathway Title: MicroRNAs in cancer]; hsa04120 [Pathway Title: Ubiquitin mediated proteolysis]	7
NS5	UBE2I	ubiquitin-conjugating enzyme E2I (UBC9 homolog, yeast)	7329	21911577	DENV2	Yeast	Y2H assay	A physical interaction network of dengue virus and human proteins.	hsa04064 [Pathway Title: NF-kappa B signaling pathway]; hsa03013 [Pathway Title: RNA transport]; hsa05206 [Pathway Title: MicroRNAs in cancer]; hsa04120 [Pathway Title: Ubiquitin mediated proteolysis]	7
C	CSNK2A1	casein kinase 2, alpha 1 polypeptide pseudogene; casein kinase 2, alpha 1 polypeptide	1457	21358811	DENV2	insilico	Computational analysis	Mapping protein interactions between Dengue virus and its human and insect hosts.	hsa04064 [Pathway Title: NF-kappa B signaling pathway]; hsa03008 [Pathway Title: Ribosome biogenesis in eukaryotes]; hsa05168 [Pathway Title: Herpes simplex infection]; hsa04520 [Pathway Title: Adherens junction]; hsa04530 [Pathway Title: Tight junction]; hsa05169 [Pathway Title: Epstein-Barr virus infection]; hsa04310 [Pathway Title: Wnt signaling pathway]; hsa05162 [Pathway Title: Measles]	6
E	CSNK2A1	casein kinase 2, alpha 1 polypeptide pseudogene; casein kinase 2, alpha 1 polypeptide	1457	21358811	DENV2	insilico	Computational analysis	Mapping protein interactions between Dengue virus and its human and insect hosts.	hsa04064 [Pathway Title: NF-kappa B signaling pathway]; hsa03008 [Pathway Title: Ribosome biogenesis in eukaryotes]; hsa05168 [Pathway Title: Herpes simplex infection]; hsa04520 [Pathway Title: Adherens junction]; hsa04530 [Pathway Title: Tight junction]; hsa05169 [Pathway Title: Epstein-Barr virus infection]; hsa04310 [Pathway Title: Wnt signaling pathway]; hsa05162 [Pathway Title: Measles]	6
NS1	CSNK2A1	casein kinase 2, alpha 1 polypeptide pseudogene; casein kinase 2, alpha 1 polypeptide	1457	21358811	DENV2	insilico	Computational analysis	Mapping protein interactions between Dengue virus and its human and insect hosts.	hsa04064 [Pathway Title: NF-kappa B signaling pathway]; hsa03008 [Pathway Title: Ribosome biogenesis in eukaryotes]; hsa05168 [Pathway Title: Herpes simplex infection]; hsa04520 [Pathway Title: Adherens junction]; hsa04530 [Pathway Title: Tight junction]; hsa05169 [Pathway Title: Epstein-Barr virus infection]; hsa04310 [Pathway Title: Wnt signaling pathway]; hsa05162 [Pathway Title: Measles]	6
NS2A	CSNK2A1	casein kinase 2, alpha 1 polypeptide pseudogene; casein kinase 2, alpha 1 polypeptide	1457	21358811	DENV2	insilico	Computational analysis	Mapping protein interactions between Dengue virus and its human and insect hosts.	hsa04064 [Pathway Title: NF-kappa B signaling pathway]; hsa03008 [Pathway Title: Ribosome biogenesis in eukaryotes]; hsa05168 [Pathway Title: Herpes simplex infection]; hsa04520 [Pathway Title: Adherens junction]; hsa04530 [Pathway Title: Tight junction]; hsa05169 [Pathway Title: Epstein-Barr virus infection]; hsa04310 [Pathway Title: Wnt signaling pathway]; hsa05162 [Pathway Title: Measles]	6
NS3	CSNK2A1	casein kinase 2, alpha 1 polypeptide pseudogene; casein kinase 2, alpha 1 polypeptide	1457	21358811	DENV2	insilico	Computational analysis	Mapping protein interactions between Dengue virus and its human and insect hosts.	hsa04064 [Pathway Title: NF-kappa B signaling pathway]; hsa03008 [Pathway Title: Ribosome biogenesis in eukaryotes]; hsa05168 [Pathway Title: Herpes simplex infection]; hsa04520 [Pathway Title: Adherens junction]; hsa04530 [Pathway Title: Tight junction]; hsa05169 [Pathway Title: Epstein-Barr virus infection]; hsa04310 [Pathway Title: Wnt signaling pathway]; hsa05162 [Pathway Title: Measles]	6
NS4B	CSNK2A1	casein kinase 2, alpha 1 polypeptide pseudogene; casein kinase 2, alpha 1 polypeptide	1457	21358811	DENV2	insilico	Computational analysis	Mapping protein interactions between Dengue virus and its human and insect hosts.	hsa04064 [Pathway Title: NF-kappa B signaling pathway]; hsa03008 [Pathway Title: Ribosome biogenesis in eukaryotes]; hsa05168 [Pathway Title: Herpes simplex infection]; hsa04520 [Pathway Title: Adherens junction]; hsa04530 [Pathway Title: Tight junction]; hsa05169 [Pathway Title: Epstein-Barr virus infection]; hsa04310 [Pathway Title: Wnt signaling pathway]; hsa05162 [Pathway Title: Measles]	6
C	GAB1	GRB2-associated binding protein 1	2549	21358811	DENV2	insilico	Computational analysis	Mapping protein interactions between Dengue virus and its human and insect hosts.	hsa04012 [Pathway Title: ErbB signaling pathway]; hsa04014 [Pathway Title: Ras signaling pathway]; hsa04722 [Pathway Title: Neurotrophin signaling pathway]; hsa05205 [Pathway Title: Proteoglycans in cancer]; hsa05211 [Pathway Title: Renal cell carcinoma]; hsa05100 [Pathway Title: Bacterial invasion of epithelial cells]	5
E	GAB1	GRB2-associated binding protein 1	2549	21358811	DENV2	insilico	Computational analysis	Mapping protein interactions between Dengue virus and its human and insect hosts.	hsa04012 [Pathway Title: ErbB signaling pathway]; hsa04014 [Pathway Title: Ras signaling pathway]; hsa04722 [Pathway Title: Neurotrophin signaling pathway]; hsa05205 [Pathway Title: Proteoglycans in cancer]; hsa05211 [Pathway Title: Renal cell carcinoma]; hsa05100 [Pathway Title: Bacterial invasion of epithelial cells]	5
NS1	GAB1	GRB2-associated binding protein 1	2549	21358811	DENV2	insilico	Computational analysis	Mapping protein interactions between Dengue virus and its human and insect hosts.	hsa04012 [Pathway Title: ErbB signaling pathway]; hsa04014 [Pathway Title: Ras signaling pathway]; hsa04722 [Pathway Title: Neurotrophin signaling pathway]; hsa05205 [Pathway Title: Proteoglycans in cancer]; hsa05211 [Pathway Title: Renal cell carcinoma]; hsa05100 [Pathway Title: Bacterial invasion of epithelial cells]	5
NS4A	GAB1	GRB2-associated binding protein 1	2549	21358811	DENV2	insilico	Computational analysis	Mapping protein interactions between Dengue virus and its human and insect hosts.	hsa04012 [Pathway Title: ErbB signaling pathway]; hsa04014 [Pathway Title: Ras signaling pathway]; hsa04722 [Pathway Title: Neurotrophin signaling pathway]; hsa05205 [Pathway Title: Proteoglycans in cancer]; hsa05211 [Pathway Title: Renal cell carcinoma]; hsa05100 [Pathway Title: Bacterial invasion of epithelial cells]	5
NS4B	GAB1	GRB2-associated binding protein 1	2549	21358811	DENV2	insilico	Computational analysis	Mapping protein interactions between Dengue virus and its human and insect hosts.	hsa04012 [Pathway Title: ErbB signaling pathway]; hsa04014 [Pathway Title: Ras signaling pathway]; hsa04722 [Pathway Title: Neurotrophin signaling pathway]; hsa05205 [Pathway Title: Proteoglycans in cancer]; hsa05211 [Pathway Title: Renal cell carcinoma]; hsa05100 [Pathway Title: Bacterial invasion of epithelial cells]	5
NS2A	IKBKE	inhibitor of kappa light polypeptide gene enhancer in B-cells, kinase epsilon	9641	25968648	DENV1, DENV2, DENV4	293T	Luciferase reporter assays, Western blot	Dengue Virus NS Proteins Inhibit RIG-I/MAVS Signaling by Blocking TBK1/IRF3 Phosphorylation: Dengue Virus Serotype 1 NS4A Is a Unique Interferon-Regulating Virulence Determinant	hsa05162 [Pathway Title: Measles]; hsa05164 [Pathway Title: Influenza A]; hsa04620 [Pathway Title: Toll-like receptor signaling pathway]; hsa05161 [Pathway Title: Hepatitis B]; hsa04623 [Pathway Title: Cytosolic DNA-sensing pathway]; hsa05160 [Pathway Title: Hepatitis C]; hsa05168 [Pathway Title: Herpes simplex infection]; hsa04622 [Pathway Title: RIG-I-like receptor signaling pathway]	5
NS2B	IKBKE	inhibitor of kappa light polypeptide gene enhancer in B-cells, kinase epsilon	9641	24173023	DENV2	293	Co-immunoprecipitation, Co-localization by Immunofluorescence staining, Computational analysis	Dengue virus subverts the interferon induction pathway via NS2B/3 protease-I?B kinase epsilon interaction.	hsa05162 [Pathway Title: Measles]; hsa05164 [Pathway Title: Influenza A]; hsa04620 [Pathway Title: Toll-like receptor signaling pathway]; hsa05161 [Pathway Title: Hepatitis B]; hsa04623 [Pathway Title: Cytosolic DNA-sensing pathway]; hsa05160 [Pathway Title: Hepatitis C]; hsa05168 [Pathway Title: Herpes simplex infection]; hsa04622 [Pathway Title: RIG-I-like receptor signaling pathway]	5
NS3	IKBKE	inhibitor of kappa light polypeptide gene enhancer in B-cells, kinase epsilon	9641	24173023	DENV2	293	Co-immunoprecipitation, Co-localization by Immunofluorescence staining, Computational analysis	Dengue virus subverts the interferon induction pathway via NS2B/3 protease-I?B kinase epsilon interaction.	hsa05162 [Pathway Title: Measles]; hsa05164 [Pathway Title: Influenza A]; hsa04620 [Pathway Title: Toll-like receptor signaling pathway]; hsa05161 [Pathway Title: Hepatitis B]; hsa04623 [Pathway Title: Cytosolic DNA-sensing pathway]; hsa05160 [Pathway Title: Hepatitis C]; hsa05168 [Pathway Title: Herpes simplex infection]; hsa04622 [Pathway Title: RIG-I-like receptor signaling pathway]	5
NS4A	IKBKE	inhibitor of kappa light polypeptide gene enhancer in B-cells, kinase epsilon	9641	25968648	DENV1	293T	Luciferase reporter assays, Western blot	Dengue Virus NS Proteins Inhibit RIG-I/MAVS Signaling by Blocking TBK1/IRF3 Phosphorylation: Dengue Virus Serotype 1 NS4A Is a Unique Interferon-Regulating Virulence Determinant	hsa05162 [Pathway Title: Measles]; hsa05164 [Pathway Title: Influenza A]; hsa04620 [Pathway Title: Toll-like receptor signaling pathway]; hsa05161 [Pathway Title: Hepatitis B]; hsa04623 [Pathway Title: Cytosolic DNA-sensing pathway]; hsa05160 [Pathway Title: Hepatitis C]; hsa05168 [Pathway Title: Herpes simplex infection]; hsa04622 [Pathway Title: RIG-I-like receptor signaling pathway]	5
NS4B	IKBKE	inhibitor of kappa light polypeptide gene enhancer in B-cells, kinase epsilon	9641	25968648	DENV1, DENV2, DENV4	293T	Luciferase reporter assays, Western blot	Dengue Virus NS Proteins Inhibit RIG-I/MAVS Signaling by Blocking TBK1/IRF3 Phosphorylation: Dengue Virus Serotype 1 NS4A Is a Unique Interferon-Regulating Virulence Determinant	hsa05162 [Pathway Title: Measles]; hsa05164 [Pathway Title: Influenza A]; hsa04620 [Pathway Title: Toll-like receptor signaling pathway]; hsa05161 [Pathway Title: Hepatitis B]; hsa04623 [Pathway Title: Cytosolic DNA-sensing pathway]; hsa05160 [Pathway Title: Hepatitis C]; hsa05168 [Pathway Title: Herpes simplex infection]; hsa04622 [Pathway Title: RIG-I-like receptor signaling pathway]	5
3'-UTR	PTBP1	polypyrimidine tract binding protein 1	5725	19380576	DENV2	BHK-21, Vero	RNA immunoprecipitation followed by mass spectrometry, Confocal immunofluorescence analysis, siRNA,	The polypyrimidine tract-binding protein is required for efficient dengue virus propagation and associates with the viral replication machinery.	-	5
3'-UTR	PTBP1	polypyrimidine tract binding protein 1	5725	21148275	DENV2	A549	RNA immunoprecipitation followed by mass spectrometry, Confocal immunofluorescence analysis	Functional interaction between cellular p100 and the dengue virus 3' UTR.	-	5
5'-UTR	PTBP1	polypyrimidine tract binding protein 1	5725	19380576	DENV2	BHK-21, Vero	RNA immunoprecipitation followed by mass spectrometry, Confocal immunofluorescence analysis, siRNA,	The polypyrimidine tract-binding protein is required for efficient dengue virus propagation and associates with the viral replication machinery.	-	5
NS1	PTBP1	polypyrimidine tract binding protein 1	5725	21911577	DENV2	Yeast	Y2H assay	A physical interaction network of dengue virus and human proteins.	-	5
NS3	PTBP1	polypyrimidine tract binding protein 1	5725	21911577	DENV2	Yeast	Y2H assay	A physical interaction network of dengue virus and human proteins.	-	5
NS4A	PTBP1	polypyrimidine tract binding protein 1	5725	19380576	DENV2	BHK-21, Vero	RNA immunoprecipitation followed by mass spectrometry, Confocal immunofluorescence analysis, siRNA,	The polypyrimidine tract-binding protein is required for efficient dengue virus propagation and associates with the viral replication machinery.	-	5
NS4A	PTBP1	polypyrimidine tract binding protein 1	5725	19450550	DENV2	Huh-7	Y2H assay, siRNA, Co-immunopreipitation	Polypyrimidine tract-binding protein influences negative strand RNA synthesis of dengue virus.	-	5
C	AFTPH	aftiphilin	54812	21358811	DENV2	insilico	Computational analysis	Mapping protein interactions between Dengue virus and its human and insect hosts.	-	4
E	AFTPH	aftiphilin	54812	21358811	DENV2	insilico	Computational analysis	Mapping protein interactions between Dengue virus and its human and insect hosts.	-	4
NS2A	AFTPH	aftiphilin	54812	21358811	DENV2	insilico	Computational analysis	Mapping protein interactions between Dengue virus and its human and insect hosts.	-	4
NS4B	AFTPH	aftiphilin	54812	21358811	DENV2	insilico	Computational analysis	Mapping protein interactions between Dengue virus and its human and insect hosts.	-	4
NS2A	DDX5	DEAD (Asp-Glu-Ala-Asp) box polypeptide 5	1655	21911577	DENV2	Yeast	Y2H assay	A physical interaction network of dengue virus and human proteins.	hsa05202 [Pathway Title: Transcriptional misregulation in cancer]; hsa03040 [Pathway Title: Spliceosome]; hsa05205 [Pathway Title: Proteoglycans in cancer]	4
NS2B	DDX5	DEAD (Asp-Glu-Ala-Asp) box polypeptide 5	1655	21911577	DENV2	Yeast	Y2H assay	A physical interaction network of dengue virus and human proteins.	hsa05202 [Pathway Title: Transcriptional misregulation in cancer]; hsa03040 [Pathway Title: Spliceosome]; hsa05205 [Pathway Title: Proteoglycans in cancer]	4
NS3	DDX5	DEAD (Asp-Glu-Ala-Asp) box polypeptide 5	1655	21911577	DENV2	Yeast	Y2H assay	A physical interaction network of dengue virus and human proteins.	hsa05202 [Pathway Title: Transcriptional misregulation in cancer]; hsa03040 [Pathway Title: Spliceosome]; hsa05205 [Pathway Title: Proteoglycans in cancer]	4
NS5	DDX5	DEAD (Asp-Glu-Ala-Asp) box polypeptide 5	1655	21911577	DENV2	Yeast	Y2H assay	A physical interaction network of dengue virus and human proteins.	hsa05202 [Pathway Title: Transcriptional misregulation in cancer]; hsa03040 [Pathway Title: Spliceosome]; hsa05205 [Pathway Title: Proteoglycans in cancer]	4
3'-UTR	MAVS	mitochondrial antiviral signaling protein	57506	26138103	DENV2	Huh7	RNA-immunoprecipitation followed by mass spectrometry	Dengue subgenomic RNA binds TRIM25 to inhibit interferon expression for epidemiological fitness	hsa04623 [Pathway Title: Cytosolic DNA-sensing pathway]; hsa05160 [Pathway Title: Hepatitis C]; hsa04622 [Pathway Title: RIG-I-like receptor signaling pathway]; hsa05164 [Pathway Title: Influenza A]; hsa05161 [Pathway Title: Hepatitis B]; hsa05162 [Pathway Title: Measles]; hsa05168 [Pathway Title: Herpes simplex infection]	4
NS2A	MAVS	mitochondrial antiviral signaling protein	57506	25968648	DENV1, DENV2, DENV4	293T	Luciferase reporter assays, Western blot	Dengue Virus NS Proteins Inhibit RIG-I/MAVS Signaling by Blocking TBK1/IRF3 Phosphorylation: Dengue Virus Serotype 1 NS4A Is a Unique Interferon-Regulating Virulence Determinant	hsa04623 [Pathway Title: Cytosolic DNA-sensing pathway]; hsa05160 [Pathway Title: Hepatitis C]; hsa04622 [Pathway Title: RIG-I-like receptor signaling pathway]; hsa05164 [Pathway Title: Influenza A]; hsa05161 [Pathway Title: Hepatitis B]; hsa05162 [Pathway Title: Measles]; hsa05168 [Pathway Title: Herpes simplex infection]	4
NS4A	MAVS	mitochondrial antiviral signaling protein	57506	25968648	DENV1	293T	Luciferase reporter assays, Western blot	Dengue Virus NS Proteins Inhibit RIG-I/MAVS Signaling by Blocking TBK1/IRF3 Phosphorylation: Dengue Virus Serotype 1 NS4A Is a Unique Interferon-Regulating Virulence Determinant	hsa04623 [Pathway Title: Cytosolic DNA-sensing pathway]; hsa05160 [Pathway Title: Hepatitis C]; hsa04622 [Pathway Title: RIG-I-like receptor signaling pathway]; hsa05164 [Pathway Title: Influenza A]; hsa05161 [Pathway Title: Hepatitis B]; hsa05162 [Pathway Title: Measles]; hsa05168 [Pathway Title: Herpes simplex infection]	4
NS4B	MAVS	mitochondrial antiviral signaling protein	57506	25968648	DENV1, DENV2, DENV4	293T	Luciferase reporter assays, Western blot	Dengue Virus NS Proteins Inhibit RIG-I/MAVS Signaling by Blocking TBK1/IRF3 Phosphorylation: Dengue Virus Serotype 1 NS4A Is a Unique Interferon-Regulating Virulence Determinant	hsa04623 [Pathway Title: Cytosolic DNA-sensing pathway]; hsa05160 [Pathway Title: Hepatitis C]; hsa04622 [Pathway Title: RIG-I-like receptor signaling pathway]; hsa05164 [Pathway Title: Influenza A]; hsa05161 [Pathway Title: Hepatitis B]; hsa05162 [Pathway Title: Measles]; hsa05168 [Pathway Title: Herpes simplex infection]	4
C	PLG	plasminogen	5340	21669186		HepG2	qRT-PCR, FACS	Role of CD137 signaling in dengue virus-mediated apoptosis	hsa04080 [Pathway Title: Neuroactive ligand-receptor interaction]; hsa05150 [Pathway Title: Staphylococcus aureus infection]; hsa04610 [Pathway Title: Complement and coagulation cascades]; hsa05164 [Pathway Title: Influenza A]	4
E	PLG	plasminogen	5340	21281507	DENV2	Bacteria	Bacterial two hybrid assay	Dengue-2 structural proteins associate with human proteins to produce a coagulation and innate immune response biased interactome.	hsa04080 [Pathway Title: Neuroactive ligand-receptor interaction]; hsa05150 [Pathway Title: Staphylococcus aureus infection]; hsa04610 [Pathway Title: Complement and coagulation cascades]; hsa05164 [Pathway Title: Influenza A]	4
E	PLG	plasminogen	5340	11129636	DENV1, DENV2, DENV3, DENV4	Cell free assays	Fibrin/Fibrinolysis assays, Fibrinogen/Fibrinolysis assays, Binding assays	Participation of the Dengue Virus in the Fibrinolytic Process	hsa04080 [Pathway Title: Neuroactive ligand-receptor interaction]; hsa05150 [Pathway Title: Staphylococcus aureus infection]; hsa04610 [Pathway Title: Complement and coagulation cascades]; hsa05164 [Pathway Title: Influenza A]	4
M	PLG	plasminogen	5340	21281507	DENV2	Bacteria	Bacterial two hybrid assay	Dengue-2 structural proteins associate with human proteins to produce a coagulation and innate immune response biased interactome.	hsa04080 [Pathway Title: Neuroactive ligand-receptor interaction]; hsa05150 [Pathway Title: Staphylococcus aureus infection]; hsa04610 [Pathway Title: Complement and coagulation cascades]; hsa05164 [Pathway Title: Influenza A]	4
NS1	PLG	plasminogen	5340	23516407	DENV2	Yeast	Y2H assay	Mapping the interactions of dengue virus NS1 protein with human liver proteins using a yeast two-hybrid system: identification of C1q as an interacting partner.	hsa04080 [Pathway Title: Neuroactive ligand-receptor interaction]; hsa05150 [Pathway Title: Staphylococcus aureus infection]; hsa04610 [Pathway Title: Complement and coagulation cascades]; hsa05164 [Pathway Title: Influenza A]	4
C	ZAP70	zeta-chain (TCR) associated protein kinase 70kDa	7535	21358811	DENV2	insilico	Computational analysis	Mapping protein interactions between Dengue virus and its human and insect hosts.	hsa04650 [Pathway Title: Natural killer cell mediated cytotoxicity]; hsa05340 [Pathway Title: Primary immunodeficiency]; hsa04660 [Pathway Title: T cell receptor signaling pathway]; hsa04014 [Pathway Title: Ras signaling pathway]; hsa04064 [Pathway Title: NF-kappa B signaling pathway]	4
E	ZAP70	zeta-chain (TCR) associated protein kinase 70kDa	7535	21358811	DENV2	insilico	Computational analysis	Mapping protein interactions between Dengue virus and its human and insect hosts.	hsa04650 [Pathway Title: Natural killer cell mediated cytotoxicity]; hsa05340 [Pathway Title: Primary immunodeficiency]; hsa04660 [Pathway Title: T cell receptor signaling pathway]; hsa04014 [Pathway Title: Ras signaling pathway]; hsa04064 [Pathway Title: NF-kappa B signaling pathway]	4
NS4A	ZAP70	zeta-chain (TCR) associated protein kinase 70kDa	7535	21358811	DENV2	insilico	Computational analysis	Mapping protein interactions between Dengue virus and its human and insect hosts.	hsa04650 [Pathway Title: Natural killer cell mediated cytotoxicity]; hsa05340 [Pathway Title: Primary immunodeficiency]; hsa04660 [Pathway Title: T cell receptor signaling pathway]; hsa04014 [Pathway Title: Ras signaling pathway]; hsa04064 [Pathway Title: NF-kappa B signaling pathway]	4
NS4B	ZAP70	zeta-chain (TCR) associated protein kinase 70kDa	7535	21358811	DENV2	insilico	Computational analysis	Mapping protein interactions between Dengue virus and its human and insect hosts.	hsa04650 [Pathway Title: Natural killer cell mediated cytotoxicity]; hsa05340 [Pathway Title: Primary immunodeficiency]; hsa04660 [Pathway Title: T cell receptor signaling pathway]; hsa04014 [Pathway Title: Ras signaling pathway]; hsa04064 [Pathway Title: NF-kappa B signaling pathway]	4
NS1	AMER1	APC membrane recruitment protein 1	139285	21911577	DENV2	Yeast	Y2H assay	A physical interaction network of dengue virus and human proteins.	-	3
NS2A	AMER1	APC membrane recruitment protein 1	139285	21911577	DENV2	Yeast	Y2H assay	A physical interaction network of dengue virus and human proteins.	-	3
NS2B	AMER1	APC membrane recruitment protein 1	139285	21911577	DENV2	Yeast	Y2H assay	A physical interaction network of dengue virus and human proteins.	-	3
E	AP1M1	adaptor-related protein complex 1, mu 1 subunit	8907	21358811	DENV2	insilico	Computational analysis	Mapping protein interactions between Dengue virus and its human and insect hosts.	hsa04142 [Pathway Title: Lysosome]	3
NS2A	AP1M1	adaptor-related protein complex 1, mu 1 subunit	8907	21358811	DENV2	insilico	Computational analysis	Mapping protein interactions between Dengue virus and its human and insect hosts.	hsa04142 [Pathway Title: Lysosome]	3
NS4B	AP1M1	adaptor-related protein complex 1, mu 1 subunit	8907	21358811	DENV2	insilico	Computational analysis	Mapping protein interactions between Dengue virus and its human and insect hosts.	hsa04142 [Pathway Title: Lysosome]	3
3'-UTR	CALR	calreticulin	811	12584332	DENV4	U937	Crosslinking followed by immunoprecipitation and mobility shift assay	Cellular proteins from human monocytes bind to dengue 4 virus minus-strand 3' untranslated region RNA.	hsa04141 [Pathway Title: Protein processing in endoplasmic reticulum]; hsa04145 [Pathway Title: Phagosome]; hsa04612 [Pathway Title: Antigen processing and presentation]; hsa05142 [Pathway Title: Chagas disease (American trypanosomiasis)]; hsa05166 [Pathway Title: HTLV-I infection]	3
E	CALR	calreticulin	811	19105951	DENV2	Yeast, Vero	Y2H assay, Co-immunoprecipitation analysis, Co-localization analysis, siRNA	Interaction of dengue virus envelope protein with endoplasmic reticulum-resident chaperones facilitates dengue virus production.	hsa04141 [Pathway Title: Protein processing in endoplasmic reticulum]; hsa04145 [Pathway Title: Phagosome]; hsa04612 [Pathway Title: Antigen processing and presentation]; hsa05142 [Pathway Title: Chagas disease (American trypanosomiasis)]; hsa05166 [Pathway Title: HTLV-I infection]	3
NS5	CALR	calreticulin	811	21911577	DENV2	Yeast	Y2H assay	A physical interaction network of dengue virus and human proteins.	hsa04141 [Pathway Title: Protein processing in endoplasmic reticulum]; hsa04145 [Pathway Title: Phagosome]; hsa04612 [Pathway Title: Antigen processing and presentation]; hsa05142 [Pathway Title: Chagas disease (American trypanosomiasis)]; hsa05166 [Pathway Title: HTLV-I infection]	3
C	CLDN1	claudin 1	9076	19962368	DENV2	Yeast, Huh-7 cells	Y2H assay, Knock-down analysis, Co-immunoprecipitation	Novel binding between pre-membrane protein and claudin-1 is required for efficient dengue virus entry.	hsa05130 [Pathway Title: Pathogenic Escherichia coli infection]; hsa04514 [Pathway Title: Cell adhesion molecules (CAMs)]; hsa04670 [Pathway Title: Leukocyte transendothelial migration]; hsa04530 [Pathway Title: Tight junction]; hsa05160 [Pathway Title: Hepatitis C]	3
M	CLDN1	claudin 1	9076	24074594	DENV1, DENV2, DENV3, DENV4	Huh7.5	siRNA, Pull-down assay, Knock-down analysis	The interaction between claudin-1 and dengue viral prM/M protein for its entry.	hsa05130 [Pathway Title: Pathogenic Escherichia coli infection]; hsa04514 [Pathway Title: Cell adhesion molecules (CAMs)]; hsa04670 [Pathway Title: Leukocyte transendothelial migration]; hsa04530 [Pathway Title: Tight junction]; hsa05160 [Pathway Title: Hepatitis C]	3
prM	CLDN1	claudin 1	9076	19962368	DENV2	Yeast, Huh-7 cells	Y2H assay, Knock-down analysis, Co-immunoprecipitation	Novel binding between pre-membrane protein and claudin-1 is required for efficient dengue virus entry.	hsa05130 [Pathway Title: Pathogenic Escherichia coli infection]; hsa04514 [Pathway Title: Cell adhesion molecules (CAMs)]; hsa04670 [Pathway Title: Leukocyte transendothelial migration]; hsa04530 [Pathway Title: Tight junction]; hsa05160 [Pathway Title: Hepatitis C]	3
C	CLU	clusterin	1191	21281507	DENV2	Bacteria	Bacterial two hybrid assay	Dengue-2 structural proteins associate with human proteins to produce a coagulation and innate immune response biased interactome.	-	3
M	CLU	clusterin	1191	21281507	DENV2	Bacteria	Bacterial two hybrid assay	Dengue-2 structural proteins associate with human proteins to produce a coagulation and innate immune response biased interactome.	-	3
NS1	CLU	clusterin	1191	17825259	DENV2	Vero, 293T	Affinity purification followed by mass spectrometry	Secreted complement regulatory protein clusterin interacts with dengue virus nonstructural protein 1.	-	3
NS2A	DDX58	DEAD (Asp-Glu-Ala-Asp) box polypeptide 58	23586	25968648	DENV1, DENV2, DENV4	293T	Luciferase reporter assays, Western blot	Dengue Virus NS Proteins Inhibit RIG-I/MAVS Signaling by Blocking TBK1/IRF3 Phosphorylation: Dengue Virus Serotype 1 NS4A Is a Unique Interferon-Regulating Virulence Determinant	hsa04622 [Pathway Title: RIG-I-like receptor signaling pathway]; hsa05169 [Pathway Title: Epstein-Barr virus infection]; hsa05160 [Pathway Title: Hepatitis C]; hsa05168 [Pathway Title: Herpes simplex infection]; hsa05162 [Pathway Title: Measles]; hsa04623 [Pathway Title: Cytosolic DNA-sensing pathway]; hsa04064 [Pathway Title: NF-kappa B signaling pathway]; hsa05161 [Pathway Title: Hepatitis B]; …	3
NS4A	DDX58	DEAD (Asp-Glu-Ala-Asp) box polypeptide 58	23586	25968648	DENV1	293T	Luciferase reporter assays, Western blot	Dengue Virus NS Proteins Inhibit RIG-I/MAVS Signaling by Blocking TBK1/IRF3 Phosphorylation: Dengue Virus Serotype 1 NS4A Is a Unique Interferon-Regulating Virulence Determinant	hsa04622 [Pathway Title: RIG-I-like receptor signaling pathway]; hsa05169 [Pathway Title: Epstein-Barr virus infection]; hsa05160 [Pathway Title: Hepatitis C]; hsa05168 [Pathway Title: Herpes simplex infection]; hsa05162 [Pathway Title: Measles]; hsa04623 [Pathway Title: Cytosolic DNA-sensing pathway]; hsa04064 [Pathway Title: NF-kappa B signaling pathway]; hsa05161 [Pathway Title: Hepatitis B]; …	3
NS4B	DDX58	DEAD (Asp-Glu-Ala-Asp) box polypeptide 58	23586	25968648	DENV1, DENV2, DENV4	293T	Luciferase reporter assays, Western blot	Dengue Virus NS Proteins Inhibit RIG-I/MAVS Signaling by Blocking TBK1/IRF3 Phosphorylation: Dengue Virus Serotype 1 NS4A Is a Unique Interferon-Regulating Virulence Determinant	hsa04622 [Pathway Title: RIG-I-like receptor signaling pathway]; hsa05169 [Pathway Title: Epstein-Barr virus infection]; hsa05160 [Pathway Title: Hepatitis C]; hsa05168 [Pathway Title: Herpes simplex infection]; hsa05162 [Pathway Title: Measles]; hsa04623 [Pathway Title: Cytosolic DNA-sensing pathway]; hsa04064 [Pathway Title: NF-kappa B signaling pathway]; hsa05161 [Pathway Title: Hepatitis B]; …	3
NS2A	DST	dystonin	667	21911577	DENV2	Yeast	Y2H assay	A physical interaction network of dengue virus and human proteins.	-	3
NS2B	DST	dystonin	667	21911577	DENV2	Yeast	Y2H assay	A physical interaction network of dengue virus and human proteins.	-	3
NS5	DST	dystonin	667	21911577	DENV2	Yeast	Y2H assay	A physical interaction network of dengue virus and human proteins.	-	3
NS1	EIF4G2	eukaryotic translation initiation factor 4 gamma, 2	1982	21911577	DENV2	Yeast	Y2H assay	A physical interaction network of dengue virus and human proteins.	hsa05416 [Pathway Title: Viral myocarditis]; hsa03013 [Pathway Title: RNA transport]	3
NS3	EIF4G2	eukaryotic translation initiation factor 4 gamma, 2	1982	21911577	DENV2	Yeast	Y2H assay	A physical interaction network of dengue virus and human proteins.	hsa05416 [Pathway Title: Viral myocarditis]; hsa03013 [Pathway Title: RNA transport]	3
NS5	EIF4G2	eukaryotic translation initiation factor 4 gamma, 2	1982	24855065	DENV2	Vero, HepG2, 293	Isotopic Differentiation of Interactions as Random or Targeted (I-DIRT) Immunoaffinity Purification followed by Mass spectrometry	Quantitative proteomic analysis of host-virus interactions reveals a role for Golgi brefeldin A resistance factor 1(GBF1) in dengue infection.	hsa05416 [Pathway Title: Viral myocarditis]; hsa03013 [Pathway Title: RNA transport]	3
C	HBB	hemoglobin, beta	3043	23326450	DENV1, DENV2, DENV3, DENV4	Yeast	Y2H assay	Identification of new protein interactions between dengue fever virus and its hosts, human and mosquito.	hsa05144 [Pathway Title: Malaria]; hsa05143 [Pathway Title: African trypanosomiasis]	3
NS3	HBB	hemoglobin, beta	3043	23326450	DENV1, DENV2, DENV3, DENV4	Yeast	Y2H assay	Identification of new protein interactions between dengue fever virus and its hosts, human and mosquito.	hsa05144 [Pathway Title: Malaria]; hsa05143 [Pathway Title: African trypanosomiasis]	3
NS5	HBB	hemoglobin, beta	3043	23326450	DENV1, DENV2, DENV3, DENV4	Yeast	Y2H assay	Identification of new protein interactions between dengue fever virus and its hosts, human and mosquito.	hsa05144 [Pathway Title: Malaria]; hsa05143 [Pathway Title: African trypanosomiasis]	3
NS2A	IFIH1	interferon induced with helicase C domain 1	64135	25968648	DENV1, DENV2, DENV4	293T	Luciferase reporter assays, Western blot	Dengue Virus NS Proteins Inhibit RIG-I/MAVS Signaling by Blocking TBK1/IRF3 Phosphorylation: Dengue Virus Serotype 1 NS4A Is a Unique Interferon-Regulating Virulence Determinant	hsa05161 [Pathway Title: Hepatitis B]; hsa05164 [Pathway Title: Influenza A]; hsa05162 [Pathway Title: Measles]; hsa05168 [Pathway Title: Herpes simplex infection]; hsa04622 [Pathway Title: RIG-I-like receptor signaling pathway]	3
NS4A	IFIH1	interferon induced with helicase C domain 1	64135	25968648	DENV1	293T	Luciferase reporter assays, Western blot	Dengue Virus NS Proteins Inhibit RIG-I/MAVS Signaling by Blocking TBK1/IRF3 Phosphorylation: Dengue Virus Serotype 1 NS4A Is a Unique Interferon-Regulating Virulence Determinant	hsa05161 [Pathway Title: Hepatitis B]; hsa05164 [Pathway Title: Influenza A]; hsa05162 [Pathway Title: Measles]; hsa05168 [Pathway Title: Herpes simplex infection]; hsa04622 [Pathway Title: RIG-I-like receptor signaling pathway]	3
NS4B	IFIH1	interferon induced with helicase C domain 1	64135	25968648	DENV1, DENV2, DENV4	293T	Luciferase reporter assays, Western blot	Dengue Virus NS Proteins Inhibit RIG-I/MAVS Signaling by Blocking TBK1/IRF3 Phosphorylation: Dengue Virus Serotype 1 NS4A Is a Unique Interferon-Regulating Virulence Determinant	hsa05161 [Pathway Title: Hepatitis B]; hsa05164 [Pathway Title: Influenza A]; hsa05162 [Pathway Title: Measles]; hsa05168 [Pathway Title: Herpes simplex infection]; hsa04622 [Pathway Title: RIG-I-like receptor signaling pathway]	3
E	IRF3	interferon regulatory factor 3	3661	21358811	DENV2	insilico	Computational analysis	Mapping protein interactions between Dengue virus and its human and insect hosts.	hsa04620 [Pathway Title: Toll-like receptor signaling pathway]; hsa04622 [Pathway Title: RIG-I-like receptor signaling pathway]; hsa05161 [Pathway Title: Hepatitis B]; hsa05162 [Pathway Title: Measles]; hsa05203 [Pathway Title: Viral carcinogenesis]; hsa04623 [Pathway Title: Cytosolic DNA-sensing pathway]; hsa05164 [Pathway Title: Influenza A]; hsa05168 [Pathway Title: Herpes simplex infection]; …	3
NS2B	IRF3	interferon regulatory factor 3	3661	22761576	DENV2	293T/17, A549	Immunofluorescence microscopy, Western blot	Dengue virus targets the adaptor protein MITA to subvert host innate immunity.	hsa04620 [Pathway Title: Toll-like receptor signaling pathway]; hsa04622 [Pathway Title: RIG-I-like receptor signaling pathway]; hsa05161 [Pathway Title: Hepatitis B]; hsa05162 [Pathway Title: Measles]; hsa05203 [Pathway Title: Viral carcinogenesis]; hsa04623 [Pathway Title: Cytosolic DNA-sensing pathway]; hsa05164 [Pathway Title: Influenza A]; hsa05168 [Pathway Title: Herpes simplex infection]; …	3
NS3	IRF3	interferon regulatory factor 3	3661	22761576	DENV2	293T/17, A549	Immunofluorescence microscopy, Western blot	Dengue virus targets the adaptor protein MITA to subvert host innate immunity.	hsa04620 [Pathway Title: Toll-like receptor signaling pathway]; hsa04622 [Pathway Title: RIG-I-like receptor signaling pathway]; hsa05161 [Pathway Title: Hepatitis B]; hsa05162 [Pathway Title: Measles]; hsa05203 [Pathway Title: Viral carcinogenesis]; hsa04623 [Pathway Title: Cytosolic DNA-sensing pathway]; hsa05164 [Pathway Title: Influenza A]; hsa05168 [Pathway Title: Herpes simplex infection]; …	3
NS1	SERPIND1	serpin peptidase inhibitor, clade D (heparin cofactor), member 1	3053	21911577	DENV2	Yeast	Y2H assay	A physical interaction network of dengue virus and human proteins.	hsa04610 [Pathway Title: Complement and coagulation cascades]	3
NS2B	SERPIND1	serpin peptidase inhibitor, clade D (heparin cofactor), member 1	3053	21911577	DENV2	Yeast	Y2H assay	A physical interaction network of dengue virus and human proteins.	hsa04610 [Pathway Title: Complement and coagulation cascades]	3
NS3	SERPIND1	serpin peptidase inhibitor, clade D (heparin cofactor), member 1	3053	21911577	DENV2	Yeast	Y2H assay	A physical interaction network of dengue virus and human proteins.	hsa04610 [Pathway Title: Complement and coagulation cascades]	3
3'-UTR	SSB	Sjogren syndrome antigen B (autoantigen La)	6741	12584332	DENV4	U937	Crosslinking followed by immunoprecipitation and mobility shift assay	Cellular proteins from human monocytes bind to dengue 4 virus minus-strand 3' untranslated region RNA.	hsa05322 [Pathway Title: Systemic lupus erythematosus]	3
NS3	SSB	Sjogren syndrome antigen B (autoantigen La)	6741	15084396	DENV4	U937	UV-induced cross-linking assay	La protein binds to NS5 and NS3 and to the 5' and 3' ends of Dengue 4 virus RNA.	hsa05322 [Pathway Title: Systemic lupus erythematosus]	3
NS3	SSB	Sjogren syndrome antigen B (autoantigen La)	6741	22014111	DENV1	Yeast, 293	Y2H assay, Co-immunoprecipitation	Flavivirus NS3 and NS5 proteins interaction network: a high-throughput yeast two-hybrid screen.	hsa05322 [Pathway Title: Systemic lupus erythematosus]	3
NS5	SSB	Sjogren syndrome antigen B (autoantigen La)	6741	15084396	DENV4	U937	UV-induced cross-linking assay	La protein binds to NS5 and NS3 and to the 5' and 3' ends of Dengue 4 virus RNA.	hsa05322 [Pathway Title: Systemic lupus erythematosus]	3
NS5	SSB	Sjogren syndrome antigen B (autoantigen La)	6741	22014111	DENV1	Yeast, 293	Y2H assay, Co-immunoprecipitation	Flavivirus NS3 and NS5 proteins interaction network: a high-throughput yeast two-hybrid screen.	hsa05322 [Pathway Title: Systemic lupus erythematosus]	3
NS2A	TAZ	tafazzin	6901	21358811	DENV2	insilico	Computational analysis	Mapping protein interactions between Dengue virus and its human and insect hosts.	hsa00564 [Pathway Title: Glycerophospholipid metabolism]	3
NS3	TAZ	tafazzin	6901	26221025		293T	Pull down assay, Knock down analysis,	Dengue NS3, an RNAi suppressor, modulates the human-miRNA pathways through its interacting partner	hsa00564 [Pathway Title: Glycerophospholipid metabolism]	3
NS4B	TAZ	tafazzin	6901	21358811	DENV2	insilico	Computational analysis	Mapping protein interactions between Dengue virus and its human and insect hosts.	hsa00564 [Pathway Title: Glycerophospholipid metabolism]	3
NS2A	TBK1	TANK-binding kinase 1	29110	25968648	DENV1, DENV2, DENV4	293T	Luciferase reporter assays, Western blot	Dengue Virus NS Proteins Inhibit RIG-I/MAVS Signaling by Blocking TBK1/IRF3 Phosphorylation: Dengue Virus Serotype 1 NS4A Is a Unique Interferon-Regulating Virulence Determinant	hsa04622 [Pathway Title: RIG-I-like receptor signaling pathway]; hsa05162 [Pathway Title: Measles]; hsa05164 [Pathway Title: Influenza A]; hsa04623 [Pathway Title: Cytosolic DNA-sensing pathway]; hsa05168 [Pathway Title: Herpes simplex infection]; hsa05161 [Pathway Title: Hepatitis B]; hsa04014 [Pathway Title: Ras signaling pathway]; hsa04620 [Pathway Title: Toll-like receptor signaling pathway];…	3
NS4A	TBK1	TANK-binding kinase 1	29110	25968648	DENV1	293T	Luciferase reporter assays, Western blot	Dengue Virus NS Proteins Inhibit RIG-I/MAVS Signaling by Blocking TBK1/IRF3 Phosphorylation: Dengue Virus Serotype 1 NS4A Is a Unique Interferon-Regulating Virulence Determinant	hsa04622 [Pathway Title: RIG-I-like receptor signaling pathway]; hsa05162 [Pathway Title: Measles]; hsa05164 [Pathway Title: Influenza A]; hsa04623 [Pathway Title: Cytosolic DNA-sensing pathway]; hsa05168 [Pathway Title: Herpes simplex infection]; hsa05161 [Pathway Title: Hepatitis B]; hsa04014 [Pathway Title: Ras signaling pathway]; hsa04620 [Pathway Title: Toll-like receptor signaling pathway];…	3
NS4B	TBK1	TANK-binding kinase 1	29110	25968648	DENV1, DENV2, DENV4	293T	Luciferase reporter assays, Western blot	Dengue Virus NS Proteins Inhibit RIG-I/MAVS Signaling by Blocking TBK1/IRF3 Phosphorylation: Dengue Virus Serotype 1 NS4A Is a Unique Interferon-Regulating Virulence Determinant	hsa04622 [Pathway Title: RIG-I-like receptor signaling pathway]; hsa05162 [Pathway Title: Measles]; hsa05164 [Pathway Title: Influenza A]; hsa04623 [Pathway Title: Cytosolic DNA-sensing pathway]; hsa05168 [Pathway Title: Herpes simplex infection]; hsa05161 [Pathway Title: Hepatitis B]; hsa04014 [Pathway Title: Ras signaling pathway]; hsa04620 [Pathway Title: Toll-like receptor signaling pathway];…	3
C	TUBA1A	tubulin, alpha 1a	7846	21281507	DENV2	Bacteria	Bacterial two hybrid assay	Dengue-2 structural proteins associate with human proteins to produce a coagulation and innate immune response biased interactome.	hsa05130 [Pathway Title: Pathogenic Escherichia coli infection]; hsa04145 [Pathway Title: Phagosome]; hsa04540 [Pathway Title: Gap junction]	3
M	TUBA1A	tubulin, alpha 1a	7846	21281507	DENV2	Bacteria	Bacterial two hybrid assay	Dengue-2 structural proteins associate with human proteins to produce a coagulation and innate immune response biased interactome.	hsa05130 [Pathway Title: Pathogenic Escherichia coli infection]; hsa04145 [Pathway Title: Phagosome]; hsa04540 [Pathway Title: Gap junction]	3
NS1	TUBA1A	tubulin, alpha 1a	7846	26092250	DENV2	Huh7	Co-immunoprecipitation followed by Mass spectrometry	Dengue virus NS1 protein interacts with the ribosomal protein RPL18: This interaction is required for viraltranslation and replication in Huh-7 cells.	hsa05130 [Pathway Title: Pathogenic Escherichia coli infection]; hsa04145 [Pathway Title: Phagosome]; hsa04540 [Pathway Title: Gap junction]	3
