# Supplementary material for: DenHunt - A Comprehensive Database of the Intricate Network of Dengue-Human Interactions
Source: PLoS Negl Trop Dis. 2016 Sep 12;10(9):e0004965. doi: 10.1371/journal.pntd.0004965 (PMC5019383; doi:10.1371/journal.pntd.0004965)
Supplement: S6 Dataset — List of statistically significant non infectious disease KEGG pathways, which are caused by environmental and genetic factors, associated with dengue virus interacting proteins identified using Webgestalt. Only pathways that have 3 and more dengue virus interacting proteins and an adj p-value of ≤ 0.01 are selected. (XLSX) [file pntd.0004965.s009.xlsx]

## Sheet: Readme
		S6 Dataset:	Enriched non-infectious disease KEGG pathways associated with dengue virus interacting genes. List of statistically significant non infectious disease KEGG pathways, which are caused by environmental and genetic factors, associated with dengue virus interacting proteins identified using Webgestalt. Only pathways that have 3 and more dengue virus interacting proteins and an adj p-value of ≤ 0.01 a…
		Column headers
		Disease Category	The disease category as given in the KEGG pathway database.
		Pathway id	The KEGG pathway id
		Pathway name	The KEGG pathway name
		Statistical parameters	Statistical Parameters
		No of genes in pathway belonging to dengue interacting human gene category	No of genes in pathway belonging to dengue interacting human gene category
		Human Entrez Gene id	Entrez gene id of the Human protein
		Human Gene Symbol	Gene symbol of Human protein
		Human Gene name	Gene name of the Human protein
		Pathway detected by KEGG Mapper	The pathways that were detected only by KEGG Mapper are denoted as yes. All the other pathways are detected by both WebGestalt and KEGG Mapper.

## Sheet: Enriched-NonInfect-Diseases
	Non Infectious Disease Category
6. Human Diseases
	6.1 Cancers: Overview
		Pathway id	Pathway name	Statistical parameters	No of genes in pathway belonging to dengue interacting human gene category	Human Entrez Gene id	Human Gene Symbol	Human Gene name	Pathways identified by KEGG Mapper
		hsa05200	Pathways in cancer - Homo sapiens (human) (65)	C=326;O=65;E=7.60;R=7.77;rawP=1.29e-34;adjP=4.05e-33	65	1164	CKS2	CDC28 protein kinase regulatory subunit 2
						1499	CTNNB1	catenin (cadherin-associated protein), beta 1, 88kDa
						2034	EPAS1	endothelial PAS domain protein 1
						207	AKT1	v-akt murine thymoma viral oncogene homolog 1 (EC:2.7.11.1)
						2149	F2R	coagulation factor II (thrombin) receptor
						2271	FH	fumarate hydratase (EC:4.2.1.2)
						2335	FN1	fibronectin 1
						2353	FOS	FBJ murine osteosarcoma viral oncogene homolog
						23624	CBLC	Cbl proto-oncogene C, E3 ubiquitin protein ligase
						2475	MTOR	mechanistic target of rapamycin (serine/threonine kinase) (EC:2.7.11.1)
						2932	GSK3B	glycogen synthase kinase 3 beta (EC:2.7.11.1 2.7.11.26)
						3091	HIF1A	hypoxia inducible factor 1, alpha subunit (basic helix-loop-helix transcription factor)
						329	BIRC2	baculoviral IAP repeat containing 2
						330	BIRC3	baculoviral IAP repeat containing 3
						331	XIAP	X-linked inhibitor of apoptosis, E3 ubiquitin protein ligase
						332	BIRC5	baculoviral IAP repeat containing 5
						3320	HSP90AA1	heat shock protein 90kDa alpha (cytosolic), class A member 1
						3326	HSP90AB1	heat shock protein 90kDa alpha (cytosolic), class B member 1
						355	FAS	Fas cell surface death receptor
						356	FASLG	Fas ligand (TNF superfamily, member 6)
						3569	IL6	interleukin 6
						3576	CXCL8	chemokine (C-X-C motif) ligand 8
						3725	JUN	jun proto-oncogene
						3728	JUP	junction plakoglobin
						3912	LAMB1	laminin, beta 1
						405	ARNT	aryl hydrocarbon receptor nuclear translocator
						4313	MMP2	matrix metallopeptidase 2 (EC:3.4.24.24)
						4318	MMP9	matrix metallopeptidase 9 (EC:3.4.24.35)
						4790	NFKB1	nuclear factor of kappa light polypeptide gene enhancer in B-cells 1
						4791	NFKB2	nuclear factor of kappa light polypeptide gene enhancer in B-cells 2 (p49/p100)
						4792	NFKBIA	nuclear factor of kappa light polypeptide gene enhancer in B-cells inhibitor, alpha
						4843	NOS2	nitric oxide synthase 2, inducible (EC:1.14.13.39)
						5371	PML	promyelocytic leukemia
						5594	MAPK1	mitogen-activated protein kinase 1 (EC:2.7.11.24)
						5595	MAPK3	mitogen-activated protein kinase 3 (EC:2.7.11.24)
						5599	MAPK8	mitogen-activated protein kinase 8 (EC:2.7.11.24)
						5732	PTGER2	prostaglandin E receptor 2 (subtype EP2), 53kDa
						5734	PTGER4	prostaglandin E receptor 4 (subtype EP4)
						5743	PTGS2	prostaglandin-endoperoxide synthase 2 (prostaglandin G/H synthase and cyclooxygenase) (EC:1.14.99.1)
						581	BAX	BCL2-associated X protein
						5879	RAC1	ras-related C3 botulinum toxin substrate 1 (rho family, small GTP binding protein Rac1)
						596	BCL2	B-cell CLL/lymphoma 2
						5970	RELA	v-rel avian reticuloendotheliosis viral oncogene homolog A
						598	BCL2L1	BCL2-like 1
						6093	ROCK1	Rho-associated, coiled-coil containing protein kinase 1 (EC:2.7.11.1)
						6513	SLC2A1	solute carrier family 2 (facilitated glucose transporter), member 1
						6772	STAT1	signal transducer and activator of transcription 1, 91kDa
						6774	STAT3	signal transducer and activator of transcription 3 (acute-phase response factor)
						6934	TCF7L2	transcription factor 7-like 2 (T-cell specific, HMG-box)
						7157	TP53	tumor protein p53
						7184	HSP90B1	heat shock protein 90kDa beta (Grp94), member 1
						7422	VEGFA	vascular endothelial growth factor A
						7424	VEGFC	vascular endothelial growth factor C
						7852	CXCR4	chemokine (C-X-C motif) receptor 4
						8312	AXIN1	axin 1
						836	CASP3	caspase 3, apoptosis-related cysteine peptidase (EC:3.4.22.56)
						841	CASP8	caspase 8, apoptosis-related cysteine peptidase (EC:3.4.22.61)
						842	CASP9	caspase 9, apoptosis-related cysteine peptidase (EC:3.4.22.62)
						867	CBL	Cbl proto-oncogene, E3 ubiquitin protein ligase
						868	CBLB	Cbl proto-oncogene B, E3 ubiquitin protein ligase
						9063	PIAS2	protein inhibitor of activated STAT, 2
						9618	TRAF4	TNF receptor-associated factor 4
						9826	ARHGEF11	Rho guanine nucleotide exchange factor (GEF) 11
						998	CDC42	cell division cycle 42
						999	CDH1	cadherin 1, type 1
		hsa05230	Central carbon metabolism in cancer - Homo sapiens (human) (11)		11	207	AKT1	v-akt murine thymoma viral oncogene homolog 1 (EC:2.7.11.1)	yes
						2475	MTOR	mechanistic target of rapamycin (serine/threonine kinase) (EC:2.7.11.1)
						2539	G6PD	glucose-6-phosphate dehydrogenase (EC:1.1.1.49)
						3091	HIF1A	hypoxia inducible factor 1, alpha subunit (basic helix-loop-helix transcription factor)
						3099	HK2	hexokinase 2 (EC:2.7.1.1)
						5315	PKM	pyruvate kinase, muscle (EC:2.7.1.40)
						5594	MAPK1	mitogen-activated protein kinase 1 (EC:2.7.11.24)
						5595	MAPK3	mitogen-activated protein kinase 3 (EC:2.7.11.24)
						6510	SLC1A5	solute carrier family 1 (neutral amino acid transporter), member 5
						6513	SLC2A1	solute carrier family 2 (facilitated glucose transporter), member 1
						7157	TP53	tumor protein p53
		hsa05231	Choline metabolism in cancer - Homo sapiens (human) (12)		12	10163	WASF2	WAS protein family, member 2	yes
						207	AKT1	v-akt murine thymoma viral oncogene homolog 1 (EC:2.7.11.1)
						2353	FOS	FBJ murine osteosarcoma viral oncogene homolog
						2475	MTOR	mechanistic target of rapamycin (serine/threonine kinase) (EC:2.7.11.1)
						3091	HIF1A	hypoxia inducible factor 1, alpha subunit (basic helix-loop-helix transcription factor)
						3725	JUN	jun proto-oncogene
						5594	MAPK1	mitogen-activated protein kinase 1 (EC:2.7.11.24)
						5595	MAPK3	mitogen-activated protein kinase 3 (EC:2.7.11.24)
						5599	MAPK8	mitogen-activated protein kinase 8 (EC:2.7.11.24)
						5879	RAC1	ras-related C3 botulinum toxin substrate 1 (rho family, small GTP binding protein Rac1)
						6667	SP1	Sp1 transcription factor
						8394	PIP5K1A	phosphatidylinositol-4-phosphate 5-kinase, type I, alpha (EC:2.7.1.68)
		hsa05202	Transcriptional misregulation in cancer - Homo sapiens (human) (25)		25	1025	CDK9	cyclin-dependent kinase 9 (EC:2.7.11.23 2.7.11.22)	yes
						1051	CEBPB	CCAAT/enhancer binding protein (C/EBP), beta
						1236	CCR7	chemokine (C-C motif) receptor 7
						126961	HIST2H3C	histone cluster 2, H3c
						1649	DDIT3	DNA-damage-inducible transcript 3
						1655	DDX5	DEAD (Asp-Glu-Ala-Asp) box helicase 5 (EC:3.6.4.13)
						330	BIRC3	baculoviral IAP repeat containing 3
						3569	IL6	interleukin 6
						3576	CXCL8	chemokine (C-X-C motif) ligand 8
						3728	JUP	junction plakoglobin
						4314	MMP3	matrix metallopeptidase 3 (EC:3.4.24.17)
						4318	MMP9	matrix metallopeptidase 9 (EC:3.4.24.35)
						440093	H3F3C	H3 histone, family 3C
						4790	NFKB1	nuclear factor of kappa light polypeptide gene enhancer in B-cells 1
						5327	PLAT	plasminogen activator, tissue (EC:3.4.21.68)
						5371	PML	promyelocytic leukemia
						5966	REL	v-rel avian reticuloendotheliosis viral oncogene homolog
						597	BCL2A1	BCL2-related protein A1
						5970	RELA	v-rel avian reticuloendotheliosis viral oncogene homolog A
						598	BCL2L1	BCL2-like 1
						6667	SP1	Sp1 transcription factor
						7157	TP53	tumor protein p53
						8148	TAF15	TAF15 RNA polymerase II, TATA box binding protein (TBP)-associated factor, 68kDa
						904	CCNT1	cyclin T1
						929	CD14	CD14 molecule
		hsa05206	MicroRNAs in cancer - Homo sapiens (human) (27)		27	2475	MTOR	mechanistic target of rapamycin (serine/threonine kinase) (EC:2.7.11.1)	yes
						3162	HMOX1	heme oxygenase 1 (EC:1.14.99.3)
						3190	HNRNPK	heterogeneous nuclear ribonucleoprotein K
						3690	ITGB3	integrin, beta 3 (platelet glycoprotein IIIa, antigen CD61)
						3925	STMN1	stathmin 1
						406885	MIRLET7C	microRNA let-7c
						406938	MIR146A	microRNA 146a
						407034	MIR30E	microRNA 30e
						4318	MMP9	matrix metallopeptidase 9 (EC:3.4.24.35)
						4790	NFKB1	nuclear factor of kappa light polypeptide gene enhancer in B-cells 1
						4855	NOTCH4	notch 4
						5581	PRKCE	protein kinase C, epsilon (EC:2.7.11.13)
						5594	MAPK1	mitogen-activated protein kinase 1 (EC:2.7.11.24)
						5743	PTGS2	prostaglandin-endoperoxide synthase 2 (prostaglandin G/H synthase and cyclooxygenase) (EC:1.14.99.1)
						596	BCL2	B-cell CLL/lymphoma 2
						6093	ROCK1	Rho-associated, coiled-coil containing protein kinase 1 (EC:2.7.11.1)
						6774	STAT3	signal transducer and activator of transcription 3 (acute-phase response factor)
						7157	TP53	tumor protein p53
						7329	UBE2I	ubiquitin-conjugating enzyme E2I (EC:6.3.2.19)
						7422	VEGFA	vascular endothelial growth factor A
						7431	VIM	vimentin
						836	CASP3	caspase 3, apoptosis-related cysteine peptidase (EC:3.4.22.56)
						8651	SOCS1	suppressor of cytokine signaling 1
						8660	IRS2	insulin receptor substrate 2
						9493	KIF23	kinesin family member 23
						960	CD44	CD44 molecule (Indian blood group)
						993	CDC25A	cell division cycle 25A (EC:3.1.3.48)
		hsa05205	Proteoglycans in cancer - Homo sapiens (human) (46)		46	10855	HPSE	heparanase (EC:3.2.1.166)	yes
						1432	MAPK14	mitogen-activated protein kinase 14 (EC:2.7.11.24)
						1499	CTNNB1	catenin (cadherin-associated protein), beta 1, 88kDa
						1514	CTSL	cathepsin L (EC:3.4.22.15)
						1655	DDX5	DEAD (Asp-Glu-Ala-Asp) box helicase 5 (EC:3.6.4.13)
						1839	HBEGF	heparin-binding EGF-like growth factor
						1975	EIF4B	eukaryotic translation initiation factor 4B
						207	AKT1	v-akt murine thymoma viral oncogene homolog 1 (EC:2.7.11.1)
						2316	FLNA	filamin A, alpha
						2335	FN1	fibronectin 1
						23624	CBLC	Cbl proto-oncogene C, E3 ubiquitin protein ligase
						2475	MTOR	mechanistic target of rapamycin (serine/threonine kinase) (EC:2.7.11.1)
						2549	GAB1	GRB2-associated binding protein 1
						3091	HIF1A	hypoxia inducible factor 1, alpha subunit (basic helix-loop-helix transcription factor)
						355	FAS	Fas cell surface death receptor
						356	FASLG	Fas ligand (TNF superfamily, member 6)
						3593	IL12B	interleukin 12B
						3690	ITGB3	integrin, beta 3 (platelet glycoprotein IIIa, antigen CD61)
						3791	KDR	kinase insert domain receptor (EC:2.7.10.1)
						4313	MMP2	matrix metallopeptidase 2 (EC:3.4.24.24)
						4318	MMP9	matrix metallopeptidase 9 (EC:3.4.24.35)
						5594	MAPK1	mitogen-activated protein kinase 1 (EC:2.7.11.24)
						5595	MAPK3	mitogen-activated protein kinase 3 (EC:2.7.11.24)
						5600	MAPK11	mitogen-activated protein kinase 11 (EC:2.7.11.24)
						5879	RAC1	ras-related C3 botulinum toxin substrate 1 (rho family, small GTP binding protein Rac1)
						60	ACTB	actin, beta
						6093	ROCK1	Rho-associated, coiled-coil containing protein kinase 1 (EC:2.7.11.1)
						6194	RPS6	ribosomal protein S6
						6382	SDC1	syndecan 1
						6383	SDC2	syndecan 2
						6714	SRC	SRC proto-oncogene, non-receptor tyrosine kinase (EC:2.7.10.2)
						6774	STAT3	signal transducer and activator of transcription 3 (acute-phase response factor)
						7097	TLR2	toll-like receptor 2
						7099	TLR4	toll-like receptor 4
						71	ACTG1	actin gamma 1
						7124	TNF	tumor necrosis factor
						7157	TP53	tumor protein p53
						7422	VEGFA	vascular endothelial growth factor A
						7448	VTN	vitronectin
						816	CAMK2B	calcium/calmodulin-dependent protein kinase II beta (EC:2.7.11.17)
						836	CASP3	caspase 3, apoptosis-related cysteine peptidase (EC:3.4.22.56)
						857	CAV1	caveolin 1, caveolae protein, 22kDa
						867	CBL	Cbl proto-oncogene, E3 ubiquitin protein ligase
						868	CBLB	Cbl proto-oncogene B, E3 ubiquitin protein ligase
						960	CD44	CD44 molecule (Indian blood group)
						998	CDC42	cell division cycle 42
		hsa05204	Chemical carcinogenesis - Homo sapiens (human) (4)		4	125	ADH1B	alcohol dehydrogenase 1B (class I), beta polypeptide (EC:1.1.1.1)	yes
						405	ARNT	aryl hydrocarbon receptor nuclear translocator
						5743	PTGS2	prostaglandin-endoperoxide synthase 2 (prostaglandin G/H synthase and cyclooxygenase) (EC:1.14.99.1)
						873	CBR1	carbonyl reductase 1 (EC:1.1.1.189 1.1.1.197 1.1.1.184)
		hsa05203	Viral carcinogenesis - Homo sapiens (human) (52)		52	10379	IRF9	interferon regulatory factor 9	yes
						1111	CHEK1	checkpoint kinase 1 (EC:2.7.11.1)
						121504	HIST4H4	histone cluster 4, H4
						1234	CCR5	chemokine (C-C motif) receptor 5 (gene/pseudogene)
						1654	DDX3X	DEAD (Asp-Glu-Ala-Asp) box helicase 3, X-linked (EC:3.6.4.13)
						23352	UBR4	ubiquitin protein ligase E3 component n-recognin 4
						255626	HIST1H2BA	histone cluster 1, H2ba
						27044	SND1	staphylococcal nuclease and tudor domain containing 1
						3017	HIST1H2BD	histone cluster 1, H2bd
						3018	HIST1H2BB	histone cluster 1, H2bb
						3105	HLA-A	major histocompatibility complex, class I, A
						3106	HLA-B	major histocompatibility complex, class I, B
						3107	HLA-C	major histocompatibility complex, class I, C
						3190	HNRNPK	heterogeneous nuclear ribonucleoprotein K
						3249	HPN	hepsin (EC:3.4.21.106)
						3661	IRF3	interferon regulatory factor 3
						3665	IRF7	interferon regulatory factor 7
						3718	JAK3	Janus kinase 3 (EC:2.7.10.2)
						3725	JUN	jun proto-oncogene
						468	ATF4	activating transcription factor 4
						4790	NFKB1	nuclear factor of kappa light polypeptide gene enhancer in B-cells 1
						4791	NFKB2	nuclear factor of kappa light polypeptide gene enhancer in B-cells 2 (p49/p100)
						4792	NFKBIA	nuclear factor of kappa light polypeptide gene enhancer in B-cells inhibitor, alpha
						5315	PKM	pyruvate kinase, muscle (EC:2.7.1.40)
						5366	PMAIP1	phorbol-12-myristate-13-acetate-induced protein 1
						5594	MAPK1	mitogen-activated protein kinase 1 (EC:2.7.11.24)
						5595	MAPK3	mitogen-activated protein kinase 3 (EC:2.7.11.24)
						5610	EIF2AK2	eukaryotic translation initiation factor 2-alpha kinase 2 (EC:2.7.11.1 2.7.10.2)
						5700	PSMC1	proteasome (prosome, macropain) 26S subunit, ATPase, 1
						581	BAX	BCL2-associated X protein
						5879	RAC1	ras-related C3 botulinum toxin substrate 1 (rho family, small GTP binding protein Rac1)
						5966	REL	v-rel avian reticuloendotheliosis viral oncogene homolog
						5970	RELA	v-rel avian reticuloendotheliosis viral oncogene homolog A
						6714	SRC	SRC proto-oncogene, non-receptor tyrosine kinase (EC:2.7.10.2)
						6774	STAT3	signal transducer and activator of transcription 3 (acute-phase response factor)
						6850	SYK	spleen tyrosine kinase (EC:2.7.10.2)
						7157	TP53	tumor protein p53
						7337	UBE3A	ubiquitin protein ligase E3A (EC:6.3.2.19)
						7419	VDAC3	voltage-dependent anion channel 3
						8345	HIST1H2BH	histone cluster 1, H2bh
						8347	HIST1H2BC	histone cluster 1, H2bc
						8349	HIST2H2BE	histone cluster 2, H2be
						836	CASP3	caspase 3, apoptosis-related cysteine peptidase (EC:3.4.22.56)
						8365	HIST1H4H	histone cluster 1, H4h
						8370	HIST2H4A	histone cluster 2, H4a
						841	CASP8	caspase 8, apoptosis-related cysteine peptidase (EC:3.4.22.61)
						85236	HIST1H2BK	histone cluster 1, H2bk
						8850	KAT2B	K(lysine) acetyltransferase 2B (EC:2.3.1.48)
						9114	ATP6V0D1	ATPase, H+ transporting, lysosomal 38kDa, V0 subunit d1 (EC:3.6.3.14)
						983	CDK1	cyclin-dependent kinase 1 (EC:2.7.11.23 2.7.11.22)
						991	CDC20	cell division cycle 20
						998	CDC42	cell division cycle 42
	6.2 Cancers: Specific types
		hsa05210	Colorectal cancer - Homo sapiens (human) (17)	C=62;O=17;E=1.44;R=11.77;rawP=4.27e-14;adjP=1.86e-13	17	1499	CTNNB1	catenin (cadherin-associated protein), beta 1, 88kDa
						207	AKT1	v-akt murine thymoma viral oncogene homolog 1 (EC:2.7.11.1)
						2353	FOS	FBJ murine osteosarcoma viral oncogene homolog
						2932	GSK3B	glycogen synthase kinase 3 beta (EC:2.7.11.1 2.7.11.26)
						332	BIRC5	baculoviral IAP repeat containing 5
						3725	JUN	jun proto-oncogene
						5594	MAPK1	mitogen-activated protein kinase 1 (EC:2.7.11.24)
						5595	MAPK3	mitogen-activated protein kinase 3 (EC:2.7.11.24)
						5599	MAPK8	mitogen-activated protein kinase 8 (EC:2.7.11.24)
						581	BAX	BCL2-associated X protein
						5879	RAC1	ras-related C3 botulinum toxin substrate 1 (rho family, small GTP binding protein Rac1)
						596	BCL2	B-cell CLL/lymphoma 2
						6934	TCF7L2	transcription factor 7-like 2 (T-cell specific, HMG-box)
						7157	TP53	tumor protein p53
						8312	AXIN1	axin 1
						836	CASP3	caspase 3, apoptosis-related cysteine peptidase (EC:3.4.22.56)
						842	CASP9	caspase 9, apoptosis-related cysteine peptidase (EC:3.4.22.62)
		hsa05212	Pancreatic cancer - Homo sapiens (human) (14)	C=70;O=15;E=1.63;R=9.20;rawP=6.40e-11;adjP=1.90e-10	15	207	AKT1	v-akt murine thymoma viral oncogene homolog 1 (EC:2.7.11.1)
						4790	NFKB1	nuclear factor of kappa light polypeptide gene enhancer in B-cells 1
						5594	MAPK1	mitogen-activated protein kinase 1 (EC:2.7.11.24)
						5595	MAPK3	mitogen-activated protein kinase 3 (EC:2.7.11.24)
						5599	MAPK8	mitogen-activated protein kinase 8 (EC:2.7.11.24)
						5879	RAC1	ras-related C3 botulinum toxin substrate 1 (rho family, small GTP binding protein Rac1)
						5970	RELA	v-rel avian reticuloendotheliosis viral oncogene homolog A
						598	BCL2L1	BCL2-like 1
						6772	STAT1	signal transducer and activator of transcription 1, 91kDa
						6774	STAT3	signal transducer and activator of transcription 3 (acute-phase response factor)
						7157	TP53	tumor protein p53
						7422	VEGFA	vascular endothelial growth factor A
						842	CASP9	caspase 9, apoptosis-related cysteine peptidase (EC:3.4.22.62)
						998	CDC42	cell division cycle 42
						7424	VEGFC	vascular endothelial growth factor C
		hsa05214	Glioma - Homo sapiens (human) (6)	C=65;O=6;E=1.51;R=3.96;rawP=0.0041;adjP=0.0057	6	207	AKT1	v-akt murine thymoma viral oncogene homolog 1 (EC:2.7.11.1)
						2475	MTOR	mechanistic target of rapamycin (serine/threonine kinase) (EC:2.7.11.1)
						5594	MAPK1	mitogen-activated protein kinase 1 (EC:2.7.11.24)
						5595	MAPK3	mitogen-activated protein kinase 3 (EC:2.7.11.24)
						7157	TP53	tumor protein p53
						816	CAMK2B	calcium/calmodulin-dependent protein kinase II beta (EC:2.7.11.17)
		hsa05216	Thyroid cancer - Homo sapiens (human) (6)	C=29;O=6;E=0.68;R=8.88;rawP=4.74e-05;adjP=8.55e-05	6	1499	CTNNB1	catenin (cadherin-associated protein), beta 1, 88kDa
						5594	MAPK1	mitogen-activated protein kinase 1 (EC:2.7.11.24)
						5595	MAPK3	mitogen-activated protein kinase 3 (EC:2.7.11.24)
						6934	TCF7L2	transcription factor 7-like 2 (T-cell specific, HMG-box)
						7157	TP53	tumor protein p53
						999	CDH1	cadherin 1, type 1
		hsa05221	Acute myeloid leukemia - Homo sapiens (human) (10)	C=57;O=10;E=1.33;R=7.53;rawP=7.23e-07;adjP=1.49e-06	10	207	AKT1	v-akt murine thymoma viral oncogene homolog 1 (EC:2.7.11.1)
						2475	MTOR	mechanistic target of rapamycin (serine/threonine kinase) (EC:2.7.11.1)
						3728	JUP	junction plakoglobin
						4790	NFKB1	nuclear factor of kappa light polypeptide gene enhancer in B-cells 1
						5371	PML	promyelocytic leukemia
						5594	MAPK1	mitogen-activated protein kinase 1 (EC:2.7.11.24)
						5595	MAPK3	mitogen-activated protein kinase 3 (EC:2.7.11.24)
						5970	RELA	v-rel avian reticuloendotheliosis viral oncogene homolog A
						6774	STAT3	signal transducer and activator of transcription 3 (acute-phase response factor)
						6934	TCF7L2	transcription factor 7-like 2 (T-cell specific, HMG-box)
		hsa05220	Chronic myeloid leukemia - Homo sapiens (human) (11)	C=73;O=11;E=1.70;R=6.47;rawP=9.93e-07;adjP=2.02e-06	11	207	AKT1	v-akt murine thymoma viral oncogene homolog 1 (EC:2.7.11.1)
						23624	CBLC	Cbl proto-oncogene C, E3 ubiquitin protein ligase
						4790	NFKB1	nuclear factor of kappa light polypeptide gene enhancer in B-cells 1
						4792	NFKBIA	nuclear factor of kappa light polypeptide gene enhancer in B-cells inhibitor, alpha
						5594	MAPK1	mitogen-activated protein kinase 1 (EC:2.7.11.24)
						5595	MAPK3	mitogen-activated protein kinase 3 (EC:2.7.11.24)
						5970	RELA	v-rel avian reticuloendotheliosis viral oncogene homolog A
						598	BCL2L1	BCL2-like 1
						7157	TP53	tumor protein p53
						867	CBL	Cbl proto-oncogene, E3 ubiquitin protein ligase
						868	CBLB	Cbl proto-oncogene B, E3 ubiquitin protein ligase
		hsa05217	Basal cell carcinoma - Homo sapiens (human) (5)		5	1499	CTNNB1	catenin (cadherin-associated protein), beta 1, 88kDa	yes
						2932	GSK3B	glycogen synthase kinase 3 beta (EC:2.7.11.1 2.7.11.26)
						6934	TCF7L2	transcription factor 7-like 2 (T-cell specific, HMG-box)
						7157	TP53	tumor protein p53
						8312	AXIN1	axin 1
		hsa05218	Melanoma - Homo sapiens (human) (5)		5	207	AKT1	v-akt murine thymoma viral oncogene homolog 1 (EC:2.7.11.1)	yes
						5594	MAPK1	mitogen-activated protein kinase 1 (EC:2.7.11.24)
						5595	MAPK3	mitogen-activated protein kinase 3 (EC:2.7.11.24)
						7157	TP53	tumor protein p53
						999	CDH1	cadherin 1, type 1
		hsa05211	Renal cell carcinoma - Homo sapiens (human) (14)	C=70;O=14;E=1.63;R=8.58;rawP=7.33e-10;adjP=2.06e-09	14	2034	EPAS1	endothelial PAS domain protein 1
						207	AKT1	v-akt murine thymoma viral oncogene homolog 1 (EC:2.7.11.1)
						2271	FH	fumarate hydratase (EC:4.2.1.2)
						2549	GAB1	GRB2-associated binding protein 1
						3091	HIF1A	hypoxia inducible factor 1, alpha subunit (basic helix-loop-helix transcription factor)
						3725	JUN	jun proto-oncogene
						405	ARNT	aryl hydrocarbon receptor nuclear translocator
						5594	MAPK1	mitogen-activated protein kinase 1 (EC:2.7.11.24)
						5595	MAPK3	mitogen-activated protein kinase 3 (EC:2.7.11.24)
						5879	RAC1	ras-related C3 botulinum toxin substrate 1 (rho family, small GTP binding protein Rac1)
						6513	SLC2A1	solute carrier family 2 (facilitated glucose transporter), member 1
						7422	VEGFA	vascular endothelial growth factor A
						998	CDC42	cell division cycle 42
						7424	VEGFC	vascular endothelial growth factor C
		hsa05219	Bladder cancer - Homo sapiens (human) (10)	C=42;O=10;E=0.98;R=9.20;rawP=4.37e-07;adjP=9.27e-07	10	1839	HBEGF	heparin-binding EGF-like growth factor
						3576	CXCL8	chemokine (C-X-C motif) ligand 8
						4313	MMP2	matrix metallopeptidase 2 (EC:3.4.24.24)
						4318	MMP9	matrix metallopeptidase 9 (EC:3.4.24.35)
						5594	MAPK1	mitogen-activated protein kinase 1 (EC:2.7.11.24)
						5595	MAPK3	mitogen-activated protein kinase 3 (EC:2.7.11.24)
						6714	SRC	SRC proto-oncogene, non-receptor tyrosine kinase (EC:2.7.10.2)
						7157	TP53	tumor protein p53
						7422	VEGFA	vascular endothelial growth factor A
						999	CDH1	cadherin 1, type 1
						7424	VEGFC	vascular endothelial growth factor C
		hsa05215	Prostate cancer - Homo sapiens (human) (17)	C=89;O=17;E=2.07;R=8.20;rawP=2.43e-11;adjP=7.48e-11	17	1499	CTNNB1	catenin (cadherin-associated protein), beta 1, 88kDa
						207	AKT1	v-akt murine thymoma viral oncogene homolog 1 (EC:2.7.11.1)
						2475	MTOR	mechanistic target of rapamycin (serine/threonine kinase) (EC:2.7.11.1)
						2932	GSK3B	glycogen synthase kinase 3 beta (EC:2.7.11.1 2.7.11.26)
						3320	HSP90AA1	heat shock protein 90kDa alpha (cytosolic), class A member 1
						3326	HSP90AB1	heat shock protein 90kDa alpha (cytosolic), class B member 1
						468	ATF4	activating transcription factor 4
						4790	NFKB1	nuclear factor of kappa light polypeptide gene enhancer in B-cells 1
						4792	NFKBIA	nuclear factor of kappa light polypeptide gene enhancer in B-cells inhibitor, alpha
						5594	MAPK1	mitogen-activated protein kinase 1 (EC:2.7.11.24)
						5595	MAPK3	mitogen-activated protein kinase 3 (EC:2.7.11.24)
						596	BCL2	B-cell CLL/lymphoma 2
						5970	RELA	v-rel avian reticuloendotheliosis viral oncogene homolog A
						6934	TCF7L2	transcription factor 7-like 2 (T-cell specific, HMG-box)
						7157	TP53	tumor protein p53
						7184	HSP90B1	heat shock protein 90kDa beta (Grp94), member 1
						842	CASP9	caspase 9, apoptosis-related cysteine peptidase (EC:3.4.22.62)
		hsa05213	Endometrial cancer - Homo sapiens (human) (10)	C=52;O=10;E=1.21;R=8.25;rawP=2.94e-07;adjP=6.37e-07	10	1499	CTNNB1	catenin (cadherin-associated protein), beta 1, 88kDa
						207	AKT1	v-akt murine thymoma viral oncogene homolog 1 (EC:2.7.11.1)
						2932	GSK3B	glycogen synthase kinase 3 beta (EC:2.7.11.1 2.7.11.26)
						5594	MAPK1	mitogen-activated protein kinase 1 (EC:2.7.11.24)
						5595	MAPK3	mitogen-activated protein kinase 3 (EC:2.7.11.24)
						6934	TCF7L2	transcription factor 7-like 2 (T-cell specific, HMG-box)
						7157	TP53	tumor protein p53
						8312	AXIN1	axin 1
						842	CASP9	caspase 9, apoptosis-related cysteine peptidase (EC:3.4.22.62)
						999	CDH1	cadherin 1, type 1
		hsa05222	Small cell lung cancer - Homo sapiens (human) (18)	C=85;O=18;E=1.98;R=9.09;rawP=9.84e-13;adjP=3.59e-12	18	1164	CKS2	CDC28 protein kinase regulatory subunit 2
						207	AKT1	v-akt murine thymoma viral oncogene homolog 1 (EC:2.7.11.1)
						2335	FN1	fibronectin 1
						329	BIRC2	baculoviral IAP repeat containing 2
						330	BIRC3	baculoviral IAP repeat containing 3
						331	XIAP	X-linked inhibitor of apoptosis, E3 ubiquitin protein ligase
						3912	LAMB1	laminin, beta 1
						4790	NFKB1	nuclear factor of kappa light polypeptide gene enhancer in B-cells 1
						4792	NFKBIA	nuclear factor of kappa light polypeptide gene enhancer in B-cells inhibitor, alpha
						4843	NOS2	nitric oxide synthase 2, inducible (EC:1.14.13.39)
						5743	PTGS2	prostaglandin-endoperoxide synthase 2 (prostaglandin G/H synthase and cyclooxygenase) (EC:1.14.99.1)
						596	BCL2	B-cell CLL/lymphoma 2
						5970	RELA	v-rel avian reticuloendotheliosis viral oncogene homolog A
						598	BCL2L1	BCL2-like 1
						7157	TP53	tumor protein p53
						842	CASP9	caspase 9, apoptosis-related cysteine peptidase (EC:3.4.22.62)
						9063	PIAS2	protein inhibitor of activated STAT, 2
						9618	TRAF4	TNF receptor-associated factor 4
		hsa05223	Non-small cell lung cancer - Homo sapiens (human) (5)		5	207	AKT1	v-akt murine thymoma viral oncogene homolog 1 (EC:2.7.11.1)	yes
						5594	MAPK1	mitogen-activated protein kinase 1 (EC:2.7.11.24)
						5595	MAPK3	mitogen-activated protein kinase 3 (EC:2.7.11.24)
						7157	TP53	tumor protein p53
						842	CASP9	caspase 9, apoptosis-related cysteine peptidase (EC:3.4.22.62)
	6.3 Immune diseases
		hsa05310	Asthma - Homo sapiens (human) (6)	C=30;O=6;E=0.70;R=8.58;rawP=5.80e-05;adjP=0.0001	6	2205	FCER1A	Fc fragment of IgE, high affinity I, receptor for
						3123	HLA-DRB1	major histocompatibility complex, class II, DR beta 1
						3565	IL4	interleukin 4
						3586	IL10	interleukin 10
						7124	TNF	tumor necrosis factor
						959	CD40LG	CD40 ligand
		hsa05322	Systemic lupus erythematosus - Homo sapiens (human) (28)	C=136;O=28;E=3.17;R=8.83;rawP=1.11e-18;adjP=6.22e-18	28	121504	HIST4H4	histone cluster 4, H4
						126961	HIST2H3C	histone cluster 2, H3c
						2214	FCGR3A	Fc fragment of IgG, low affinity IIIa, receptor (CD16a)
						255626	HIST1H2BA	histone cluster 1, H2ba
						3014	H2AFX	H2A histone family, member X
						3017	HIST1H2BD	histone cluster 1, H2bd
						3018	HIST1H2BB	histone cluster 1, H2bb
						3123	HLA-DRB1	major histocompatibility complex, class II, DR beta 1
						3458	IFNG	interferon, gamma
						3586	IL10	interleukin 10
						440093	H3F3C	H3 histone, family 3C
						6741	SSB	Sjogren syndrome antigen B (autoantigen La)
						712	C1QA	complement component 1, q subcomponent, A chain
						7124	TNF	tumor necrosis factor
						713	C1QB	complement component 1, q subcomponent, B chain
						716	C1S	complement component 1, s subcomponent (EC:3.4.21.42)
						720	C4A	complement component 4A (Rodgers blood group)
						721	C4B	complement component 4B (Chido blood group)
						727	C5	complement component 5
						8337	HIST2H2AA3	histone cluster 2, H2aa3
						8338	HIST2H2AC	histone cluster 2, H2ac
						8345	HIST1H2BH	histone cluster 1, H2bh
						8347	HIST1H2BC	histone cluster 1, H2bc
						8349	HIST2H2BE	histone cluster 2, H2be
						8365	HIST1H4H	histone cluster 1, H4h
						8370	HIST2H4A	histone cluster 2, H4a
						85236	HIST1H2BK	histone cluster 1, H2bk
						959	CD40LG	CD40 ligand
		hsa05323	Rheumatoid arthritis - Homo sapiens (human) (32)	C=91;O=32;E=2.12;R=15.09;rawP=3.53e-29;adjP=6.16e-28	32	10673	TNFSF13B	tumor necrosis factor (ligand) superfamily, member 13b
						127124	ATP6V1G3	ATPase, H+ transporting, lysosomal 13kDa, V1 subunit G3 (EC:3.6.3.14)
						1514	CTSL	cathepsin L (EC:3.4.22.15)
						2353	FOS	FBJ murine osteosarcoma viral oncogene homolog
						245973	ATP6V1C2	ATPase, H+ transporting, lysosomal 42kDa, V1 subunit C2 (EC:3.6.3.14)
						284	ANGPT1	angiopoietin 1
						3123	HLA-DRB1	major histocompatibility complex, class II, DR beta 1
						3383	ICAM1	intercellular adhesion molecule 1
						3458	IFNG	interferon, gamma
						3553	IL1B	interleukin 1, beta
						3569	IL6	interleukin 6
						3576	CXCL8	chemokine (C-X-C motif) ligand 8
						3606	IL18	interleukin 18
						3725	JUN	jun proto-oncogene
						4314	MMP3	matrix metallopeptidase 3 (EC:3.4.24.17)
						51606	ATP6V1H	ATPase, H+ transporting, lysosomal 50/57kDa, V1 subunit H (EC:3.6.3.14)
						525	ATP6V1B1	ATPase, H+ transporting, lysosomal 56/58kDa, V1 subunit B1 (EC:3.6.3.14)
						526	ATP6V1B2	ATPase, H+ transporting, lysosomal 56/58kDa, V1 subunit B2 (EC:3.6.3.14)
						527	ATP6V0C	ATPase, H+ transporting, lysosomal 16kDa, V0 subunit c (EC:3.6.3.14)
						533	ATP6V0B	ATPase, H+ transporting, lysosomal 21kDa, V0 subunit b (EC:3.6.3.14)
						534	ATP6V1G2	ATPase, H+ transporting, lysosomal 13kDa, V1 subunit G2 (EC:3.6.3.14)
						535	ATP6V0A1	ATPase, H+ transporting, lysosomal V0 subunit a1 (EC:3.6.3.14)
						537	ATP6AP1	ATPase, H+ transporting, lysosomal accessory protein 1 (EC:3.6.3.14)
						6347	CCL2	chemokine (C-C motif) ligand 2
						6348	CCL3	chemokine (C-C motif) ligand 3
						6352	CCL5	chemokine (C-C motif) ligand 5
						7097	TLR2	toll-like receptor 2
						7099	TLR4	toll-like receptor 4
						7124	TNF	tumor necrosis factor
						7422	VEGFA	vascular endothelial growth factor A
						8992	ATP6V0E1	ATPase, H+ transporting, lysosomal 9kDa, V0 subunit e1 (EC:3.6.3.14)
						9114	ATP6V0D1	ATPase, H+ transporting, lysosomal 38kDa, V0 subunit d1 (EC:3.6.3.14)
		hsa05320	Autoimmune thyroid disease - Homo sapiens (human) (12)	C=52;O=12;E=1.21;R=9.90;rawP=2.10e-09;adjP=5.40e-09	12	3105	HLA-A	major histocompatibility complex, class I, A
						3106	HLA-B	major histocompatibility complex, class I, B
						3107	HLA-C	major histocompatibility complex, class I, C
						3123	HLA-DRB1	major histocompatibility complex, class II, DR beta 1
						3439	IFNA1	interferon, alpha 1
						3440	IFNA2	interferon, alpha 2
						355	FAS	Fas cell surface death receptor
						3558	IL2	interleukin 2
						356	FASLG	Fas ligand (TNF superfamily, member 6)
						3565	IL4	interleukin 4
						3586	IL10	interleukin 10
						959	CD40LG	CD40 ligand
		hsa05321	Inflammatory bowel disease (IBD) - Homo sapiens (human) (19)		19	3123	HLA-DRB1	major histocompatibility complex, class II, DR beta 1	yes
						3458	IFNG	interferon, gamma
						3553	IL1B	interleukin 1, beta
						3558	IL2	interleukin 2
						3565	IL4	interleukin 4
						3569	IL6	interleukin 6
						3586	IL10	interleukin 10
						3592	IL12A	interleukin 12A
						3593	IL12B	interleukin 12B
						3606	IL18	interleukin 18
						3725	JUN	jun proto-oncogene
						4790	NFKB1	nuclear factor of kappa light polypeptide gene enhancer in B-cells 1
						5970	RELA	v-rel avian reticuloendotheliosis viral oncogene homolog A
						6772	STAT1	signal transducer and activator of transcription 1, 91kDa
						6774	STAT3	signal transducer and activator of transcription 3 (acute-phase response factor)
						7097	TLR2	toll-like receptor 2
						7099	TLR4	toll-like receptor 4
						7124	TNF	tumor necrosis factor
						8807	IL18RAP	interleukin 18 receptor accessory protein
		hsa05330	Allograft rejection - Homo sapiens (human) (14)	C=37;O=14;E=0.86;R=16.24;rawP=4.73e-14;adjP=2.01e-13	14	3105	HLA-A	major histocompatibility complex, class I, A
						3106	HLA-B	major histocompatibility complex, class I, B
						3107	HLA-C	major histocompatibility complex, class I, C
						3123	HLA-DRB1	major histocompatibility complex, class II, DR beta 1
						3458	IFNG	interferon, gamma
						355	FAS	Fas cell surface death receptor
						3558	IL2	interleukin 2
						356	FASLG	Fas ligand (TNF superfamily, member 6)
						3565	IL4	interleukin 4
						3586	IL10	interleukin 10
						3592	IL12A	interleukin 12A
						3593	IL12B	interleukin 12B
						7124	TNF	tumor necrosis factor
						959	CD40LG	CD40 ligand
		hsa05332	Graft-versus-host disease - Homo sapiens (human) (11)	C=41;O=11;E=0.96;R=11.51;rawP=1.74e-09;adjP=4.55e-09	11	3105	HLA-A	major histocompatibility complex, class I, A
						3106	HLA-B	major histocompatibility complex, class I, B
						3107	HLA-C	major histocompatibility complex, class I, C
						3123	HLA-DRB1	major histocompatibility complex, class II, DR beta 1
						3458	IFNG	interferon, gamma
						355	FAS	Fas cell surface death receptor
						3553	IL1B	interleukin 1, beta
						3558	IL2	interleukin 2
						356	FASLG	Fas ligand (TNF superfamily, member 6)
						3569	IL6	interleukin 6
						7124	TNF	tumor necrosis factor
		hsa05340	Primary immunodeficiency - Homo sapiens (human) (7)	C=35;O=7;E=0.82;R=8.58;rawP=1.39e-05;adjP=2.60e-05	7	3718	JAK3	Janus kinase 3 (EC:2.7.10.2)
						3932	LCK	LCK proto-oncogene, Src family tyrosine kinase (EC:2.7.10.2)
						6890	TAP1	transporter 1, ATP-binding cassette, sub-family B (MDR/TAP)
						7535	ZAP70	zeta-chain (TCR) associated protein kinase 70kDa (EC:2.7.10.2)
						920	CD4	CD4 molecule
						925	CD8A	CD8a molecule
						959	CD40LG	CD40 ligand
	6.4 Neurodegenerative diseases
		hsa05010	Alzheimer's disease - Homo sapiens (human) (16)	C=167;O=16;E=3.89;R=4.11;rawP=2.11e-06;adjP=4.19e-06	16	2081	ERN1	endoplasmic reticulum to nucleus signaling 1 (EC:2.7.11.1)
						22926	ATF6	activating transcription factor 6
						2597	GAPDH	glyceraldehyde-3-phosphate dehydrogenase (EC:1.2.1.12)
						2932	GSK3B	glycogen synthase kinase 3 beta (EC:2.7.11.1 2.7.11.26)
						348	APOE	apolipoprotein E
						355	FAS	Fas cell surface death receptor
						3553	IL1B	interleukin 1, beta
						488	ATP2A2	ATPase, Ca++ transporting, cardiac muscle, slow twitch 2 (EC:3.6.3.8)
						506	ATP5B	ATP synthase, H+ transporting, mitochondrial F1 complex, beta polypeptide (EC:3.6.3.14)
						5594	MAPK1	mitogen-activated protein kinase 1 (EC:2.7.11.24)
						5595	MAPK3	mitogen-activated protein kinase 3 (EC:2.7.11.24)
						7124	TNF	tumor necrosis factor
						836	CASP3	caspase 3, apoptosis-related cysteine peptidase (EC:3.4.22.56)
						841	CASP8	caspase 8, apoptosis-related cysteine peptidase (EC:3.4.22.61)
						842	CASP9	caspase 9, apoptosis-related cysteine peptidase (EC:3.4.22.62)
						9451	EIF2AK3	eukaryotic translation initiation factor 2-alpha kinase 3 (EC:2.7.11.1)
		hsa05012	Parkinson's disease - Homo sapiens (human) (8)		8	292	SLC25A5	solute carrier family 25 (mitochondrial carrier	yes
						293	SLC25A6	solute carrier family 25 (mitochondrial carrier
						506	ATP5B	ATP synthase, H+ transporting, mitochondrial F1 complex, beta polypeptide (EC:3.6.3.14)
						51465	UBE2J1	ubiquitin-conjugating enzyme E2, J1 (EC:6.3.2.19)
						7419	VDAC3	voltage-dependent anion channel 3
						836	CASP3	caspase 3, apoptosis-related cysteine peptidase (EC:3.4.22.56)
						842	CASP9	caspase 9, apoptosis-related cysteine peptidase (EC:3.4.22.62)
						9246	UBE2L6	ubiquitin-conjugating enzyme E2L 6 (EC:6.3.2.19)
		hsa05014	Amyotrophic lateral sclerosis (ALS) - Homo sapiens (human) (15)	C=53;O=15;E=1.24;R=12.15;rawP=8.02e-13;adjP=3.00e-12	15	1432	MAPK14	mitogen-activated protein kinase 14 (EC:2.7.11.24)
						1616	DAXX	death-domain associated protein
						5600	MAPK11	mitogen-activated protein kinase 11 (EC:2.7.11.24)
						581	BAX	BCL2-associated X protein
						5868	RAB5A	RAB5A, member RAS oncogene family
						5879	RAC1	ras-related C3 botulinum toxin substrate 1 (rho family, small GTP binding protein Rac1)
						596	BCL2	B-cell CLL/lymphoma 2
						598	BCL2L1	BCL2-like 1
						7124	TNF	tumor necrosis factor
						7157	TP53	tumor protein p53
						834	CASP1	caspase 1, apoptosis-related cysteine peptidase (EC:3.4.22.36)
						836	CASP3	caspase 3, apoptosis-related cysteine peptidase (EC:3.4.22.56)
						842	CASP9	caspase 9, apoptosis-related cysteine peptidase (EC:3.4.22.62)
						847	CAT	catalase (EC:1.11.1.6)
						9973	CCS	copper chaperone for superoxide dismutase
		hsa05016	Huntington's disease - Homo sapiens (human) (21)	C=183;O=21;E=4.26;R=4.92;rawP=2.32e-09;adjP=5.78e-09	21	10540	DCTN2	dynactin 2 (p50)
						1173	AP2M1	adaptor-related protein complex 2, mu 1 subunit
						1212	CLTB	clathrin, light chain B
						1213	CLTC	clathrin, heavy chain (Hc)
						160	AP2A1	adaptor-related protein complex 2, alpha 1 subunit
						163	AP2B1	adaptor-related protein complex 2, beta 1 subunit
						1639	DCTN1	dynactin 1
						27113	BBC3	BCL2 binding component 3
						292	SLC25A5	solute carrier family 25 (mitochondrial carrier
						293	SLC25A6	solute carrier family 25 (mitochondrial carrier
						3092	HIP1	huntingtin interacting protein 1
						506	ATP5B	ATP synthase, H+ transporting, mitochondrial F1 complex, beta polypeptide (EC:3.6.3.14)
						581	BAX	BCL2-associated X protein
						6648	SOD2	superoxide dismutase 2, mitochondrial (EC:1.15.1.1)
						6667	SP1	Sp1 transcription factor
						7052	TGM2	transglutaminase 2 (EC:2.3.2.13)
						7157	TP53	tumor protein p53
						7419	VDAC3	voltage-dependent anion channel 3
						836	CASP3	caspase 3, apoptosis-related cysteine peptidase (EC:3.4.22.56)
						841	CASP8	caspase 8, apoptosis-related cysteine peptidase (EC:3.4.22.61)
						842	CASP9	caspase 9, apoptosis-related cysteine peptidase (EC:3.4.22.62)
		hsa05020	Prion diseases - Homo sapiens (human) (13)	C=35;O=13;E=0.82;R=15.94;rawP=5.09e-13;adjP=1.95e-12	13	1958	EGR1	early growth response 1
						2534	FYN	FYN proto-oncogene, Src family tyrosine kinase (EC:2.7.10.2)
						3303	HSPA1A	heat shock 70kDa protein 1A
						3309	HSPA5	heat shock 70kDa protein 5 (glucose-regulated protein, 78kDa)
						3553	IL1B	interleukin 1, beta
						3569	IL6	interleukin 6
						5594	MAPK1	mitogen-activated protein kinase 1 (EC:2.7.11.24)
						5595	MAPK3	mitogen-activated protein kinase 3 (EC:2.7.11.24)
						581	BAX	BCL2-associated X protein
						6352	CCL5	chemokine (C-C motif) ligand 5
						712	C1QA	complement component 1, q subcomponent, A chain
						713	C1QB	complement component 1, q subcomponent, B chain
						727	C5	complement component 5
	6.5 Substance dependence
		hsa05030	Cocaine addiction - Homo sapiens (human) (5)		5	3725	JUN	jun proto-oncogene	yes
						4129	MAOB	monoamine oxidase B (EC:1.4.3.4)
						468	ATF4	activating transcription factor 4
						4790	NFKB1	nuclear factor of kappa light polypeptide gene enhancer in B-cells 1
						5970	RELA	v-rel avian reticuloendotheliosis viral oncogene homolog A
		hsa05031	Amphetamine addiction - Homo sapiens (human) (5)		5	2353	FOS	FBJ murine osteosarcoma viral oncogene homolog	yes
						3725	JUN	jun proto-oncogene
						4129	MAOB	monoamine oxidase B (EC:1.4.3.4)
						468	ATF4	activating transcription factor 4
						816	CAMK2B	calcium/calmodulin-dependent protein kinase II beta (EC:2.7.11.17)
		hsa05034	Alcoholism - Homo sapiens (human) (19)		19	121504	HIST4H4	histone cluster 4, H4	yes
						126961	HIST2H3C	histone cluster 2, H3c
						255626	HIST1H2BA	histone cluster 1, H2ba
						3014	H2AFX	H2A histone family, member X
						3017	HIST1H2BD	histone cluster 1, H2bd
						3018	HIST1H2BB	histone cluster 1, H2bb
						4129	MAOB	monoamine oxidase B (EC:1.4.3.4)
						440093	H3F3C	H3 histone, family 3C
						468	ATF4	activating transcription factor 4
						5594	MAPK1	mitogen-activated protein kinase 1 (EC:2.7.11.24)
						5595	MAPK3	mitogen-activated protein kinase 3 (EC:2.7.11.24)
						8337	HIST2H2AA3	histone cluster 2, H2aa3
						8338	HIST2H2AC	histone cluster 2, H2ac
						8345	HIST1H2BH	histone cluster 1, H2bh
						8347	HIST1H2BC	histone cluster 1, H2bc
						8349	HIST2H2BE	histone cluster 2, H2be
						8365	HIST1H4H	histone cluster 1, H4h
						8370	HIST2H4A	histone cluster 2, H4a
						85236	HIST1H2BK	histone cluster 1, H2bk
	6.6 Cardiovascular diseases
		hsa05410	Hypertrophic cardiomyopathy (HCM) - Homo sapiens (human) (8)	C=83;O=8;E=1.93;R=4.14;rawP=0.0007;adjP=0.0011	8	3569	IL6	interleukin 6
						3690	ITGB3	integrin, beta 3 (platelet glycoprotein IIIa, antigen CD61)
						4000	LMNA	lamin A/C
						488	ATP2A2	ATPase, Ca++ transporting, cardiac muscle, slow twitch 2 (EC:3.6.3.8)
						60	ACTB	actin, beta
						71	ACTG1	actin gamma 1
						7124	TNF	tumor necrosis factor
						7171	TPM4	tropomyosin 4
		hsa05412	Arrhythmogenic right ventricular cardiomyopathy (ARVC) - Homo sapiens (human) (8)	C=74;O=8;E=1.72;R=4.64;rawP=0.0003;adjP=0.0005	8	1499	CTNNB1	catenin (cadherin-associated protein), beta 1, 88kDa
						3690	ITGB3	integrin, beta 3 (platelet glycoprotein IIIa, antigen CD61)
						3728	JUP	junction plakoglobin
						4000	LMNA	lamin A/C
						488	ATP2A2	ATPase, Ca++ transporting, cardiac muscle, slow twitch 2 (EC:3.6.3.8)
						60	ACTB	actin, beta
						6934	TCF7L2	transcription factor 7-like 2 (T-cell specific, HMG-box)
						71	ACTG1	actin gamma 1
		hsa05414	Dilated cardiomyopathy - Homo sapiens (human) (7)	C=90;O=7;E=2.10;R=3.34;rawP=0.0051;adjP=0.0069	7	3690	ITGB3	integrin, beta 3 (platelet glycoprotein IIIa, antigen CD61)
						4000	LMNA	lamin A/C
						488	ATP2A2	ATPase, Ca++ transporting, cardiac muscle, slow twitch 2 (EC:3.6.3.8)
						60	ACTB	actin, beta
						71	ACTG1	actin gamma 1
						7124	TNF	tumor necrosis factor
						7171	TPM4	tropomyosin 4
		hsa05416	Viral myocarditis - Homo sapiens (human) (15)	C=70;O=17;E=1.63;R=10.42;rawP=3.82e-13;adjP=1.50e-12	17	1982	EIF4G2	eukaryotic translation initiation factor 4 gamma, 2
						2534	FYN	FYN proto-oncogene, Src family tyrosine kinase (EC:2.7.10.2)
						3105	HLA-A	major histocompatibility complex, class I, A
						3106	HLA-B	major histocompatibility complex, class I, B
						3107	HLA-C	major histocompatibility complex, class I, C
						3123	HLA-DRB1	major histocompatibility complex, class II, DR beta 1
						3383	ICAM1	intercellular adhesion molecule 1
						5879	RAC1	ras-related C3 botulinum toxin substrate 1 (rho family, small GTP binding protein Rac1)
						60	ACTB	actin, beta
						71	ACTG1	actin gamma 1
						836	CASP3	caspase 3, apoptosis-related cysteine peptidase (EC:3.4.22.56)
						841	CASP8	caspase 8, apoptosis-related cysteine peptidase (EC:3.4.22.61)
						842	CASP9	caspase 9, apoptosis-related cysteine peptidase (EC:3.4.22.62)
						857	CAV1	caveolin 1, caveolae protein, 22kDa
						959	CD40LG	CD40 ligand
						4627	MYH9	myosin, heavy chain 9, non-muscle
						79784	MYH14	myosin, heavy chain 14, non-muscle
	6.7 Endocrine and metabolic diseases
		hsa04930	Type II diabetes mellitus - Homo sapiens (human) (12)	C=48;O=12;E=1.12;R=10.73;rawP=7.74e-10;adjP=2.13e-09	12	2475	MTOR	mechanistic target of rapamycin (serine/threonine kinase) (EC:2.7.11.1)
						3099	HK2	hexokinase 2 (EC:2.7.1.1)
						5315	PKM	pyruvate kinase, muscle (EC:2.7.1.40)
						5580	PRKCD	protein kinase C, delta (EC:2.7.10.2 2.7.11.13)
						5581	PRKCE	protein kinase C, epsilon (EC:2.7.11.13)
						5594	MAPK1	mitogen-activated protein kinase 1 (EC:2.7.11.24)
						5595	MAPK3	mitogen-activated protein kinase 3 (EC:2.7.11.24)
						5599	MAPK8	mitogen-activated protein kinase 8 (EC:2.7.11.24)
						7124	TNF	tumor necrosis factor
						8651	SOCS1	suppressor of cytokine signaling 1
						8660	IRS2	insulin receptor substrate 2
						9021	SOCS3	suppressor of cytokine signaling 3
		hsa04940	Type I diabetes mellitus - Homo sapiens (human) (13)	C=43;O=13;E=1.00;R=12.97;rawP=1.06e-11;adjP=3.47e-11	13	3105	HLA-A	major histocompatibility complex, class I, A
						3106	HLA-B	major histocompatibility complex, class I, B
						3107	HLA-C	major histocompatibility complex, class I, C
						3123	HLA-DRB1	major histocompatibility complex, class II, DR beta 1
						3329	HSPD1	heat shock 60kDa protein 1 (chaperonin)
						3458	IFNG	interferon, gamma
						355	FAS	Fas cell surface death receptor
						3553	IL1B	interleukin 1, beta
						3558	IL2	interleukin 2
						356	FASLG	Fas ligand (TNF superfamily, member 6)
						3592	IL12A	interleukin 12A
						3593	IL12B	interleukin 12B
						7124	TNF	tumor necrosis factor
		hsa04932	Non-alcoholic fatty liver disease (NAFLD) - Homo sapiens (human) (25)		25	1649	DDIT3	DNA-damage-inducible transcript 3	yes
						1965	EIF2S1	eukaryotic translation initiation factor 2, subunit 1 alpha, 35kDa
						207	AKT1	v-akt murine thymoma viral oncogene homolog 1 (EC:2.7.11.1)
						2081	ERN1	endoplasmic reticulum to nucleus signaling 1 (EC:2.7.11.1)
						2932	GSK3B	glycogen synthase kinase 3 beta (EC:2.7.11.1 2.7.11.26)
						355	FAS	Fas cell surface death receptor
						3553	IL1B	interleukin 1, beta
						356	FASLG	Fas ligand (TNF superfamily, member 6)
						3569	IL6	interleukin 6
						3576	CXCL8	chemokine (C-X-C motif) ligand 8
						3725	JUN	jun proto-oncogene
						468	ATF4	activating transcription factor 4
						4790	NFKB1	nuclear factor of kappa light polypeptide gene enhancer in B-cells 1
						5599	MAPK8	mitogen-activated protein kinase 8 (EC:2.7.11.24)
						581	BAX	BCL2-associated X protein
						5879	RAC1	ras-related C3 botulinum toxin substrate 1 (rho family, small GTP binding protein Rac1)
						5970	RELA	v-rel avian reticuloendotheliosis viral oncogene homolog A
						7124	TNF	tumor necrosis factor
						7494	XBP1	X-box binding protein 1
						836	CASP3	caspase 3, apoptosis-related cysteine peptidase (EC:3.4.22.56)
						841	CASP8	caspase 8, apoptosis-related cysteine peptidase (EC:3.4.22.61)
						8660	IRS2	insulin receptor substrate 2
						9021	SOCS3	suppressor of cytokine signaling 3
						9451	EIF2AK3	eukaryotic translation initiation factor 2-alpha kinase 3 (EC:2.7.11.1)
						998	CDC42	cell division cycle 42
		hsa04931	Insulin resistance - Homo sapiens (human) (16)		16	207	AKT1	v-akt murine thymoma viral oncogene homolog 1 (EC:2.7.11.1)	yes
						2475	MTOR	mechanistic target of rapamycin (serine/threonine kinase) (EC:2.7.11.1)
						2932	GSK3B	glycogen synthase kinase 3 beta (EC:2.7.11.1 2.7.11.26)
						3569	IL6	interleukin 6
						4790	NFKB1	nuclear factor of kappa light polypeptide gene enhancer in B-cells 1
						4792	NFKBIA	nuclear factor of kappa light polypeptide gene enhancer in B-cells inhibitor, alpha
						5106	PCK2	phosphoenolpyruvate carboxykinase 2 (mitochondrial) (EC:4.1.1.32)
						5580	PRKCD	protein kinase C, delta (EC:2.7.10.2 2.7.11.13)
						5581	PRKCE	protein kinase C, epsilon (EC:2.7.11.13)
						5599	MAPK8	mitogen-activated protein kinase 8 (EC:2.7.11.24)
						5970	RELA	v-rel avian reticuloendotheliosis viral oncogene homolog A
						6513	SLC2A1	solute carrier family 2 (facilitated glucose transporter), member 1
						6774	STAT3	signal transducer and activator of transcription 3 (acute-phase response factor)
						7124	TNF	tumor necrosis factor
						8660	IRS2	insulin receptor substrate 2
						9021	SOCS3	suppressor of cytokine signaling 3
