# Supplementary material for: DenHunt - A Comprehensive Database of the Intricate Network of Dengue-Human Interactions
Source: PLoS Negl Trop Dis. 2016 Sep 12;10(9):e0004965. doi: 10.1371/journal.pntd.0004965 (PMC5019383; doi:10.1371/journal.pntd.0004965)
Supplement: S8 Dataset — This file contains the list of dengue virus interacting human proteins that have been found to be essential for dengue viral replication as inhibiting these proteins caused a reduction in viral replication. (XLSX) [file pntd.0004965.s011.xlsx]

## Sheet: Sheet1
		S8 Dataset:	Dengue virus interacting human proteins that are considered to be DVHFs. This file contains the list of dengue virus interacting human proteins that have been found to be essential for dengue viral replication as inhibiting these proteins caused a reduction in viral replication.
		Human Gene symbol	The Human gene Official symbol
		Human gene Entrez Id	The Human gene Entrez gene id
		Pubmed id	The Pubmed ids of publication where these proteins have been described to be essential for viral replication.
		Direct	Whether the protein was detected as a direct interactor
		Indirect	Whether the protein was detected as a indirect interactor
		DEG	Whether the protein was detected as a differentially expressed gene in dengue infection

## Sheet: uniquepubmedid-DVHF
Human Gene symbol	Human gene Entrez Id	Pubmed id	Direct	Indirect	DEG
CCL5	6352	25521078	direct	indirect	DEG
RAC1	5879	20824170	direct	indirect	DEG
CXCL8	3576	16544247	direct	indirect	DEG
RELA	5970	16544247; 26199460	direct	indirect	DEG
NFKB1	4790	16544247; 26199460	direct	indirect	DEG
VIM	7431	24284321	direct	indirect	DEG
HSPD1	3329	19261350	direct	indirect	DEG
CD14	929	10074110; 22140591	direct	indirect	DEG
TNF	7124	25521078; 23557259	direct	indirect	DEG
IL6	3569	25521078	direct	indirect	DEG
MAPK1	5594	19897220; 19897220; 25131378; 25754930; 25754930; 23557259; 18449425; 18449425	direct	indirect	DEG
AKT1	207	23103292	direct	indirect	DEG
HSPA5	3309	19105951; 22457813	direct	indirect	DEG
HMOX1	3162	23103292	direct	indirect	DEG
CAPRIN1	4076	24992036	direct	indirect	DEG
CTSB	1508	23867824	direct	indirect	DEG
DDX58	23586	22908290; 21113677; 21245912; 23089253; 25521078	direct	indirect	DEG
ERC1	23085	20122152	direct	indirect	DEG
FH	2271	19396146	direct	indirect	DEG
G3BP1	10146	24992036; 26350772	direct	indirect	DEG
G3BP2	9908	24992036	direct	indirect	DEG
IFIH1	64135	21113677; 21245912	direct	indirect	DEG
MX1	4599	25521078	direct	indirect	DEG
PDIA3	2923	22207023	direct	indirect	DEG
PRKRA	8575	20534863; 23372823; 11689052	direct	indirect	DEG
RSAD2	91543	20534863	direct	indirect	DEG
SERPINE1	5054	20886187	direct	indirect	DEG
STAT2	6773	22908290; 24223959	direct	indirect	DEG
TLR6	10333	25046486	direct	indirect	DEG
TNFRSF9	3604	23557259	direct	indirect	DEG
TLR4	7099	26355031	direct	indirect	-
APOE	348	26161501	direct	indirect	-
AP1M1	8907	26090672	direct	indirect	-
APOA1	335	23894648	direct	indirect	-
DNM2	1785	20122152; 22140591; 22457813	direct	indirect	-
HMGB1	3146	22860034	direct	indirect	-
PDIA2	64714	22422622; 23103292	direct	indirect	-
PLIN3	10226	26161501	direct	indirect	-
PRKDC	5591	22999307	direct	indirect	-
SIK3	23387	25046486	direct	indirect	-
SYNGR1	9145	19396146; 26221025	direct	indirect	-
TAZ	6901	19396146; 26221025	direct	indirect	-
DAXX	1616	22664104; 19944121; 25019989	direct	-	DEG
KAT2B	8850	22860034	direct	-	DEG
ATP6V0E1	8992	18573235	direct	-	DEG
CDK9	1025	20618343	direct	-	DEG
ARF1	375	26031340	direct	-	DEG
ARF4	378	22105072; 26031340	direct	-	DEG
C4BPA	722	21642539	direct	-	DEG
CANX	821	19105951	direct	-	DEG
CD209	30835	23124109	direct	-	DEG
CLDN1	9076	19962368; 19962368; 24074594	direct	-	DEG
DYNLT1	6993	21767858	direct	-	DEG
EIF4A1	1973	25866185	direct	-	DEG
EXOC1	55763	23522008; 19889084	direct	-	DEG
FASN	2194	20855599	direct	-	DEG
HIST2H2BE	8349	21909430	direct	-	DEG
HNRNPC	3183	25890165	direct	-	DEG
HSPA8	3312	26221025	direct	-	DEG
KDELR1	10945	25753416	direct	-	DEG
M6PR	4074	18266465	direct	-	DEG
NCL	4691	24027323	direct	-	DEG
PTB	5725	19380576; 19380576; 19380576; 19450550; 19692542; 19692542	direct	-	DEG
PTBP1	5725	19380576; 19380576; 19380576; 19450550	direct	-	DEG
UBE2I	7329	17265167	direct	-	-
CCNT1	904	20618343	direct	-	-
ARF5	381	22105072	direct	-	-
CALR	811	19105951	direct	-	-
CAMLG	819	22281498	direct	-	-
GBF1	8729	26031340	direct	-	-
HIST2H2AC	8338	21909430	direct	-	-
HIST2H3C	126961	21909430	direct	-	-
HIST4H4	121504	21909430	direct	-	-
LSM1	27257	25872476	direct	-	-
TARBP2	6895	26221025	direct	-	-
TMEM173	340061	23055924; 23055924	direct	-	-
XPO1	7514	19297323	direct	-	-
CDC42	998	20855599	-	indirect	DEG
JUN	3725	19897220; 16544247	-	indirect	DEG
XBP1	7494	20855599; 17888185	-	indirect	DEG
TP53	7157	18606243; 19382257	-	indirect	DEG
PML	5371	25962098	-	indirect	DEG
NFKB2	4791	26199460	-	indirect	DEG
IRF7	3665	22908290	-	indirect	DEG
EIF2S1	1965	17888185	-	indirect	DEG
EIF2AK3	9451	25046486	-	indirect	DEG
FOS	2353	16544247	-	indirect	DEG
CASP1	834	23152543; 19382257	-	indirect	DEG
IL1B	3553	25521078	-	indirect	DEG
WASF2	10163	20122152	-	indirect	DEG
CCR5	1234	25939314	-	indirect	DEG
BAX	581	18606243	-	indirect	DEG
IFNA1	3439	25521078	-	indirect	DEG
ATP6V1H	51606	19396146	-	indirect	DEG
ATP6V0D1	9114	19396146	-	indirect	DEG
ATP6AP1	537	19396146; 26212330	-	indirect	DEG
PIP5K1A	8394	20122152	-	indirect	DEG
AP2B1	163	20122152	-	indirect	DEG
HPSE	10855	22908290	-	indirect	DEG
ACTR2	10097	20122152	-	indirect	DEG
ADM	133	22908290	-	indirect	DEG
AP1B1	162	20122152	-	indirect	DEG
ATG12	9140	20855599	-	indirect	DEG
ATP6AP2	10159	19396146	-	indirect	DEG
AXL	558	23084921	-	indirect	DEG
BST2	684	23236425	-	indirect	DEG
CD9	928	22908290	-	indirect	DEG
CDKN3	1033	25046486	-	indirect	DEG
COPB2	9276	25046486	-	indirect	DEG
CTSS	1520	23867824	-	indirect	DEG
DIAPH1	1729	20122152; 20855599	-	indirect	DEG
EEA1	8411	20122152	-	indirect	DEG
EIF2AK1	27102	25046486	-	indirect	DEG
EPS15	2060	20122152; 19295646	-	indirect	DEG
FDFT1	2222	19419745	-	indirect	DEG
GBP1	2633	23186538	-	indirect	DEG
GCH1	2643	19396146	-	indirect	DEG
HNRNPH1	3187	22207023	-	indirect	DEG
HSPA4	3308	21142441	-	indirect	DEG
IDO1	3620	25521078	-	indirect	DEG
IFI6	2537	22908290; 25138703; 26244642	-	indirect	DEG
IFIT1	3434	24223959	-	indirect	DEG
IFIT2	3433	24223959	-	indirect	DEG
IFIT3	3437	24223959	-	indirect	DEG
IFIT5	24138	24223959	-	indirect	DEG
IFITM1	8519	25521078	-	indirect	DEG
IFITM2	10581	22908290; 25521078; 20534863	-	indirect	DEG
IFITM3	10410	22908290; 25521078; 20534863; 23658454; 25131332	-	indirect	DEG
IFNB1	3456	25521078	-	indirect	DEG
IRF1	3659	22908290	-	indirect	DEG
ISG15	9636	24769207	-	indirect	DEG
ITSN2	50618	20122152	-	indirect	DEG
JNK	5599	19897220	-	indirect	DEG
LGALS9	3965	25754930	-	indirect	DEG
LILRB1	10859	24550301	-	indirect	DEG
LRIG3	121227	19396146	-	indirect	DEG
MAP1LC3A	84557	19141455	-	indirect	DEG
MAP4K5	11183	25046486	-	indirect	DEG
MIF	4282	21320786	-	indirect	DEG
NAPA	8775	22908290	-	indirect	DEG
OAS1	4938	19923450	-	indirect	DEG
OAS3	4940	25521078; 19923450	-	indirect	DEG
OASL	8638	25521078	-	indirect	DEG
PFKFB3	5209	25046486	-	indirect	DEG
PIP4K2B	8396	25046486	-	indirect	DEG
RAB11B	9230	20122152	-	indirect	DEG
RAB8B	51762	20122152	-	indirect	DEG
RNASEL	6041	19923450; 11689052	-	indirect	DEG
SEC61B	10952	19396146	-	indirect	DEG
TLR3	7098	19134117; 21245912	-	indirect	DEG
TTK	7272	25046486	-	indirect	DEG
XAF1	54739	25138703; 23207547	-	indirect	DEG
ZNF91	7644	19396146	-	indirect	DEG
CBL	867	20122152; 20122152; 20122152	-	indirect	-
CBLC	23624	20122152	-	indirect	-
CLTB	1212	20122152	-	indirect	-
CLTC	1213	20122152; 22140591; 22457813	-	indirect	-
CBLB	868	20122152	-	indirect	-
MAPK11	5600	19897220; 25754930	-	indirect	-
MAPK14	1432	19897220; 25131378; 25754930; 23557259; 18449425	-	indirect	-
SRC	6714	26039671	-	indirect	-
XIAP	331	23207547	-	indirect	-
SDC2	6383	22170634	-	indirect	-
FYN	2534	23616652; 26039671	-	indirect	-
MAPK3	5595	18449425	-	indirect	-
RAB5A	5868	20122152	-	indirect	-
IFNA2	3440	25521078	-	indirect	-
ATP6V1B1	525	19396146	-	indirect	-
ATP6V1B2	526	19396146	-	indirect	-
ATP6V1C2	245973	19396146	-	indirect	-
ATP6V1G2	534	19396146	-	indirect	-
ATP6V1G3	127124	19396146	-	indirect	-
ATP6V0A1	535	20122152	-	indirect	-
ATP6V0B	533	19396146	-	indirect	-
ATP6V0C	527	19396146	-	indirect	-
HIP1	3092	20122152; 20122152	-	indirect	-
ATF6	22926	20855599; 17888185	-	indirect	-
AP2A1	160	20122152	-	indirect	-
AP2M1	1173	25046486	-	indirect	-
MIR30E	407034	25122182	-	indirect	-
PTGER2	5732	19862774	-	indirect	-
PTGER4	5734	19862774	-	indirect	-
ACACA	31	20855599	-	indirect	-
ALPK3	57538	25046486	-	indirect	-
AMPH	273	20122152	-	indirect	-
ARPC1B	10095	20122152	-	indirect	-
ARPC3	10094	20122152	-	indirect	-
ARRB1	408	20122152	-	indirect	-
AVPR1B	553	25046486	-	indirect	-
CAMK1	8536	20122152	-	indirect	-
CHRNA2	1135	19396146	-	indirect	-
CIB2	10518	20122152	-	indirect	-
CNOT2	4848	19396146	-	indirect	-
CSNK1D	1453	25046486	-	indirect	-
DCST2	127579	19396146	-	indirect	-
DIAPH3	81624	19396146	-	indirect	-
DNM1	1759	20122152	-	indirect	-
DRD4	1815	24599995	-	indirect	-
EPN1	29924	20122152	-	indirect	-
EPN2	22905	20122152	-	indirect	-
ETNK2	55224	25046486	-	indirect	-
FASTKD5	60493	19396146	-	indirect	-
FES	2242	25046486	-	indirect	-
GALNT10	55568	19396146	-	indirect	-
GANAB	23193	19396146	-	indirect	-
GNB2L1	10399	20855599	-	indirect	-
GORASP1	64689	20122152	-	indirect	-
GSX1	219409	19396146	-	indirect	-
HAVCR1	26762	23084921	-	indirect	-
HIP1R	9026	20122152	-	indirect	-
HMGCR	3156	23642566	-	indirect	-
HMGCS1	3157	19419745	-	indirect	-
HRNR	388697	19396146	-	indirect	-
HTR2A	3356	24599995	-	indirect	-
IFNLR1	163702	22908290	-	indirect	-
LCP2	3937	25046486	-	indirect	-
MAK	4117	25046486	-	indirect	-
MAPK8IP2	23542	20122152	-	indirect	-
MUC2	4583	19396146	-	indirect	-
MVD	4597	19419745	-	indirect	-
NAA35	60560	19396146	-	indirect	-
NEK6	10783	25046486	-	indirect	-
NLRP3	114548	23152543	-	indirect	-
NPR2	4882	19396146	-	indirect	-
NRG1	3084	19396146	-	indirect	-
PACSIN3	29763	20122152	-	indirect	-
PHF2	5253	19396146	-	indirect	-
PHOSPHO2	493911	19396146	-	indirect	-
PICK1	9463	25046486	-	indirect	-
PKIB	5570	25046486	-	indirect	-
PKN3	29941	25046486	-	indirect	-
PLA2G7	7941	10954569	-	indirect	-
PLK3	1263	25046486	-	indirect	-
PNLIPRP1	5407	19396146	-	indirect	-
PRG4	10216	19396146	-	indirect	-
PRKCD	5580	25046486	-	indirect	-
PRR12	57479	19396146	-	indirect	-
RAB29	8934	20122152; 20855599	-	indirect	-
RAB3A	5864	20122152	-	indirect	-
RAB3D	9545	20122152	-	indirect	-
REL	5966	16544247; 26199460; 26199460; 26199460	-	indirect	-
RELB	5971	26199460	-	indirect	-
RNASEK	440400	26212330	-	indirect	-
SCARB1	949	23894648	-	indirect	-
SHPK	23729	25046486	-	indirect	-
SLC5A12	159963	19396146	-	indirect	-
SMAD7	4092	25046486	-	indirect	-
STAU1	6780	20122152	-	indirect	-
STK32B	55351	25046486	-	indirect	-
STYK1	55359	25046486	-	indirect	-
SYNJ1	8867	20122152	-	indirect	-
SYNJ2	8871	20122152	-	indirect	-
TBX20	57057	19396146	-	indirect	-
TESK2	10420	25046486	-	indirect	-
TIMD4	91937	23084921	-	indirect	-
TRIM56	81844	25253338	-	indirect	-
TYRO3	7301	23084921	-	indirect	-
UBE2E3	10477	19396146	-	indirect	-
UGP2	7360	25046486	-	indirect	-
UHMK1	127933	25046486	-	indirect	-
USP13	8975	23940278	-	indirect	-
USP14	9097	22306365	-	indirect	-
ZBTB41	360023	19396146	-	indirect	-
